# Supplementary material for: Quantitative Phosphoproteomic and System-Level Analysis of TOR Inhibition Unravel Distinct Organellar Acclimation in Chlamydomonas reinhardtii
Source: Front Plant Sci. 2018 Nov 28;9:1590. doi: 10.3389/fpls.2018.01590 (PMC6280106; doi:10.3389/fpls.2018.01590)
Supplement: Table S2 — Phosphopeptides detected and quantified in this work and their abundance changes along two-way ANOVA results, as well as PCA loadings. [file Table_2.xlsx]

## Sheet: Tables description
Tables
Table S2 represent all the quantified phosphopeptides after the filtering applied as described in Material and Methods.
PCA Loadings sheet merged the Table S2 with the extracted PCA loadings from the phosphopeptides-based PCA analysis

## Sheet: Table S2
Unique ID	BINCODE	NAME	DESCRIPTION	gene identifier JGI	C0 average intensities	C24 average intensities	C48 average intensities	R0 average intensities	R24 average intensities	R48 average intensities	N: -Log Two-way ANOVA p value treatment	N: -Log Two-way ANOVA p value time	N: -Log Two-way ANOVA p value Interaction	N: stddev C0	N: stddev C24	N: stddev C48	N: stddev R0	N: stddev R24	N: stddev R48	Intensity C1-0	Intensity C1-24	Intensity C1-48	Intensity C2-0	Intensity C2-24	Intensity C2-48	Intensity C3-0	Intensity C3-24	Intensity C3-48	Intensity R1-0	Intensity R1-24	Intensity R1-48	Intensity R2-0	Intensity R2-24	Intensity R2-48	Intensity R3-0	Intensity R3-24	Intensity R3-48	Ttest 0H	ttest24h	ttest48h		C: Amino acid	C: Charge	C: Multiplicity	N: Localization prob	N: PEP	N: Score	N: Delta score	N: Score for localization
A8J225	35.2	not assigned.unknown	(original description: Low-CO2-inducible protein (Fragment) OS=Chlamydomonas reinhardtii GN=LCI23 PE=4 SV=1)	Cre06.g281600.t2.1	1.13154	0.951783	1.00519	0.839917	0.862907	0.860486	2.6345	0.412666	0.672293	0.0527497	0.167535	0.152208	0.0326716	0.0194688	0.0207909	1.16939	0.88738	1.08894	1.07129	1.14196	1.09713	1.15395	0.826005	0.829497	0.815278	0.885177	0.843502	0.876977	0.854431	0.883672	0.827494	0.849113	0.854285	0.0807495	0.000497565	0.442467		S	4	___2	0.993927	3.44533e-05	49.937	38.077	46.289
A8HW77	35.2	not assigned.unknown	(original description: Predicted protein OS=Chlamydomonas reinhardtii GN=CHLREDRAFT_182288 PE=4 SV=1)	Cre06.g269650.t1.2	1.14468	1.20207	1.10122	0.979751	1.05029	0.972361	1.1283	0.204356	0.00833631	0.269909	0.0872506	0.04856	0.0853885	0.195153	0.166772	1.35145	1.27955	1.09716	1.24325	1.10756	1.15168	0.839343	1.2191	1.05482	1.02545	1.22795	1.16468	0.881238	0.841409	0.867645	1.03256	1.0815	0.884759	0.344293	0.00186939	0.77519		S	2	___2	0.999988	0.00228695	77.42	10.035	68.751
A8HW77	35.2	not assigned.unknown	(original description: Predicted protein OS=Chlamydomonas reinhardtii GN=CHLREDRAFT_182288 PE=4 SV=1)	Cre06.g269650.t1.2	1.13791	1.20207	1.10122	0.969084	1.05672	1.00638	1.01884	0.187784	0.0361274	0.281418	0.0872506	0.04856	0.10385	0.184873	0.139408	1.35145	1.27955	1.09716	1.24325	1.10756	1.15168	0.819013	1.2191	1.05482	1.02545	1.22795	1.16468	0.849239	0.860706	0.901921	1.03256	1.0815	0.952544	0.344293	0.00231708	0.946123		S	2	___2	0.999977	0.00228695	77.42	10.035	68.751
A8HXC5	13.1.6.3.1	amino acid metabolism.synthesis.aromatic aa.phenylalanine.arogenate dehydratase / prephenate dehydratase	(chl4|523076 : 683.0) no description available & (gnl|cdd|38008 : 331.0) no description available & (loc_os03g17730.1 : 330.0) no description available & (at3g07630 : 323.0) Encodes a plastid-localized arogenate dehydratase involved in phenylalanine biosynthesis. Not less than six genes encoding ADT were identi&#64257;ed in the Arabidopsis genome: ADT1 [At1g11790]; ADT2 [At3g07630]; ADT3 [At2g278…	0	0.919324	0.854849	0.867051	0.895563	0.874026	0.853341	0.106146	0.730187	0.151056	0.0576719	0.045249	0.0675687	0.0507982	0.0119012	0.00392427	0.985777	0.840656	0.91287	0.889842	0.905493	0.898832	0.882352	0.818398	0.789452	0.934448	0.876506	0.849433	0.838089	0.86108	0.853307	0.914153	0.884492	0.857281	0.618626	0.00437547	0.159207		S	2	___1	0.999993	0.00206652	110.64	77.235	110.64
A8J827	29.1.40	protein.aa activation.bifunctional aminoacyl-tRNA synthetase	(chl4|526216 : 708.0) no description available & (gnl|cdd|82724 : 556.0) no description available & (gnl|cdd|39365 : 482.0) no description available & (at5g52520 : 473.0) OVULE ABORTION 6 (OVA6); FUNCTIONS IN: proline-tRNA ligase activity, aminoacyl-tRNA ligase activity, nucleotide binding, ATP binding; INVOLVED IN: regulation of photosynthesis, embryo sac development, seed development, tRNA amin…	0	1.08664	0.891098	0.96033	1.17323	1.09569	1.00415	0.99432	0.838465	0.241899	0.180871	0.061303	0.164416	0.0539863	0.0684036	0.189243	1.13729	0.850543	1.13578	0.885841	0.861132	0.809794	1.23678	0.961621	0.935414	1.15078	1.1663	0.79292	1.13409	1.02972	1.15823	1.23482	1.09105	1.0613	0.978018	0.0049126	0.486467		T	2	___1	0.977471	0.0063089	104.07	43.903	104.07
A8JJJ2	35.2	not assigned.unknown	(original description: Predicted protein (Fragment) OS=Chlamydomonas reinhardtii GN=CHLREDRAFT_181168 PE=4 SV=1)	0	0.909749	0.896439	0.98983	0.887925	0.966666	0.899286	0.190523	0.340719	0.894315	0.0599915	0.0571995	0.0248452	0.0922324	0.0810641	0.0356631	0.920165	0.857593	0.990395	0.96385	0.962123	0.964707	0.845231	0.869602	1.01439	0.819523	0.964475	0.861857	0.851431	0.88672	0.903128	0.99282	1.0488	0.932873	0.518487	0.00552842	0.261019		S	3	___1	0.826437	9.77113e-07	85.423	66.518	85.423
A8IUB5	35.2	not assigned.unknown	(original description: Arsenate reductase OS=Chlamydomonas reinhardtii GN=RDP3 PE=2 SV=1)	Cre07.g352550.t1.2	0.914962	0.905326	1.02125	0.840237	0.866979	0.88094	1.30183	0.558675	0.245549	0.0614109	0.0747598	0.0218997	0.0710262	0.0682718	0.144876	0.969706	0.834998	0.997049	0.926624	0.983843	1.0397	0.848556	0.897136	1.02701	0.856498	0.829995	1.03823	0.76249	0.82518	0.752954	0.901722	0.945764	0.851638	0.770929	0.00691696	0.70275		S	2	___1	1	6.14537e-06	140.31	121.92	140.31
A8HNT4	35.2	not assigned.unknown	(original description: Predicted protein OS=Chlamydomonas reinhardtii GN=CHLREDRAFT_190192 PE=4 SV=1)	Cre14.g617100.t1.2	0.89055	0.918668	1.03944	0.832338	0.89361	0.853108	1.96608	0.967616	0.973304	0.0475027	0.117632	0.0103465	0.0297675	0.08302	0.00688545	0.86581	0.910978	1.03413	0.945317	1.03996	1.03282	0.860524	0.805069	1.05136	0.797967	0.83524	0.851423	0.849771	0.85694	0.86068	0.849277	0.988651	0.847222	0.108126	0.00798423	0.909984		S	3	___2	1	0.00444632	88.427	50.989	78.552
A8JH38	35.1.25	not assigned.no ontology.paired amphipathic helix repeat-containing protein	(chl4|521081 : 879.0) no description available & (gnl|cdd|35161 : 326.0) no description available & (loc_os05g01020.1 : 229.0) no description available & (at1g70060 : 213.0) Encodes a homolog of the transcriptional repressor SIN3 (AT1G24190).; SIN3-like 4 (SNL4); INVOLVED IN: regulation of transcription, DNA-dependent; LOCATED IN: nucleus; EXPRESSED IN: 22 plant structures; EXPRESSED DURING: 13 g…	0	1.01396	1.02426	1.11525	1.02933	1.03873	1.11698	0.0726787	0.504366	0.00300175	0.083788	0.139778	0.019671	0.148678	0.162786	0.014952	0.922309	0.864444	1.11737	1.08662	1.08465	1.09461	1.03295	1.12369	1.13378	1.09382	1.137	1.13377	1.13488	1.12836	1.11206	0.859299	0.850828	1.10511	0.119637	0.0080236	0.150907		S	3	___1	1	3.96028e-08	92.07	63.677	85.715
A8HPR1	35.2	not assigned.unknown	(original description: Predicted protein (Fragment) OS=Chlamydomonas reinhardtii GN=CHLREDRAFT_146314 PE=4 SV=1)	0	0.983018	0.980314	0.982877	0.837294	0.88401	0.90447	3.18591	0.289729	0.302828	0.0303431	0.00570052	0.0120026	0.0566282	0.0713591	0.0734901	1.01794	0.985754	0.983601	0.963105	0.980804	0.970528	0.968008	0.974385	0.994501	0.90268	0.965537	0.983071	0.805099	0.832892	0.892866	0.804103	0.853603	0.837472	0.166136	0.00838195	0.000896231		S	2	___2	0.99125	0.00702627	77.66	43.567	77.66
A8J7H2	35.2	not assigned.unknown	(chl4|520600 : 1288.0) no description available & (gnl|cdd|36593 : 181.0) no description available & (at2g30170 : 140.0) Protein phosphatase 2C family protein; FUNCTIONS IN: phosphoprotein phosphatase activity, catalytic activity; INVOLVED IN: biological_process unknown; LOCATED IN: chloroplast; EXPRESSED IN: 21 plant structures; EXPRESSED DURING: 15 growth stages; CONTAINS InterPro DOMAIN/s: Pro…	0	1.02546	1.07276	0.968439	0.791691	0.981312	0.937758	1.53772	0.777261	0.609759	0.162433	0.00905709	0.0968807	0.00749174	0.1348	0.0879473	0.950736	1.07398	1.02232	1.2118	1.06316	1.02641	0.913829	1.08115	0.856596	0.795895	1.00005	0.99351	0.796137	0.838124	0.836374	0.783042	1.10576	0.983391	0.32131	0.00897724	0.955482		T	3	___1	0.83652	0.000614909	67.396	43.714	65.184
A8JDG6	27.1.1	RNA.processing.splicing	(chl4|517334 : 129.0) no description available & (loc_os02g54770.2 : 93.6) no description available & (at1g23860 : 89.7) Encodes a 9G8-like serine-arginine rich (SR) protein that interacts in vivo with U1-70K, a U1 small nuclear ribonucleoprotein 70-kDa protein that is involved in nuclear precursor mRNA processing.; RS-containing zinc finger protein 21 (RSZP21); CONTAINS InterPro DOMAIN/s: RNA re…	Cre17.g712000.t1.1	0.907512	1.02793	1.01411	0.820227	0.928218	0.910693	1.24265	0.880758	0.00487434	0.0403235	0.0324759	0.14254	0.0234964	0.135331	0.123769	0.869235	1.03295	0.855902	0.94961	1.0576	1.05389	0.903691	0.99323	1.13253	0.794236	1.07928	1.04464	0.826484	0.818056	0.886873	0.839962	0.887316	0.800565	0.642146	0.013113	0.0785013		S	2	___3	1	0.00978981	105.03	72.778	105.03
A8IZM8	35.2	not assigned.unknown	(original description: Predicted protein (Fragment) OS=Chlamydomonas reinhardtii GN=CHLREDRAFT_94998 PE=4 SV=1)	0	0.90131	0.896089	0.893287	0.948387	1.00211	1.06697	2.27356	0.399441	0.51067	0.0341948	0.101214	0.122891	0.0079859	0.0172326	0.0305197	0.906458	0.863385	1.02362	0.864833	0.81527	0.779515	0.932639	1.00961	0.87673	0.939283	1.01108	1.04693	0.954209	1.01301	1.10209	0.951669	0.982246	1.05189	0.302005	0.0148808	0.316462		S	2	___1	0.941182	2.83313e-19	185.59	133.98	166.36
A8JDG6	27.1.1	RNA.processing.splicing	(chl4|517334 : 129.0) no description available & (loc_os02g54770.2 : 93.6) no description available & (at1g23860 : 89.7) Encodes a 9G8-like serine-arginine rich (SR) protein that interacts in vivo with U1-70K, a U1 small nuclear ribonucleoprotein 70-kDa protein that is involved in nuclear precursor mRNA processing.; RS-containing zinc finger protein 21 (RSZP21); CONTAINS InterPro DOMAIN/s: RNA re…	Cre17.g712000.t1.1	0.936437	1.02793	1.00446	0.821693	0.949249	0.909189	1.20186	0.724105	0.0213313	0.0616204	0.0324759	0.158674	0.0328557	0.114027	0.123934	0.99069	1.03295	0.82695	0.949178	1.0576	1.05389	0.869441	0.99323	1.13253	0.794236	1.07928	1.04464	0.812748	0.86633	0.881453	0.858095	0.902133	0.801472	0.84721	0.0155215	0.150467		S	2	___3	1	0.00978981	105.03	72.778	105.03
A8JFW3	35.2	not assigned.unknown	(original description: Predicted protein (Fragment) OS=Chlamydomonas reinhardtii GN=CHLREDRAFT_153982 PE=4 SV=1)	0	1.06519	0.924553	0.917154	0.924351	0.821016	0.923989	1.71382	1.7746	0.840742	0.0142099	0.0270044	0.0578446	0.123498	0.0261338	0.0549394	1.07894	0.936083	0.947791	1.05057	0.943878	0.953237	1.06607	0.893697	0.850435	0.89839	0.792936	0.952861	0.815897	0.825486	0.860633	1.05877	0.844627	0.958472	0.180636	0.0155341	0.85812		S	2	___1	1	9.97233e-05	124.29	63.885	103.01
A8J087	35.2	not assigned.unknown	(original description: Vasa intronic gene OS=Chlamydomonas reinhardtii GN=VIG1 PE=4 SV=1)	Cre09.g393358.t1.1	1.0048	1.05212	1.03808	0.975143	1.00541	1.05649	0.186289	0.270729	0.0933732	0.0541467	0.0203149	0.0289664	0.0174039	0.136779	0.15389	1.06267	1.07499	1.00467	0.996345	1.03617	1.05341	0.955376	1.0452	1.05616	0.990893	1.0905	1.11168	0.956458	0.847634	0.88261	0.978078	1.0781	1.17517	0.714678	0.0213809	0.422746		S	2	___1	1	0.00092889	127.52	73.454	105.25
A8JI87	35.2	not assigned.unknown	(original description: Predicted protein (Fragment) OS=Chlamydomonas reinhardtii GN=CHLREDRAFT_154744 PE=4 SV=1)	0	1.04213	0.918507	0.865127	1.05472	0.913447	0.909954	0.188406	2.02972	0.0658357	0.132561	0.0365026	0.0327441	0.0273263	0.102851	0.0788069	1.12871	0.881122	0.901906	0.88952	0.92034	0.85433	1.10815	0.954058	0.839145	1.06056	0.797089	0.87722	1.02494	0.951037	0.999852	1.07864	0.992216	0.852789	0.624085	0.0228361	0.945417		S	3	___1	1	7.34927e-07	101.05	80.631	99.836
A8JEV1	1.1.1.2	PS.lightreaction.photosystem II.PSII polypeptide subunits	(p12852|psbq_chlre : 224.0) Oxygen-evolving enhancer protein 3, chloroplast precursor (OEE3) - Chlamydomonas reinhardtii & (chl4|525487 : 224.0) no description available & (gnl|cdd|69290 : 167.0) no description available & (ipr008797 : 139.1227) Photosystem II PsbQ, oxygen evolving complex (original description: Oxygen evolving enhancer protein 3 OS=Chlamydomonas reinhardtii GN=PSBQ PE=4 SV=1)	Cre08.g372450.t1.2	0.910004	0.918085	0.867098	0.911561	0.965284	1.00931	0.893663	0.10736	0.451061	0.0739595	0.0446888	0.141898	0.0191081	0.111399	0.0221226	0.99535	0.932533	1.02064	0.869983	0.86796	0.839851	0.864679	0.953763	0.7408	0.895229	0.842872	0.998132	0.90688	0.992266	0.995001	0.932575	1.06071	1.03479	0.249662	0.0259305	0.099312		S	2	___1	0.999787	7.28673e-69	180.27	113.26	180.27
A8HNT4	35.2	not assigned.unknown	(original description: Predicted protein OS=Chlamydomonas reinhardtii GN=CHLREDRAFT_190192 PE=4 SV=1)	Cre14.g617100.t1.2	0.902301	0.933384	1.03944	0.826507	0.908495	0.85019	2.44366	1.10446	1.13831	0.0488498	0.102768	0.0103465	0.0263021	0.0726851	0.0188327	0.936741	0.925299	1.03413	0.92377	1.03996	1.03282	0.846394	0.834897	1.05136	0.797967	0.846868	0.846859	0.849771	0.889965	0.833245	0.831783	0.988651	0.870466	0.0242059	0.0266034	0.877427		S	3	___2	1	0.00444632	88.427	50.989	78.552
A8J8N5	35.2	not assigned.unknown	(original description: Predicted protein OS=Chlamydomonas reinhardtii GN=CHLREDRAFT_176993 PE=4 SV=1)	0	1.09087	1.00275	0.986099	0.904251	1.0094	0.899213	1.04192	0.277845	0.52193	0.142997	0.147573	0.094644	0.0476484	0.0957298	0.0237076	1.20721	1.15722	1.0235	1.13418	0.987822	1.05632	0.931224	0.863213	0.878469	0.92936	1.10333	0.899001	0.849299	0.91197	0.923027	0.934094	1.01289	0.875613	0.144539	0.0267074	0.327719		S	2	___1	1	8.05232e-09	122.69	58.317	122.69
A8HW92	29.2.3	protein.synthesis.initiation	(chl4|523240 : 482.0) no description available & (loc_os02g54700.2 : 186.0) no description available & (at3g11400 : 184.0) One of the 2 genes that code for the G subunit of eukaryotic initiation factor 3 (EIF3).; eukaryotic translation initiation factor 3G1 (EIF3G1); CONTAINS InterPro DOMAIN/s: RNA recognition motif, RNP-1 (InterPro:IPR000504), Nucleotide-binding, alpha-beta plait (InterPro:IPR01…	0	0.940324	0.900324	0.998259	0.838856	0.872935	0.918637	2.73971	2.06006	0.610959	0.0087989	0.0601624	0.0182807	0.0406857	0.00893733	0.0495832	0.935686	0.840459	0.978663	0.934814	0.96078	1.01485	0.950471	0.899734	1.00126	0.792764	0.869512	0.875512	0.869775	0.866214	0.907587	0.854029	0.883077	0.972813	0.212043	0.03021	0.365136		S	3	___1	1	0.00809357	52.866	33.616	52.866
A8IWS4	35.2	not assigned.unknown	(original description: Paf1 complex component OS=Chlamydomonas reinhardtii GN=CHLREDRAFT_147410 PE=4 SV=1)	0	0.897347	0.92692	0.95871	0.914771	0.939066	0.991316	0.320818	0.753908	0.0203421	0.0100212	0.0649134	0.0519386	0.098656	0.06444	0.0264199	0.899552	1.00166	0.922727	0.886407	0.884582	0.93515	0.906082	0.894522	1.01825	0.870794	0.988827	1.02153	1.02777	0.962095	0.972565	0.845752	0.866275	0.979852	0.747288	0.031257	0.501887		S	2	___1	0.999834	1.06609e-05	90.765	64.878	81.713
A8HNI1	29.5.11.4.2	protein.degradation.ubiquitin.E3.RING	(chl4|511691 : 517.0) no description available & (at1g04790 : 85.5) RING/U-box superfamily protein; FUNCTIONS IN: zinc ion binding; EXPRESSED IN: 24 plant structures; EXPRESSED DURING: 15 growth stages; CONTAINS InterPro DOMAIN/s: Zinc finger, RING-type (InterPro:IPR001841), Zinc finger, C3HC4 RING-type (InterPro:IPR018957); BEST Arabidopsis thaliana protein match is: RING/U-box superfamily prote…	0	0.968814	1.01022	0.927392	0.828766	0.907239	0.870005	2.00991	0.581462	0.222941	0.0992895	0.0407393	0.0984497	0.0295734	0.0759401	0.0305875	1.08049	1.03347	0.972909	0.935452	0.963183	0.994848	0.890503	1.03402	0.81442	0.854469	0.863988	0.869309	0.796444	0.862805	0.900934	0.835384	0.994924	0.839771	0.00612115	0.033778	0.79594		S	2	___1	0.999971	0.000193434	121.13	89.839	121.13
A8HWR8	35.2	not assigned.unknown	(original description: Predicted protein OS=Chlamydomonas reinhardtii GN=CHLREDRAFT_167211 PE=4 SV=1)	0	1.22373	1.1082	0.975638	0.912071	0.866356	0.830404	4.08113	1.72826	0.564176	0.0845157	0.099566	0.141551	0.0643589	0.0209968	0.040768	1.30952	1.20395	1.03219	1.22112	1.00522	1.08017	1.14055	1.11543	0.814554	0.9611	0.888367	0.832192	0.935922	0.864155	0.870249	0.839191	0.846546	0.788772	0.0318103	0.0345265	0.134965		T	2	___2	1	0.0120784	79.906	30.488	68.735
A8JCF0	28.1	DNA.synthesis/chromatin structure	(chl4|524728 : 1617.0) no description available & (ipr001208 : 1500.0) DNA-dependent ATPase MCM & (gnl|cdd|35698 : 933.0) no description available & (loc_os11g29380.1 : 804.0) no description available & (at1g44900 : 798.0) Encodes MCM2 (MINICHROMOSOME MAINTENANCE 2), a protein essential to embryo development. Overexpression results in altered root meristem function.; MINICHROMOSOME MAINTENANCE 2 …	Cre07.g338000.t1.2	1.11317	0.938847	0.877664	0.828819	0.879945	0.827187	2.86155	1.49792	1.76945	0.0770919	0.0503629	0.0267416	0.0936018	0.0936214	0.0209463	1.18099	0.973332	0.861537	1.02933	0.962158	0.908532	1.1292	0.881052	0.862923	0.897011	0.984288	0.828481	0.867344	0.852255	0.847456	0.722103	0.803291	0.805623	0.381653	0.0351698	0.115588		Y	3	___2	0.999223	0.0179765	59.342	20.086	59.342
A8HWR8	35.2	not assigned.unknown	(original description: Predicted protein OS=Chlamydomonas reinhardtii GN=CHLREDRAFT_167211 PE=4 SV=1)	0	1.22373	1.1082	0.977787	0.903398	0.880971	0.860694	3.80369	1.36857	0.768571	0.0845157	0.099566	0.137883	0.0791449	0.0336727	0.0423258	1.30952	1.20395	1.03219	1.22112	1.00522	1.08017	1.14055	1.11543	0.821002	0.9611	0.849163	0.825334	0.935922	0.877511	0.907592	0.813173	0.916241	0.849155	0.0290184	0.0407501	0.19525		T	2	___2	1	0.0120784	79.906	30.488	68.735
A8JC49	35.2	not assigned.unknown	(original description: Flagellar associated protein OS=Chlamydomonas reinhardtii GN=FAP152 PE=4 SV=1)	0	0.942427	0.913848	0.919667	0.935784	0.882675	0.885077	0.525401	0.535376	0.0673978	0.0602088	0.0574351	0.0339365	0.0408137	0.0487482	0.0344439	0.966158	0.935626	0.884592	0.987155	0.957209	0.952338	0.873969	0.848709	0.922071	0.896472	0.863438	0.908346	0.93293	0.84648	0.845509	0.977949	0.938106	0.901377	0.223026	0.0429642	0.135505		S	2	___2	1	0.0124116	86.189	54.592	86.189
A8J6H1	30.5	signalling.G-proteins	(chl4|517557 : 456.0) no description available & (gnl|cdd|58007 : 248.0) no description available & (gnl|cdd|35310 : 152.0) no description available & (at1g02130 : 105.0) Belongs to the Rab1 GTPase subfamily. This small GTP-binding protein is required in ER to Golgi transportation.; RAS 5 (RA-5); FUNCTIONS IN: GTP binding; INVOLVED IN: response to cadmium ion, ER to Golgi vesicle-mediated transpo…	Cre17.g722350.t1.2	0.895927	0.934019	0.992822	0.818723	0.882809	0.868232	3.45145	1.89108	0.605896	0.0466592	0.0292424	0.0320691	0.0471116	0.0357715	0.0192981	0.917825	0.905767	1.02761	0.927609	0.93213	0.986425	0.842347	0.96416	0.964433	0.820447	0.846185	0.862143	0.770773	0.884582	0.852712	0.864949	0.917662	0.88984	0.057227	0.0439427	0.49156		Y	3	___2	0.999358	0.0244358	54.501	26.411	54.501
A8J6C3	2.2.2.3	major CHO metabolism.degradation.starch.glucan water dikinase	(chl4|517507 : 907.0) no description available & (q2qtc2|pwd_orysa : 493.0) Phosphoglucan, water dikinase, chloroplast precursor (EC 2.7.9.5) - Oryza sativa (Rice) & (loc_os12g20150.1 : 493.0) no description available & (at5g26570 : 388.0) chloroplastidic phosphoglucan, water dikinase (PWD) which is required for normal degradation of leaf starch in Arabidopsis. NMR analysis of the mutants, sugges…	0	0.966904	1.07208	1.12814	1.04502	1.10543	1.13891	0.903838	2.41554	0.265084	0.0927345	0.0117424	0.0155955	0.0806254	0.0130188	0.028436	0.949931	1.06895	1.14471	1.06695	1.06222	1.11374	0.883828	1.08507	1.12598	1.01614	1.10611	1.16955	1.13611	1.1181	1.13383	0.982821	1.09209	1.11336	0.585102	0.0497178	0.732917		S	2	___2	1	3.05745e-48	208.37	149.19	191.71
A8J6C3	2.2.2.3	major CHO metabolism.degradation.starch.glucan water dikinase	(chl4|517507 : 907.0) no description available & (q2qtc2|pwd_orysa : 493.0) Phosphoglucan, water dikinase, chloroplast precursor (EC 2.7.9.5) - Oryza sativa (Rice) & (loc_os12g20150.1 : 493.0) no description available & (at5g26570 : 388.0) chloroplastidic phosphoglucan, water dikinase (PWD) which is required for normal degradation of leaf starch in Arabidopsis. NMR analysis of the mutants, sugges…	0	0.936548	1.07208	1.12814	1.04502	0.921091	1.13891	0.0895113	1.4604	1.04657	0.116973	0.0117424	0.0155955	0.0806254	0.175335	0.028436	0.901818	1.06895	1.14471	1.06695	1.06222	1.11374	0.840872	1.08507	1.12598	1.01614	0.782173	1.16955	1.13611	1.1181	1.13383	0.982821	0.863002	1.11336	0.731203	0.0497178	0.80081		S	2	___2	0.995097	4.54942e-109	243.37	171.59	153.06
A8J2Q0	30.3	signalling.calcium	(chl4|520430 : 254.0) no description available & (at2g27030 : 149.0) encodes a calmodulin that has higher affinity to kinesin-like calmodulin binding motor protein than CAM4 or CAM6.; calmodulin 5 (CAM5); FUNCTIONS IN: calcium ion binding; LOCATED IN: plasma membrane; EXPRESSED IN: 23 plant structures; EXPRESSED DURING: 16 growth stages; CONTAINS InterPro DOMAIN/s: EF-Hand 1, calcium-binding site…	Cre03.g150300.t1.2	1.06191	1.04494	1.03524	1.04815	1.03978	1.0781	0.179857	0.110243	0.395747	0.0680645	0.0407644	0.0376741	0.0250956	0.00688277	0.0110739	1.12732	1.08904	1.022	0.991466	1.03712	1.00597	1.06693	1.00865	1.07774	1.02006	1.03202	1.06617	1.05604	1.04221	1.0801	1.06836	1.04512	1.08804	0.301001	0.0514084	0.552145		S	2	___1	0.999999	1.80734e-12	176.49	142.23	165.24
A8JC49	35.2	not assigned.unknown	(original description: Flagellar associated protein OS=Chlamydomonas reinhardtii GN=FAP152 PE=4 SV=1)	0	0.922267	0.927207	0.919667	0.935784	0.839578	0.875426	1.01863	0.590844	0.684208	0.0579572	0.03498	0.0339365	0.0408137	0.0533953	0.0511017	0.904008	0.935626	0.884592	0.987155	0.957209	0.952338	0.875639	0.888786	0.922071	0.896472	0.901183	0.908346	0.93293	0.806629	0.816557	0.977949	0.81092	0.901377	0.71102	0.0538609	0.981331		S	2	___2	1	0.0124116	86.189	54.592	86.189
A8J6D1	1.1.1.1	PS.lightreaction.photosystem II.LHC-II	(chl4|517514 : 491.0) no description available & (q93wd2|cb29_chlre : 489.0) Chlorophyll a-b binding protein CP29 - Chlamydomonas reinhardtii & (at2g40100 : 247.0) Lhcb4:3 protein (Lhcb4.3, light harvesting complex of photosystem II; light harvesting complex photosystem II (LHCB4.3); CONTAINS InterPro DOMAIN/s: Chlorophyll A-B binding protein (InterPro:IPR001344); BEST Arabidopsis thaliana protei…	Cre17.g720250.t1.2	1.11648	0.993748	1.00988	1.03994	1.04705	0.93861	0.524282	1.40669	0.79386	0.0283023	0.0368542	0.0129082	0.0745785	0.0460073	0.112873	1.11085	0.96302	1.01506	1.09141	1.03461	1.0194	1.14717	0.983616	0.995191	1.06724	1.08379	1.01656	0.955554	0.995444	0.990098	1.09702	1.06191	0.809175	0.612388	0.054111	0.642157		T	3	___2	1	1.84198e-09	180.3	129.51	43.501
A8J6D1	1.1.1.1	PS.lightreaction.photosystem II.LHC-II	(chl4|517514 : 491.0) no description available & (q93wd2|cb29_chlre : 489.0) Chlorophyll a-b binding protein CP29 - Chlamydomonas reinhardtii & (at2g40100 : 247.0) Lhcb4:3 protein (Lhcb4.3, light harvesting complex of photosystem II; light harvesting complex photosystem II (LHCB4.3); CONTAINS InterPro DOMAIN/s: Chlorophyll A-B binding protein (InterPro:IPR001344); BEST Arabidopsis thaliana protei…	Cre17.g720250.t1.2	1.11648	0.993748	1.00988	1.03994	1.04705	0.961869	0.470288	1.6051	0.977852	0.0283023	0.0368542	0.0129082	0.0745785	0.0460073	0.0730188	1.11085	0.96302	1.01506	1.09141	1.03461	1.0194	1.14717	0.983616	0.995191	1.06724	1.08379	1.01656	0.955554	0.995444	0.990098	1.09702	1.06191	0.878949	0.612388	0.054111	0.749142		T	3	___2	1	6.31189e-29	203.74	140.94	43.501
A8J2L0	35.2	not assigned.unknown	(original description: Predicted protein OS=Chlamydomonas reinhardtii GN=CHLREDRAFT_149734 PE=4 SV=1)	Cre03.g152150.t1.2	1.14016	0.979923	1.03462	1.00685	0.971756	0.948933	0.972846	0.731655	0.290083	0.0372028	0.102539	0.0152626	0.137231	0.108877	0.0894312	1.1678	1.05337	1.02318	1.09786	1.02362	1.02872	1.15481	0.862774	1.05195	1.08218	1.04483	0.845669	0.848456	0.846623	1.00117	1.08992	1.02381	0.999959	0.349795	0.0554233	0.877562		T	3	___1	0.818091	7.43738e-07	112.82	79.055	51.029
A8ICF1	13.2.5.2	amino acid metabolism.degradation.serine-glycine-cysteine group.glycine	(chl4|509692 : 646.0) no description available & (gnl|cdd|36582 : 349.0) no description available & (gnl|cdd|32191 : 319.0) no description available & (at3g04520 : 228.0) Encodes a threonine aldolase, involved in threonine degradation to glycine. Expressed in vascular tissue through out the plant.; threonine aldolase 2 (THA2); CONTAINS InterPro DOMAIN/s: Pyridoxal phosphate-dependent transferase,…	Cre10.g423550.t1.1	1.06399	0.993587	1.12685	0.966702	1.01118	0.957019	1.04612	0.113263	0.568929	0.00886355	0.138709	0.0379537	0.104543	0.133723	0.0730184	1.05594	1.02655	1.1681	1.07349	1.11284	1.11901	1.06254	0.841366	1.09342	1.05251	1.10196	0.966036	0.997325	0.857617	1.02511	0.850268	1.07396	0.879911	0.500623	0.057734	0.576067		S	2	___2	0.983774	0.00489501	77.185	24.93	71.548
A8J0B1	35.2	not assigned.unknown	(original description: Low-CO2-inducible protein OS=Chlamydomonas reinhardtii GN=LCI9 PE=4 SV=1)	Cre09.g394473.t1.1	0.979202	1.07154	0.92515	1.10986	1.0784	1.09981	1.62396	0.328111	0.602247	0.0908778	0.0129434	0.184774	0.0171211	0.020912	0.0192798	1.03734	1.06244	1.13583	0.874478	1.06584	0.849015	1.02579	1.08636	0.790608	1.10236	1.07193	1.0802	1.12945	1.10179	1.10048	1.09777	1.0615	1.11874	0.848621	0.0589635	0.244417		S	2	___1	1	1.53656e-07	142.39	88.796	85.672
A8IFZ1	35.2	not assigned.unknown	(original description: Flagellar associated protein (Fragment) OS=Chlamydomonas reinhardtii GN=FAP55 PE=4 SV=1)	Cre03.g161550.t1.2	0.978618	1.00252	0.950198	1.05673	1.03427	1.09188	2.72904	0.00407348	0.837285	0.0687753	0.0172489	0.0711742	0.0169377	0.024726	0.032631	0.987099	0.984157	0.868137	0.905996	1.00501	0.987328	1.04276	1.01838	0.995129	1.03926	1.0623	1.0552	1.07308	1.02494	1.11768	1.05784	1.01556	1.10276	0.056353	0.0596057	0.236019		T	2	___1	0.999958	1.50073e-09	152.66	116.95	134.02
A8I5A5	35.2	not assigned.unknown	(original description: Predicted protein OS=Chlamydomonas reinhardtii GN=CHLREDRAFT_167612 PE=4 SV=1)	0	1.08657	1.02156	0.985378	0.942558	0.887639	0.865978	3.63131	1.37604	0.0335359	0.0301293	0.0269018	0.0156885	0.0953287	0.0666929	0.048127	1.08766	1.05194	0.987365	1.05592	1.00076	0.96879	1.11614	1.01197	0.999978	1.05122	0.833145	0.830708	0.903463	0.962011	0.920805	0.872993	0.867761	0.846422	0.156298	0.0608063	0.00881544		S	3	___2	0.997513	0.00354359	51.348	30.457	51.348
A8JI39	35.2	not assigned.unknown	(original description: Predicted protein (Fragment) OS=Chlamydomonas reinhardtii GN=CHLREDRAFT_195087 PE=4 SV=1)	0	0.95842	0.946138	0.936166	0.908338	0.978805	1.0104	0.254441	0.240035	0.532685	0.134599	0.00907405	0.00884811	0.088668	0.0156909	0.00995982	1.1131	0.95232	0.934244	0.894185	0.935721	0.928437	0.867971	0.950374	0.945817	0.807866	0.964216	0.999919	0.941518	0.995404	1.01154	0.975631	0.976795	1.01974	0.406645	0.0625457	0.0848922		S	2	___1	0.963197	1.18482e-06	152.32	126.24	119.46
A8JEV1	1.1.1.2	PS.lightreaction.photosystem II.PSII polypeptide subunits	(p12852|psbq_chlre : 224.0) Oxygen-evolving enhancer protein 3, chloroplast precursor (OEE3) - Chlamydomonas reinhardtii & (chl4|525487 : 224.0) no description available & (gnl|cdd|69290 : 167.0) no description available & (ipr008797 : 139.1227) Photosystem II PsbQ, oxygen evolving complex (original description: Oxygen evolving enhancer protein 3 OS=Chlamydomonas reinhardtii GN=PSBQ PE=4 SV=1)	Cre08.g372450.t1.2	0.899119	1.05556	1.06286	1.11842	1.00186	0.865858	0.0633923	0.169507	1.37123	0.01131	0.173741	0.029913	0.200083	0.148525	0.0598028	0.911868	1.19311	1.04303	0.895196	1.11327	1.04827	0.890293	0.86031	1.09726	1.22452	1.13388	0.926715	0.887631	0.841045	0.807169	1.2431	1.03065	0.863689	0.722396	0.0648977	0.507196		Y	3	___2	0.99237	0.0141524	64.136	35.958	64.136
Q8LSZ7	20.1.5	stress.biotic.regulation of transcription	(chl4|520638 : 1164.0) no description available & (gnl|cdd|30665 : 324.0) no description available & (at1g54130 : 249.0) RELA/SPOT homolog 3 (RSH3); FUNCTIONS IN: GTP diphosphokinase activity; INVOLVED IN: guanosine tetraphosphate metabolic process; LOCATED IN: chloroplast; EXPRESSED IN: 25 plant structures; EXPRESSED DURING: 15 growth stages; CONTAINS InterPro DOMAIN/s: Metal-dependent phosphohy…	Cre03.g159800.t1.1	0.937597	0.871097	0.811778	1.00242	0.980156	0.953186	6.04413	3.76543	1.26574	0.0451146	0.010262	0.0220445	0.0134269	0.0255025	0.00935976	0.901522	0.86024	0.836954	0.923088	0.872415	0.795935	0.988181	0.880636	0.802446	0.997565	0.993433	0.96387	0.992102	0.950754	0.946432	1.0176	0.99628	0.949256	0.00539186	0.0667987	0.165904		S	2	___1	0.980481	3.08572e-07	173.64	115.4	121.9
A8I8Q8	35.2	not assigned.unknown	(original description: Predicted protein (Fragment) OS=Chlamydomonas reinhardtii GN=CHLREDRAFT_166376 PE=4 SV=1)	0	0.89537	0.944801	0.989809	0.881649	0.957184	0.956422	0.175455	1.25504	0.108094	0.00574711	0.0991472	0.0392963	0.0746549	0.0392904	0.0120616	0.892273	1.01521	1.01487	0.891836	0.831416	0.944519	0.902002	0.987779	1.01004	0.851593	0.911826	0.961479	0.966648	0.979023	0.965133	0.826707	0.980704	0.942656	0.272793	0.0699098	0.429333		S	3	___1	0.93077	2.63557e-05	85.518	62.723	57.238
A8IE32	29.3.3	protein.targeting.chloroplast	(chl4|520970 : 1514.0) no description available & (q43715|toc75_pea : 309.0) Protein TOC75, chloroplast precursor (75 kDa translocon at the outer-envelope-membrane of chloroplasts) (Import intermediate associated protein of 75 kDa) (75 kDa chloroplast outer envelope protein) - Pisum sativum (Garden pea) & (loc_os03g16440.1 : 302.0) no description available & (at3g46740 : 300.0) Component of the t…	Cre03.g175200.t1.2	0.904325	0.941588	0.996656	0.829984	0.879535	0.935376	1.19809	1.10108	0.00748078	0.105247	0.084653	0.025654	0.0346063	0.0590458	0.0665725	1.02197	0.846805	0.96762	0.871879	0.968288	1.01626	0.819122	1.00967	1.00609	0.802773	0.848859	1.00186	0.818247	0.842142	0.868712	0.868933	0.947605	0.935561	0.485255	0.0719191	0.70369		T	2	___1	1	1.94747e-05	152.89	127.51	91.926
A8IGD9	35.2	not assigned.unknown	(original description: Low-CO2-inducible protein OS=Chlamydomonas reinhardtii GN=LCI5 PE=4 SV=1)	0	0.918132	1.07453	1.03664	0.945443	0.944182	0.990654	0.391329	0.345326	0.257538	0.0281925	0.0172236	0.141279	0.0709028	0.140084	0.210176	0.902361	1.07506	1.12995	0.901354	1.09148	1.10586	0.95068	1.05705	0.874095	0.999616	0.850992	0.862523	0.865195	0.876278	0.876223	0.97152	1.10528	1.23322	0.190856	0.0720534	0.196973		S	2	___2	0.868052	4.47763e-32	203.05	143.83	142.19
A8ID84	29.2.1.2.2.3	protein.synthesis.ribosomal protein.eukaryotic.60S subunit.L3	(chl4|509568 : 671.0) no description available & (gnl|cdd|35965 : 533.0) no description available & (p35684|rl3_orysj : 524.0) 60S ribosomal protein L3 OS=Oryza sativa subsp. japonica GN=RPL3 PE=2 SV=2 & (loc_os12g07010.1 : 524.0) no description available & (at1g43170 : 501.0) Encodes a cytoplasmic ribosomal protein.; ribosomal protein 1 (RP1); FUNCTIONS IN: structural constituent of ribosome; IN…	Cre10.g417700.t1.2	1.16718	1.17873	1.0533	0.963588	1.07923	0.852353	2.96908	1.99002	0.311201	0.0480611	0.107584	0.0724229	0.0404551	0.119004	0.0820102	1.22	1.24941	1.05902	1.15551	1.05491	1.12269	1.12603	1.23185	0.978186	0.944359	1.20794	0.84979	1.01007	0.973199	0.771655	0.936333	1.05655	0.935615	0.225071	0.0731362	0.180396		T	3	___1	1	0.00866339	53.585	30.147	47.808
A8J5N1	35.2	not assigned.unknown	(original description: Predicted protein OS=Chlamydomonas reinhardtii GN=CHLREDRAFT_192620 PE=4 SV=1)	0	0.984169	1.03557	1.14662	0.970147	0.947575	1.12559	0.276153	0.928295	0.0594783	0.0681434	0.161499	0.0577979	0.101127	0.146159	0.206581	1.0313	0.850541	1.08406	0.906036	1.10794	1.15777	1.01517	1.14822	1.19803	1.0191	0.861414	1.21142	0.853859	0.864979	0.889926	1.03748	1.11633	1.27541	0.750757	0.0731369	0.811536		S	2	___2	1	5.14541e-53	220.37	175.76	108.06
A8ICF1	13.2.5.2	amino acid metabolism.degradation.serine-glycine-cysteine group.glycine	(chl4|509692 : 646.0) no description available & (gnl|cdd|36582 : 349.0) no description available & (gnl|cdd|32191 : 319.0) no description available & (at3g04520 : 228.0) Encodes a threonine aldolase, involved in threonine degradation to glycine. Expressed in vascular tissue through out the plant.; threonine aldolase 2 (THA2); CONTAINS InterPro DOMAIN/s: Pyridoxal phosphate-dependent transferase,…	Cre10.g423550.t1.1	1.06399	1.09342	1.12685	1.03564	0.999154	0.98898	1.17648	0.0110771	0.227318	0.00886355	0.0595855	0.0379537	0.033261	0.154453	0.141395	1.05594	1.02655	1.1681	1.07349	1.11284	1.11901	1.06254	1.14088	1.09342	1.05251	1.10196	1.1088	0.997325	0.821541	1.02511	1.05708	1.07396	0.833025	0.932136	0.078102	0.242345		T	2	___2	0.999999	0.00489501	77.185	24.93	73.466
A8HUQ8	35.2	not assigned.unknown	(original description: Predicted protein OS=Chlamydomonas reinhardtii GN=CHLREDRAFT_206227 PE=4 SV=1)	0	0.959455	0.908551	0.839355	1.00129	0.996016	0.874624	0.77993	1.33918	0.0832496	0.158737	0.0735005	0.0392445	0.0114629	0.0443621	0.0557632	1.14274	0.823923	0.823034	0.865857	0.945304	0.884126	0.869774	0.956425	0.810905	1.01361	0.952583	0.819875	0.990947	0.994214	0.931349	0.999303	1.04125	0.872649	0.992491	0.0795341	0.235569		S	3	___1	0.931781	5.08239e-05	68.231	43.009	68.231
A8JD07	30.4	signalling.phosphinositides	(chl4|510797 : 1306.0) no description available & (at3g59770 : 119.0) Encodes a phosphoinositide phosphatase. The sac9 null mutant accumulates elevated levels of PtdIns(4,5)P2 and Ins(1,4,5)P3. The mutant plants have characteristics of constitutive stress responses.; SUPPRESSOR OF ACTIN 9 (SAC9); CONTAINS InterPro DOMAIN/s: WW/Rsp5/WWP (InterPro:IPR001202), Synaptojanin, N-terminal (InterPro:IPR0…	0	0.918069	0.950425	0.901249	0.94322	0.947565	1.00473	0.916701	0.127027	0.61713	0.0886236	0.0293139	0.0277928	0.0660985	0.0259066	0.0502595	0.871404	0.930938	0.924815	0.862528	0.936201	0.90833	1.02027	0.984138	0.8706	0.874163	0.941587	0.986733	0.9496	0.975938	1.0615	1.0059	0.925169	0.965939	0.542651	0.0801115	0.892111		S	2	___1	0.99992	0.000188983	137.32	113.49	137.32
A8JGD5	35.2	not assigned.unknown	(original description: Predicted protein OS=Chlamydomonas reinhardtii GN=CHLREDRAFT_179805 PE=4 SV=1)	0	1.07669	1.1583	0.926037	0.842139	1.03936	0.843036	1.76079	1.73265	0.307308	0.182671	0.0218997	0.135799	0.0358571	0.139778	0.0450757	1.18135	1.17963	0.851183	1.18295	1.13587	1.08279	0.865758	1.15938	0.844137	0.880961	1.14424	0.893825	0.810263	1.09317	0.827502	0.835192	0.880674	0.807782	0.521571	0.0804199	0.329541		S	2	___3	1	0.0110335	64.52	22.682	64.52
A8JGD5	35.2	not assigned.unknown	(original description: Predicted protein OS=Chlamydomonas reinhardtii GN=CHLREDRAFT_179805 PE=4 SV=1)	0	1.07734	1.1583	0.936366	0.808667	1.01349	0.811862	2.07078	1.52612	0.25754	0.181539	0.0218997	0.127408	0.0556273	0.18401	0.0362452	1.18135	1.17963	0.850815	1.18295	1.13587	1.08279	0.867719	1.15938	0.87549	0.767543	1.14424	0.853289	0.786496	1.09317	0.796306	0.871961	0.803072	0.785991	0.40024	0.0820246	0.213097		Y	2	___3	1	0.0110335	64.52	22.682	64.52
A8J9K6	35.2	not assigned.unknown	(original description: Predicted protein OS=Chlamydomonas reinhardtii GN=CHLREDRAFT_193208 PE=4 SV=1)	0	1.02164	1.06459	1.1285	0.913243	1.00921	0.882605	2.70466	0.52557	0.961858	0.0545333	0.0910489	0.024521	0.0954216	0.0951461	0.0496074	0.963886	0.967963	1.13321	1.07225	1.07701	1.15032	1.02878	1.14879	1.10196	0.876509	0.899444	0.857129	0.841647	1.06814	0.850913	1.02157	1.06004	0.939775	0.0652324	0.0832023	0.158875		S	3	___1	1	0.00126205	115.06	93.105	64.103
A8J5N1	35.2	not assigned.unknown	(original description: Predicted protein OS=Chlamydomonas reinhardtii GN=CHLREDRAFT_192620 PE=4 SV=1)	0	0.977353	1.0309	1.14662	0.967358	0.971908	1.10027	0.231638	0.686966	0.0197071	0.0798778	0.16953	0.0577979	0.105939	0.12515	0.250001	1.0313	0.836527	1.08406	0.885589	1.10794	1.15777	1.01517	1.14822	1.19803	1.0191	0.904014	1.21142	0.845492	0.895378	0.813963	1.03748	1.11633	1.27541	0.630501	0.0841938	0.811536		S	2	___2	0.999149	8.07175e-05	150.12	109.65	125.36
A8IPC1	35.2	not assigned.unknown	(original description: Flagellar associated protein OS=Chlamydomonas reinhardtii GN=FAP81 PE=4 SV=1)	0	0.911847	0.895774	0.934518	0.825497	0.885258	0.876629	2.47052	0.841262	0.888047	0.0217788	0.0294274	0.00497861	0.0421111	0.0395825	0.0267504	0.936508	0.862851	0.932555	0.903779	0.904954	0.930819	0.895253	0.919517	0.940178	0.82628	0.840114	0.902248	0.867211	0.90164	0.848875	0.783	0.91402	0.878764	0.178912	0.0847342	0.221152		Y	2	___1	0.99948	0.0259606	77.923	28.826	77.923
A8JGD5	35.2	not assigned.unknown	(original description: Predicted protein OS=Chlamydomonas reinhardtii GN=CHLREDRAFT_179805 PE=4 SV=1)	0	1.07166	1.1583	0.934359	0.808821	1.04172	0.846775	1.89424	1.72511	0.415606	0.19138	0.0218997	0.131341	0.0251465	0.135757	0.0559515	1.18135	1.17963	0.88709	1.18295	1.13587	1.08279	0.850673	1.15938	0.833195	0.780599	1.14424	0.846165	0.817016	1.09317	0.903029	0.828848	0.887761	0.791131	0.344878	0.0861312	0.365245		S	2	___3	1	0.0110335	64.52	22.682	64.52
A8JE94	35.1	not assigned.no ontology	(chl4|517976 : 608.0) no description available & (at1g56290 : 190.0) CwfJ-like family protein; CONTAINS InterPro DOMAIN/s: Cwf19-like, C-terminal domain-1 (InterPro:IPR006768), Cwf19-like protein, C-terminal domain-2 (InterPro:IPR006767); BEST Arabidopsis thaliana protein match is: CwfJ-like family protein / zinc finger (CCCH-type) family protein (TAIR:AT5G56900.2); Has 2474 Blast hits to 2009 pr…	0	0.930944	0.968801	0.994725	0.903036	0.903642	0.972164	1.27694	1.54161	0.231466	0.0347915	0.0487283	0.0277481	0.0204145	0.0557336	0.0285862	0.903031	0.914736	0.968983	0.969923	0.982335	1.02412	0.919879	1.00933	0.991075	0.924813	0.900009	0.979814	0.884332	0.961103	0.940531	0.899964	0.849813	0.996147	0.857428	0.0875616	0.316997		S	2	___1	0.999999	0.000805804	108.66	82.533	69.431
A8JE94	35.1	not assigned.no ontology	(chl4|517976 : 608.0) no description available & (at1g56290 : 190.0) CwfJ-like family protein; CONTAINS InterPro DOMAIN/s: Cwf19-like, C-terminal domain-1 (InterPro:IPR006768), Cwf19-like protein, C-terminal domain-2 (InterPro:IPR006767); BEST Arabidopsis thaliana protein match is: CwfJ-like family protein / zinc finger (CCCH-type) family protein (TAIR:AT5G56900.2); Has 2474 Blast hits to 2009 pr…	0	0.952356	0.968801	0.994725	0.903036	0.912293	0.972164	1.66464	1.41269	0.170356	0.0281573	0.0487283	0.0277481	0.0204145	0.0439739	0.0285862	0.967266	0.914736	0.968983	0.969923	0.982335	1.02412	0.919879	1.00933	0.991075	0.924813	0.900009	0.979814	0.884332	0.961103	0.940531	0.899964	0.875767	0.996147	0.628679	0.0875616	0.340726		S	2	___1	1	0.00170254	85.734	51.233	69.431
A8HNT4	35.2	not assigned.unknown	(original description: Predicted protein OS=Chlamydomonas reinhardtii GN=CHLREDRAFT_190192 PE=4 SV=1)	Cre14.g617100.t1.2	0.884535	0.920294	1.03944	0.803997	0.903033	0.873881	2.12876	1.74459	0.899761	0.0163132	0.106211	0.0103465	0.0430772	0.0750535	0.03158	0.897022	0.88373	1.03413	0.890504	1.03996	1.03282	0.866077	0.837194	1.05136	0.797967	0.848598	0.883867	0.849771	0.87185	0.89926	0.764252	0.988651	0.838515	0.15484	0.0876756	0.59421		T	3	___2	1	0.00444632	88.427	50.989	78.552
A8J6C3	2.2.2.3	major CHO metabolism.degradation.starch.glucan water dikinase	(chl4|517507 : 907.0) no description available & (q2qtc2|pwd_orysa : 493.0) Phosphoglucan, water dikinase, chloroplast precursor (EC 2.7.9.5) - Oryza sativa (Rice) & (loc_os12g20150.1 : 493.0) no description available & (at5g26570 : 388.0) chloroplastidic phosphoglucan, water dikinase (PWD) which is required for normal degradation of leaf starch in Arabidopsis. NMR analysis of the mutants, sugges…	0	0.937582	0.982678	0.985552	0.942333	1.02213	1.09208	0.543807	0.632071	0.184802	0.0810063	0.0931227	0.16256	0.109359	0.015091	0.0281257	0.914698	1.01032	1.0976	1.02757	0.878865	0.799107	0.870479	1.05885	1.05995	0.881711	1.00472	1.11915	1.06858	1.0313	1.063	0.87671	1.03038	1.0941	0.950829	0.08826	0.966986		S	2	___1	0.995097	4.54942e-109	243.37	171.59	153.06
A8IYY8	35.2	not assigned.unknown	(original description: Predicted protein OS=Chlamydomonas reinhardtii GN=CHLREDRAFT_148404 PE=4 SV=1)	Cre08.g385350.t1.1	1.03114	0.996857	1.02366	1.12763	0.985035	1.12536	0.792621	0.718085	0.322718	0.153847	0.0925606	0.0187107	0.0175131	0.0983388	0.064581	0.952184	0.914122	1.00883	0.932802	0.979628	1.01747	1.20843	1.09682	1.04468	1.12167	0.877436	1.05162	1.11388	1.00741	1.17184	1.14735	1.07026	1.15263	0.492916	0.088489	0.908219		S	2	___1	0.999993	1.07869e-55	204.32	152.34	204.32
A8J2I6	35.2	not assigned.unknown	(original description: Predicted protein (Fragment) OS=Chlamydomonas reinhardtii GN=CHLREDRAFT_149502 PE=4 SV=1)	0	0.915755	0.897346	0.994012	0.901775	0.956229	0.983082	0.0971679	0.484959	0.126188	0.0972939	0.091104	0.00371379	0.0639677	0.10752	0.133864	1.02684	1.00251	0.998243	0.845704	0.842331	0.992499	0.874716	0.847202	0.991293	0.838977	1.0019	0.9985	0.966852	1.03337	1.10857	0.899495	0.833413	0.842177	0.313661	0.0903815	0.398718		S	2	___1	0.938804	0.000449906	105.01	85.762	105.01
A8J8X3	29.4	protein.postranslational modification	(chl4|514950 : 566.0) no description available & (gnl|cdd|29142 : 234.0) no description available & (gnl|cdd|35255 : 165.0) no description available & (at2g45490 : 134.0) Encodes a member of a family of Ser/Thr kinases whose activities peak during cell division. Transcripts are abundant in tissues rich in dividing cells like roots and flowers but are low or absent in fully expanded leaves and ste…	0	0.994605	1.01592	1.03447	1.00801	0.912633	0.922112	1.32031	0.207806	0.66762	0.0324508	0.0178728	0.00236416	0.00390644	0.0835562	0.129977	0.966668	0.996278	1.03225	1.0302	1.02024	1.03696	0.986948	1.03123	1.03421	1.01212	0.999839	1.05294	1.00435	0.833281	0.920395	1.00756	0.90478	0.793002	0.402597	0.0913766	0.144071		S	2	___1	0.76723	0.00122441	110.15	55.428	110.15
A8IGD9	35.2	not assigned.unknown	(original description: Low-CO2-inducible protein OS=Chlamydomonas reinhardtii GN=LCI5 PE=4 SV=1)	0	0.911861	1.27636	1.25501	1.2642	1.5237	1.40663	0.826467	0.53109	0.0547107	0.0458115	0.357959	0.416575	0.393604	0.0279138	0.503055	0.952107	1.49064	1.49551	0.921469	0.863119	1.49554	0.862008	1.47532	0.773995	0.809864	1.55575	0.828238	1.48093	1.50468	1.74228	1.50181	1.51068	1.64938	0.461158	0.0916181	0.0838494		T	2	___1	0.989119	0.000184342	129.17	66.078	98
A8J576	29.2.1.2.1.27	protein.synthesis.ribosomal protein.eukaryotic.40S subunit.S27	(chl4|513463 : 159.0) no description available & (p47903|rs27_chlre : 154.0) 40S ribosomal protein S27 - Chlamydomonas reinhardtii & (at3g61110 : 148.0) Arabidopsis ribosomal protein; ribosomal protein S27 (RS27A); FUNCTIONS IN: structural constituent of ribosome; INVOLVED IN: translation, ribosome biogenesis; LOCATED IN: cytosolic small ribosomal subunit, cytosolic ribosome, ribosome, cell wall;…	Cre12.g529400.t1.2	1.16141	1.00781	0.99582	0.933165	1.01186	1.02228	0.694944	0.113545	0.99279	0.0176959	0.0309123	0.125665	0.175365	0.125158	0.0292736	1.14099	0.972592	1.0546	1.17098	1.02036	1.08132	1.17226	1.03046	0.851536	1.13536	1.03904	0.98962	0.841624	0.875345	1.04615	0.822513	1.12119	1.03108	0.983936	0.0919087	0.846379		S	2	___1	1	0.000793463	129.88	55.462	128.51
A8JA64	35.2	not assigned.unknown	(original description: Predicted protein OS=Chlamydomonas reinhardtii GN=CHLREDRAFT_193345 PE=4 SV=1)	0	1.13791	0.932455	0.940583	1.07039	1.06195	1.03588	0.510641	0.839765	0.58834	0.102005	0.115709	0.0784114	0.18194	0.0223344	0.0456732	1.24789	1.06533	1.00715	1.0464	0.853904	0.960455	1.11945	0.878131	0.854148	1.19618	1.07742	1.07159	1.15322	1.07208	1.05164	0.861773	1.03634	0.984417	0.925493	0.0950961	0.922609		S	3	___3	0.999996	1.64461e-22	110.44	78.215	66.419
A8JHN0	35.2	not assigned.unknown	(original description: Predicted protein OS=Chlamydomonas reinhardtii GN=CHLREDRAFT_195092 PE=4 SV=1)	Cre12.g561500.t1.2	1.05523	0.913936	1.04116	0.938853	1.02283	1.03605	0.0243303	0.192329	0.463953	0.194804	0.0966982	0.00661978	0.201507	0.0943705	0.0282363	0.92162	0.850526	1.0468	0.965318	0.866049	1.03387	1.27875	1.02523	1.04281	0.823714	1.07201	1.01196	1.17153	1.08245	1.02907	0.821316	0.914026	1.06712	0.769361	0.0952661	0.170415		S	2	___1	1	1.00808e-18	186.96	157.43	71.742
A8HQJ3	35.2	not assigned.unknown	(original description: Predicted protein (Fragment) OS=Chlamydomonas reinhardtii GN=CHLREDRAFT_146548 PE=4 SV=1)	0	0.9973	0.883198	1.00954	0.941953	0.902464	0.903311	0.687612	0.680951	0.42339	0.0790351	0.0151015	0.0416288	0.137419	0.0698059	0.0436812	0.906357	0.898383	0.97571	1.04937	0.868182	1.05603	1.03617	0.883029	0.996875	0.999237	0.896218	0.861362	0.785159	0.83599	0.900032	1.04146	0.975183	0.948539	0.877915	0.0972992	0.775256		S	2	___1	0.902674	0.000523736	100.58	76.894	100.58
A8J6H8	29.3.2	protein.targeting.mitochondria	(chl4|517566 : 893.0) no description available & (gnl|cdd|37278 : 360.0) no description available & (p29677|mppa_soltu : 289.0) Mitochondrial-processing peptidase alpha subunit, mitochondrial precursor (EC 3.4.24.64) (Alpha-MPP) (Ubiquinol-cytochrome-c reductase subunit II) (EC 1.10.2.2) - Solanum tuberosum (Potato) & (loc_os05g44916.1 : 289.0) no description available & (at1g51980 : 263.0) Insul…	Cre17.g722800.t1.2	0.895689	1.02794	1.05441	1.04799	1.07546	1.1497	1.80877	1.51119	0.307897	0.0291514	0.0110898	0.0104011	0.171313	0.0317797	0.0384103	0.929347	1.04019	1.06239	0.879275	1.01859	1.05819	0.878444	1.02504	1.04265	1.09014	1.10779	1.10788	1.1943	1.04426	1.18339	0.85954	1.07432	1.15784	0.0930523	0.0993166	0.662033		T	2	___2	0.999996	0.00401904	82.578	47.658	82.578
A8J6H8	29.3.2	protein.targeting.mitochondria	(chl4|517566 : 893.0) no description available & (gnl|cdd|37278 : 360.0) no description available & (p29677|mppa_soltu : 289.0) Mitochondrial-processing peptidase alpha subunit, mitochondrial precursor (EC 3.4.24.64) (Alpha-MPP) (Ubiquinol-cytochrome-c reductase subunit II) (EC 1.10.2.2) - Solanum tuberosum (Potato) & (loc_os05g44916.1 : 289.0) no description available & (at1g51980 : 263.0) Insul…	Cre17.g722800.t1.2	0.896215	1.02794	1.05441	1.0709	1.07546	1.1497	2.58031	1.80891	0.668119	0.0220835	0.0110898	0.0104011	0.134061	0.0317797	0.0384103	0.920196	1.04019	1.06239	0.876718	1.01859	1.05819	0.891729	1.02504	1.04265	1.09014	1.10779	1.10788	1.1943	1.04426	1.18339	0.928257	1.07432	1.15784	0.101643	0.100056	0.46121		Y	2	___2	0.946992	0.00401904	82.578	47.658	63.754
A8IDQ4	35.2	not assigned.unknown	(original description: Predicted protein OS=Chlamydomonas reinhardtii GN=CHLREDRAFT_143829 PE=4 SV=1)	0	1.06629	1.0093	0.967496	1.08726	1.00102	0.910813	0.21756	2.25305	0.275522	0.0991363	0.007491	0.0234249	0.0149339	0.038076	0.0926326	1.1109	1.00502	0.990406	0.952691	1.00493	0.943588	1.13529	1.01795	0.968495	1.08765	0.957438	0.813176	1.07214	1.01779	0.99746	1.102	1.02783	0.921804	0.400076	0.102077	0.761713		S	2	___1	0.995997	5.97949e-14	132.62	87.181	80.362
A8IBG5	35.2	not assigned.unknown	(original description: Predicted protein OS=Chlamydomonas reinhardtii GN=CHLREDRAFT_186236 PE=4 SV=1)	0	0.952436	1.17322	1.06858	1.03666	1.13584	1.25195	0.838023	1.54673	0.64307	0.0720609	0.0258321	0.185234	0.151867	0.0245945	0.0408098	0.956601	1.1999	1.17063	0.878383	1.14833	0.854767	1.02232	1.17142	1.18035	1.09503	1.16424	1.20562	1.15069	1.12107	1.28255	0.864271	1.12223	1.26769	0.610376	0.10284	0.771507		S	2	___1	0.999998	1.48006e-05	150.36	98.507	150.36
A8IVU6	35.2	not assigned.unknown	(original description: Voltage-gated Ca2+ channel, alpha subunit OS=Chlamydomonas reinhardtii GN=CAV8 PE=4 SV=1)	0	1.07965	0.934172	0.962246	0.950779	1.062	1.01584	0.120893	0.0332107	0.71683	0.0404156	0.123379	0.145617	0.17392	0.0171926	0.118552	1.03325	1.0726	1.13015	1.09852	0.835783	0.870496	1.10718	0.894136	0.886093	0.840441	1.07424	0.890769	1.15127	1.06942	1.12657	0.86063	1.04234	1.03017	0.133571	0.103058	0.877967		S	2	___1	0.984198	0.000223835	108.9	36.296	95.618
A8INH1	35.2	not assigned.unknown	(chl4|523946 : 496.0) no description available & (at4g32630 : 112.0) ArfGap/RecO-like zinc finger domain-containing protein; FUNCTIONS IN: ARF GTPase activator activity, zinc ion binding; INVOLVED IN: regulation of ARF GTPase activity; LOCATED IN: cellular_component unknown; EXPRESSED IN: 18 plant structures; EXPRESSED DURING: 10 growth stages; CONTAINS InterPro DOMAIN/s: Arf GTPase activating pr…	0	1.11444	1.0409	0.96347	1.09492	1.04523	1.10413	0.68309	0.752632	0.915907	0.0719312	0.0393102	0.138988	0.0149661	0.015958	0.00907096	1.19267	0.999883	1.01872	1.05116	1.04458	1.06634	1.09949	1.07825	0.805352	1.09256	1.0282	1.10709	1.11093	1.05985	1.09395	1.08128	1.04763	1.11135	0.93728	0.104394	0.424457		S	3	___2	0.958226	3.47029e-15	99.319	75.043	80.554
A8JA64	35.2	not assigned.unknown	(original description: Predicted protein OS=Chlamydomonas reinhardtii GN=CHLREDRAFT_193345 PE=4 SV=1)	0	1.13791	0.926858	0.947391	1.06895	1.06195	1.03588	0.494895	0.812863	0.596816	0.102005	0.122928	0.0672462	0.184417	0.0223344	0.0456732	1.24789	1.06533	1.00715	1.0464	0.830597	0.960455	1.11945	0.884646	0.874572	1.19618	1.07742	1.07159	1.15322	1.07208	1.05164	0.857453	1.03634	0.984417	0.925493	0.104416	0.998808		S	3	___3	0.999999	2.70889e-14	89.445	75.782	66.419
A8J3V2	35.2	not assigned.unknown	(original description: Predicted protein OS=Chlamydomonas reinhardtii GN=CHLREDRAFT_174609 PE=4 SV=1)	0	1.16029	1.04301	0.978255	1.0765	1.0697	0.919926	0.464229	1.89794	0.300515	0.0563818	0.00943745	0.110593	0.117071	0.0303292	0.10464	1.19345	1.03291	0.850726	1.09519	1.05161	1.04777	1.19222	1.04452	1.03627	1.08471	1.06347	0.849154	0.955538	1.04297	0.8705	1.18925	1.10266	1.04012	0.84116	0.105481	0.782407		S	2	___1	0.985592	6.12257e-37	205.95	161.43	178.99
A8JA64	35.2	not assigned.unknown	(original description: Predicted protein OS=Chlamydomonas reinhardtii GN=CHLREDRAFT_193345 PE=4 SV=1)	0	1.13791	0.915445	0.931319	1.05734	1.06195	1.03588	0.496484	0.701268	0.626221	0.102005	0.130524	0.0938514	0.204398	0.0223344	0.0456732	1.24789	1.06533	1.00715	1.0464	0.826807	0.960455	1.11945	0.854199	0.826355	1.19618	1.07742	1.07159	1.15322	1.07208	1.05164	0.822632	1.03634	0.984417	0.925493	0.10596	0.904699		S	3	___3	1	1.13444e-11	74.146	48.328	66.419
A8HYP5	35.2	not assigned.unknown	(original description: Intraflagellar transport protein 43 OS=Chlamydomonas reinhardtii GN=IFT43 PE=2 SV=1)	0	0.904357	0.925036	0.990645	0.84452	0.90978	0.934854	1.0601	1.51778	0.155749	0.0516908	0.0490245	0.02166	0.0371495	0.0473863	0.075054	0.935951	0.870278	0.978842	0.932415	0.939981	1.01564	0.844704	0.964848	0.97745	0.802183	0.855147	1.01865	0.871673	0.934471	0.873797	0.859702	0.939722	0.912119	0.641846	0.108009	0.630562		S	3	___2	0.999065	9.17919e-05	80.868	60.487	54.117
A8IGD9	35.2	not assigned.unknown	(original description: Low-CO2-inducible protein OS=Chlamydomonas reinhardtii GN=LCI5 PE=4 SV=1)	0	1.06378	1.20648	1.12162	1.08654	1.31152	1.26623	0.499752	0.59388	0.0731178	0.0543366	0.0483421	0.277693	0.0998453	0.0279148	0.332466	1.08116	1.25495	1.24683	1.00288	1.20621	0.803368	1.1073	1.15827	1.31466	1.13718	1.33295	1.36329	1.15092	1.32166	1.53937	0.97152	1.27995	0.896039	0.409397	0.108467	0.339042		S	2	___2	0.975965	1.26336e-141	259.27	190.23	86.258
A8J225	35.2	not assigned.unknown	(original description: Low-CO2-inducible protein (Fragment) OS=Chlamydomonas reinhardtii GN=LCI23 PE=4 SV=1)	Cre06.g281600.t2.1	0.894264	0.890635	0.912859	0.839728	0.940986	0.838484	0.769987	1.00183	1.49707	0.060295	0.0307136	0.0317712	0.0236705	0.0281994	0.0416657	0.9574	0.870353	0.877333	0.888108	0.925971	0.938549	0.837282	0.87558	0.922694	0.862038	0.956703	0.841868	0.814898	0.908431	0.795229	0.842247	0.957825	0.878354	0.758787	0.109748	0.751566		S	2	___2	1	9.49036e-51	217.2	191.15	160.46
A8IYI8	35.2	not assigned.unknown	(original description: Predicted protein OS=Chlamydomonas reinhardtii GN=CHLREDRAFT_206072 PE=4 SV=1)	Cre12.g551501.t1.1	0.864684	0.849975	0.88512	0.869049	0.884919	0.883587	0.303863	0.171248	0.166526	0.0150716	0.0357671	0.0524287	0.0292474	0.036587	0.0475984	0.88045	0.8777	0.927049	0.863182	0.862622	0.901975	0.85042	0.809603	0.826337	0.847757	0.888348	0.881829	0.856992	0.846738	0.836891	0.902397	0.919671	0.932039	0.332705	0.11127	0.00365901		S	2	___1	1	0.00121171	106.54	37.327	106.54
A8I0F0	35.2	not assigned.unknown	(original description: Ring3 protein OS=Chlamydomonas reinhardtii GN=CHLREDRAFT_182576 PE=4 SV=1)	Cre10.g455500.t1.2	1.19178	1.23512	1.24232	1.26383	1.23605	1.32027	2.01681	1.37271	0.842051	0.0462017	0.0163555	0.0270725	0.0278762	0.0119266	0.0563158	1.20349	1.24734	1.21119	1.14085	1.21654	1.25533	1.231	1.24147	1.26043	1.2352	1.23468	1.26005	1.29089	1.2486	1.37163	1.26539	1.22486	1.32914	0.227626	0.113914	0.412515		S	2	___1	1	1.77173e-158	267.23	237.59	243.37
A8JBI1	31.1	cell.organisation	(gnl|cdd|37954 : 280.0) no description available & (loc_os02g55630.1 : 270.0) no description available & (at1g15730 : 261.0) Cobalamin biosynthesis CobW-like protein; CONTAINS InterPro DOMAIN/s: Cobalamin (vitamin B12) biosynthesis CobW-like (InterPro:IPR003495), Cobalamin (vitamin B12) biosynthesis CobW-like, C-terminal (InterPro:IPR011629); BEST Arabidopsis thaliana protein match is: plastid tr…	0	0.889446	0.892451	0.902582	1.01428	0.977469	0.862808	2.53931	2.11183	2.65591	0.0257388	0.0377098	0.00525057	0.0191932	0.0578664	0.0204386	0.892141	0.933471	0.907193	0.862466	0.859289	0.903687	0.913731	0.884594	0.896867	0.994094	0.91584	0.841831	1.01645	0.985924	0.882662	1.0323	1.03064	0.863932	0.896442	0.114067	0.24334		S	2	___1	0.994403	8.27556e-24	137.73	83.382	114.21
A8IKK5	35.1.27	not assigned.no ontology.tetratricopeptide repeat (TPR)	(at1g77230 : 92.0) Tetratricopeptide repeat (TPR)-like superfamily protein; FUNCTIONS IN: binding; INVOLVED IN: biological_process unknown; EXPRESSED IN: 8 plant structures; EXPRESSED DURING: petal differentiation and expansion stage, D bilateral stage; CONTAINS InterPro DOMAIN/s: Tetratricopeptide-like helical (InterPro:IPR011990), Tetratricopeptide repeat-containing (InterPro:IPR013026), Tetrat…	0	0.95628	1.08811	0.99286	1.02693	0.959665	1.15881	0.428114	0.610962	1.56809	0.0670949	0.0132688	0.143175	0.0110332	0.1166	0.0459865	0.975517	1.10332	1.0624	0.881667	1.07893	0.828196	1.01165	1.08208	1.08798	1.01538	0.881919	1.11099	1.03736	1.09373	1.20272	1.02805	0.903343	1.16273	0.592846	0.114792	0.72982		T	2	___1	0.99974	1.19347e-116	245.18	209.83	245.18
A8I3H9	35.2	not assigned.unknown	(original description: Predicted protein (Fragment) OS=Chlamydomonas reinhardtii GN=CHLREDRAFT_141735 PE=4 SV=1)	0	1.09999	1.06059	1.02135	0.978561	1.02202	0.970539	1.78541	0.538937	0.420297	0.0205709	0.011664	0.0274417	0.114299	0.0329878	0.0409897	1.09525	1.06713	1.0064	1.0822	1.04712	1.00463	1.12252	1.06751	1.05302	1.00891	0.989944	1.01747	0.852151	1.02028	0.941786	1.07462	1.05585	0.952355	0.137788	0.117157	0.28695		S	2	___1	1	1.43096e-22	133.53	114.46	133.53
A8IPC9	18.3.2	Co-factor and vitamine metabolism.riboflavin.riboflavin synthase	(chl4|523820 : 409.0) no description available & (gnl|cdd|84418 : 266.0) no description available & (gnl|cdd|38520 : 131.0) no description available & (at2g20690 : 106.0) A synthetic gene encoding the catalytic domain of the Arabidopsis thaliana gene At2g20690 was recombinant expressed in E. coli demonstrating the molecular function of riboflavin synthase.; lumazine-binding family protein; FUNCTI…	Cre06.g296600.t1.2	0.95562	0.932347	0.983145	0.878098	0.878194	0.858832	1.93558	0.0463144	0.2154	0.0687055	0.0495585	0.0158836	0.0870583	0.0834239	0.0157721	0.985243	0.877363	0.967685	1.00454	0.946106	0.98233	0.877072	0.973572	0.999421	0.797384	0.855226	0.848917	0.866561	0.970696	0.850559	0.97035	0.80866	0.877019	0.0452215	0.119202	0.340646		T	2	___2	0.999591	0.0099365	60.246	18.766	60.246
A8J265	35.1.8	not assigned.no ontology.BSD domain-containing protein	(chl4|523555 : 437.0) no description available & (gnl|cdd|37901 : 97.8) no description available & (at1g03350 : 82.8) BSD domain-containing protein; FUNCTIONS IN: molecular_function unknown; INVOLVED IN: biological_process unknown; LOCATED IN: cellular_component unknown; EXPRESSED IN: 24 plant structures; EXPRESSED DURING: 15 growth stages; CONTAINS InterPro DOMAIN/s: BSD (InterPro:IPR005607); BE…	0	1.14008	0.965347	0.903616	1.00866	0.997901	1.06881	0.145299	0.415404	0.780262	0.122761	0.105868	0.106444	0.184364	0.150803	0.0228178	1.27991	1.03763	1.02652	1.04999	1.01458	0.840729	1.09035	0.843827	0.843603	0.796188	0.824182	1.05754	1.12638	1.07438	1.09507	1.10342	1.09514	1.05382	0.13066	0.121519	0.1315		S	3	___2	0.999497	1.79793e-18	126.16	102.69	126.16
A8HX08	35.2	not assigned.unknown	(original description: Predicted protein OS=Chlamydomonas reinhardtii GN=CHLREDRAFT_187136 PE=4 SV=1)	0	1.14054	0.996065	0.929413	0.828977	0.89908	0.992034	3.11863	0.29284	3.57823	0.0677749	0.0105511	0.0734658	0.008138	0.0852562	0.0224127	1.18903	0.985903	0.960648	1.0631	1.00697	0.982101	1.1695	0.995327	0.845491	0.820058	0.997175	0.998598	0.830877	0.84285	1.01043	0.835998	0.857214	0.967072	0.317867	0.122109	0.31669		S	3	___1	0.869533	3.85924e-09	97.771	59.612	51.39
A8I406	35.2	not assigned.unknown	(chl4|519123 : 284.0) no description available & (loc_os08g01840.1 : 106.0) no description available & (at2g02570 : 100.0) nucleic acid binding;RNA binding; FUNCTIONS IN: RNA binding, nucleic acid binding; INVOLVED IN: mRNA processing; LOCATED IN: nucleus, cytoplasm; EXPRESSED IN: 24 plant structures; EXPRESSED DURING: 14 growth stages; CONTAINS InterPro DOMAIN/s: Tudor subgroup (InterPro:IPR0183…	0	0.912491	0.906623	0.953781	0.865722	0.910659	0.909705	0.733578	0.55942	0.265831	0.0330412	0.056054	0.0315972	0.069776	0.0159883	0.0325079	0.936259	0.860893	0.925417	0.926453	0.969157	0.987837	0.874761	0.889819	0.948088	0.792695	0.914001	0.92384	0.872758	0.924712	0.932753	0.931714	0.893264	0.872523	0.559758	0.122459	0.866877		S	2	___1	1	0.00097322	121.13	100.34	121.13
A8ISX3	35.2	not assigned.unknown	(original description: Predicted protein OS=Chlamydomonas reinhardtii GN=CHLREDRAFT_145759 PE=4 SV=1)	0	1.13076	0.958718	0.885046	0.935774	0.851177	0.859037	4.28595	4.68469	2.10037	0.0141686	0.0211681	0.0537467	0.068096	0.0138998	0.0166693	1.14195	0.981902	0.923436	1.11483	0.94042	0.90808	1.13551	0.953833	0.823621	0.978917	0.836279	0.860542	0.857272	0.853457	0.874902	0.971133	0.863796	0.841666	0.191054	0.122888	0.470196		Y	2	___3	0.847409	0.0274665	45.083	6.3864	45.083
A8HVL2	35.2	not assigned.unknown	(original description: Predicted protein OS=Chlamydomonas reinhardtii GN=CHLREDRAFT_142067 PE=4 SV=1)	0	1.1046	1.00708	1.09783	1.0243	0.909593	0.865888	3.89756	1.98002	1.27568	0.00991778	0.0834898	0.0159728	0.0546421	0.0729726	0.027197	1.11078	0.917511	1.08048	1.09316	1.02099	1.11193	1.10986	1.08274	1.10108	0.962585	0.993723	0.840753	1.06653	0.871601	0.894761	1.04378	0.863454	0.862151	0.24351	0.123897	0.0453823		S	3	___1	1	0.00207835	80.411	53.586	58.824
A8IYV1	34.16	transport.ABC transporters and multidrug resistance systems	(chl4|513702 : 804.0) no description available & (gnl|cdd|35288 : 197.0) no description available & (q949g3|pdr1_nicpl : 174.0) Pleiotropic drug resistance protein 1 (NpPDR1) - Nicotiana plumbaginifolia (Leadwort-leaved tobacco) & (at2g29940 : 173.0) pleiotropic drug resistance 3 (PDR3); FUNCTIONS IN: ATPase activity, coupled to transmembrane movement of substances; INVOLVED IN: drug transmembran…	0	0.911336	0.900888	0.912183	0.863644	0.930293	0.872212	0.345331	0.202562	0.38864	0.0754582	0.0363702	0.0712753	0.0200096	0.0646146	0.0118306	0.986999	0.886968	0.974849	0.910926	0.873534	0.927055	0.836084	0.942163	0.834645	0.851857	0.972794	0.870773	0.886747	0.855936	0.861167	0.852327	0.962149	0.884697	0.355888	0.12424	0.583296		S	2	___1	0.92343	0.000198948	125.48	71.911	110.38
A8HQJ3	35.2	not assigned.unknown	(original description: Predicted protein (Fragment) OS=Chlamydomonas reinhardtii GN=CHLREDRAFT_146548 PE=4 SV=1)	0	1.04865	1.13477	1.01599	0.912404	1.09352	0.846599	1.64129	1.82285	0.307225	0.125127	0.0138985	0.133997	0.120618	0.0374571	0.0572137	0.904252	1.13006	0.861555	1.11645	1.12384	1.08502	1.12524	1.15041	1.1014	0.830806	1.05039	0.873525	0.855452	1.1123	0.885382	1.05095	1.11787	0.78089	0.682968	0.127213	0.242524		S	3	___1	0.999032	0.000308534	75.017	54.822	73.984
A8J225	35.2	not assigned.unknown	(original description: Low-CO2-inducible protein (Fragment) OS=Chlamydomonas reinhardtii GN=LCI23 PE=4 SV=1)	Cre06.g281600.t2.1	1.10348	0.946476	1.01571	0.949456	0.909109	0.933075	1.52739	0.867033	0.341667	0.0540751	0.0825358	0.026704	0.0396394	0.111333	0.11233	1.16402	0.917512	0.995985	1.05998	1.03959	1.00506	1.08644	0.882326	1.0461	0.991687	0.803655	1.05577	0.913053	1.02551	0.835282	0.943628	0.89816	0.908179	0.511779	0.127609	0.239282		S	2	___2	1	1.1211e-264	295.35	253.04	121.44
A8J265	35.1.8	not assigned.no ontology.BSD domain-containing protein	(chl4|523555 : 437.0) no description available & (gnl|cdd|37901 : 97.8) no description available & (at1g03350 : 82.8) BSD domain-containing protein; FUNCTIONS IN: molecular_function unknown; INVOLVED IN: biological_process unknown; LOCATED IN: cellular_component unknown; EXPRESSED IN: 24 plant structures; EXPRESSED DURING: 15 growth stages; CONTAINS InterPro DOMAIN/s: BSD (InterPro:IPR005607); BE…	0	1.14008	0.963026	0.888444	1.11341	1.00686	1.06881	0.722142	1.37534	0.632135	0.122761	0.109865	0.120103	0.0117663	0.135318	0.0228178	1.27991	1.03763	1.02652	1.04999	1.01458	0.830667	1.09035	0.836865	0.808149	1.11043	0.851073	1.05754	1.12638	1.07438	1.09507	1.10342	1.09514	1.05382	0.397389	0.127642	0.131068		S	3	___2	0.999512	2.99923e-06	77.907	60.112	77.907
A8JBY0	35.2	not assigned.unknown	(original description: Predicted protein (Fragment) OS=Chlamydomonas reinhardtii GN=CHLREDRAFT_152579 PE=4 SV=1)	0	1.00294	0.848487	0.866247	1.00234	0.888509	0.899065	0.425436	2.649	0.097522	0.0952478	0.0500359	0.0152481	0.0355671	0.0335237	0.0654321	1.06343	0.906264	0.882531	0.893148	0.819514	0.863902	1.05225	0.819684	0.852306	0.962116	0.867131	0.8308	1.01529	0.87125	0.961238	1.02962	0.927145	0.905158	0.405445	0.12765	0.60637		S	2	___1	1	0.00380322	89.877	66.501	78.501
A8J225	35.2	not assigned.unknown	(original description: Low-CO2-inducible protein (Fragment) OS=Chlamydomonas reinhardtii GN=LCI23 PE=4 SV=1)	Cre06.g281600.t2.1	0.90565	0.886879	0.912859	0.86122	0.940986	0.828355	0.755163	0.813364	1.72797	0.0485639	0.0339898	0.0317712	0.0219209	0.0281994	0.0480937	0.960815	0.870353	0.877333	0.886789	0.925971	0.938549	0.869347	0.864311	0.922694	0.886415	0.956703	0.863147	0.850735	0.908431	0.848443	0.846511	0.957825	0.773473	0.986178	0.12855	0.668581		S	2	___2	0.999828	0.000210141	124.42	102.91	113.4
A8JB67	29.2.2.3.1	protein.synthesis.ribosome biogenesis.Pre-rRNA processing and modifications.snoRNPs	(chl4|516886 : 236.0) no description available & (gnl|cdd|38377 : 143.0) no description available & (loc_os02g49610.1 : 110.0) no description available & (at5g08180 : 107.0) Ribosomal protein L7Ae/L30e/S12e/Gadd45 family protein; FUNCTIONS IN: RNA binding; EXPRESSED IN: 22 plant structures; EXPRESSED DURING: 13 growth stages; CONTAINS InterPro DOMAIN/s: H/ACA ribonucleoprotein complex, subunit Nh…	Cre16.g690500.t1.2	0.923091	0.953377	0.977291	0.953243	0.947742	1.03245	0.437288	0.784016	0.164316	0.106793	0.0460097	0.0214531	0.0671875	0.0258811	0.0484496	1.04609	0.96424	0.953037	0.869162	0.902907	0.985056	0.854015	0.992982	0.993781	0.876779	0.947007	0.982627	0.98011	0.973982	1.0794	1.00284	0.922235	1.03531	0.288131	0.130281	0.525149		S	2	___1	1	6.52234e-23	185.06	135.75	185.06
A8J225	35.2	not assigned.unknown	(original description: Low-CO2-inducible protein (Fragment) OS=Chlamydomonas reinhardtii GN=LCI23 PE=4 SV=1)	Cre06.g281600.t2.1	0.920999	0.998593	0.865088	0.868053	1.32885	1.27011	1.57916	1.07776	0.905234	0.0444223	0.294214	0.0153583	0.0142453	0.0787854	0.350418	0.943977	0.842678	0.88277	0.949226	0.815151	0.857426	0.869794	1.33795	0.855068	0.854071	1.41951	0.867983	0.882548	1.29002	1.51009	0.867542	1.27702	1.43225	0.450778	0.133197	0.500025		S	2	___1	0.974033	1.33161e-09	174.23	117.67	111.06
Q6SA05	1.3.13	PS.calvin cycle.rubisco interacting	(chl4|522260 : 818.0) no description available & (p23489|rca_chlre : 816.0) Ribulose bisphosphate carboxylase/oxygenase activase, chloroplast precursor (RuBisCO activase) (RA) - Chlamydomonas reinhardtii & (loc_os11g47970.1 : 511.0) no description available & (at2g39730 : 506.0) Rubisco activase, a nuclear-encoded chloroplast protein that consists of two isoforms arising from alternative splicing…	Cre04.g229300.t1.1	1.00042	0.979927	1.08617	1.07222	1.12185	1.16837	1.77006	0.910169	0.158515	0.10555	0.128477	0.0237984	0.0241375	0.0351879	0.0649249	1.11354	1.06615	1.10153	0.983148	1.04136	1.05876	0.904576	0.832267	1.09823	1.04535	1.15605	1.11481	1.07923	1.08575	1.24058	1.09208	1.12374	1.14971	0.757634	0.134952	0.0947902		S	2	___2	1	2.08836e-224	287.31	192.11	221.99
Q6SA05	1.3.13	PS.calvin cycle.rubisco interacting	(chl4|522260 : 818.0) no description available & (p23489|rca_chlre : 816.0) Ribulose bisphosphate carboxylase/oxygenase activase, chloroplast precursor (RuBisCO activase) (RA) - Chlamydomonas reinhardtii & (loc_os11g47970.1 : 511.0) no description available & (at2g39730 : 506.0) Rubisco activase, a nuclear-encoded chloroplast protein that consists of two isoforms arising from alternative splicing…	Cre04.g229300.t1.1	1.01091	0.983806	1.08617	1.07222	1.12185	1.16837	1.81124	0.941824	0.198095	0.0919472	0.121791	0.0237984	0.0241375	0.0351879	0.0649249	1.11354	1.06615	1.10153	0.983148	1.04136	1.05876	0.936049	0.843904	1.09823	1.04535	1.15605	1.11481	1.07923	1.08575	1.24058	1.09208	1.12374	1.14971	0.757634	0.134952	0.0999475		S	3	___2	1	0	344.29	289.12	146.67
A8IIK4	27.3.99	RNA.regulation of transcription.unclassified	(chl4|510026 : 765.0) no description available & (loc_os07g11110.1 : 279.0) no description available & (at3g63140 : 275.0) Encodes a protein with ribonuclease activity that is involved in plastid rRNA maturation.; chloroplast stem-loop binding protein of 41 kDa (CSP41A); FUNCTIONS IN: mRNA binding, poly(U) RNA binding; INVOLVED IN: rRNA processing; LOCATED IN: in 6 components; EXPRESSED IN: 25 pl…	Cre10.g440050.t1.2	0.900028	1.03104	0.935189	0.97662	1.16564	1.08462	1.18419	0.88809	0.0603052	0.0370551	0.118153	0.120923	0.143267	0.0451947	0.205914	0.92836	1.06779	1.06781	0.913629	1.12644	0.831045	0.858094	0.898873	0.906714	0.813079	1.12184	0.847352	1.0368	1.21211	1.21667	1.07998	1.16296	1.18983	0.434472	0.13509	0.00212793		S	2	___2	0.959423	0.000501421	139.31	56.881	123.69
A8HPI2	35.2	not assigned.unknown	(original description: Predicted protein OS=Chlamydomonas reinhardtii GN=CHLREDRAFT_189718 PE=4 SV=1)	0	0.91432	0.891763	0.907647	0.86028	0.921031	0.91373	0.140293	0.286133	0.774312	0.0233464	0.0031386	0.0174328	0.0242782	0.0502483	0.0635691	0.914304	0.893723	0.924226	0.937674	0.888143	0.88947	0.890981	0.893423	0.909246	0.878137	0.905063	0.877155	0.832636	0.880707	0.876902	0.870068	0.977323	0.987133	0.134869	0.1368	0.283389		S	2	___1	1	0.00100995	119.39	69.192	98.105
A8IIK4	27.3.99	RNA.regulation of transcription.unclassified	(chl4|510026 : 765.0) no description available & (loc_os07g11110.1 : 279.0) no description available & (at3g63140 : 275.0) Encodes a protein with ribonuclease activity that is involved in plastid rRNA maturation.; chloroplast stem-loop binding protein of 41 kDa (CSP41A); FUNCTIONS IN: mRNA binding, poly(U) RNA binding; INVOLVED IN: rRNA processing; LOCATED IN: in 6 components; EXPRESSED IN: 25 pl…	Cre10.g440050.t1.2	0.917701	1.0105	0.939566	0.99576	1.16564	1.07437	1.16964	0.605553	0.0611926	0.0217043	0.152858	0.112276	0.110607	0.0451947	0.223629	0.932555	1.06779	1.06781	0.927756	1.12644	0.858969	0.892793	0.837277	0.891922	0.870499	1.12184	0.816608	1.0368	1.21211	1.21667	1.07998	1.16296	1.18983	0.454021	0.138427	0.0020284		S	2	___2	0.99838	0.00328062	127.52	43.873	127.52
A8IWV0	27.3.26	RNA.regulation of transcription.MYB-related transcription factor family	(chl4|521436 : 1150.0) no description available & (at1g09770 : 510.0) Member of MYB3R- and R2R3- type MYB- encoding genes. Essential for plant innate immunity. Interacts with MOS4 and PRL1.; cell division cycle 5 (CDC5); FUNCTIONS IN: DNA binding, sequence-specific DNA binding transcription factor activity; INVOLVED IN: defense response signaling pathway, resistance gene-independent, defense resp…	0	0.933476	0.8725	0.837484	0.996228	0.863893	0.868891	0.512118	1.98224	0.246589	0.0620663	0.0287468	0.0964861	0.0151814	0.0614654	0.0365646	0.901878	0.880867	0.944148	0.893567	0.896134	0.812019	1.00498	0.840497	0.756284	1.01289	0.806139	0.827547	0.983187	0.928496	0.896976	0.992604	0.857043	0.882151	0.714774	0.138722	0.633307		T	2	___1	0.983239	3.74415e-06	151.7	97.419	92.457
A8IRV3	35.2	not assigned.unknown	(original description: Predicted protein (Fragment) OS=Chlamydomonas reinhardtii GN=CHLREDRAFT_145469 PE=4 SV=1)	0	1.10292	1.0903	1.08249	0.997631	1.09309	1.11474	0.341303	0.397017	0.714962	0.0514786	0.00275359	0.0477312	0.139362	0.0106049	0.0211259	1.15369	1.09317	1.08449	1.05076	1.08768	1.03379	1.10431	1.09006	1.12919	1.07407	1.08627	1.13294	1.08205	1.0877	1.09158	0.836775	1.10531	1.11971	0.676072	0.139702	0.399926		S	3	___1	1	1.26695e-08	80.711	63.919	80.711
A8IMV0	35.2	not assigned.unknown	(original description: Predicted protein OS=Chlamydomonas reinhardtii GN=CHLREDRAFT_183139 PE=3 SV=1)	Cre06.g307200.t1.2	1.02918	1.02763	1.04999	0.996081	1.08595	1.11498	0.832748	1.43958	0.956719	0.0730525	0.0163568	0.0399232	0.0281518	0.0120184	0.0449679	1.10882	1.02139	1.03267	0.965292	1.01531	1.02166	1.01342	1.04619	1.09565	0.963733	1.09979	1.07485	1.01503	1.07995	1.16358	1.00948	1.07812	1.10652	0.878209	0.140329	0.746721		S	2	___1	1	3.99113e-85	234.63	204.4	97.836
A8IV13	35.2	not assigned.unknown	(chl4|515553 : 687.0) no description available & (gnl|cdd|37244 : 166.0) no description available & (at5g16300 : 141.0) Vps51/Vps67 family (components of vesicular transport) protein; FUNCTIONS IN: molecular_function unknown; INVOLVED IN: biological_process unknown; LOCATED IN: cellular_component unknown; EXPRESSED IN: 23 plant structures; EXPRESSED DURING: 13 growth stages; CONTAINS InterPro DOM…	0	1.09376	1.092	1.07972	1.09936	1.02241	1.14997	0.020995	0.38932	0.533983	0.0538164	0.0406596	0.0146589	0.082301	0.142296	0.0227835	1.15395	1.13792	1.09463	1.07706	1.06057	1.06533	1.05028	1.07751	1.0792	1.10409	1.1408	1.14146	1.1792	1.06189	1.17579	1.0148	0.864545	1.13268	0.998264	0.140399	0.452434		S	2	___1	1	1.01865e-30	179.42	152.67	163.15
A8HQA6	35.2	not assigned.unknown	(original description: Predicted protein (Fragment) OS=Chlamydomonas reinhardtii GN=CHLREDRAFT_189858 PE=4 SV=1)	0	1.09996	1.00952	0.983569	0.893854	0.868898	0.892972	2.9762	0.511276	0.389467	0.0449241	0.0258776	0.0146006	0.107144	0.122772	0.042057	1.05083	1.02529	0.989533	1.11011	1.02361	0.96693	1.13894	0.979653	0.994243	0.827174	0.832049	0.938642	1.01744	0.768771	0.855838	0.836943	1.00588	0.884435	0.0182751	0.142569	0.14673		T	3	___1	0.994183	1.08739e-50	203.53	177.05	106.72
A8J2L0	35.2	not assigned.unknown	(original description: Predicted protein OS=Chlamydomonas reinhardtii GN=CHLREDRAFT_149734 PE=4 SV=1)	Cre03.g152150.t1.2	1.03189	1.17019	1.11355	1.08758	1.13128	1.20523	0.260592	0.469118	0.185091	0.178234	0.0534802	0.0226375	0.225475	0.0509332	0.0642781	0.952788	1.19898	1.08843	0.906902	1.10848	1.13236	1.23599	1.2031	1.11988	1.21823	1.18591	1.13133	1.21729	1.12281	1.24815	0.827226	1.08511	1.23622	0.262721	0.14347	0.332847		S	2	___1	1	1.83488e-78	222.3	179.49	216.15
Q65Z16	35.2	not assigned.unknown	(original description: NSG17 protein OS=Chlamydomonas reinhardtii GN=NSG17 PE=2 SV=1)	Cre14.g620850.t1.2	1.20588	1.0191	0.938493	1.07399	0.97938	0.856889	1.18344	2.77021	0.171925	0.0440056	0.0272466	0.0181583	0.201688	0.0387142	0.0407332	1.19854	0.988077	0.944217	1.166	1.03005	0.918162	1.25309	1.03916	0.953099	1.17165	0.941264	0.843678	0.842057	0.978208	0.824401	1.20825	1.01867	0.902588	0.66625	0.144926	0.774638		S	3	___1	0.999704	1.72687e-26	141.15	109.53	94.838
A8J424	35.2	not assigned.unknown	(original description: Predicted protein OS=Chlamydomonas reinhardtii GN=CHLREDRAFT_192241 PE=4 SV=1)	0	0.917156	0.9139	0.945409	0.848965	0.952267	0.922945	0.292899	0.660258	0.563894	0.0295843	0.0184018	0.0779993	0.0358994	0.0184286	0.0938917	0.944468	0.901334	0.855835	0.921271	0.935022	0.982051	0.88573	0.905345	0.99834	0.844311	0.967643	1.03017	0.81562	0.931839	0.883205	0.886965	0.957318	0.855458	0.480761	0.145725	0.550964		S	2	___1	0.992413	0.00470253	89.466	65.19	88.282
A8HP84	1.3.4	PS.calvin cycle.GAP	(p50362|g3pa_chlre : 620.0) Glyceraldehyde-3-phosphate dehydrogenase A, chloroplast precursor (EC 1.2.1.13) (NADP-dependent glyceraldehydephosphate dehydrogenase subunit A) - Chlamydomonas reinhardtii & (chl4|510829 : 620.0) no description available & (gnl|cdd|76080 : 507.0) no description available & (at1g42970 : 503.0) Encodes chloroplast localized glyceraldehyde-3-phosphate dehydrogenase that …	Cre01.g010900.t1.2	0.975904	0.955914	1.01692	0.96106	1.0446	0.966758	0.0981987	0.167651	0.721908	0.0650663	0.063848	0.0196696	0.0468459	0.0248791	0.113834	0.983264	0.973549	1.03895	1.03698	1.00909	1.01068	0.90747	0.885102	1.00113	1.01365	1.06464	0.977899	0.923799	1.01675	0.847763	0.945732	1.0524	1.07461	0.567633	0.146132	0.156156		S	2	___1	1	0.00733159	108.43	45.014	108.43
A8IUQ2	35.2	not assigned.unknown	no hits & (original description: Flagellar associated protein OS=Chlamydomonas reinhardtii GN=FAP138 PE=4 SV=1)	0	0.950294	0.978817	0.956078	1.00916	0.982801	1.03367	1.75414	0.138899	0.644257	0.0744119	0.0174321	0.034258	0.0207579	0.0130736	0.0144782	0.874926	0.994981	0.916889	0.952244	0.960347	0.971	1.02371	0.981122	0.980344	1.03205	0.985656	1.01721	0.991564	0.968536	1.03938	1.00385	0.994211	1.04442	0.0935511	0.147643	0.414933		T	2	___1	0.98795	0.00484728	105.25	79.358	105.25
A8JGW2	35.2	not assigned.unknown	(original description: Cytochrome b6f complex subunit V OS=Chlamydomonas reinhardtii GN=PETO PE=4 SV=1)	Cre12.g558900.t1.2	1.17043	1.04105	0.873867	0.893928	0.864929	0.854928	2.83798	1.89472	1.28811	0.0648706	0.0441329	0.0448364	0.151954	0.070244	0.0578427	1.2212	1.06351	0.851472	1.09734	0.990207	0.92549	1.19274	1.06944	0.844641	0.83633	0.795945	0.824156	0.779194	0.936368	0.921652	1.06626	0.862474	0.818976	0.103388	0.151864	0.400132		S	3	___1	0.955851	0.000307462	85.166	59.656	60.621
A8ITL3	35.2	not assigned.unknown	(original description: Fibrocystin-like protein (Fragment) OS=Chlamydomonas reinhardtii GN=CHLREDRAFT_171165 PE=4 SV=1)	0	1.02942	0.989865	0.994552	1.03156	1.0712	1.04641	0.594611	0.0136398	0.158426	0.0692292	0.136094	0.117578	0.0272456	0.00987408	0.0189031	0.950225	0.832732	1.04679	1.07845	1.06658	1.07696	1.05958	1.07028	0.859907	1.00786	1.05983	1.0527	1.0255	1.07754	1.02517	1.06133	1.07624	1.06137	0.204606	0.153864	0.366863		S	2	___2	0.996901	0.00217497	116.61	86.281	110.04
A8ITL3	35.2	not assigned.unknown	(original description: Fibrocystin-like protein (Fragment) OS=Chlamydomonas reinhardtii GN=CHLREDRAFT_171165 PE=4 SV=1)	0	1.04085	1.00622	0.982871	1.03156	1.0712	1.04641	0.543336	0.078788	0.198215	0.0496852	0.107761	0.137668	0.0272456	0.00987408	0.0189031	0.984523	0.881812	1.04679	1.07845	1.06658	1.07696	1.05958	1.07028	0.824863	1.00786	1.05983	1.0527	1.0255	1.07754	1.02517	1.06133	1.07624	1.06137	0.245242	0.153864	0.367686		S	3	___2	0.998148	0.00217497	116.61	86.281	70.335
A8I0F0	35.2	not assigned.unknown	(original description: Ring3 protein OS=Chlamydomonas reinhardtii GN=CHLREDRAFT_182576 PE=4 SV=1)	Cre10.g455500.t1.2	0.981407	0.902826	0.953272	0.994823	1.01969	1.02044	0.782336	0.0662631	0.188531	0.0541221	0.115451	0.122179	0.0591585	0.0371836	0.132069	0.918927	1.03489	1.00365	1.01382	0.852523	0.813959	1.01147	0.821061	1.04221	0.99282	1.03109	0.878531	0.936691	1.04984	1.13976	1.05496	0.97814	1.04303	0.765488	0.154621	0.410804		S	2	___2	1	1.75773e-06	130.69	109.31	128.36
A8HRL0	35.2	not assigned.unknown	(original description: Predicted protein OS=Chlamydomonas reinhardtii GN=CHLREDRAFT_168414 PE=4 SV=1)	0	0.943547	0.916989	0.912324	0.892945	1.05197	1.07327	0.774727	0.293963	0.556574	0.0126502	0.137346	0.122038	0.110666	0.0146436	0.193578	0.956985	1.07118	0.853826	0.931868	0.807762	1.0526	0.941789	0.872024	0.830548	0.871106	1.06491	0.851682	1.0129	1.05493	1.20951	0.794827	1.03607	1.15861	0.751347	0.155588	0.361156		S	2	___2	0.999782	7.75177e-30	201.16	163.5	201.16
A8IS98	35.2	not assigned.unknown	(original description: PRLI-interacting factor L OS=Chlamydomonas reinhardtii GN=LCI15 PE=4 SV=1)	Cre16.g685050.t1.1	0.983716	1.18746	0.96324	1.10929	1.06848	1.28179	1.13072	0.364812	1.63236	0.089866	0.00378981	0.178874	0.0135136	0.200337	0.0490188	0.92818	1.18341	0.852067	0.935572	1.19092	0.868073	1.0874	1.18805	1.16958	1.09553	1.19605	1.23316	1.1098	1.17182	1.33119	1.12255	0.837575	1.28102	0.159272	0.156682	0.637186		S	2	___1	0.999972	1.77704e-08	152.69	108.74	121.29
A8HWC5	35.2	not assigned.unknown	(original description: Predicted protein OS=Chlamydomonas reinhardtii GN=CHLREDRAFT_142161 PE=4 SV=1)	0	1.14482	1.04881	0.997744	0.920611	1.00661	0.863612	2.9529	1.45415	0.99974	0.0387525	0.0553177	0.0316109	0.14323	0.0158605	0.0154468	1.16461	1.038	0.984395	1.10017	0.999691	0.974997	1.16969	1.10873	1.03384	1.08581	0.988341	0.848933	0.83124	1.0146	0.879726	0.844779	1.01688	0.862176	0.369414	0.156723	0.0435681		S	2	___1	0.999924	2.41342e-14	184.44	145.81	182.92
Q93Z22	34.1	transport.p- and v-ATPases	(chl4|510431 : 2105.0) no description available & (gnl|cdd|35426 : 769.0) no description available & (at3g60330 : 627.0) H(+)-ATPase 7 (HA7); FUNCTIONS IN: hydrogen-exporting ATPase activity, phosphorylative mechanism; INVOLVED IN: cation transport, metabolic process, ATP biosynthetic process; EXPRESSED IN: 7 plant structures; EXPRESSED DURING: L mature pollen stage, M germinated pollen stage, 4 …	Cre10.g459200.t1.2	1.12729	1.16313	1.19684	1.0733	0.985408	0.970951	2.0816	0.0425639	0.446669	0.0600059	0.0440499	0.0453423	0.0420072	0.197888	0.120667	1.19553	1.16593	1.214	1.0828	1.11774	1.23111	1.10353	1.20571	1.14543	1.08332	0.768686	1.10949	1.10939	1.03105	0.914592	1.02719	1.15649	0.888775	0.137369	0.156866	0.198666		S	2	___1	0.999998	0.00328075	123.4	46.205	123.4
A8J225	35.2	not assigned.unknown	(original description: Low-CO2-inducible protein (Fragment) OS=Chlamydomonas reinhardtii GN=LCI23 PE=4 SV=1)	Cre06.g281600.t2.1	1.10348	1.04958	1.00866	1.01065	1.05153	1.02399	0.805926	0.846139	1.37727	0.0540751	0.0218577	0.0148164	0.0338194	0.0435795	0.0287095	1.16402	1.06016	0.995985	1.05998	1.06414	1.00506	1.08644	1.02445	1.02495	0.991687	1.10184	1.05577	0.990559	1.02551	0.999911	1.04969	1.02723	1.01631	0.706796	0.157278	0.567169		S	2	___2	1	4.02931e-84	231.42	205.43	206.85
Q9FED4	35.2	not assigned.unknown	(original description: CCM1-A OS=Chlamydomonas reinhardtii GN=CCM1 PE=2 SV=1)	Cre02.g096300.t1.1	0.95456	0.950304	0.879285	0.86026	0.862778	0.869037	1.11359	0.183239	0.2733	0.100737	0.0114168	0.0546609	0.115721	0.051485	0.0163992	0.891953	0.962436	0.838442	0.900963	0.939771	0.858032	1.07076	0.948706	0.94138	0.871192	0.830926	0.878764	0.73946	0.835233	0.878243	0.970127	0.922176	0.850103	0.391226	0.158403	0.25295		S	3	___1	0.999857	5.54427e-05	60.943	36.276	60.943
A8J8D7	35.2	not assigned.unknown	(original description: Predicted protein (Fragment) OS=Chlamydomonas reinhardtii GN=CHLREDRAFT_192775 PE=4 SV=1)	0	1.02865	1.02657	1.03434	1.03849	0.968444	1.09284	0.0375212	0.552579	0.442544	0.0776439	0.0288771	0.013039	0.0145097	0.134505	0.0497099	1.09634	1.00078	1.04592	0.943892	1.02115	1.03687	1.04571	1.05777	1.02021	1.04129	0.813681	1.03688	1.05139	1.03451	1.13191	1.02278	1.05714	1.10972	0.354636	0.158516	0.470321		S	2	___1	1	0.00027334	125.97	100.68	85.473
A8IGF0	13.1.6.1.5	amino acid metabolism.synthesis.aromatic aa.chorismate.shikimate kinase	(chl4|509955 : 633.0) no description available & (gnl|cdd|80535 : 163.0) no description available & (at2g21940 : 152.0) shikimate kinase 1 (SK1); FUNCTIONS IN: shikimate kinase activity, ATP binding; EXPRESSED IN: 19 plant structures; EXPRESSED DURING: 10 growth stages; CONTAINS InterPro DOMAIN/s: Shikimate kinase (InterPro:IPR000623); BEST Arabidopsis thaliana protein match is: shikimate kinase …	0	0.979109	0.89304	0.899838	0.926372	0.863734	0.877017	0.402465	0.538416	0.0226542	0.143919	0.0151764	0.021686	0.102433	0.0964391	0.0366135	1.0581	0.890964	0.922169	1.06623	0.909147	0.898483	0.812991	0.879008	0.878861	0.858188	0.799093	0.912411	0.876763	0.817525	0.879344	1.04416	0.974582	0.839295	0.173939	0.158766	0.209263		T	2	___1	0.872227	0.000888116	104.84	59.58	104.84
A8J225	35.2	not assigned.unknown	(original description: Low-CO2-inducible protein (Fragment) OS=Chlamydomonas reinhardtii GN=LCI23 PE=4 SV=1)	Cre06.g281600.t2.1	1.24138	1.15078	1.08469	1.14173	1.13239	1.03241	2.22823	3.8999	0.723159	0.0378838	0.0118322	0.0181381	0.0640556	0.0392043	0.0163732	1.26813	1.1379	1.09659	1.19803	1.16116	1.06382	1.25799	1.15329	1.09367	1.14811	1.16702	1.04804	1.07473	1.08983	1.03379	1.20236	1.14033	1.01539	0.504845	0.15946	0.539206		S	2	___1	1	4.02931e-84	231.42	205.43	206.85
A8IS98	35.2	not assigned.unknown	(original description: PRLI-interacting factor L OS=Chlamydomonas reinhardtii GN=LCI15 PE=4 SV=1)	Cre16.g685050.t1.1	1.15216	1.11586	1.03252	0.958915	0.947032	1.15903	0.914452	0.261447	1.51894	0.0508899	0.0284125	0.146881	0.128933	0.130455	0.0379005	1.20954	1.08954	1.13477	1.11251	1.11207	1.09859	1.13442	1.14599	0.864213	0.85778	1.08402	1.1505	0.914865	0.824275	1.12612	1.1041	0.932802	1.20047	0.298023	0.163466	0.810681		S	2	___1	0.962367	8.91883e-16	132.4	103.59	132.4
A8JH68	1.1.5.1	PS.lightreaction.other electron carrier (ox/red).plastocyanin	(p18068|plas_chlre : 187.0) Plastocyanin, chloroplast precursor (PC6-2) - Chlamydomonas reinhardtii & (chl4|521119 : 187.0) no description available & (gnl|cdd|84543 : 135.0) no description available & (loc_os06g01210.1 : 133.0) no description available & (at1g76100 : 119.0) One of two Arabidopsis plastocyanin genes. Expressed at 1/10th level of PETE2. Does not respond to increased copper levels …	Cre03.g182551.t1.2	1.55355	1.40715	1.40549	1.50158	1.46391	1.58161	1.38253	1.36689	1.85316	0.114869	0.0318813	0.0141446	0.0172928	0.0352648	0.0537076	1.6729	1.44354	1.38926	1.44376	1.38415	1.41197	1.54399	1.39375	1.41523	1.4866	1.49782	1.52312	1.49763	1.42744	1.6287	1.5205	1.46648	1.59301	0.994748	0.16379	0.272587		S	2	___1	1	9.10345e-14	182.72	146.72	157.7
A8IRA4	29.4	protein.postranslational modification	(chl4|517243 : 1027.0) no description available & (gnl|cdd|29142 : 215.0) no description available & (gnl|cdd|35803 : 196.0) no description available & (at1g78290 : 132.0) Protein kinase superfamily protein; FUNCTIONS IN: protein serine/threonine kinase activity, protein kinase activity, kinase activity, ATP binding; INVOLVED IN: response to karrikin; LOCATED IN: nucleus, cytoplasm; EXPRESSED IN:…	Cre17.g707650.t1.1	0.995595	0.979627	1.01091	0.991296	1.01025	1.07125	0.454769	0.43999	0.165689	0.0996088	0.0765873	0.024177	0.0280265	0.0532575	0.0626688	1.09986	1.03078	1.0387	0.901405	0.891575	0.999276	0.985523	1.01653	0.994742	0.992495	1.06082	0.999764	1.0187	0.95466	1.11672	0.96269	1.01526	1.09727	0.276128	0.163992	0.551184		T	2	___1	1	4.22825e-05	139.66	107.78	130.47
Q84QJ2	31.1	cell.organisation	(chl4|515499 : 651.0) no description available & (ipr020683 : 136.65103) Ankyrin repeat-containing domain & (gnl|cdd|35729 : 132.0) no description available & (gnl|cdd|29261 : 120.0) no description available & (loc_os02g09130.1 : 94.4) no description available & (at5g20350 : 83.2) Encodes a protein containing ankyrin and DHHC-CRD domain. Acts to restrict the size of the swelling that forms at the…	0	1.11128	1.05249	1.03807	1.09529	1.01498	1.03971	0.209073	0.668958	0.0483504	0.0520861	0.0467236	0.0455183	0.0122245	0.147551	0.0435528	1.16382	1.09052	1.02817	1.05966	1.06662	0.998319	1.11038	1.00033	1.08773	1.10924	1.11323	1.06243	1.08647	1.08641	1.0672	1.09015	0.845308	0.989493	0.985928	0.164135	0.310493		S	3	___3	0.916156	2.80484e-06	108.23	83.82	57.745
Q84QJ2	31.1	cell.organisation	(chl4|515499 : 651.0) no description available & (ipr020683 : 136.65103) Ankyrin repeat-containing domain & (gnl|cdd|35729 : 132.0) no description available & (gnl|cdd|29261 : 120.0) no description available & (loc_os02g09130.1 : 94.4) no description available & (at5g20350 : 83.2) Encodes a protein containing ankyrin and DHHC-CRD domain. Acts to restrict the size of the swelling that forms at the…	0	1.11128	1.05249	1.03807	1.09529	1.11656	1.03971	0.390457	1.31413	0.611593	0.0520861	0.0467236	0.0455183	0.0122245	0.0319428	0.0435528	1.16382	1.09052	1.02817	1.05966	1.06662	0.998319	1.11038	1.00033	1.08773	1.10924	1.11323	1.06243	1.08647	1.08641	1.0672	1.09015	1.15003	0.989493	0.985928	0.164135	0.865391		S	3	___3	0.999995	2.80484e-06	108.23	83.82	108.23
Q84QJ2	31.1	cell.organisation	(chl4|515499 : 651.0) no description available & (ipr020683 : 136.65103) Ankyrin repeat-containing domain & (gnl|cdd|35729 : 132.0) no description available & (gnl|cdd|29261 : 120.0) no description available & (loc_os02g09130.1 : 94.4) no description available & (at5g20350 : 83.2) Encodes a protein containing ankyrin and DHHC-CRD domain. Acts to restrict the size of the swelling that forms at the…	0	1.11128	1.05249	1.03807	1.09529	1.11656	1.03971	0.390457	1.31413	0.611593	0.0520861	0.0467236	0.0455183	0.0122245	0.0319428	0.0435528	1.16382	1.09052	1.02817	1.05966	1.06662	0.998319	1.11038	1.00033	1.08773	1.10924	1.11323	1.06243	1.08647	1.08641	1.0672	1.09015	1.15003	0.989493	0.985928	0.164135	0.865391		S	3	___3	0.999992	2.80484e-06	108.23	83.82	96.379
A8I893	10.1.10	cell wall.precursor synthesis.RHM	(chl4|518626 : 670.0) no description available & (at1g78570 : 446.0) Encodes a UDP-L-Rhamnose synthase involved in the biosynthesis of rhamnose, a major monosaccharide component of pectin. Catalyzes the conversion of UDP-D-Glc to UDP-L-Rha. The dehydrogenase domain of RHM1 was shown to catalyze the conversion of UDP-D-Glc to the reaction intermediate UDP-4-keto-6-deoxy-D-Glc using recombinant pro…	0	0.99188	0.913028	0.928934	0.899715	0.904864	0.854989	1.11902	0.448994	0.298051	0.0739146	0.0771583	0.0149651	0.0728308	0.0377083	0.0761703	1.04016	0.824425	0.936904	0.906788	0.965424	0.911671	1.02869	0.949235	0.938228	0.951527	0.946614	0.767156	0.816442	0.894692	0.90289	0.931176	0.873284	0.894922	0.629164	0.164749	0.0946075		T	3	___1	0.813785	0.000139815	69.259	48.891	69.259
A8IFQ9	35.2	not assigned.unknown	(chl4|520717 : 422.0) no description available & (loc_os01g01790.1 : 157.0) no description available & (at1g27510 : 141.0) FUNCTIONS IN: DNA binding, nuclease activity; INVOLVED IN: response to singlet oxygen; LOCATED IN: thylakoid membrane; EXPRESSED IN: 22 plant structures; EXPRESSED DURING: 13 growth stages; CONTAINS InterPro DOMAIN/s: Protein of unknown function DUF3506 (InterPro:IPR021894), …	0	1.08187	1.00007	0.973315	0.987798	1.05864	1.11306	0.444972	0.0210817	1.20838	0.0444204	0.0050118	0.139044	0.10696	0.0300287	0.0464109	1.11946	0.99882	1.05813	1.03285	0.9958	0.812849	1.09328	1.00559	1.04896	1.0578	1.09324	1.05993	1.04092	1.04333	1.14574	0.864676	1.03936	1.13349	0.769101	0.164791	0.679685		S	2	___1	0.983762	3.62211e-57	222.75	150.22	222.75
A8J864	35.2	not assigned.unknown	(original description: Predicted protein (Fragment) OS=Chlamydomonas reinhardtii GN=CHLREDRAFT_150908 PE=4 SV=1)	0	1.05026	0.987444	0.912342	1.04795	0.962827	0.914798	0.115988	2.31463	0.0419472	0.128575	0.0207448	0.0276517	0.0180003	0.00896325	0.0343489	1.15933	1.01062	0.937066	0.908491	0.97061	0.882482	1.08296	0.981103	0.917477	1.06195	0.953846	0.910698	1.02765	0.962861	0.951013	1.05427	0.971773	0.882683	0.490504	0.165125	0.743187		S	3	___1	0.954799	8.19843e-64	211.06	181.52	58.249
Q93WL4	1.1.1.1	PS.lightreaction.photosystem II.LHC-II	(chl4|521770 : 468.0) no description available & (p14273|cb2_chlre : 436.0) Chlorophyll a-b binding protein of LHCII type I, chloroplast precursor (CAB) (LHCP) - Chlamydomonas reinhardtii & (loc_os03g39610.1 : 355.0) no description available & (at3g27690 : 346.0) Encodes Lhcb2.4. Belongs to the Lhc super-gene family encodes the light-harvesting chlorophyll a/b-binding (LHC) proteins that constitu…	Cre04.g232104.t1.1	0.928831	0.986662	0.936084	1.04222	1.03038	1.08855	2.29714	0.130661	0.443534	0.030394	0.0423251	0.0815079	0.0315325	0.116132	0.0262724	0.934076	1.00618	1.00092	0.896156	0.9381	0.844583	0.956261	1.01571	0.962752	1.07257	1.11822	1.06002	1.00962	0.898715	1.11174	1.04446	1.07421	1.0939	0.0240694	0.165754	0.0173902		T	2	___1	0.999952	0.000674529	131.42	63.714	118.61
A8JDG6	27.1.1	RNA.processing.splicing	(chl4|517334 : 129.0) no description available & (loc_os02g54770.2 : 93.6) no description available & (at1g23860 : 89.7) Encodes a 9G8-like serine-arginine rich (SR) protein that interacts in vivo with U1-70K, a U1 small nuclear ribonucleoprotein 70-kDa protein that is involved in nuclear precursor mRNA processing.; RS-containing zinc finger protein 21 (RSZP21); CONTAINS InterPro DOMAIN/s: RNA re…	Cre17.g712000.t1.1	0.913578	1.02793	1.00286	0.832558	0.943481	0.954239	0.830673	0.905761	0.0264637	0.0853489	0.0324759	0.161347	0.0388836	0.118065	0.087122	1.00893	1.03295	0.822173	0.887467	1.0576	1.05389	0.844335	0.99323	1.13253	0.794236	1.07928	1.04464	0.87198	0.865199	0.947261	0.831458	0.885962	0.870816	0.879682	0.165896	0.207666		S	2	___3	1	0.00978981	105.03	72.778	105.03
A8J6C3	2.2.2.3	major CHO metabolism.degradation.starch.glucan water dikinase	(chl4|517507 : 907.0) no description available & (q2qtc2|pwd_orysa : 493.0) Phosphoglucan, water dikinase, chloroplast precursor (EC 2.7.9.5) - Oryza sativa (Rice) & (loc_os12g20150.1 : 493.0) no description available & (at5g26570 : 388.0) chloroplastidic phosphoglucan, water dikinase (PWD) which is required for normal degradation of leaf starch in Arabidopsis. NMR analysis of the mutants, sugges…	0	0.89953	0.913733	0.951202	0.831527	0.902044	0.981233	0.27531	1.62367	0.485331	0.0677224	0.0569323	0.0250104	0.0265242	0.0602867	0.0703069	0.975428	0.941517	0.922436	0.877886	0.951438	0.963364	0.845275	0.848243	0.967804	0.853073	0.97033	0.991487	0.839604	0.879618	0.906363	0.801903	0.856184	1.04585	0.867054	0.166952	0.87428		S	2	___2	0.995605	6.98513e-20	189.52	107.8	189.52
A8J006	34.7	transport.phosphate	(chl4|526026 : 1046.0) no description available & (at5g20380 : 333.0) Encodes an inorganic phosphate transporter (PHT4;5).; phosphate transporter 4;5 (PHT4;5); FUNCTIONS IN: inorganic phosphate transmembrane transporter activity; INVOLVED IN: transmembrane transport; LOCATED IN: plastid, membrane; EXPRESSED IN: 22 plant structures; EXPRESSED DURING: 13 growth stages; CONTAINS InterPro DOMAIN/s: M…	0	0.931687	1.11035	0.936921	0.95704	1.09363	1.19893	1.27928	1.62947	1.40246	0.0630812	0.0216772	0.136024	0.135116	0.0340768	0.0716377	0.925819	1.13525	1.09238	0.871745	1.10011	0.878636	0.997497	1.09568	0.839751	1.04366	1.13179	1.12077	1.02611	1.08283	1.26148	0.80135	1.06626	1.21453	0.531857	0.168448	0.743791		S	2	___1	0.998776	1.07472e-16	176.68	131.33	176.68
A8ID79	35.2	not assigned.unknown	(original description: Predicted protein OS=Chlamydomonas reinhardtii GN=CHLREDRAFT_186398 PE=4 SV=1)	0	0.906544	0.912987	0.908704	0.895352	0.945388	0.986527	0.625738	0.419701	0.379264	0.0406094	0.0655503	0.0788037	0.0812339	0.0140495	0.00398643	0.95165	0.960093	0.822765	0.872891	0.838125	0.977575	0.895089	0.940742	0.925771	0.804134	0.943614	0.986973	0.959893	0.96024	0.982337	0.922029	0.93231	0.990272	0.999248	0.169229	0.332763		S	2	___1	1	8.49106e-13	140.4	96.978	140.4
A8JHV8	35.2	not assigned.unknown	(original description: Flagellar associated protein (Fragment) OS=Chlamydomonas reinhardtii GN=FAP83 PE=4 SV=1)	0	0.916143	1.04752	0.980156	1.10454	1.08529	1.14613	2.45841	0.40749	0.647839	0.0749993	0.0018861	0.129384	0.0638655	0.0641285	0.0673739	0.981086	1.04603	1.04695	0.933286	1.04689	0.831026	0.834056	1.04964	1.06249	1.13044	1.11439	1.07022	1.0318	1.01177	1.19883	1.15139	1.1297	1.16934	0.0468276	0.170135	0.0884477		S	2	___1	0.999079	0.000221046	120.86	23.425	98.754
A8J6C3	2.2.2.3	major CHO metabolism.degradation.starch.glucan water dikinase	(chl4|517507 : 907.0) no description available & (q2qtc2|pwd_orysa : 493.0) Phosphoglucan, water dikinase, chloroplast precursor (EC 2.7.9.5) - Oryza sativa (Rice) & (loc_os12g20150.1 : 493.0) no description available & (at5g26570 : 388.0) chloroplastidic phosphoglucan, water dikinase (PWD) which is required for normal degradation of leaf starch in Arabidopsis. NMR analysis of the mutants, sugges…	0	0.894615	0.936188	0.951202	0.825845	0.90676	0.984603	0.477366	2.29524	0.726648	0.0512888	0.0185005	0.0250104	0.0358225	0.0573043	0.0649638	0.947652	0.941517	0.922436	0.890918	0.951438	0.963364	0.845275	0.915607	0.967804	0.827968	0.97033	0.991487	0.860559	0.890879	0.916471	0.789008	0.859071	1.04585	0.895328	0.171881	0.897539		T	2	___2	0.913842	9.68356e-08	124.2	79.121	124.2
A8JBE1	35.2	not assigned.unknown	(original description: DnaJ-like protein OS=Chlamydomonas reinhardtii GN=DNJ4 PE=4 SV=1)	0	0.940401	0.871541	0.903758	0.822486	0.839538	0.923142	1.29287	0.993932	1.32676	0.0590397	0.0396098	0.0439816	0.0317574	0.0533311	0.00554086	0.994872	0.878005	0.887209	0.948669	0.907521	0.953613	0.877664	0.829097	0.870451	0.797349	0.817253	0.929227	0.811933	0.900398	0.918388	0.858177	0.800965	0.921811	0.264597	0.172594	0.97542		S	2	___1	1	7.74687e-06	125.84	107.43	125.84
Q945T2	29.6	protein.folding	(chl4|524802 : 331.0) no description available & (loc_os02g39870.1 : 153.0) no description available & (at5g17710 : 145.0) embryo defective 1241 (EMB1241); FUNCTIONS IN: copper ion binding; INVOLVED IN: protein folding, embryo development ending in seed dormancy; LOCATED IN: thylakoid, chloroplast; EXPRESSED IN: 25 plant structures; EXPRESSED DURING: 14 growth stages; CONTAINS InterPro DOMAIN/s: …	Cre07.g341600.t2.1	1.37347	1.35003	1.29308	1.32772	1.40058	1.53219	0.899954	0.221538	1.01706	0.0808276	0.0265121	0.153287	0.168668	0.0429716	0.0702653	1.40623	1.3649	1.11618	1.2814	1.31942	1.38667	1.43277	1.36577	1.37639	1.13297	1.43606	1.45911	1.42284	1.3528	1.59926	1.42734	1.4129	1.53821	0.752104	0.17971	0.203794		S	2	___1	0.999955	2.46332e-297	314.35	291.37	314.35
A8JC49	35.2	not assigned.unknown	(original description: Flagellar associated protein OS=Chlamydomonas reinhardtii GN=FAP152 PE=4 SV=1)	0	0.905815	0.918853	0.879406	0.932397	0.90922	0.921263	0.438308	0.123292	0.22415	0.0166788	0.0234317	0.0499716	0.0594668	0.0447592	0.0530434	0.924744	0.943225	0.91044	0.899428	0.896491	0.82176	0.893274	0.916844	0.906018	0.933313	0.857774	0.899006	0.991401	0.939223	0.882974	0.872478	0.930665	0.981809	0.283941	0.180645	0.516918		S	2	___1	0.999988	0.000509746	117.52	67.48	91.937
A8HQY2	34.16	transport.ABC transporters and multidrug resistance systems	(chl4|511332 : 1130.0) no description available & (at3g54540 : 682.0) member of GCN subfamily; general control non-repressible 4 (GCN4); CONTAINS InterPro DOMAIN/s: ATPase, AAA+ type, core (InterPro:IPR003593), ABC transporter-like (InterPro:IPR003439), ABC transporter, conserved site (InterPro:IPR017871); BEST Arabidopsis thaliana protein match is: general control non-repressible 3 (TAIR:AT1G645…	0	0.873881	0.852895	0.911674	0.940719	1.05956	0.996548	2.00138	0.274906	0.497501	0.0275151	0.0237284	0.131123	0.107769	0.0132688	0.104622	0.869071	0.867639	0.868223	0.903484	0.865524	0.807792	0.849088	0.825523	1.05901	1.05597	1.07316	1.08687	0.923753	1.04665	0.881907	0.842439	1.05887	1.02087	2.20661e-05	0.180784	0.562998		S	3	___2	0.999947	1.35466e-06	84.674	58.174	58.812
A8IGD9	35.2	not assigned.unknown	(original description: Low-CO2-inducible protein OS=Chlamydomonas reinhardtii GN=LCI5 PE=4 SV=1)	0	1.15822	1.21374	1.2764	1.06297	0.968333	1.157	1.16414	0.415751	0.155519	0.0590169	0.0262497	0.0180896	0.197687	0.231441	0.247855	1.12787	1.18431	1.25728	1.22624	1.2222	1.29325	1.12056	1.23472	1.27867	1.12932	1.23431	0.870857	0.840643	0.812857	1.305	1.21894	0.857828	1.29514	0.38396	0.180808	0.57399		S	2	___2	0.939201	1.28953e-85	233.52	161.55	75.02
A8IWV0	27.3.26	RNA.regulation of transcription.MYB-related transcription factor family	(chl4|521436 : 1150.0) no description available & (at1g09770 : 510.0) Member of MYB3R- and R2R3- type MYB- encoding genes. Essential for plant innate immunity. Interacts with MOS4 and PRL1.; cell division cycle 5 (CDC5); FUNCTIONS IN: DNA binding, sequence-specific DNA binding transcription factor activity; INVOLVED IN: defense response signaling pathway, resistance gene-independent, defense resp…	0	1.04436	0.997465	1.02021	1.01663	0.994826	1.05702	0.0358669	0.588788	0.322987	0.097769	0.00408342	0.0207318	0.0191157	0.0313038	0.0260694	1.11607	1.00218	1.03458	0.932995	0.995074	0.996448	1.08403	0.995142	1.02961	1.02215	1.03041	1.0505	1.03239	0.982521	1.08573	0.995367	0.971544	1.03483	0.659416	0.182194	0.324398		T	2	___1	1	0.00237678	119.54	63.531	91.616
A8JIC4	35.2	not assigned.unknown	(original description: Predicted protein (Fragment) OS=Chlamydomonas reinhardtii GN=CHLREDRAFT_154885 PE=4 SV=1)	0	0.940861	0.901391	0.88981	0.869514	1.01815	0.896117	0.316275	1.05027	1.63993	0.0314851	0.0540598	0.088391	0.0114649	0.0421121	0.0407651	0.931759	0.877308	0.819269	0.975894	0.963307	0.988963	0.914929	0.863558	0.861199	0.880235	1.05294	0.901851	0.857428	0.971331	0.933711	0.870879	1.03017	0.852788	0.337556	0.182787	0.554221		T	2	___1	1	0.00215704	104.38	78.426	93.812
A8ISZ8	35.2	not assigned.unknown	(original description: Predicted protein OS=Chlamydomonas reinhardtii GN=CHLREDRAFT_189424 PE=4 SV=1)	0	1.0741	1.00305	0.92917	0.966935	0.941949	0.866535	1.32146	1.37794	0.0801133	0.093675	0.0170699	0.0643082	0.118138	0.0654828	0.038062	1.16435	1.00858	0.981953	1.08062	0.983897	0.857546	0.977339	1.01667	0.948013	1.06817	0.995539	0.823391	0.837133	0.868958	0.895363	0.995501	0.96135	0.880852	0.387881	0.184584	0.427084		S	3	___1	0.897658	1.05405e-05	64.035	45.538	64.035
A8JA82	35.2	not assigned.unknown	(original description: Predicted protein (Fragment) OS=Chlamydomonas reinhardtii GN=CHLREDRAFT_151979 PE=4 SV=1)	0	1.07233	0.983252	1.05433	0.967159	1.06036	1.05335	0.104628	0.168646	0.844029	0.080173	0.11933	0.0305272	0.0981865	0.0323374	0.0225486	1.16387	0.845499	1.05258	1.03848	1.05489	1.02471	1.01463	1.04937	1.08569	0.989206	1.08053	1.07798	1.05245	1.0775	1.04834	0.859823	1.02306	1.03372	0.784991	0.186824	0.264331		S	3	___1	1	1.14693e-06	75.068	51.326	75.068
A8J225	35.2	not assigned.unknown	(original description: Low-CO2-inducible protein (Fragment) OS=Chlamydomonas reinhardtii GN=LCI23 PE=4 SV=1)	Cre06.g281600.t2.1	1.03318	1.20351	1.15978	1.13861	0.93473	1.33548	0.0170159	0.700118	0.973107	0.212952	0.211786	0.28731	0.115017	0.0549063	0.0126036	0.948659	0.95999	0.828025	1.27542	1.30587	1.32746	0.875461	1.34467	1.32384	1.20041	0.956694	1.32823	1.0059	0.975255	1.35003	1.20951	0.872242	1.32817	0.0996192	0.187056	0.838216		S	2	___1	0.99969	2.10871e-68	218.83	155.14	71.592
Q6UKY5	35.2	not assigned.unknown	(original description: Acyl carrier protein OS=Chlamydomonas reinhardtii GN=ACP2 PE=2 SV=1)	Cre13.g577100.t1.2	0.957061	1.01604	0.992473	0.965688	0.906848	0.926736	0.75789	0.000426371	0.326822	0.0577811	0.0239431	0.0273643	0.0915057	0.101613	0.128412	1.02094	1.04367	0.966444	0.941797	1.00136	0.989975	0.908445	1.00309	1.021	0.87241	1.02414	1.05564	0.969342	0.845518	0.925746	1.05531	0.850886	0.798822	0.68884	0.189093	0.426233		S	2	___1	0.995007	4.40226e-09	125.03	96.267	82.859
A8JEL7	35.2	not assigned.unknown	(original description: Nucleosome assembly protein (Fragment) OS=Chlamydomonas reinhardtii GN=CHLREDRAFT_153433 PE=3 SV=1)	0	1.01037	1.05129	1.04559	0.966918	1.02094	1.10803	0.035761	0.702698	0.324168	0.0828032	0.0136659	0.0130437	0.164439	0.0507535	0.0302188	1.104	1.06703	1.05224	0.980345	1.04447	1.03056	0.946775	1.04238	1.05396	1.04597	1.07108	1.07332	1.0769	1.02213	1.12843	0.777882	0.969593	1.12236	0.569372	0.189681	0.61245		S	2	___1	0.999545	3.5888e-19	184.2	161.73	145.43
A8IWK7	35.2	not assigned.unknown	(original description: Predicted protein OS=Chlamydomonas reinhardtii GN=CHLREDRAFT_147368 PE=4 SV=1)	Cre03.g194150.t1.1	1.16217	1.16652	1.16527	1.18066	1.14849	1.19008	0.276213	0.341501	0.421449	0.0265	0.0373293	0.0133709	0.0256259	0.0312265	0.0257111	1.13449	1.17966	1.17261	1.18731	1.12439	1.17337	1.16471	1.19549	1.14984	1.15156	1.15496	1.16238	1.19985	1.17598	1.21318	1.19057	1.11454	1.19467	0.700287	0.189834	0.912755		S	2	___1	1	0.000191539	151.11	112.93	90.601
A8J6D1	1.1.1.1	PS.lightreaction.photosystem II.LHC-II	(chl4|517514 : 491.0) no description available & (q93wd2|cb29_chlre : 489.0) Chlorophyll a-b binding protein CP29 - Chlamydomonas reinhardtii & (at2g40100 : 247.0) Lhcb4:3 protein (Lhcb4.3, light harvesting complex of photosystem II; light harvesting complex photosystem II (LHCB4.3); CONTAINS InterPro DOMAIN/s: Chlorophyll A-B binding protein (InterPro:IPR001344); BEST Arabidopsis thaliana protei…	Cre17.g720250.t1.2	1.14491	1.11366	1.1627	1.03212	0.957509	0.949328	2.13894	0.161129	0.144378	0.0556928	0.044476	0.0125874	0.124221	0.155098	0.149323	1.20263	1.08649	1.17117	1.09149	1.08951	1.16869	1.1406	1.16499	1.14824	0.888686	0.780982	1.11979	1.10359	1.01962	0.84166	1.1041	1.07192	0.886529	0.102062	0.190623	0.12831		S	3	___1	1	1.95633e-13	160.52	116.14	115.38
A8HYL9	34.14	transport.unspecified cations	(chl4|522852 : 1382.0) no description available & (gnl|cdd|36495 : 261.0) no description available & (gnl|cdd|73247 : 234.0) no description available & (at5g47560 : 90.9) Encodes a tonoplast malate/fumarate transporter.; tonoplast dicarboxylate transporter (TDT); CONTAINS InterPro DOMAIN/s: Sodium/sulphate symporter (InterPro:IPR001898); Has 1807 Blast hits to 1807 proteins in 277 species: Archae…	0	0.954871	0.885209	0.999388	0.937651	0.876432	1.02479	0.00205906	1.68015	0.0688469	0.0244164	0.0908333	0.00602871	0.106487	0.0861275	0.0300484	0.946611	0.988672	1.00135	0.982346	0.848385	0.992623	0.935656	0.818571	1.00419	0.826368	0.832613	0.996496	1.03859	0.975658	1.05633	0.947999	0.821025	1.02156	0.182044	0.19167	0.899596		S	2	___1	0.947534	3.49168e-05	153.54	125.76	104.16
A8HYQ9	27.1.1	RNA.processing.splicing	(chl4|522838 : 404.0) no description available & (loc_os09g31482.3 : 301.0) no description available & (at5g42820 : 291.0) U2 auxiliary factor small subunit. The atU2AF35b protein and its homolog, atU2AF35a, contain most of the conserved domains of hsU2AF35, including the psiRRM, one RS domain, two zinc fingers, and the two regions for interacting with U2AF large subunit. Both proteins lack the s…	Cre06.g250950.t1.2	0.97727	0.959258	1.03185	1.08064	1.06498	0.966444	0.26785	0.022374	0.231561	0.0697559	0.186376	0.218243	0.0504248	0.163879	0.19693	0.949321	1.17127	1.16201	0.925823	0.821232	0.779888	1.05667	0.885277	1.15364	1.12392	1.19171	1.18869	1.09272	1.12331	0.813635	1.02527	0.879913	0.89701	0.384682	0.194605	0.342456		S	2	___1	0.988522	1.66601e-15	140.17	62.057	133.75
A8IVE5	28.1	DNA.synthesis/chromatin structure	(chl4|524158 : 1189.0) no description available & (gnl|cdd|35605 : 322.0) no description available & (at5g44800 : 213.0) chromatin remodeling 4 (CHR4); FUNCTIONS IN: in 6 functions; INVOLVED IN: chromatin assembly or disassembly, regulation of transcription; LOCATED IN: chromatin, nucleus; EXPRESSED IN: 24 plant structures; EXPRESSED DURING: 11 growth stages; CONTAINS InterPro DOMAIN/s: Protein o…	0	1.03793	1.08773	1.09656	1.12146	1.13126	1.14582	0.640111	0.120468	0.0313208	0.169803	0.15863	0.0334987	0.0105833	0.0245548	0.0471002	1.18646	1.19908	1.11552	1.07451	1.15801	1.05788	0.852816	0.906103	1.11628	1.12147	1.10478	1.13386	1.13204	1.13573	1.19774	1.11087	1.15327	1.10585	0.160801	0.195539	0.114043		S	3	___2	1	7.80317e-17	74.654	62.869	45.227
A8IVE5	28.1	DNA.synthesis/chromatin structure	(chl4|524158 : 1189.0) no description available & (gnl|cdd|35605 : 322.0) no description available & (at5g44800 : 213.0) chromatin remodeling 4 (CHR4); FUNCTIONS IN: in 6 functions; INVOLVED IN: chromatin assembly or disassembly, regulation of transcription; LOCATED IN: chromatin, nucleus; EXPRESSED IN: 24 plant structures; EXPRESSED DURING: 11 growth stages; CONTAINS InterPro DOMAIN/s: Protein o…	0	1.04686	1.05684	1.09656	1.12146	1.13126	1.14582	0.642299	0.0775297	0.0113506	0.155272	0.211801	0.0334987	0.0105833	0.0245548	0.0471002	1.18646	1.19908	1.11552	1.07451	1.15801	1.05788	0.879629	0.813424	1.11628	1.12147	1.10478	1.13386	1.13204	1.13573	1.19774	1.11087	1.15327	1.10585	0.160801	0.195539	0.115282		S	3	___2	1	2.97148e-05	54.952	42.736	45.227
A8J225	35.2	not assigned.unknown	(original description: Low-CO2-inducible protein (Fragment) OS=Chlamydomonas reinhardtii GN=LCI23 PE=4 SV=1)	Cre06.g281600.t2.1	0.90976	1.1251	0.934516	0.916849	1.11384	1.21139	1.55639	2.83642	1.92844	0.0221868	0.0641304	0.127781	0.0548387	0.0800819	0.0725322	0.916955	1.17551	1.08192	0.884869	1.05292	0.85519	0.927457	1.14687	0.866436	0.869449	1.20423	1.16066	0.976911	1.05176	1.29447	0.904186	1.08552	1.17904	0.88478	0.195761	0.552394		S	2	___2	0.996852	4.95206e-05	120.53	86.479	112.64
A8IPC9	18.3.2	Co-factor and vitamine metabolism.riboflavin.riboflavin synthase	(chl4|523820 : 409.0) no description available & (gnl|cdd|84418 : 266.0) no description available & (gnl|cdd|38520 : 131.0) no description available & (at2g20690 : 106.0) A synthetic gene encoding the catalytic domain of the Arabidopsis thaliana gene At2g20690 was recombinant expressed in E. coli demonstrating the molecular function of riboflavin synthase.; lumazine-binding family protein; FUNCTI…	Cre06.g296600.t1.2	0.915594	0.949599	0.983145	0.879899	0.89419	0.883638	1.46344	0.257107	0.209269	0.0772166	0.0224325	0.0158836	0.0836327	0.0668023	0.0312218	0.87644	0.929117	0.967685	1.00454	0.946106	0.98233	0.865799	0.973572	0.999421	0.863974	0.864466	0.855164	0.805375	0.970696	0.917025	0.97035	0.847409	0.878724	0.0764125	0.196057	0.437756		T	2	___2	0.990364	0.0099365	60.246	18.766	47.64
A8I180	35.2	not assigned.unknown	(original description: Basal body protein OS=Chlamydomonas reinhardtii GN=BUG23 PE=4 SV=1)	0	1.11693	1.05121	0.962047	1.11334	1.05424	1.1168	0.971541	0.909712	1.07871	0.0213515	0.0193033	0.135353	0.012175	0.0250397	0.0595112	1.1406	1.06786	1.05002	1.09912	1.03005	1.02993	1.11107	1.0557	0.806185	1.09982	1.0776	1.0551	1.11676	1.05733	1.17385	1.12344	1.02781	1.12145	0.791126	0.19752	0.369681		S	2	___1	0.998121	4.05056e-06	170.35	141.72	170.35
A8J2K0	35.2	not assigned.unknown	(original description: Predicted protein OS=Chlamydomonas reinhardtii GN=CHLREDRAFT_205703 PE=4 SV=1)	0	0.898274	0.951268	0.984267	0.887922	0.938419	1.0107	0.00930529	0.845096	0.0439513	0.066097	0.0982529	0.0163991	0.00669973	0.0709368	0.152642	0.915251	1.02433	0.992079	0.825345	0.83957	0.965422	0.954227	0.989899	0.995299	0.890277	0.869594	0.836573	0.880362	1.01129	1.1214	0.893126	0.934368	1.07414	0.0358889	0.197683	0.833827		S	2	___1	0.990544	0.000275577	157.33	106.07	157.33
A8HYP5	35.2	not assigned.unknown	(original description: Intraflagellar transport protein 43 OS=Chlamydomonas reinhardtii GN=IFT43 PE=2 SV=1)	0	0.918387	0.919794	0.990645	0.864037	0.924372	0.929658	0.904559	1.10837	0.352303	0.038121	0.0578515	0.02166	0.0326897	0.0221957	0.081645	0.961001	0.854554	0.978842	0.906635	0.939981	1.01564	0.887526	0.964848	0.97745	0.876102	0.898923	1.01865	0.88898	0.934471	0.858208	0.82703	0.939722	0.912119	0.996931	0.198703	0.317055		S	2	___2	0.946174	3.09451e-13	142.23	113.06	80.868
A8HZT8	35.2	not assigned.unknown	(original description: Flagellar associated protein OS=Chlamydomonas reinhardtii GN=FAP18 PE=4 SV=1)	0	1.0098	0.920626	0.955193	1.05987	0.945873	1.01322	0.599615	0.916403	0.0309211	0.0799225	0.0627922	0.113532	0.0243612	0.112391	0.016893	0.917873	0.923006	1.01927	1.04876	0.856677	0.824109	1.06278	0.982194	1.0222	1.08263	1.01618	1.01262	1.06281	1.00518	0.996633	1.03417	0.816251	1.0304	0.104803	0.201273	0.457882		S	3	___1	0.981707	3.61428e-05	90.755	65.26	70.555
A8J152	28.2	DNA.repair	(chl4|519485 : 393.0) no description available & (gnl|cdd|87586 : 188.0) no description available & (gnl|cdd|37345 : 131.0) no description available & (loc_os01g53560.1 : 126.0) no description available & (at3g14890 : 121.0) phosphoesterase; FUNCTIONS IN: DNA binding, catalytic activity, zinc ion binding; EXPRESSED IN: 24 plant structures; EXPRESSED DURING: 15 growth stages; CONTAINS InterPro DOM…	Cre09.g388726.t3.1	1.08987	1.05504	1.01539	1.04945	0.990936	1.03942	0.44591	0.446909	0.356419	0.0665617	0.0161813	0.0589242	0.0168185	0.112607	0.0127404	1.16044	1.07359	0.964897	1.02821	1.04771	1.00115	1.08096	1.04382	1.08013	1.04995	1.02487	1.05176	1.06602	1.08267	1.02632	1.03239	0.865264	1.04019	0.695122	0.203263	0.201805		T	3	___1	0.999999	1.04482e-14	131.48	105.75	126.62
A8IZJ6	35.2	not assigned.unknown	(original description: RWP-RK transcription factor OS=Chlamydomonas reinhardtii GN=RWP13 PE=4 SV=1)	0	1.06458	1.05783	1.05207	1.05351	1.04973	1.13083	0.850014	1.19403	1.6851	0.0277417	0.0184931	0.0105785	0.0154581	0.0160453	0.0507431	1.0965	1.07078	1.06392	1.05087	1.03665	1.04874	1.04635	1.06607	1.04356	1.04262	1.05871	1.07618	1.07121	1.05928	1.17646	1.04671	1.03121	1.13984	0.266338	0.203744	0.58433		S	2	___1	1	2.62679e-09	177.21	145.45	80.96
A8ITZ8	35.2	not assigned.unknown	(original description: Predicted protein OS=Chlamydomonas reinhardtii GN=CHLREDRAFT_171274 PE=4 SV=1)	0	0.91352	0.920485	0.889311	0.995266	0.927909	0.897974	0.587267	0.625042	0.325431	0.0552605	0.0729028	0.0752772	0.0347181	0.0651142	0.0306869	0.953282	0.923762	0.817202	0.850419	0.845998	0.9674	0.936859	0.991693	0.883331	0.955199	0.852753	0.919563	1.01417	0.963619	0.911512	1.01643	0.967356	0.862846	0.838765	0.204134	0.84361		Y	2	___2	1	0.0220505	46.796	15.823	46.796
A8JDP7	35.2	not assigned.unknown	no hits & (original description: Predicted protein (Fragment) OS=Chlamydomonas reinhardtii GN=CHLREDRAFT_153229 PE=4 SV=1)	Cre12.g493900.t1.1	1.00117	0.9646	0.999451	0.834433	0.909459	0.997822	1.5779	0.980575	0.976377	0.107258	0.0737844	0.017779	0.0103707	0.0676838	0.0382686	1.08863	1.01442	0.995437	1.03338	0.999545	0.984022	0.881499	0.879835	1.01889	0.827205	0.982029	0.957407	0.846316	0.848048	1.0335	0.829778	0.898299	1.00256	0.118569	0.205438	0.820328		S	2	___1	0.994519	2.64922e-08	152.59	118.21	152.59
A8IP72	35.2	not assigned.unknown	(original description: Dynein heavy chain OS=Chlamydomonas reinhardtii GN=CHLREDRAFT_206178 PE=4 SV=1)	0	1.10239	0.982455	0.949418	0.964625	0.937603	0.820002	1.92824	1.80623	0.293766	0.0236246	0.0905724	0.0177059	0.126321	0.0789817	0.0440596	1.12877	1.05657	0.955296	1.08318	1.0093	0.92952	1.09521	0.881496	0.963437	1.02107	0.930418	0.774042	0.819924	1.01993	0.824086	1.05288	0.86246	0.861877	0.190796	0.207753	0.574582		S	3	___1	0.999998	0.000204128	79.341	54.448	79.341
A8IKR5	35.2	not assigned.unknown	(original description: Predicted protein OS=Chlamydomonas reinhardtii GN=CHLREDRAFT_144655 PE=4 SV=1)	0	1.06574	1.02967	1.09738	1.01965	1.04595	1.02397	0.495003	0.0752842	0.264314	0.0529361	0.133475	0.027715	0.0392103	0.0570376	0.059248	1.00541	0.878251	1.1087	1.10445	1.0805	1.11764	1.08734	1.13027	1.0658	0.975104	0.988854	1.0865	1.04895	1.10293	0.968666	1.03488	1.04605	1.01675	0.809742	0.208346	0.040788		T	2	___1	0.999025	3.39367e-06	132.56	109.78	109.39
A8I0F0	35.2	not assigned.unknown	(original description: Ring3 protein OS=Chlamydomonas reinhardtii GN=CHLREDRAFT_182576 PE=4 SV=1)	Cre10.g455500.t1.2	1.03326	1.09909	1.13603	1.10616	1.10942	1.13958	0.868308	1.5155	0.578625	0.0854061	0.0217632	0.00308258	0.021152	0.0192201	0.0149409	0.938735	1.09893	1.13726	1.10487	1.0774	1.13831	1.05618	1.12093	1.13252	1.11067	1.0942	1.12326	1.12469	1.13102	1.15259	1.08312	1.10304	1.14289	0.452203	0.208721	0.837296		S	2	___1	1	1.75773e-06	130.69	109.31	128.36
A8HRL3	29.4	protein.postranslational modification	(chl4|514224 : 1210.0) no description available & (gnl|cdd|35413 : 161.0) no description available & (gnl|cdd|29142 : 142.0) no description available & (at1g62400 : 111.0) high leaf temperature 1 (HT1); CONTAINS InterPro DOMAIN/s: Protein kinase, catalytic domain (InterPro:IPR000719), Serine/threonine-protein kinase domain (InterPro:IPR002290), Tyrosine-protein kinase, catalytic domain (InterPro:…	0	0.890466	0.883836	0.880272	0.839979	0.852282	0.911432	0.451969	0.488945	0.741148	0.048255	0.0150977	0.0288464	0.0279252	0.0615169	0.0193378	0.930625	0.866403	0.913464	0.903838	0.892458	0.866087	0.836936	0.892646	0.861264	0.850897	0.815775	0.901831	0.808244	0.817764	0.898773	0.860795	0.923306	0.933691	0.207448	0.210923	0.203918		S	2	___1	0.99943	3.39534e-06	142.39	107.32	142.39
A8JFN0	35.2	not assigned.unknown	(original description: Predicted protein (Fragment) OS=Chlamydomonas reinhardtii GN=CHLREDRAFT_153922 PE=4 SV=1)	0	1.01019	1.06321	1.00157	0.937069	0.981691	0.946964	0.667269	0.155162	0.00964989	0.0615536	0.0220646	0.175854	0.107022	0.0963888	0.144047	0.94492	1.04767	1.10403	1.06719	1.0535	1.10216	1.01847	1.08846	0.798511	0.85507	1.04171	0.838815	0.898	0.870508	1.11048	1.05814	1.03286	0.891598	0.207137	0.211774	0.812576		S	2	___1	1	0.00284253	106.54	66.996	90.861
A8I3H9	35.2	not assigned.unknown	(original description: Predicted protein (Fragment) OS=Chlamydomonas reinhardtii GN=CHLREDRAFT_141735 PE=4 SV=1)	0	1.02396	0.965817	0.995278	0.966778	0.991745	1.09711	0.310088	0.584788	0.72836	0.0646277	0.11848	0.026457	0.0875915	0.0222352	0.0484082	0.985459	0.838014	0.982297	0.987852	0.987444	0.977818	1.09857	1.07199	1.02572	1.02502	0.966135	1.05868	1.00927	1.00613	1.15148	0.866046	1.00297	1.08118	0.217539	0.212214	0.28414		S	2	___1	0.9995	1.72157e-29	164.93	136.55	145.1
A8IFK0	34.1	transport.p- and v-ATPases	(chl4|520740 : 2108.0) no description available & (gnl|cdd|35426 : 536.0) no description available & (gnl|cdd|30822 : 453.0) no description available & (loc_os12g44150.1 : 432.0) no description available & (at3g47950 : 429.0) mutant has Slight reduction in root and shoot growth; Exaggerated defects in salt stress; Plasma Membrane H+ ATPase; H(+)-ATPase 4 (HA4); FUNCTIONS IN: ATPase activity, hydr…	Cre03.g164600.t1.2	1.09172	1.06983	1.01354	1.02036	1.00566	0.910027	1.23705	0.847121	0.0436213	0.0347076	0.0228006	0.0420716	0.1218	0.135005	0.0495739	1.11116	1.05194	1.05938	1.11235	1.0955	0.976677	1.05165	1.06204	1.00458	1.11519	0.849822	0.960568	0.882995	1.08008	0.86148	1.06289	1.08708	0.908035	0.279448	0.21546	0.749843		S	3	___2	0.98019	6.96753e-08	120.42	97.546	64.589
A8HNG7	35.2	not assigned.unknown	(original description: Predicted protein OS=Chlamydomonas reinhardtii GN=CHLREDRAFT_190150 PE=4 SV=1)	#N/A	1.16835	1.18532	1.19247	1.17487	1.16709	1.26335	0.991101	2.63599	1.7361	0.00556819	0.0133392	0.018988	0.0324814	0.0240572	0.0338825	1.16742	1.1905	1.17067	1.17432	1.17017	1.20536	1.1633	1.19529	1.2014	1.14139	1.14636	1.22426	1.20625	1.19347	1.28431	1.17698	1.16143	1.28148	0.852041	0.216225	0.639811		S	2	___1	1	2.46549e-149	259.55	195.24	77.39
Q66YD0	27.3.99	RNA.regulation of transcription.unclassified	(chl4|514611 : 347.0) no description available & (at1g65260 : 195.0) Encodes a protein required for thylakoid membrane formation.; plastid transcriptionally active 4 (PTAC4); INVOLVED IN: vesicle organization, thylakoid membrane organization; LOCATED IN: in 8 components; EXPRESSED IN: 23 plant structures; EXPRESSED DURING: 15 growth stages; CONTAINS InterPro DOMAIN/s: PspA/IM30 (InterPro:IPR00715…	Cre13.g583550.t1.2	1.0132	0.862623	0.917588	0.954971	0.892847	0.869898	0.339677	1.34679	0.295552	0.0892179	0.0586941	0.0435457	0.114997	0.0448961	0.0247033	0.913923	0.803626	0.9514	1.03899	0.92101	0.868452	1.08668	0.863233	0.932912	0.964197	0.846575	0.849601	0.83564	0.895739	0.86269	1.06508	0.936228	0.897404	0.963599	0.216814	0.952313		S	2	___1	0.934078	0.000665029	108.96	88.59	108.96
A8JHQ1	35.2	not assigned.unknown	(original description: DnaJ-like protein OS=Chlamydomonas reinhardtii GN=DNJ16 PE=4 SV=1)	0	1.11183	1.16391	1.12892	1.17818	1.1532	1.23011	0.670785	0.108315	0.283853	0.194458	0.0250558	0.0428788	0.0338299	0.0359161	0.00498586	1.27018	1.1915	1.08491	0.894786	1.14257	1.13127	1.17052	1.15765	1.17057	1.13913	1.19197	1.225	1.19665	1.12107	1.23496	1.19875	1.14656	1.23039	0.959879	0.216992	0.359656		S	3	___1	1	7.75669e-19	144.4	112.48	49.623
A8JEV1	1.1.1.2	PS.lightreaction.photosystem II.PSII polypeptide subunits	(p12852|psbq_chlre : 224.0) Oxygen-evolving enhancer protein 3, chloroplast precursor (OEE3) - Chlamydomonas reinhardtii & (chl4|525487 : 224.0) no description available & (gnl|cdd|69290 : 167.0) no description available & (ipr008797 : 139.1227) Photosystem II PsbQ, oxygen evolving complex (original description: Oxygen evolving enhancer protein 3 OS=Chlamydomonas reinhardtii GN=PSBQ PE=4 SV=1)	Cre08.g372450.t1.2	0.89887	1.04419	1.06286	1.10669	0.99598	0.906654	0.00583083	0.0403826	0.945254	0.0734076	0.192963	0.029913	0.220367	0.15811	0.0531782	0.979336	1.19311	1.04303	0.835559	1.11327	1.04827	0.881714	0.826197	1.09726	1.22452	1.13388	0.945397	0.852463	0.823412	0.928539	1.2431	1.03065	0.846025	0.790768	0.217544	0.499496		S	3	___2	0.993005	0.0141524	64.136	35.958	64.136
A8IND8	35.2	not assigned.unknown	(original description: Flagellar associated protein OS=Chlamydomonas reinhardtii GN=FAP16 PE=4 SV=1)	0	0.865069	0.901272	0.90807	0.86879	0.862658	0.964426	0.134043	1.37649	0.676057	0.0549589	0.0531424	0.00452405	0.0470223	0.0381805	0.0439217	0.923495	0.92625	0.909494	0.85731	0.840242	0.91171	0.814402	0.937323	0.903005	0.883008	0.886525	0.913709	0.907062	0.882826	0.989711	0.816299	0.818622	0.989857	0.0826844	0.217915	0.890605		S	2	___1	0.99985	0.00124322	101.2	69.777	90.498
Q65Z16	35.2	not assigned.unknown	(original description: NSG17 protein OS=Chlamydomonas reinhardtii GN=NSG17 PE=2 SV=1)	Cre14.g620850.t1.2	0.885812	0.909027	0.905763	0.825854	0.946812	0.868325	0.348112	0.970573	0.531324	0.0653679	0.0226134	0.0139919	0.025351	0.0967544	0.0488906	0.923371	0.913785	0.900225	0.923733	0.928883	0.895388	0.810332	0.884414	0.921676	0.854864	0.919047	0.855956	0.807962	0.866975	0.922212	0.814736	1.05441	0.826806	0.182564	0.219707	0.76953		S	2	___3	0.993452	3.23735e-13	180.41	128.57	92.474
A8IW11	35.2	not assigned.unknown	(original description: Predicted protein OS=Chlamydomonas reinhardtii GN=CHLREDRAFT_190358 PE=4 SV=1)	0	0.898994	0.850863	0.899194	0.873531	1.0257	1.10463	3.346	2.07373	2.30887	0.0279886	0.0132915	0.112292	0.02102	0.0163348	0.0476601	0.890091	0.838764	0.814201	0.930352	0.848736	0.856887	0.876541	0.86509	1.02649	0.896712	1.04439	1.05785	0.855709	1.01858	1.15313	0.868172	1.01414	1.1029	0.0540036	0.219957	0.447182		S	2	___2	0.968441	0.00037575	104.95	76.402	93.551
A8I754	35.2	not assigned.unknown	(original description: Predicted protein (Fragment) OS=Chlamydomonas reinhardtii GN=CHLREDRAFT_187531 PE=4 SV=1)	0	1.08515	1.02349	1.06611	1.08557	1.05822	1.05438	0.259833	1.36401	0.476124	0.0513026	0.032772	0.00539661	0.018539	0.0150754	0.00610605	1.13601	0.985942	1.06091	1.03342	1.03821	1.06574	1.08602	1.04632	1.07169	1.10696	1.04142	1.06131	1.07564	1.06266	1.05204	1.07412	1.07057	1.04979	0.859736	0.220281	0.829697		S	3	___2	0.999726	3.73095e-13	155.16	125.85	115.77
Q00914	1.1.2.2	PS.lightreaction.photosystem I.PSI polypeptide subunits	(gnl|cdd|79282 : 141.0) no description available & (q00914|psac_chlre : 139.0) Photosystem I iron-sulfur center (Photosystem I subunit VII) (9 kDa polypeptide) (PSI-C) (PsaC) - Chlamydomonas reinhardtii & (atcg01060 : 129.0) Encodes the PsaC subunit of photosystem I.; PSAC; FUNCTIONS IN: 4 iron, 4 sulfur cluster binding, electron carrier activity, iron-sulfur cluster binding; INVOLVED IN: photosy…	0	0.943431	0.952438	0.975893	0.996221	0.958855	1.02114	1.41437	1.00763	0.371429	0.0538255	0.0230489	0.0179164	0.0150361	0.0243254	0.0386743	0.885922	0.94936	0.971877	0.992599	0.931083	0.995476	0.951772	0.976871	0.960325	0.990279	0.963818	0.985166	1.01332	0.980316	1.06204	0.985064	0.932431	1.01622	0.177979	0.224396	0.590518		S	2	___1	0.939595	0.00928038	97.472	76.099	84.198
A8JF49	35.2	not assigned.unknown	(original description: Flagellar associated protein (Fragment) OS=Chlamydomonas reinhardtii GN=FAP15 PE=4 SV=1)	0	1.02694	1.08208	1.0313	1.05394	0.914619	1.1121	0.117459	0.182205	0.535143	0.176903	0.0240007	0.199036	0.148374	0.135223	0.0210521	1.07438	1.05471	1.15198	1.17528	1.092	1.14035	0.831148	1.09953	0.801569	1.17291	1.0692	1.13287	1.10123	0.856415	1.09077	0.887688	0.818242	1.11265	0.500835	0.224817	0.83554		S	2	___1	1	9.83928e-07	156.2	118.54	156.2
A8JI39	35.2	not assigned.unknown	(original description: Predicted protein (Fragment) OS=Chlamydomonas reinhardtii GN=CHLREDRAFT_195087 PE=4 SV=1)	0	1.00581	1.22169	1.11589	1.23482	1.22808	1.33702	2.0363	0.764813	0.815966	0.172086	0.00954598	0.18079	0.0218167	0.043556	0.0179866	0.872909	1.22826	1.22919	0.94432	1.21074	1.21107	1.20019	1.22606	0.907388	1.25128	1.27776	1.32145	1.24311	1.19645	1.35671	1.21007	1.21004	1.3329	0.22315	0.227986	0.272985		S	2	___1	1	3.72856e-183	237.06	209.29	98.227
A8J0N4	29.4	protein.postranslational modification	(chl4|519864 : 684.0) no description available & (gnl|cdd|29062 : 216.0) no description available & (gnl|cdd|35917 : 193.0) no description available & (ipr001932 : 192.42389) Protein phosphatase 2C-like & (at1g72770 : 161.0) mutant has ABA hypersensitive inhibition of seed germination; Protein Phosphatase 2C; regulates the activation of the Snf1-related kinase OST1 by abscisic acid.; homology to …	0	1.0744	0.992696	0.924829	0.981844	0.99461	1.12375	0.392769	0.115696	1.38775	0.0596286	0.10297	0.121208	0.0960093	0.0921556	0.0246968	1.14021	1.07432	1.05339	1.02395	1.02675	0.908469	1.05905	0.877013	0.812632	0.874732	0.888327	1.09544	1.01064	1.04322	1.13493	1.06016	1.05228	1.14089	0.147181	0.228473	0.100395		S	2	___1	1	4.57795e-06	156.14	134.51	127.57
A8J0N7	6.4	gluconeogenesis / glyoxylate cycle.PEPCK	#N/A	Cre02.g141400.t1.2	1.06876	1.17849	1.1724	1.07258	1.07078	1.24633	0.0668426	0.815674	0.381661	0.0922794	0.0298314	0.0122163	0.167826	0.201274	0.0394738	1.04272	1.21222	1.17064	0.992295	1.15559	1.18539	1.17126	1.16765	1.16115	0.878819	1.19027	1.20275	1.16644	1.18367	1.27968	1.17247	0.838404	1.25655	0.685472	0.228566	0.576559		S	2	___3	0.985668	0.00273198	78.228	23.873	67.902
A8J0N7	6.4	gluconeogenesis / glyoxylate cycle.PEPCK	#N/A	Cre02.g141400.t1.2	1.06876	1.17849	1.1724	1.04523	1.07396	1.24633	0.115145	0.810265	0.307118	0.0922794	0.0298314	0.0122163	0.215186	0.195776	0.0394738	1.04272	1.21222	1.17064	0.992295	1.15559	1.18539	1.17126	1.16765	1.16115	0.796778	1.19027	1.20275	1.16644	1.18367	1.27968	1.17247	0.847928	1.25655	0.611151	0.228566	0.58278		S	2	___3	0.984428	0.00273198	78.228	23.873	78.228
A8J0N7	6.4	gluconeogenesis / glyoxylate cycle.PEPCK	#N/A	Cre02.g141400.t1.2	1.06876	1.17849	1.1724	1.05549	1.07903	1.24633	0.0853175	0.845808	0.324346	0.0922794	0.0298314	0.0122163	0.197421	0.187003	0.0394738	1.04272	1.21222	1.17064	0.992295	1.15559	1.18539	1.17126	1.16765	1.16115	0.827552	1.19027	1.20275	1.16644	1.18367	1.27968	1.17247	0.863127	1.25655	0.63494	0.228566	0.593499		T	2	___3	0.994607	0.00273198	78.228	23.873	78.228
A8J0N7	6.4	gluconeogenesis / glyoxylate cycle.PEPCK	#N/A	Cre02.g141400.t1.2	1.06876	1.17849	1.1724	1.04509	1.08571	1.24633	0.0923382	0.867034	0.293402	0.0922794	0.0298314	0.0122163	0.21543	0.175429	0.0394738	1.04272	1.21222	1.17064	0.992295	1.15559	1.18539	1.17126	1.16765	1.16115	0.796357	1.19027	1.20275	1.16644	1.18367	1.27968	1.17247	0.883175	1.25655	0.610853	0.228566	0.609345		S	2	___3	0.985668	0.00273198	78.228	23.873	67.902
A8IYQ7	35.2	not assigned.unknown	(original description: Predicted protein (Fragment) OS=Chlamydomonas reinhardtii GN=CHLREDRAFT_148132 PE=4 SV=1)	0	1.14398	0.971497	0.984929	0.928239	0.982332	0.887031	1.65023	0.838385	1.02291	0.0244951	0.109265	0.0056101	0.150097	0.0656237	0.0256916	1.16919	1.02931	0.989257	1.12027	0.845473	0.986938	1.14249	1.03971	0.97859	1.10047	1.007	0.878116	0.825374	0.907949	0.866984	0.858869	1.03205	0.915993	0.469508	0.229212	0.166657		T	3	___1	0.759245	0.00167767	74.392	54.136	57.073
A8IWK7	35.2	not assigned.unknown	(original description: Predicted protein OS=Chlamydomonas reinhardtii GN=CHLREDRAFT_147368 PE=4 SV=1)	Cre03.g194150.t1.1	0.998888	1.00801	1.13418	0.965955	0.970547	1.03346	1.00858	1.39154	0.197931	0.0845817	0.0484272	0.0270655	0.0654481	0.103622	0.0452216	0.901815	1.01264	1.13415	1.03812	1.05396	1.16126	1.05673	0.95744	1.10713	1.00299	0.949126	1.08158	0.890387	1.0832	0.991847	1.00449	0.87931	1.02695	0.951844	0.229861	0.331634		T	3	___1	0.789341	0.000440371	72.676	25.724	69.272
A8J526	35.2	not assigned.unknown	(original description: Predicted protein (Fragment) OS=Chlamydomonas reinhardtii GN=CHLREDRAFT_150094 PE=4 SV=1)	0	1.32257	1.23275	1.19762	1.13359	1.25552	1.11774	0.693538	0.311349	0.405175	0.0780559	0.0324001	0.0459991	0.204022	0.0279984	0.219769	1.40773	1.22937	1.1808	1.25443	1.20217	1.1624	1.30553	1.26671	1.24967	1.24952	1.26156	1.26126	0.898018	1.28	0.864737	1.25324	1.22499	1.22723	0.836809	0.230307	0.108576		S	2	___1	1	3.92019e-18	164.8	110.57	62.193
A8JCQ6	35.2	not assigned.unknown	(original description: Predicted protein OS=Chlamydomonas reinhardtii GN=CHLREDRAFT_178578 PE=4 SV=1)	0	1.35032	1.2163	1.1973	1.28397	1.21924	1.13339	0.346989	0.963729	0.0747307	0.122964	0.0421826	0.0204377	0.0167611	0.0383367	0.24623	1.47592	1.26001	1.17391	1.23018	1.17583	1.20632	1.34487	1.21308	1.21169	1.28088	1.2619	0.849628	1.30205	1.18768	1.29069	1.26896	1.20812	1.25986	0.359855	0.230331	0.831685		S	2	___1	1	1.22566e-23	190.37	160.29	190.37
A8HQ72	27.1.1	RNA.processing.splicing	(chl4|511153 : 303.0) no description available & (gnl|cdd|35328 : 142.0) no description available & (loc_os07g47630.2 : 116.0) no description available & (at4g02430 : 105.0) RNA-binding (RRM/RBD/RNP motifs) family protein; FUNCTIONS IN: RNA binding, nucleotide binding, nucleic acid binding; INVOLVED IN: biological_process unknown; LOCATED IN: cellular_component unknown; EXPRESSED IN: 23 plant str…	Cre01.g026450.t1.2	0.901409	1.13091	0.996339	1.04676	1.167	1.33711	1.68548	1.20843	0.703791	0.0405237	0.240874	0.198925	0.083096	0.0845791	0.04435	0.91575	1.30963	0.881814	0.932812	0.856984	1.22604	0.855665	1.22611	0.881164	1.11169	1.24859	1.28606	1.07547	1.17269	1.36615	0.953113	1.07971	1.35911	0.28909	0.23081	0.445815		S	2	___1	1	0.00323442	116.9	92.392	102.63
Q84XS0	21.1	redox.thioredoxin	(chl4|522734 : 285.0) no description available & (gnl|cdd|36125 : 113.0) no description available & (gnl|cdd|84504 : 102.0) no description available & (at5g39950 : 95.9) encodes a cytosolic thioredoxin that reduces disulfide bridges of target proteins by the reversible formation of a disulfide bridge between two neighboring Cys residues present in the active site. Thioredoxins have been found to …	Cre05.g248500.t1.2	0.877958	0.869116	0.972046	0.853201	0.880992	0.868272	0.653389	0.490818	0.502802	0.0321219	0.0294291	0.0760791	0.0645184	0.106556	0.0376639	0.860864	0.835135	1.00715	0.915013	0.885868	1.02423	0.857998	0.886344	0.884753	0.779879	0.768211	0.90201	0.901289	0.894783	0.827635	0.878434	0.979981	0.87517	0.285981	0.236462	0.383449		S	2	___1	0.992109	0.000255339	129.34	70.973	129.34
A8I6R6	35.2	not assigned.unknown	(original description: Heat shock protein 22A OS=Chlamydomonas reinhardtii GN=HSP22A PE=3 SV=1)	Cre07.g318800.t1.2	1.13719	1.00553	1.00247	1.15036	1.09447	1.03774	1.25151	2.83996	0.431136	0.0731789	0.0301131	0.0617139	0.017365	0.0234284	0.0416708	1.21772	1.04027	1.04102	1.07475	0.98944	0.931286	1.11911	0.98688	1.03509	1.13873	1.06769	1.07505	1.17032	1.11117	0.992769	1.14203	1.10454	1.04539	0.930727	0.236478	0.352007		S	2	___1	1	1.47891e-08	142.97	111.54	113.63
A8IT61	35.2	not assigned.unknown	(original description: Predicted protein OS=Chlamydomonas reinhardtii GN=CHLREDRAFT_189453 PE=4 SV=1)	0	0.910471	1.05522	0.978544	0.961169	1.07915	1.1624	1.59436	1.99307	0.795728	0.0116176	0.0328914	0.155069	0.0352316	0.0233822	0.0613518	0.922716	1.05934	1.06528	0.899604	1.08585	0.799514	0.909094	1.02046	1.07084	1.00177	1.07516	1.10739	0.943151	1.10427	1.22856	0.93859	1.05802	1.15123	0.461203	0.236879	0.562411		S	2	___2	0.999875	3.94455e-05	136.81	102.63	136.81
A8J8D7	35.2	not assigned.unknown	(original description: Predicted protein (Fragment) OS=Chlamydomonas reinhardtii GN=CHLREDRAFT_192775 PE=4 SV=1)	0	0.940024	0.852492	0.843792	0.891982	0.893785	0.895202	0.378192	1.00491	1.1028	0.0622359	0.0361478	0.0207295	0.0147451	0.0296921	0.0426624	1.0066	0.884067	0.822198	0.930175	0.813063	0.845644	0.8833	0.860346	0.863532	0.893312	0.921446	0.889112	0.906017	0.897499	0.940583	0.876617	0.862411	0.855913	0.959233	0.237717	0.687624		S	2	___2	1	0.00027334	125.97	100.68	85.473
A8IGD9	35.2	not assigned.unknown	(original description: Low-CO2-inducible protein OS=Chlamydomonas reinhardtii GN=LCI5 PE=4 SV=1)	0	1.23157	1.23412	1.46212	1.21459	1.47968	1.60693	0.560202	0.981714	0.205838	0.322416	0.337258	0.00550561	0.303481	0.0198046	0.0993786	1.47905	1.42569	1.46848	1.34869	0.844707	1.45888	0.866962	1.43196	1.459	0.864423	1.49231	1.50488	1.37804	1.45685	1.70341	1.40132	1.48987	1.61249	0.466346	0.237743	0.286854		S	2	___1	0.999823	2.94043e-20	141.06	83.494	106.76
A8IXG4	35.2	not assigned.unknown	(original description: Predicted protein OS=Chlamydomonas reinhardtii GN=CHLREDRAFT_190570 PE=4 SV=1)	0	1.17194	1.01132	0.993523	1.11698	0.905167	0.884618	1.87142	3.586	0.134708	0.0703075	0.00688343	0.0247307	0.0601155	0.113306	0.0635582	1.20921	1.00723	0.965002	1.09085	1.00745	1.00655	1.21577	1.01926	1.00902	1.08835	1.01902	0.95604	1.07653	0.792414	0.863528	1.18606	0.904069	0.834285	0.665682	0.239144	0.448192		Y	2	___1	0.996925	0.0165935	64.73	10.205	64.73
A8IJD8	29.2.3	protein.synthesis.initiation	(chl4|512887 : 626.0) no description available & (gnl|cdd|36674 : 269.0) no description available & (at2g34970 : 187.0) Trimeric LpxA-like enzyme; FUNCTIONS IN: binding, transferase activity, translation initiation factor activity, nucleotidyltransferase activity; INVOLVED IN: biosynthetic process, regulation of translational initiation; EXPRESSED IN: 23 plant structures; EXPRESSED DURING: 13 gro…	0	0.9217	1.04331	1.01009	0.933104	1.02935	1.03698	0.103803	1.68687	0.0702122	0.0323594	0.0411422	0.00711778	0.0270165	0.0569991	0.128811	0.957534	1.08855	1.0045	0.912954	1.00814	1.00766	0.894613	1.03324	1.0181	0.911103	1.04335	0.889684	0.963258	1.07805	1.12853	0.924952	0.966658	1.09272	0.325553	0.2398	0.857593		S	2	___1	0.995795	1.34473e-17	180.32	159.85	149.47
Q9LLJ1	29.4	protein.postranslational modification	(chl4|513467 : 1131.0) no description available & (gnl|cdd|47550 : 261.0) no description available & (gnl|cdd|35800 : 221.0) no description available & (at2g45490 : 183.0) Encodes a member of a family of Ser/Thr kinases whose activities peak during cell division. Transcripts are abundant in tissues rich in dividing cells like roots and flowers but are low or absent in fully expanded leaves and st…	Cre12.g529550.t1.2	0.891616	1.03016	0.977606	0.907974	1.00849	1.09281	0.706858	2.5864	0.852054	0.0537824	0.0423829	0.0805017	0.0715864	0.0375302	0.0407173	0.888042	1.07738	1.04444	0.947097	0.995396	1.00013	0.83971	1.01772	0.88824	0.91984	1.01644	1.05431	0.972886	1.04141	1.13543	0.831196	0.967621	1.0887	0.932071	0.240043	0.632247		S	2	___1	0.99995	1.25268e-06	153	109.5	153
A8J8I8	35.2	not assigned.unknown	(original description: Flagellar associated protein OS=Chlamydomonas reinhardtii GN=FAP35 PE=4 SV=1)	Cre16.g657650.t1.2	1.03222	1.09682	1.11858	1.12687	1.13112	1.20217	1.46263	0.903248	0.16406	0.136063	0.00443949	0.00587667	0.0355718	0.0206981	0.05972	1.08501	1.09918	1.11624	0.877672	1.0917	1.12527	1.13398	1.09958	1.11423	1.13864	1.15105	1.14428	1.0869	1.13256	1.26356	1.15506	1.10973	1.19866	0.010168	0.240052	0.234131		S	2	___1	0.999992	6.58379e-57	222.13	192.77	69.92
A8IX75	35.2	not assigned.unknown	(original description: Predicted protein (Fragment) OS=Chlamydomonas reinhardtii GN=CHLREDRAFT_190523 PE=4 SV=1)	0	0.91296	1.22039	1.12172	0.96849	1.12429	0.855152	1.97194	3.54082	2.11889	0.0233726	0.0808228	0.0377137	0.10987	0.0734595	0.0711782	0.89404	1.29458	1.10675	0.939088	1.13427	1.16462	0.905754	1.23233	1.09378	1.01049	1.20823	0.866816	0.843815	1.07173	0.919778	1.05116	1.09291	0.778862	0.669809	0.240179	0.492785		Y	2	___1	0.999538	0.00811882	72.531	44.564	72.531
A8IGD9	35.2	not assigned.unknown	(original description: Low-CO2-inducible protein OS=Chlamydomonas reinhardtii GN=LCI5 PE=4 SV=1)	0	1.52587	1.45688	1.2991	1.46186	1.52951	1.60458	0.59001	0.0430005	0.582495	0.0959789	0.0602219	0.440765	0.0174997	0.0114186	0.0379739	1.63459	1.39596	1.567	1.45288	1.4583	0.790388	1.49014	1.51638	1.53991	1.44581	1.53115	1.56469	1.48052	1.51737	1.64029	1.45925	1.54003	1.60875	0.825855	0.240918	0.675383		S	2	___1	0.997328	2.28588e-28	200.86	128.63	162.88
A8ID43	35.2	not assigned.unknown	(original description: Predicted protein OS=Chlamydomonas reinhardtii GN=CHLREDRAFT_166055 PE=4 SV=1)	0	0.92244	0.996496	1.00205	0.954578	0.998957	1.07918	0.627026	1.31318	0.220022	0.0989722	0.0236305	0.00712713	0.10482	0.0223393	0.0466749	0.929887	1.02357	1.00592	0.819955	0.980028	1.00639	1.01748	0.985889	0.99382	1.01781	1.01601	1.02887	1.01234	0.97367	1.12107	0.833583	1.00719	1.08761	0.30103	0.242072	0.776602		S	2	___1	0.999651	0.00141079	105.1	73.166	83.998
A8IW32	35.2	not assigned.unknown	(original description: Predicted protein OS=Chlamydomonas reinhardtii GN=CHLREDRAFT_147265 PE=4 SV=1)	0	0.952446	1.05262	1.02519	0.981185	1.00887	0.945439	0.335699	0.340053	0.244393	0.0919315	0.0658234	0.127832	0.0514075	0.0649049	0.102957	0.930458	0.980473	0.882159	1.05338	1.06799	1.12829	0.873502	1.1094	1.06512	0.934665	0.942132	1.06118	1.03638	1.07177	0.864045	0.972514	1.0127	0.911093	0.387515	0.246181	0.553002		S	2	___1	1	5.14284e-18	180.64	180.64	180.64
Q6SA05	1.3.13	PS.calvin cycle.rubisco interacting	(chl4|522260 : 818.0) no description available & (p23489|rca_chlre : 816.0) Ribulose bisphosphate carboxylase/oxygenase activase, chloroplast precursor (RuBisCO activase) (RA) - Chlamydomonas reinhardtii & (loc_os11g47970.1 : 511.0) no description available & (at2g39730 : 506.0) Rubisco activase, a nuclear-encoded chloroplast protein that consists of two isoforms arising from alternative splicing…	Cre04.g229300.t1.1	1.50159	1.37258	1.2164	1.48066	1.38431	1.48704	1.43496	1.65093	1.84573	0.0725847	0.0322188	0.156723	0.0504784	0.0419015	0.0443897	1.48244	1.38356	1.30269	1.4405	1.3363	1.31101	1.58183	1.39786	1.03549	1.47008	1.43157	1.49544	1.43632	1.36967	1.52663	1.5356	1.3517	1.43905	0.239871	0.247538	0.572682		S	3	___1	0.93045	9.54243e-24	127.49	99.471	127.49
A8IK44	35.2	not assigned.unknown	(original description: Predicted protein OS=Chlamydomonas reinhardtii GN=CHLREDRAFT_169691 PE=4 SV=1)	0	1.14745	1.22146	1.12458	1.08309	1.09603	1.18096	0.236858	0.0521693	0.195592	0.269014	0.0417022	0.169886	0.186507	0.156354	0.0504179	1.35959	1.21468	0.930533	1.23789	1.18357	1.24651	0.844875	1.26614	1.1967	1.19218	0.915979	1.23656	0.867739	1.19762	1.16812	1.18936	1.17447	1.1382	0.757021	0.248101	0.647602		S	3	___1	0.964513	7.31116e-09	57.605	38.985	57.541
A8JAL6	29.2.1.1.1.2.15	protein.synthesis.ribosomal protein.prokaryotic.chloroplast.50S subunit.L15	(chl4|515215 : 359.0) no description available & (p31165|rk15_pea : 160.0) 50S ribosomal protein L15, chloroplast precursor (CL15) (Fragment) - Pisum sativum (Garden pea) & (at3g25920 : 157.0) encodes a plastid ribosomal protein CL15, a constituent of the large subunit of the ribosomal complex; ribosomal protein L15 (RPL15); FUNCTIONS IN: structural constituent of ribosome; INVOLVED IN: translati…	0	1.18011	1.13643	1.1857	1.18119	1.08938	1.21312	0.0550224	0.647144	0.123505	0.0213217	0.0353943	0.0393428	0.0375906	0.195106	0.0365983	1.17203	1.09822	1.22246	1.164	1.14296	1.19042	1.20429	1.1681	1.1442	1.22451	0.86409	1.17092	1.16203	1.20254	1.23221	1.15705	1.2015	1.23623	0.54584	0.248298	0.416846		S	3	___1	1	1.99009e-19	164.22	127.46	142.57
A8J265	35.1.8	not assigned.no ontology.BSD domain-containing protein	(chl4|523555 : 437.0) no description available & (gnl|cdd|37901 : 97.8) no description available & (at1g03350 : 82.8) BSD domain-containing protein; FUNCTIONS IN: molecular_function unknown; INVOLVED IN: biological_process unknown; LOCATED IN: cellular_component unknown; EXPRESSED IN: 24 plant structures; EXPRESSED DURING: 15 growth stages; CONTAINS InterPro DOMAIN/s: BSD (InterPro:IPR005607); BE…	0	1.29599	1.12193	1.14422	1.21936	1.12715	1.14695	0.300748	1.86912	0.274217	0.132469	0.0132184	0.0254512	0.015284	0.103238	0.00591725	1.44499	1.12603	1.15485	1.19153	1.10715	1.11518	1.25144	1.13262	1.16263	1.21341	1.00897	1.1416	1.23672	1.17275	1.15331	1.20794	1.19975	1.14595	0.365001	0.249196	0.957262		S	3	___1	0.999497	1.79793e-18	126.16	102.69	126.16
A8IVD5	35.2	not assigned.unknown	(original description: Predicted protein (Fragment) OS=Chlamydomonas reinhardtii GN=CHLREDRAFT_147098 PE=4 SV=1)	0	0.962301	0.850496	0.867571	0.947679	0.927796	1.00775	1.81326	0.970389	1.20334	0.0196726	0.0111151	0.0523351	0.0426391	0.0855614	0.0556932	0.944291	0.8591	0.867572	0.959316	0.854442	0.919905	0.983295	0.837947	0.815235	0.948245	0.956455	0.945527	0.90476	0.995348	1.02479	0.990032	0.831583	1.05293	0.0937654	0.249261	0.399867		T	2	___1	0.978529	0.00325049	106.54	72.668	106.54
A8IS73	29.5.7	protein.degradation.metalloprotease	(chl4|516749 : 172.0) no description available & (at5g35690 : 153.0) CONTAINS InterPro DOMAIN/s: WLM (InterPro:IPR013536), PUB domain (InterPro:IPR018997), PUG domain (InterPro:IPR006567); BEST Arabidopsis thaliana protein match is: zinc ion binding (TAIR:AT1G55915.1); Has 30201 Blast hits to 17322 proteins in 780 species: Archae - 12; Bacteria - 1396; Metazoa - 17338; Fungi - 3422; Plants - 5037…	0	1.00331	1.08817	1.08923	1.05027	1.11977	1.20322	1.85715	2.52806	0.50616	0.0965035	0.0118247	0.0290451	0.00969668	0.0216359	0.0507277	1.08516	1.07871	1.05659	0.896904	1.08438	1.11223	1.02788	1.10143	1.09888	1.04085	1.12719	1.14577	1.06022	1.13672	1.24183	1.04974	1.0954	1.22207	0.405061	0.250401	0.461144		S	2	___1	1	4.11075e-143	264.03	227.45	156.29
A8J9H8	23.4.10	nucleotide metabolism.phosphotransfer and pyrophosphatases.nucleoside diphosphate kinase	(chl4|516027 : 300.0) no description available & (at4g09320 : 241.0) nucleoside diphosphate kinase type 1 (NDPK1) gene, complete; NDPK1; FUNCTIONS IN: nucleoside diphosphate kinase activity, ATP binding; INVOLVED IN: response to cadmium ion, response to salt stress; LOCATED IN: apoplast, peroxisome, chloroplast, plasma membrane, vacuole; EXPRESSED IN: 30 plant structures; EXPRESSED DURING: 15 gro…	#N/A	0.94179	0.838311	0.957289	0.948708	0.902093	0.95534	0.333996	1.1128	0.193753	0.0243643	0.0155166	0.0693173	0.0626078	0.0956415	0.0775574	0.969919	0.848709	1.03059	0.927274	0.820475	0.8928	0.928178	0.845747	0.948476	0.876423	0.875234	1.00516	0.983903	1.00829	0.865981	0.985797	0.822752	0.994875	0.677048	0.250644	0.695345		S	2	___1	0.979794	2.90673e-16	157.37	125.07	157.37
A8J345	4.1.14	glycolysis.cytosolic branch.pyruvate kinase (PK)	(chl4|511818 : 4519.0) no description available & (ipr015794 : 1500.0) Pyruvate kinase, alpha/beta & (gnl|cdd|29370 : 474.0) no description available & (gnl|cdd|37534 : 441.0) no description available & (at5g63680 : 371.0) Pyruvate kinase family protein; FUNCTIONS IN: pyruvate kinase activity, potassium ion binding, magnesium ion binding, catalytic activity; INVOLVED IN: response to cadmium ion, …	0	1.02709	1.11585	1.12463	1.08987	1.09367	1.0868	0.011074	0.467962	0.470217	0.137826	0.0361694	0.0225698	0.0227664	0.0246757	0.0171264	0.87043	1.10685	1.14931	1.1297	1.08502	1.11957	1.08114	1.15567	1.10503	1.11232	1.1174	1.07234	1.09049	1.06815	1.10571	1.0668	1.09548	1.08234	0.542261	0.250778	0.239708		S	2	___1	1	0.00444285	108.98	52.174	101.89
A8IQS4	35.2	not assigned.unknown	(original description: Predicted protein OS=Chlamydomonas reinhardtii GN=CHLREDRAFT_145319 PE=4 SV=1)	0	1.01548	1.00656	1.01275	0.988795	1.02587	1.04285	0.110513	0.138489	0.188786	0.0138508	0.0212639	0.00385162	0.0288526	0.0236142	0.126905	1.03051	0.998548	1.01117	1.01271	0.990474	1.01714	1.00323	1.03067	1.00994	0.956721	1.00052	0.897925	1.01264	1.02983	1.13408	0.997027	1.04725	1.09654	0.118681	0.250947	0.340338		S	2	___1	0.998296	2.04636e-12	168.16	138.61	115.87
A8IDG9	35.2	not assigned.unknown	(original description: Uncharacterized protein OS=Chlamydomonas reinhardtii GN=CHLREDRAFT_205593 PE=4 SV=1)	Cre03.g179941.t1.1	1.13175	0.961999	0.906357	1.00261	0.885032	1.00062	0.430422	1.52111	1.00608	0.0401153	0.0221185	0.0632178	0.176681	0.0761277	0.0191998	1.09907	0.987066	0.947211	1.11966	0.953701	0.938319	1.17652	0.945229	0.83354	1.06984	0.870177	0.989334	0.802187	0.817428	1.02279	1.13581	0.967493	0.989734	0.662551	0.251103	0.707621		T	2	___1	0.91563	6.88338e-268	257.37	214.07	161.48
A8HZT8	35.2	not assigned.unknown	(original description: Flagellar associated protein OS=Chlamydomonas reinhardtii GN=FAP18 PE=4 SV=1)	0	1.18237	0.970722	1.15574	0.924566	1.04478	1.14651	0.368627	0.461863	0.621672	0.0245495	0.166809	0.00707076	0.196064	0.211101	0.233391	1.19983	1.15813	1.1614	1.19299	0.91556	1.15799	1.1543	0.838482	1.14781	0.840496	0.806613	0.878175	1.14865	1.20883	1.30233	0.784556	1.11889	1.25902	0.000176467	0.252085	0.968784		S	2	___1	0.979552	1.53482e-05	126.24	74.516	126.24
A8HMI6	35.2	not assigned.unknown	(original description: Predicted protein OS=Chlamydomonas reinhardtii GN=CHLREDRAFT_190023 PE=4 SV=1)	0	1.00273	0.971096	0.953655	1.05757	0.954326	0.889879	0.0780903	0.89321	0.299436	0.147364	0.0721822	0.0928429	0.0458314	0.078274	0.0134407	1.13677	0.887765	1.02048	0.844927	1.01125	0.847644	1.02648	1.01427	0.99284	1.07349	0.866366	0.87956	1.09332	1.01631	0.905078	1.00591	0.980305	0.884999	0.486785	0.252266	0.228239		S	2	___1	0.987916	2.40709e-13	134.4	96.238	123.61
A8JC49	35.2	not assigned.unknown	(original description: Flagellar associated protein OS=Chlamydomonas reinhardtii GN=FAP152 PE=4 SV=1)	0	0.977755	0.988673	0.98445	0.990926	1.00539	0.969109	0.0832673	0.127718	0.0947651	0.0185633	0.0141528	0.00563646	0.00832183	0.0182092	0.107393	0.95716	0.994	0.989063	0.982905	0.97263	0.98612	0.993199	0.999389	0.978167	0.998933	0.992797	0.991509	0.982321	0.997111	1.06353	0.991522	1.02627	0.852283	0.290089	0.252891	0.564715		S	2	___1	1	0.0116775	92.239	47.599	84.821
A8JH86	35.2	not assigned.unknown	(original description: Uncharacterized protein (Fragment) OS=Chlamydomonas reinhardtii GN=CHLREDRAFT_154359 PE=4 SV=1)	0	0.928544	0.942758	0.98238	0.948212	0.900872	0.984172	0.0912957	0.666747	0.181853	0.027451	0.109763	0.019583	0.0100158	0.0461008	0.0734721	0.946273	0.997772	0.959928	0.896924	0.816367	0.995935	0.942435	1.01414	0.991277	0.937032	0.854959	0.909146	0.956365	0.947159	1.05598	0.95124	0.900498	0.987386	0.0773021	0.253057	0.332434		S	2	___1	0.96743	0.000123493	118.5	82.98	116.04
P07753	1.1.1.2	PS.lightreaction.photosystem II.PSII polypeptide subunits	(gnl|cdd|79222 : 681.0) no description available & (p07753|psba_chlre : 665.0) Photosystem Q(B) protein (32 kDa thylakoid membrane protein) (Photosystem II protein D1) - Chlamydomonas reinhardtii & (atcg00020 : 631.0) Encodes chlorophyll binding protein D1, a part of the photosystem II reaction center core; photosystem II reaction center protein A (PSBA); FUNCTIONS IN: chlorophyll binding; INVOLV…	0	1.04847	0.935323	0.977888	0.996268	1.00429	0.932703	0.124221	0.732428	0.686589	0.0472736	0.0486646	0.105161	0.0274326	0.0783606	0.0216055	1.08576	0.897888	1.04971	1.06433	0.917747	1.02677	0.9953	0.990334	0.857183	1.01814	1.00458	0.909799	0.96549	0.925782	0.93559	1.00517	1.0825	0.95272	0.64174	0.25378	0.325987		T	2	___1	1	0.0110888	86.67	43.228	78.113
A8IWV0	27.3.26	RNA.regulation of transcription.MYB-related transcription factor family	(chl4|521436 : 1150.0) no description available & (at1g09770 : 510.0) Member of MYB3R- and R2R3- type MYB- encoding genes. Essential for plant innate immunity. Interacts with MOS4 and PRL1.; cell division cycle 5 (CDC5); FUNCTIONS IN: DNA binding, sequence-specific DNA binding transcription factor activity; INVOLVED IN: defense response signaling pathway, resistance gene-independent, defense resp…	0	1.27782	1.15122	1.15601	1.24082	1.17594	1.23897	0.777491	2.89898	1.50204	0.0681729	0.0143102	0.0140317	0.00969542	0.0250884	0.033931	1.34688	1.1676	1.16529	1.21057	1.14119	1.13987	1.27601	1.14485	1.16288	1.23415	1.19272	1.20865	1.25194	1.1471	1.27562	1.23637	1.18801	1.23265	0.821812	0.254323	0.607447		S	2	___1	1	2.5274e-05	143.58	105.64	91.616
A8J8G5	27.1.1	RNA.processing.splicing	(chl4|516153 : 453.0) no description available & (gnl|cdd|35336 : 157.0) no description available & (loc_os10g02630.1 : 157.0) no description available & (at3g50670 : 136.0) Encodes U1 snRNP 70K; U1 small nuclear ribonucleoprotein-70K (U1-70K); FUNCTIONS IN: RNA binding, nucleotide binding; INVOLVED IN: nuclear mRNA splicing, via spliceosome; LOCATED IN: nucleus; EXPRESSED IN: 23 plant structures…	Cre16.g656250.t1.1	0.975367	0.917652	1.00324	0.974171	0.943328	1.00625	0.0745551	0.370369	0.0148536	0.1098	0.0549967	0.0126927	0.177909	0.0751725	0.047686	0.954693	0.916775	0.99352	0.877374	0.973083	1.0176	1.09404	0.8631	0.998593	1.05537	0.856984	1.05257	1.09699	0.978788	1.00886	0.770149	0.994211	0.957308	0.65586	0.255836	0.463858		S	3	___1	0.999959	0.000416988	75.533	60.77	75.533
A8HYP5	35.2	not assigned.unknown	(original description: Intraflagellar transport protein 43 OS=Chlamydomonas reinhardtii GN=IFT43 PE=2 SV=1)	0	1.29419	1.19808	1.17148	1.2529	1.21102	1.29644	0.798594	1.1908	1.62916	0.0794339	0.0380508	0.0231696	0.0254338	0.0341487	0.0480316	1.38211	1.24198	1.14959	1.2276	1.17766	1.16909	1.27285	1.1746	1.19575	1.2287	1.24814	1.24824	1.25057	1.18095	1.3443	1.27941	1.20395	1.29679	0.823162	0.256079	0.330734		S	2	___1	1	8.36855e-92	235.79	198.27	178.52
A8IZJ6	35.2	not assigned.unknown	(original description: RWP-RK transcription factor OS=Chlamydomonas reinhardtii GN=RWP13 PE=4 SV=1)	0	0.946928	0.904101	0.864473	0.971515	0.910094	0.894775	0.481433	1.68488	0.0578822	0.0345003	0.00848122	0.0528155	0.0524742	0.0219271	0.0591846	0.907901	0.909175	0.891587	0.959518	0.89431	0.803608	0.973365	0.908819	0.898225	0.930528	0.913756	0.889457	0.953361	0.929959	0.956439	1.03066	0.886566	0.838429	0.560911	0.256723	0.901094		S	2	___1	0.989224	0.00282334	95.073	74.758	95.073
A8IIR1	35.2	not assigned.unknown	(original description: Predicted protein OS=Chlamydomonas reinhardtii GN=CHLREDRAFT_144235 PE=4 SV=1)	0	1.048	1.13662	1.12036	1.07366	1.14541	1.24945	2.26215	3.84997	1.68092	0.035381	0.0293894	0.017369	0.010544	0.0316139	0.0591198	1.08609	1.16975	1.10042	1.01616	1.12643	1.13216	1.04176	1.11368	1.12851	1.0657	1.14631	1.18653	1.08562	1.17657	1.30385	1.06966	1.11336	1.25798	0.764379	0.258027	0.452033		S	3	___1	1	2.43244e-20	192.65	160.94	97.073
A8JAF2	35.2	not assigned.unknown	(original description: Cilia- and flagella-associated protein 43 OS=Chlamydomonas reinhardtii GN=CFAP43 PE=1 SV=1)	0	0.952102	0.87282	0.862662	0.981823	0.883454	0.864707	0.388127	3.29795	0.104277	0.0504003	0.0178033	0.00707509	0.0103979	0.0591155	0.0293669	0.921436	0.888497	0.859796	0.9246	0.853465	0.87072	1.01027	0.8765	0.85747	0.976852	0.815524	0.833685	0.974844	0.911601	0.892078	0.993773	0.923236	0.868358	0.800972	0.259081	0.831138		S	2	___1	0.974895	0.0102591	91.592	72.381	91.592
A8IUC3	35.2	not assigned.unknown	(original description: Plastid ribosomal protein L32 OS=Chlamydomonas reinhardtii GN=PRPL32 PE=4 SV=1)	Cre07.g352850.t1.2	0.981864	1.07901	1.05143	1.03798	1.13971	1.17521	1.85519	1.78034	0.253293	0.0548936	0.0198403	0.125873	0.00836764	0.0309436	0.0270236	0.936428	1.06894	0.906277	0.966307	1.06623	1.11749	1.04286	1.10187	1.13052	1.03691	1.10419	1.145	1.04683	1.15412	1.19708	1.0302	1.16082	1.18355	0.102131	0.259574	0.575027		S	2	___1	1	3.63916e-18	186.74	154.24	186.74
A8J225	35.2	not assigned.unknown	(original description: Low-CO2-inducible protein (Fragment) OS=Chlamydomonas reinhardtii GN=LCI23 PE=4 SV=1)	Cre06.g281600.t2.1	1.00142	1.16194	1.02082	1.03066	1.13805	1.2154	0.92411	1.36741	0.981411	0.106365	0.0248344	0.156943	0.0301147	0.0378574	0.0606155	0.881879	1.19016	1.09872	1.03675	1.14342	0.840163	1.08562	1.15224	1.12357	1.02821	1.18164	1.15933	1.06193	1.1134	1.27972	1.00185	1.11912	1.20716	0.556412	0.259897	0.867708		S	2	___1	1	7.39795e-07	134.38	106.3	123.67
A8IWS4	35.2	not assigned.unknown	(original description: Paf1 complex component OS=Chlamydomonas reinhardtii GN=CHLREDRAFT_147410 PE=4 SV=1)	0	1.11438	0.931084	0.989537	1.06661	0.954669	1.1285	0.42636	1.50292	0.656454	0.0443795	0.131557	0.118268	0.0431749	0.104921	0.0186499	1.16511	0.863317	1.05398	1.08276	0.847228	1.06159	1.09527	1.08271	0.853044	1.06856	0.875393	1.1431	1.10878	1.07365	1.10749	1.02249	0.914967	1.1349	0.990229	0.261374	0.89823		S	3	___1	0.984821	8.99229e-06	92.563	62.147	50.851
A8J6C3	2.2.2.3	major CHO metabolism.degradation.starch.glucan water dikinase	(chl4|517507 : 907.0) no description available & (q2qtc2|pwd_orysa : 493.0) Phosphoglucan, water dikinase, chloroplast precursor (EC 2.7.9.5) - Oryza sativa (Rice) & (loc_os12g20150.1 : 493.0) no description available & (at5g26570 : 388.0) chloroplastidic phosphoglucan, water dikinase (PWD) which is required for normal degradation of leaf starch in Arabidopsis. NMR analysis of the mutants, sugges…	0	0.976399	1.01122	1.01101	0.980812	0.983579	1.09939	0.151401	0.277416	0.159877	0.100555	0.134071	0.138964	0.139712	0.133197	0.0212709	1.07659	0.856999	0.851041	0.875481	1.07667	1.08009	0.977128	1.1	1.1019	0.823894	0.832983	1.08263	1.0917	1.08593	1.12332	1.02684	1.03182	1.09223	0.900243	0.261876	0.849415		S	2	___1	0.976162	4.64772e-42	204.17	177.28	120.99
A8J1H4	35.2	not assigned.unknown	(original description: Predicted protein OS=Chlamydomonas reinhardtii GN=CHLREDRAFT_191810 PE=4 SV=1)	0	1.04158	0.998533	0.989816	1.11928	1.0756	1.00083	0.490378	0.341003	0.0728254	0.113327	0.116115	0.138155	0.0119241	0.0320649	0.176437	0.910754	1.04765	1.09595	1.10428	1.08202	0.833606	1.10969	0.865932	1.03989	1.11994	1.04081	0.79904	1.13086	1.10397	1.12603	1.10704	1.08201	1.07742	0.791106	0.26217	0.31606		Y	3	___2	0.995999	0.0243778	58.997	38.758	58.997
A8J2L0	35.2	not assigned.unknown	(original description: Predicted protein OS=Chlamydomonas reinhardtii GN=CHLREDRAFT_149734 PE=4 SV=1)	Cre03.g152150.t1.2	0.96489	1.00433	0.999245	0.985171	0.987479	0.916773	0.255329	0.108262	0.199804	0.141203	0.0106173	0.00624831	0.164522	0.00525565	0.061405	1.12643	1.01634	0.992243	0.903253	1.00047	1.00425	0.864984	0.99619	1.00124	1.06195	0.993159	0.987675	0.796295	0.982787	0.881843	1.09727	0.986493	0.880801	0.554487	0.262682	0.680346		S	2	___1	0.997738	3.26109e-12	126.26	95.615	98.76
A8IRH1	27.3.60	RNA.regulation of transcription.NIN-like bZIP-related family	(chl4|521163 : 926.0) no description available & (loc_os06g12360.1 : 94.0) no description available & (at5g66990 : 90.5) RWP-RK domain-containing protein; CONTAINS InterPro DOMAIN/s: Plant regulator RWP-RK (InterPro:IPR003035); BEST Arabidopsis thaliana protein match is: RWP-RK domain-containing protein (TAIR:AT1G74480.1); Has 1807 Blast hits to 1807 proteins in 277 species: Archae - 0; Bacteria …	Cre03.g184600.t1.1	0.993689	1.03074	1.0588	1.0108	1.06021	1.1495	1.81144	3.03851	0.738847	0.0550407	0.0238408	0.00747747	0.0166384	0.00781943	0.0557901	1.04316	1.00763	1.05038	0.9344	1.02936	1.06136	1.00351	1.05525	1.06467	1.01332	1.06922	1.09082	1.02604	1.05615	1.20186	0.993047	1.05525	1.15581	0.416878	0.263115	0.626453		S	2	___1	1	1.82233e-33	160.56	135	83.53
A8J225	35.2	not assigned.unknown	(original description: Low-CO2-inducible protein (Fragment) OS=Chlamydomonas reinhardtii GN=LCI23 PE=4 SV=1)	Cre06.g281600.t2.1	1.3475	1.27501	1.15515	1.28542	1.33793	1.41401	1.29776	0.0954008	1.69638	0.0882661	0.0902163	0.0894654	0.0164241	0.0505487	0.126595	1.41343	1.18957	1.11904	1.24723	1.26612	1.25703	1.38186	1.36934	1.08939	1.27608	1.32861	1.31522	1.2758	1.2927	1.55671	1.30439	1.3925	1.37009	0.504863	0.264039	0.488645		S	2	___2	1	1.10107e-99	248.94	172.36	155.94
A8J225	35.2	not assigned.unknown	(original description: Low-CO2-inducible protein (Fragment) OS=Chlamydomonas reinhardtii GN=LCI23 PE=4 SV=1)	Cre06.g281600.t2.1	1.3475	1.27501	1.15515	1.28542	1.33793	1.41401	1.29776	0.0954008	1.69638	0.0882661	0.0902163	0.0894654	0.0164241	0.0505487	0.126595	1.41343	1.18957	1.11904	1.24723	1.26612	1.25703	1.38186	1.36934	1.08939	1.27608	1.32861	1.31522	1.2758	1.2927	1.55671	1.30439	1.3925	1.37009	0.504863	0.264039	0.488645		S	2	___2	1	3.20775e-208	284.15	249.11	248.94
Q6S7R9	8.3	TCA / org transformation.carbonic anhydrases	(chl4|512520 : 501.0) no description available & (gnl|cdd|73356 : 196.0) no description available & (ipr001765 : 137.1996) Carbonic anhydrase & (gnl|cdd|36791 : 83.5) no description available (original description: Carbonic anhydrase OS=Chlamydomonas reinhardtii GN=Cah6 PE=2 SV=1)	Cre12.g485050.t1.2	0.964126	0.93283	0.970398	0.915123	0.977766	1.01219	0.215181	0.626111	0.633805	0.0690274	0.0641385	0.0328868	0.0171318	0.0444874	0.0572112	1.04206	0.864322	1.00632	0.910666	0.942717	0.941763	0.939658	0.99145	0.963115	0.928935	1.02191	0.953563	0.920482	0.978444	1.06787	0.895953	0.932943	1.01515	0.966017	0.264646	0.684677		S	2	___1	0.992692	0.0113122	105.4	54.061	100.82
A8J0E4	1.1.1.2	PS.lightreaction.photosystem II.PSII polypeptide subunits	(chl4|519678 : 481.0) no description available & (p12853|psbo_chlre : 478.0) Oxygen-evolving enhancer protein 1, chloroplast precursor (OEE1) - Chlamydomonas reinhardtii & (gnl|cdd|65505 : 354.0) no description available & (at5g66570 : 286.0) Encodes a protein which is an extrinsic subunit of photosystem II and which has been proposed to play a central role in stabilization of the catalytic manga…	Cre09.g396213.t1.1	1.02209	1.00704	1.02634	0.952245	1.0074	1.01553	0.34673	0.138394	0.16967	0.133344	0.0241968	0.0124616	0.110623	0.00728926	0.0302293	1.111	1.02353	1.03255	1.0865	1.01833	1.01199	0.868767	0.979264	1.03447	1.03085	1.01013	0.984692	0.825746	1.01293	1.01679	1.00014	0.999138	1.04511	0.20086	0.265826	0.349835		S	2	___1	0.999997	4.02775e-12	170.16	131.93	170.16
A8HYQ9	27.1.1	RNA.processing.splicing	(chl4|522838 : 404.0) no description available & (loc_os09g31482.3 : 301.0) no description available & (at5g42820 : 291.0) U2 auxiliary factor small subunit. The atU2AF35b protein and its homolog, atU2AF35a, contain most of the conserved domains of hsU2AF35, including the psiRRM, one RS domain, two zinc fingers, and the two regions for interacting with U2AF large subunit. Both proteins lack the s…	Cre06.g250950.t1.2	0.882712	0.897825	0.919909	0.810351	0.873105	0.814694	2.20105	0.480456	0.514902	0.0716275	0.0470355	0.0106563	0.0434297	0.043471	0.00379974	0.951029	0.869421	0.924636	0.888928	0.871937	0.927383	0.808179	0.952118	0.907707	0.763876	0.876822	0.811917	0.817272	0.914599	0.81314	0.849904	0.827895	0.819024	0.0742957	0.266306	0.260141		T	3	___1	0.820704	0.000544707	131.12	95.671	74.962
A8IZH4	35.2	not assigned.unknown	(original description: Predicted protein OS=Chlamydomonas reinhardtii GN=CHLREDRAFT_191191 PE=4 SV=1)	0	0.896564	1.10204	0.863866	0.808084	0.89737	0.816597	3.44369	3.78837	1.3718	0.00871469	0.0772378	0.0128028	0.0644836	0.0549229	0.0322885	0.891049	1.15915	0.85715	0.906611	1.01416	0.87863	0.892032	1.13282	0.85582	0.881521	0.86511	0.811168	0.760717	0.960786	0.787367	0.782013	0.866213	0.851256	0.299598	0.266745	0.233912		S	3	___3	1	0.00275658	41.734	18.341	41.734
A8ISF6	29.4	protein.postranslational modification	(chl4|516829 : 1648.0) no description available & (gnl|cdd|35413 : 131.0) no description available & (gnl|cdd|88314 : 117.0) no description available & (loc_os05g50190.1 : 87.4) no description available & (at3g63260 : 87.0) protein kinase, similar to mammal mixed-lineage kinase and Raf protein kinase; ATMRK1; FUNCTIONS IN: protein serine/threonine/tyrosine kinase activity, kinase activity; INVOLV…	0	1.06295	0.879071	0.921348	1.0324	0.953776	0.980694	0.970734	3.35469	0.982816	0.0653715	0.0251245	0.0186023	0.0363314	0.0428869	0.0466293	1.11712	0.852622	0.900475	0.99034	0.902619	0.927393	1.0814	0.881971	0.936176	1.02434	0.92215	0.977072	1.00077	0.936586	1.02903	1.07208	1.00259	0.935981	0.847276	0.267403	0.631034		S	2	___1	0.999998	0.0112393	93.195	26.766	93.195
A8HPX0	35.2	not assigned.unknown	(original description: Predicted protein OS=Chlamydomonas reinhardtii GN=CHLREDRAFT_171599 PE=4 SV=1)	0	0.915464	0.880053	0.999626	0.838662	0.909432	0.864278	1.48213	0.628603	1.23423	0.0840414	0.0445976	0.0671899	0.0420147	0.0405525	0.0169568	1.00648	0.83311	0.949611	0.899118	0.92186	1.076	0.840797	0.88519	0.973269	0.799151	0.886108	0.867448	0.834038	0.956257	0.84596	0.882798	0.885929	0.879426	0.242024	0.26932	0.684619		S	3	___1	0.800465	9.64586e-08	114.78	93.165	57.432
A8J6C3	2.2.2.3	major CHO metabolism.degradation.starch.glucan water dikinase	(chl4|517507 : 907.0) no description available & (q2qtc2|pwd_orysa : 493.0) Phosphoglucan, water dikinase, chloroplast precursor (EC 2.7.9.5) - Oryza sativa (Rice) & (loc_os12g20150.1 : 493.0) no description available & (at5g26570 : 388.0) chloroplastidic phosphoglucan, water dikinase (PWD) which is required for normal degradation of leaf starch in Arabidopsis. NMR analysis of the mutants, sugges…	0	0.904846	0.942256	1.06245	0.904024	1.02251	1.06907	0.418218	2.33448	0.27621	0.0101912	0.0959557	0.0153363	0.125803	0.0291493	0.0268116	0.893462	0.831697	1.07779	0.913118	0.991212	1.04712	0.90796	1.00386	1.06244	0.946734	0.989547	1.0947	1.00291	1.04489	1.07129	0.762427	1.03309	1.04121	0.42672	0.2698	0.676593		S	2	___2	0.966311	9.51198e-150	264.01	203.38	264.01
A8JAH1	35.2	not assigned.unknown	(original description: Reticulon-like protein OS=Chlamydomonas reinhardtii GN=CHLREDRAFT_151947 PE=4 SV=1)	Cre16.g689087.t1.1	1.15779	1.04554	1.0362	1.0465	1.11583	1.16945	0.237001	0.0313057	0.698286	0.0768647	0.156413	0.137936	0.169163	0.0219566	0.0138936	1.24654	1.11807	1.11608	1.1139	0.866029	1.11559	1.11292	1.15252	0.876924	1.14967	1.09117	1.18077	1.13857	1.12308	1.15395	0.851275	1.13325	1.17363	0.716556	0.269884	0.970321		S	3	___1	0.811677	3.3077e-07	81.943	59.746	63.433
Q6SA05	1.3.13	PS.calvin cycle.rubisco interacting	(chl4|522260 : 818.0) no description available & (p23489|rca_chlre : 816.0) Ribulose bisphosphate carboxylase/oxygenase activase, chloroplast precursor (RuBisCO activase) (RA) - Chlamydomonas reinhardtii & (loc_os11g47970.1 : 511.0) no description available & (at2g39730 : 506.0) Rubisco activase, a nuclear-encoded chloroplast protein that consists of two isoforms arising from alternative splicing…	Cre04.g229300.t1.1	1.5191	1.21698	1.42343	1.48235	1.45152	1.57751	1.09764	1.13434	0.657552	0.0804165	0.289429	0.00338463	0.030905	0.0640927	0.0784239	1.60952	0.883705	1.41973	1.45558	1.36212	1.42418	1.49222	1.40513	1.42638	1.44668	1.52133	1.49451	1.49913	1.39534	1.65037	1.50123	1.43789	1.58765	0.448835	0.270131	0.252863		S	2	___1	1	2.08836e-224	287.31	192.11	221.99
A8IWL3	35.2	not assigned.unknown	(original description: Predicted protein OS=Chlamydomonas reinhardtii GN=CHLREDRAFT_190448 PE=4 SV=1)	0	1.00694	0.943096	0.901967	0.917514	0.913588	0.82833	1.09663	1.01914	0.121007	0.0524515	0.0573138	0.0697363	0.12212	0.0439843	0.0518127	0.948613	0.980127	0.978091	1.05024	0.972081	0.841167	1.02195	0.877079	0.886642	1.05198	0.869705	0.825208	0.81351	0.957673	0.778149	0.887051	0.913387	0.881634	0.489405	0.270993	0.509957		S	3	___1	0.999995	0.00680616	66.606	37.737	66.606
A8JHN0	35.2	not assigned.unknown	(original description: Predicted protein OS=Chlamydomonas reinhardtii GN=CHLREDRAFT_195092 PE=4 SV=1)	Cre12.g561500.t1.2	1.10106	1.04664	0.82068	1.0435	0.939203	0.844654	0.278457	1.28426	0.119772	0.21081	0.0118792	0.063509	0.224616	0.198344	0.0439067	1.26621	1.03471	0.869161	1.17335	1.05847	0.748789	0.863611	1.04673	0.84409	1.14539	0.785243	0.893381	0.785993	0.86934	0.832416	1.19911	1.16303	0.808165	0.503185	0.271989	0.379501		S	2	___1	1	1.69335e-26	195.45	159.64	71.742
A8J3C7	26.14	misc.oxygenases	(chl4|511975 : 611.0) no description available & (at2g01490 : 326.0) phytanoyl-CoA dioxygenase (PhyH) family protein; FUNCTIONS IN: phytanoyl-CoA dioxygenase activity; INVOLVED IN: N-terminal protein myristoylation; LOCATED IN: plasma membrane; EXPRESSED IN: 25 plant structures; EXPRESSED DURING: 15 growth stages; CONTAINS InterPro DOMAIN/s: Phytanoyl-CoA dioxygenase (InterPro:IPR008775); Has 292…	Cre16.g673281.t1.1	0.989507	0.972877	0.966069	0.98099	1.00587	1.03616	1.21923	0.164454	0.823359	0.0406324	0.0358131	0.0212302	0.0157536	0.0506013	0.00704993	1.03042	1.00532	0.943343	0.949165	0.978858	0.969472	0.988933	0.934451	0.985392	0.97478	1.0642	1.03155	0.969288	0.979558	1.04428	0.998902	0.973839	1.03266	0.453722	0.272218	0.258925		S	2	___1	0.960329	3.65605e-06	169.58	133.3	136.3
A8IIK4	27.3.99	RNA.regulation of transcription.unclassified	(chl4|510026 : 765.0) no description available & (loc_os07g11110.1 : 279.0) no description available & (at3g63140 : 275.0) Encodes a protein with ribonuclease activity that is involved in plastid rRNA maturation.; chloroplast stem-loop binding protein of 41 kDa (CSP41A); FUNCTIONS IN: mRNA binding, poly(U) RNA binding; INVOLVED IN: rRNA processing; LOCATED IN: in 6 components; EXPRESSED IN: 25 pl…	Cre10.g440050.t1.2	1.03877	1.01004	1.04243	1.04724	1.01247	0.91187	0.594804	0.512449	0.702322	0.108573	0.0321691	0.0192868	0.0429544	0.0477873	0.112348	0.920945	0.972947	1.04111	1.06057	1.02681	1.06234	1.13478	1.03035	1.02384	1.06358	0.96029	1.02661	0.998517	1.0541	0.802074	1.07963	1.02302	0.906928	0.450533	0.272309	0.39119		S	2	___1	0.959423	0.000501421	139.31	56.881	123.69
A8IBV4	35.2	not assigned.unknown	(original description: Predicted protein OS=Chlamydomonas reinhardtii GN=CHLREDRAFT_140970 PE=4 SV=1)	0	0.967587	1.06934	0.895877	0.97702	0.831386	0.855662	0.950286	0.493366	0.77922	0.211929	0.0679066	0.0718771	0.113563	0.0781765	0.00308194	1.20432	1.04448	0.977246	0.90292	1.01737	0.841026	0.795525	1.14618	0.86936	1.04766	0.742524	0.858793	0.846023	0.862062	0.855562	1.03738	0.889573	0.852631	0.159689	0.272795	0.934916		S	3	___1	0.817666	2.77014e-05	56.984	30.979	41.133
A8IZM8	35.2	not assigned.unknown	(original description: Predicted protein (Fragment) OS=Chlamydomonas reinhardtii GN=CHLREDRAFT_94998 PE=4 SV=1)	0	0.91912	0.918196	0.930981	0.917952	0.937851	0.972447	0.836937	0.864842	0.371335	0.0217373	0.0358083	0.0208369	0.0217872	0.0139848	0.0398999	0.941177	0.891037	0.907284	0.918468	0.904774	0.946437	0.897717	0.958776	0.939223	0.893801	0.953995	0.926376	0.936128	0.930103	0.995769	0.923929	0.929456	0.995196	0.639165	0.27375	0.577751		S	2	___1	1	3.54557e-06	124.12	103.29	97.779
A8IGD9	35.2	not assigned.unknown	(original description: Low-CO2-inducible protein OS=Chlamydomonas reinhardtii GN=LCI5 PE=4 SV=1)	0	0.886236	0.923606	0.955103	0.826724	1.06287	1.18034	1.03606	1.57104	0.847556	0.0232728	0.131407	0.165633	0.045746	0.135872	0.132062	0.903535	1.07506	0.836397	0.895396	0.839841	0.884587	0.859777	0.85592	1.14432	0.862697	1.14785	1.15147	0.775239	1.1346	1.32445	0.842236	0.906169	1.0651	0.386658	0.274604	0.900326		S	2	___2	0.949778	1.1598e-42	190.18	156.39	181.97
A8JHY1	35.2	not assigned.unknown	(chl4|513193 : 2505.0) no description available & (ipr012334 : 90.4357) Pectin lyase fold & (at1g53800 : 80.5) unknown protein; BEST Arabidopsis thaliana protein match is: unknown protein (TAIR:AT1G53250.1); Has 35333 Blast hits to 34131 proteins in 2444 species: Archae - 798; Bacteria - 22429; Metazoa - 974; Fungi - 991; Plants - 531; Viruses - 0; Other Eukaryotes - 9610 (source: NCBI BLink). (o…	0	0.887957	1.03082	1.04907	1.02265	1.05906	1.08945	4.23482	5.2026	2.38771	0.0365459	0.0112808	0.0125211	0.00894278	0.0312316	0.0268516	0.930136	1.02093	1.0456	0.868002	1.02842	1.06297	0.865733	1.0431	1.03866	1.01687	1.02935	1.05958	1.01814	1.09162	1.09716	1.03295	1.05621	1.1116	0.384941	0.274648	0.250553		S	3	___1	0.995155	0.000387214	73.405	55.171	69.255
A8JAH1	35.2	not assigned.unknown	(original description: Reticulon-like protein OS=Chlamydomonas reinhardtii GN=CHLREDRAFT_151947 PE=4 SV=1)	Cre16.g689087.t1.1	1.15779	0.943874	1.02418	1.12235	1.11583	1.16945	1.08801	0.64435	0.66255	0.0768647	0.180881	0.158752	0.0381046	0.0219566	0.0138936	1.24654	0.831383	1.11608	1.1139	0.847714	1.11559	1.11292	1.15252	0.840868	1.14967	1.09117	1.18077	1.13857	1.12308	1.15395	1.07882	1.13325	1.17363	0.57768	0.275867	0.411751		T	3	___1	0.766897	3.3077e-07	81.943	59.746	44.164
P42380	29.5.5	protein.degradation.serine protease	(p42380|clpp_chlre : 934.0) ATP-dependent Clp protease proteolytic subunit (EC 3.4.21.92) (Endopeptidase Clp) - Chlamydomonas reinhardtii & (gnl|cdd|79246 : 190.0) no description available & (gnl|cdd|36058 : 137.0) no description available & (ipr001907 : 104.01681) Peptidase S14, ClpP & (loc_os02g42290.2 : 84.0) no description available & (at5g45390 : 82.8) One of several nuclear-encoded ClpPs (c…	0	1.14015	0.984538	1.00299	0.970955	0.993588	0.96685	1.01496	0.6125	0.805122	0.0336372	0.0162606	0.0126499	0.148884	0.0267138	0.105537	1.17784	0.97149	1.00072	1.12943	0.979369	0.991633	1.11318	1.00275	1.01663	0.803598	1.02061	1.02343	1.02057	0.967198	0.845087	1.08869	0.992953	1.03203	0.358494	0.276203	0.894286		S	2	___1	0.995391	4.80056e-09	150.23	115.46	114.56
A8J246	35.2	not assigned.unknown	(original description: Coiled-coil domain 6-like protein OS=Chlamydomonas reinhardtii GN=CHLREDRAFT_191672 PE=4 SV=1)	Cre06.g282900.t1.2	1.14411	1.11043	1.13181	1.03251	1.11414	1.18881	0.197799	0.576207	0.766199	0.0154622	0.0145761	0.0068554	0.170695	0.0265384	0.0474099	1.16138	1.11463	1.13211	1.1394	1.09421	1.13851	1.13155	1.12244	1.12481	1.1186	1.12899	1.13591	1.14302	1.12993	1.22747	0.835915	1.0835	1.20303	0.602519	0.277016	0.473619		S	2	___1	0.999257	8.24819e-10	177.36	150.61	166.62
A8IP08	35.2	not assigned.unknown	(original description: Predicted protein OS=Chlamydomonas reinhardtii GN=CHLREDRAFT_188940 PE=4 SV=1)	0	0.974904	0.857067	0.883623	1.02753	0.886145	0.887624	0.481531	2.30313	0.105946	0.110644	0.0299557	0.0600762	0.0365245	0.0562513	0.011327	0.922602	0.832551	0.895359	0.900106	0.848194	0.818545	1.102	0.890457	0.936965	1.00049	0.853928	0.878698	1.01302	0.85341	0.900367	1.06908	0.951098	0.883808	0.628045	0.277106	0.924433		S	2	___1	1	3.76993e-05	157.37	84.85	144.18
A8J431	35.2	not assigned.unknown	(original description: Chlorophyll a-b binding protein, chloroplastic OS=Chlamydomonas reinhardtii GN=LHCSR3 PE=3 SV=1)	#N/A	1.01662	0.880883	0.960787	0.995082	1.06926	1.06692	1.30279	0.135908	0.795792	0.145851	0.0748875	0.105352	0.0427694	0.0597492	0.0600705	1.11477	0.832881	1.03886	0.849027	0.967174	1.00255	1.08608	0.842595	0.840957	1.00681	1.13398	1.11619	0.947671	1.01621	1.08457	1.03076	1.05758	1	0.38781	0.277472	0.27033		T	3	___2	0.887315	1.54288e-63	213.57	170.19	44.878
A8J526	35.2	not assigned.unknown	(original description: Predicted protein (Fragment) OS=Chlamydomonas reinhardtii GN=CHLREDRAFT_150094 PE=4 SV=1)	0	1.16019	1.11056	1.06445	1.19128	1.0596	1.20036	0.331899	0.41645	0.44212	0.0500979	0.0408635	0.208568	0.00605239	0.150818	0.0266632	1.11271	1.07182	1.16047	1.21255	1.10661	0.82516	1.1553	1.15326	1.2077	1.19032	1.09797	1.17707	1.19776	1.18753	1.19458	1.18577	0.893308	1.22944	0.356953	0.277615	0.55284		S	2	___1	0.999938	1.65093e-20	193.45	144.17	162.67
A8JAW4	29.5	protein.degradation	(chl4|515051 : 666.0) no description available & (gnl|cdd|37987 : 382.0) no description available & (loc_os05g28280.1 : 358.0) no description available & (at3g51800 : 350.0) putative nuclear DNA-binding protein G2p (AtG2) mRNA,; ATG2; FUNCTIONS IN: metalloexopeptidase activity, aminopeptidase activity; INVOLVED IN: proteolysis, cellular process; EXPRESSED IN: 22 plant structures; EXPRESSED DURING…	#N/A	1.41162	1.31818	1.17632	1.38991	1.15876	1.20465	0.230801	0.728746	0.158712	0.106878	0.0322727	0.257029	0.0199115	0.27056	0.271408	1.53428	1.35533	1.32916	1.33849	1.29704	0.879576	1.3621	1.30217	1.32023	1.39383	0.846359	1.36578	1.40756	1.31194	1.35688	1.36833	1.31797	0.891297	0.341307	0.277953	0.423638		S	2	___2	1	2.73099e-23	179.87	126.31	102.47
A8JBE1	35.2	not assigned.unknown	(original description: DnaJ-like protein OS=Chlamydomonas reinhardtii GN=DNJ4 PE=4 SV=1)	0	1.13716	1.23144	1.23278	1.18367	1.23333	1.33873	1.50628	2.84239	0.763505	0.0873744	0.0206805	0.0303733	0.0164397	0.0296287	0.043312	1.2102	1.24973	1.19964	1.04037	1.209	1.2593	1.16093	1.23558	1.23939	1.18529	1.25007	1.29118	1.19924	1.25081	1.37592	1.16648	1.19912	1.3491	0.551596	0.278729	0.692489		S	2	___1	1	3.20926e-158	259.81	208.74	195.09
A8J431	35.2	not assigned.unknown	(original description: Chlorophyll a-b binding protein, chloroplastic OS=Chlamydomonas reinhardtii GN=LHCSR3 PE=3 SV=1)	#N/A	1.02023	0.886044	0.967689	0.995082	1.06926	1.06692	1.28895	0.152954	0.855074	0.139646	0.0719031	0.0935996	0.0427694	0.0597492	0.0600705	1.11477	0.860762	1.03886	0.859828	0.967174	1.00255	1.08608	0.830197	0.861662	1.00681	1.13398	1.11619	0.947671	1.01621	1.08457	1.03076	1.05758	1	0.395974	0.279181	0.276901		T	3	___2	0.988201	1.54288e-63	213.57	170.19	63.979
A8IYQ7	35.2	not assigned.unknown	(original description: Predicted protein (Fragment) OS=Chlamydomonas reinhardtii GN=CHLREDRAFT_148132 PE=4 SV=1)	0	0.988231	0.900733	0.8941	0.947848	0.91997	0.926416	0.0711622	1.34456	0.535587	0.0358212	0.0626899	0.0546864	0.0246464	0.032071	0.00568539	0.950618	0.939698	0.873464	1.02194	0.934083	0.956102	0.992134	0.828417	0.852734	0.920864	0.884387	0.932534	0.95351	0.92888	0.925417	0.969171	0.946645	0.921296	0.773434	0.279689	0.359818		S	2	___1	0.988395	0.000512432	106.76	80.345	106.76
A2T2X4	35.2	not assigned.unknown	(original description: Intraflagellar transport protein 46 OS=Chlamydomonas reinhardtii GN=IFT46 PE=1 SV=1)	0	0.983904	0.934049	0.96168	0.990211	0.897327	0.901974	0.898664	1.71511	0.445926	0.0607035	0.0316684	0.0229403	0.0263606	0.0285445	0.0479653	0.930999	0.898373	0.946553	1.05018	0.958836	0.988075	0.970535	0.944938	0.950412	0.962217	0.891394	0.918212	1.01456	0.928372	0.847998	0.993859	0.872215	0.939714	0.959095	0.28051	0.607911		S	3	___1	0.999966	1.86127e-10	151.38	135.4	151.38
Q65Z16	35.2	not assigned.unknown	(original description: NSG17 protein OS=Chlamydomonas reinhardtii GN=NSG17 PE=2 SV=1)	Cre14.g620850.t1.2	1.00827	0.999869	0.909105	0.992884	0.95045	1.06993	0.272445	0.0373792	0.649728	0.0934723	0.0939356	0.12531	0.152549	0.102115	0.0221983	0.903475	0.898984	1.0533	1.03831	1.01581	0.8266	1.08304	1.08482	0.847415	0.816745	1.01372	1.05617	1.08255	1.00498	1.05807	1.07935	0.832646	1.09553	0.913998	0.281164	0.983298		S	2	___1	0.996466	1.0429e-18	183.18	138.25	92.474
A8IVH2	35.2	not assigned.unknown	(chl4|513623 : 516.0) no description available & (at1g65230 : 100.0) Uncharacterized conserved protein (DUF2358); FUNCTIONS IN: molecular_function unknown; INVOLVED IN: biological_process unknown; LOCATED IN: chloroplast; EXPRESSED IN: 21 plant structures; EXPRESSED DURING: 13 growth stages; CONTAINS InterPro DOMAIN/s: Protein of unknown function DUF2358 (InterPro:IPR018790); Has 45 Blast hits to…	Cre12.g536800.t1.2	0.963401	1.07169	1.06845	0.959213	1.05913	1.14089	0.198036	1.59704	0.211436	0.147067	0.0350493	0.0195398	0.107703	0.0454256	0.0451203	1.1282	1.11193	1.09102	0.916503	1.04778	1.05708	0.845503	1.05537	1.05726	0.842907	1.11125	1.09892	1.05551	1.02795	1.18861	0.979227	1.0382	1.13513	0.352226	0.281769	0.481924		S	2	___1	1	8.57241e-11	181.69	103.18	181.69
A8JGM1	35.2	not assigned.unknown	(chl4|512786 : 454.0) no description available & (at5g23060 : 94.7) Encodes a chloroplast-localized protein that modulates cytoplasmic Ca2+ concentration and is crucial for proper stomatal regulation in response to elevations of external Ca2+.; calcium sensing receptor (CaS); INVOLVED IN: regulation of stomatal closure, cellular response to calcium ion; LOCATED IN: thylakoid, mitochondrion, chlor…	#N/A	1.07098	1.03898	0.997574	1.07653	1.03089	0.951407	0.157691	0.760929	0.0626632	0.186629	0.0280643	0.085137	0.0274858	0.0213234	0.0139651	1.20206	1.00948	1.08587	1.15357	1.06534	0.990862	0.857306	1.04211	0.915991	1.10216	1.05416	0.963434	1.0475	1.01228	0.936091	1.07993	1.02624	0.954698	0.440382	0.281878	0.279613		S	2	___1	0.999646	2.22544e-49	200.73	144.95	141.6
A8IPZ5	35.2	not assigned.unknown	(original description: Outer dynein arm-docking complex subunit 1 OS=Chlamydomonas reinhardtii GN=ODA3 PE=1 SV=1)	Cre17.g703850.t1.2	1.06372	1.0311	1.13217	1.11405	1.15753	1.08334	0.291071	0.0137171	0.267118	0.143062	0.162571	0.0247887	0.0170237	0.0219248	0.24298	1.17098	1.12941	1.10463	0.901283	1.12044	1.15268	1.11889	0.843449	1.13921	1.10554	1.1823	1.1734	1.10296	1.14965	1.26844	1.13365	1.14063	0.808193	0.578354	0.282276	0.967201		S	2	___1	1	1.74113e-05	125.36	96.975	76.943
A8IW11	35.2	not assigned.unknown	(original description: Predicted protein OS=Chlamydomonas reinhardtii GN=CHLREDRAFT_190358 PE=4 SV=1)	0	0.921494	0.97231	1.01527	0.877732	0.851919	0.847208	2.38926	0.145842	0.524733	0.0600115	0.0796378	0.00980439	0.0408278	0.0241124	0.118964	0.986277	1.0269	1.0109	0.910403	1.0091	1.0084	0.867802	0.880928	1.02649	0.842095	0.870069	0.831626	0.922279	0.861128	0.973195	0.86882	0.824559	0.736802	0.000627106	0.28311	0.146536		S	2	___2	0.820169	1.73331e-129	201.85	149.03	201.85
A8J7Q3	35.2	not assigned.unknown	(original description: Predicted protein OS=Chlamydomonas reinhardtii GN=CHLREDRAFT_192386 PE=4 SV=1)	0	0.97099	0.848677	0.838832	0.970378	0.843292	0.850275	0.0250755	2.70722	0.0170089	0.0983675	0.0516473	0.0150319	0.0445651	0.0317296	0.0408064	0.951238	0.789999	0.853302	0.883998	0.868791	0.823295	1.07774	0.887242	0.839899	0.919712	0.807619	0.817874	0.987916	0.853893	0.896103	1.00351	0.868364	0.836848	0.794241	0.283325	0.736559		S	2	___1	0.989014	1.1529e-05	137.73	111.37	137.73
A8ITA7	27.3.67	RNA.regulation of transcription.putative transcription regulator	(chl4|522218 : 849.0) no description available & (gnl|cdd|86527 : 200.0) no description available & (gnl|cdd|37361 : 178.0) no description available & (loc_os03g44900.2 : 151.0) no description available & (at5g18230 : 132.0) transcription regulator NOT2/NOT3/NOT5 family protein; FUNCTIONS IN: transcription regulator activity; INVOLVED IN: negative regulation of transcription, regulation of transc…	0	1.08437	0.867554	0.833819	0.911383	0.867401	0.873644	0.855597	2.66816	1.67483	0.04536	0.02923	0.0453098	0.111938	0.0304895	0.05346	1.13662	0.833851	0.815623	1.06144	0.882833	0.885399	1.05506	0.885977	0.800436	0.84205	0.897115	0.814842	0.851578	0.868896	0.886777	1.04052	0.836191	0.919315	0.509203	0.28405	0.858228		S	2	___1	0.99999	7.70813e-05	74.278	37.069	74.278
A8JFG3	31.1	cell.organisation	(p46869|fla10_chlre : 1218.0) Kinesin-like protein FLA10 (Protein KHP1) - Chlamydomonas reinhardtii & (chl4|517742 : 1218.0) no description available & (gnl|cdd|30093 : 587.0) no description available & (gnl|cdd|39481 : 521.0) no description available & (ipr001752 : 300.60904) Kinesin, motor domain & (at3g17360 : 254.0) PHRAGMOPLAST ORIENTING KINESIN 1 is one of the two Arabidopsis homologs isola…	Cre17.g730950.t1.2	1.13867	0.911841	1.04307	0.956377	0.993798	1.00738	0.450674	0.573206	0.949779	0.0047095	0.141725	0.0112598	0.165337	0.0911254	0.0625047	1.13802	1.07508	1.05163	1.14368	0.840221	1.03031	1.13432	0.820219	1.04727	1.14599	1.07258	1.04111	0.84226	0.894003	0.935259	0.880887	1.01481	1.04578	0.968748	0.284563	0.85932		S	2	___1	0.995533	1.3304e-23	185.2	136.76	185.2
A8JAW4	29.5	protein.degradation	(chl4|515051 : 666.0) no description available & (gnl|cdd|37987 : 382.0) no description available & (loc_os05g28280.1 : 358.0) no description available & (at3g51800 : 350.0) putative nuclear DNA-binding protein G2p (AtG2) mRNA,; ATG2; FUNCTIONS IN: metalloexopeptidase activity, aminopeptidase activity; INVOLVED IN: proteolysis, cellular process; EXPRESSED IN: 22 plant structures; EXPRESSED DURING…	#N/A	1.41162	1.31818	1.1613	1.38991	1.15308	1.21054	0.197019	0.716485	0.187402	0.106878	0.0322727	0.283036	0.0199115	0.28039	0.261213	1.53428	1.35533	1.32916	1.33849	1.29704	0.834523	1.3621	1.30217	1.32023	1.39383	0.829332	1.36578	1.40756	1.31194	1.35688	1.36833	1.31797	0.908959	0.341484	0.284964	0.42595		S	2	___2	1	9.73026e-24	181.54	142.11	102.47
A8IR69	28.1.3.2.1	DNA.synthesis/chromatin structure.histone.core.H2A	(loc_os01g05970.1 : 165.0) no description available & (chl4|517389 : 154.0) no description available & (p50565|h2b1_chlre : 153.0) Histone H2B.1 (H2B-I) - Chlamydomonas reinhardtii & (at5g22880 : 142.0) Encodes a histone 2B (H2B) protein. This protein can be ubiquitinated in planta, and this modification depends on the HUB1 and HUB2 E3 ubiquitin ligases.; histone B2 (HTB2); FUNCTIONS IN: DNA bind…	Cre17.g709150.t1.2	0.951926	0.906666	0.862108	1.00628	0.857365	0.852189	0.0168689	1.57915	0.335246	0.0467886	0.144375	0.0178402	0.0106219	0.0382631	0.0705579	0.948041	0.918128	0.882644	0.9072	0.7569	0.850436	1.00054	1.04497	0.853243	1.01152	0.842904	0.804276	0.994051	0.828441	0.933212	1.01326	0.900751	0.819078	0.67434	0.285494	0.531785		S	2	___1	0.999666	0.00249856	115.7	57.103	105.17
A8J526	35.2	not assigned.unknown	(original description: Predicted protein (Fragment) OS=Chlamydomonas reinhardtii GN=CHLREDRAFT_150094 PE=4 SV=1)	0	1.13702	1.33709	1.21455	1.26832	1.36167	1.46699	1.49352	1.01748	0.537262	0.185572	0.0244829	0.211951	0.0259452	0.0231117	0.0630382	1.24258	1.35942	0.969849	0.922746	1.31091	1.34052	1.24573	1.34093	1.33329	1.29631	1.38702	1.40121	1.26356	1.3562	1.52687	1.24508	1.34178	1.47289	0.227538	0.28605	0.55659		S	2	___1	1	4.82415e-07	173.19	150.01	144.41
A8IZS7	35.2	not assigned.unknown	(original description: Predicted protein OS=Chlamydomonas reinhardtii GN=CHLREDRAFT_191001 PE=4 SV=1)	Cre09.g392500.t1.2	1.03192	1.10064	1.13689	1.11316	1.10797	1.16479	1.69563	2.52826	0.847371	0.0573635	0.031686	0.0178064	0.00411626	0.0146241	0.0289301	0.969311	1.07638	1.11635	1.04451	1.08905	1.14778	1.08195	1.13649	1.14656	1.11365	1.09151	1.13189	1.11701	1.11945	1.17623	1.10882	1.11296	1.18626	0.26836	0.286337	0.678771		S	2	___1	1	1.78833e-52	217.39	190.42	209.53
A8JA64	35.2	not assigned.unknown	(original description: Predicted protein OS=Chlamydomonas reinhardtii GN=CHLREDRAFT_193345 PE=4 SV=1)	0	0.9502	0.986463	1.03273	1.0124	1.03451	1.04594	0.431456	0.238255	0.0466597	0.131772	0.113965	0.0463721	0.137532	0.0266378	0.0253886	1.09475	0.855163	1.03356	0.919057	1.05973	0.985952	0.836789	1.0445	1.07869	1.08904	1.01534	1.07184	1.09454	1.02326	1.02109	0.853625	1.06492	1.0449	0.441256	0.286577	0.991441		S	3	___2	1	1.13444e-11	74.146	48.328	66.419
A6Q0K5	35.2	not assigned.unknown	(original description: Calvin cycle protein CP12, chloroplastic OS=Chlamydomonas reinhardtii GN=CP12 PE=1 SV=2)	0	1.05888	1.16021	1.0522	1.11689	1.21586	1.2097	1.1418	0.616451	0.222972	0.152541	0.0300871	0.150743	0.0497235	0.0629513	0.0583705	0.88478	1.19074	0.879474	1.16908	1.13059	1.11992	1.12277	1.15929	1.1572	1.06053	1.27616	1.17455	1.15455	1.15055	1.27708	1.13558	1.22087	1.17747	0.198	0.28671	0.312429		S	3	___1	0.868488	1.10325e-06	112.34	94.834	112.34
A8IGD9	35.2	not assigned.unknown	(original description: Low-CO2-inducible protein OS=Chlamydomonas reinhardtii GN=LCI5 PE=4 SV=1)	0	1.1311	1.05843	1.07874	1.09308	1.03893	0.966738	0.339887	0.216823	0.0633074	0.191227	0.0213211	0.014497	0.222654	0.157582	0.185619	1.22841	1.05995	1.0724	1.25409	1.03639	1.09533	0.910785	1.07896	1.06849	1.24639	1.1184	0.867954	1.19515	0.857433	0.8514	0.837685	1.14094	1.18086	0.747393	0.287048	0.794525		T	3	___1	0.976548	0.0075693	94.781	57.827	63.297
A8I557	35.2	not assigned.unknown	(original description: Predicted protein OS=Chlamydomonas reinhardtii GN=CHLREDRAFT_187360 PE=4 SV=1)	0	0.872324	0.994016	1.01996	0.927083	0.864799	0.877696	1.09983	0.238162	1.01186	0.0582435	0.0160719	0.0277051	0.106258	0.0623598	0.137032	0.916175	0.98452	1.02669	0.894559	0.984955	1.04368	0.806239	1.01257	0.989512	0.968625	0.933348	1.02512	1.0063	0.849619	0.75421	0.80633	0.811431	0.853756	0.998256	0.288464	0.169031		S	3	___1	0.998457	0.00034356	71.002	53.474	61.612
A8I186	35.2	not assigned.unknown	(original description: Predicted protein (Fragment) OS=Chlamydomonas reinhardtii GN=CHLREDRAFT_143167 PE=4 SV=1)	0	1.19142	1.20227	1.20219	1.02971	1.05159	1.28298	0.737536	0.849905	0.780156	0.0732503	0.0288281	0.0203193	0.191036	0.188451	0.0442496	1.27068	1.22604	1.17991	1.17736	1.1702	1.2197	1.12621	1.21056	1.20698	1.13576	1.18717	1.23269	0.809177	0.836396	1.31597	1.1442	1.1312	1.30026	0.352211	0.288994	0.86983		S	2	___1	0.978655	7.81519e-39	195.86	150.29	118.23
A8J007	35.2	not assigned.unknown	(original description: Predicted protein (Fragment) OS=Chlamydomonas reinhardtii GN=CHLREDRAFT_148354 PE=4 SV=1)	0	1.44317	1.26366	1.17888	1.25885	1.20453	0.870039	6.51649	7.73965	3.36161	0.0369417	0.0429084	0.0427645	0.0184528	0.0534046	0.025557	1.48012	1.30152	1.1971	1.40624	1.21705	1.20952	1.44313	1.27242	1.13002	1.24428	1.26614	0.855267	1.2796	1.17589	0.89955	1.25268	1.17155	0.8553	0.262885	0.289055	0.280366		S	2	___3	1	0.000232308	99.238	54.626	43.05
A8J855	35.2	not assigned.unknown	(original description: Predicted protein OS=Chlamydomonas reinhardtii GN=CHLREDRAFT_176365 PE=4 SV=1)	0	0.974137	1.06652	1.18556	1.10659	1.09315	1.28215	0.638086	1.07617	0.0907128	0.213894	0.170993	0.0116714	0.0193683	0.21073	0.0524833	1.21877	1.17004	1.1984	0.881286	1.16037	1.1756	0.822359	0.869157	1.18269	1.09118	1.25285	1.23363	1.12833	1.17229	1.33785	1.10025	0.854303	1.27499	0.954911	0.289105	0.515867		S	2	___1	1	1.37523e-54	206.46	171.39	155.14
A8J007	35.2	not assigned.unknown	(original description: Predicted protein (Fragment) OS=Chlamydomonas reinhardtii GN=CHLREDRAFT_148354 PE=4 SV=1)	0	1.44317	1.26366	1.17888	1.25885	1.20453	0.864272	6.51039	7.72824	3.40411	0.0369417	0.0429084	0.0427645	0.0184528	0.0534046	0.029379	1.48012	1.30152	1.1971	1.40624	1.21705	1.20952	1.44313	1.27242	1.13002	1.24428	1.26614	0.857697	1.2796	1.17589	0.896381	1.25268	1.17155	0.838737	0.262717	0.289126	0.280237		T	2	___3	1	0.000232308	99.238	54.626	43.05
A8J007	35.2	not assigned.unknown	(original description: Predicted protein (Fragment) OS=Chlamydomonas reinhardtii GN=CHLREDRAFT_148354 PE=4 SV=1)	0	1.44317	1.26366	1.17888	1.25885	1.20453	0.857071	6.45731	7.66642	3.41926	0.0369417	0.0429084	0.0427645	0.0184528	0.0534046	0.0362256	1.48012	1.30152	1.1971	1.40624	1.21705	1.20952	1.44313	1.27242	1.13002	1.24428	1.26614	0.815826	1.2796	1.17589	0.871655	1.25268	1.17155	0.883731	0.265803	0.289893	0.28113		Y	2	___3	1	0.000232308	99.238	54.626	43.05
A8ILD8	20.2.1	stress.abiotic.heat	(chl4|512598 : 525.0) no description available & (at5g42480 : 106.0) Shows homology to the cyanobacterial cell division protein Ftn2, mutant only has two mesophyll cell chloroplasts. Protein was localized to a ring at the center of the chloroplasts. Probably involved in functions in the assembly and/or stabilization of the plastid-dividing FtsZ ring, inhibiting FtsZ filament formation in the chlo…	0	1.13295	1.04768	1.06615	1.12384	1.1344	1.26384	0.990296	0.278829	0.52059	0.0718733	0.145631	0.20984	0.0215773	0.0226881	0.0355631	1.21364	0.884908	0.824248	1.10941	1.09247	1.17509	1.0758	1.16564	1.19912	1.12135	1.15281	1.22536	1.14655	1.14134	1.29549	1.10361	1.10906	1.27068	0.198368	0.290016	0.83953		S	3	___1	1	3.92126e-13	119.18	90.048	119.18
A8IF19	35.2	not assigned.unknown	(original description: Flagellar associated protein OS=Chlamydomonas reinhardtii GN=FAP69 PE=4 SV=1)	0	1.17381	1.04423	0.955204	0.977297	0.955326	1.15186	0.174524	0.186083	1.06152	0.076516	0.157643	0.174465	0.196408	0.150189	0.0294491	1.26081	0.863649	0.864381	1.14361	1.11469	0.844887	1.117	1.15436	1.15634	0.842095	0.879128	1.18556	1.20259	1.12834	1.1311	0.887209	0.85851	1.13891	0.88087	0.290034	0.114573		S	3	___1	0.825616	0.000244778	77.657	59.937	76.668
A8J007	35.2	not assigned.unknown	(original description: Predicted protein (Fragment) OS=Chlamydomonas reinhardtii GN=CHLREDRAFT_148354 PE=4 SV=1)	0	1.44317	1.26366	1.17888	1.25885	1.20453	0.879514	6.20732	7.42237	3.04032	0.0369417	0.0429084	0.0427645	0.0184528	0.0534046	0.0395479	1.48012	1.30152	1.1971	1.40624	1.21705	1.20952	1.44313	1.27242	1.13002	1.24428	1.26614	0.848331	1.2796	1.17589	0.866215	1.25268	1.17155	0.923998	0.263374	0.290106	0.283783		T	2	___3	1	0.000232308	99.238	54.626	43.05
A8IYH9	1.1.1.2	PS.lightreaction.photosystem II.PSII polypeptide subunits	(p11471|psbp_chlre : 354.0) Oxygen-evolving enhancer protein 2, chloroplast precursor (OEE2) - Chlamydomonas reinhardtii & (chl4|513916 : 354.0) no description available & (gnl|cdd|85679 : 247.0) no description available & (at1g06680 : 209.0) Encodes a 23 kD extrinsic protein that is part of photosystem II and participates in the regulation of oxygen evolution.; photosystem II subunit P-1 (PSBP-1…	0	1.0782	1.03921	1.05681	1.03617	1.08247	1.0853	0.0867626	0.0166529	0.162693	0.148669	0.012892	0.0168062	0.153917	0.0139404	0.0438945	0.916704	1.05061	1.07502	1.10853	1.04181	1.0535	1.20937	1.02522	1.04191	0.861323	1.0837	1.03578	1.15119	1.06795	1.10071	1.096	1.09575	1.11941	0.818248	0.290419	0.855072		S	3	___1	0.999969	6.10279e-45	215.48	163.54	89.502
A8J225	35.2	not assigned.unknown	(original description: Low-CO2-inducible protein (Fragment) OS=Chlamydomonas reinhardtii GN=LCI23 PE=4 SV=1)	Cre06.g281600.t2.1	1.24444	1.0816	1.31849	1.04268	1.05958	1.36245	0.500063	2.19152	0.630187	0.0252116	0.182128	0.0101254	0.145122	0.182418	0.0205968	1.26292	0.954031	1.30691	1.21572	1.29018	1.32569	1.25468	1.00059	1.32287	1.20886	0.957108	1.34027	0.978243	0.951435	1.38098	0.940937	1.27019	1.3661	0.972123	0.290426	0.99859		S	2	___1	0.999809	9.67227e-32	192.72	137.86	132.9
A8I2A2	35.2	not assigned.unknown	(original description: Predicted protein (Fragment) OS=Chlamydomonas reinhardtii GN=CHLREDRAFT_141982 PE=4 SV=1)	0	1.07552	0.992825	0.889084	1.04079	0.954064	0.937525	0.112691	2.37674	0.40999	0.0424479	0.00727368	0.064566	0.0284572	0.0929399	0.0765493	1.09459	0.99845	0.855469	1.02688	0.984611	0.963522	1.10509	0.995415	0.84826	1.01408	0.992909	0.993021	1.03757	0.848004	0.850195	1.07072	1.02128	0.969358	0.81789	0.290506	0.663212		S	3	___1	0.999991	3.27051e-05	73.109	43.776	73.109
A8IHY6	35.2	not assigned.unknown	(original description: Predicted protein OS=Chlamydomonas reinhardtii GN=CHLREDRAFT_188322 PE=4 SV=1)	0	1.03923	1.05519	1.06168	0.963014	1.04354	1.13996	0.0364696	1.1864	0.780351	0.0358574	0.0303781	0.0225559	0.134723	0.0392267	0.0588179	1.07174	1.04657	1.03589	1.04517	1.03006	1.07772	1.00077	1.08895	1.07143	1.01107	1.07319	1.0745	1.06712	1.05836	1.18837	0.810852	0.999058	1.15701	0.951474	0.292159	0.565969		S	2	___1	0.993838	0.000423267	106.6	35.795	72.968
Q6UKY5	35.2	not assigned.unknown	(original description: Acyl carrier protein OS=Chlamydomonas reinhardtii GN=ACP2 PE=2 SV=1)	Cre13.g577100.t1.2	0.90625	0.865659	0.904449	0.829619	0.891293	0.882558	0.700633	0.283073	0.977174	0.0257887	0.0127907	0.0521936	0.0504252	0.0145776	0.0482254	0.935028	0.877779	0.932204	0.898491	0.866909	0.844242	0.885232	0.852289	0.936901	0.795839	0.897548	0.848317	0.88758	0.874632	0.93771	0.805436	0.901699	0.861648	0.123144	0.292518	0.397754		T	3	___1	0.974689	7.80569e-05	97.776	73.765	49.773
A8JG87	35.2	not assigned.unknown	no hits & (original description: Predicted protein OS=Chlamydomonas reinhardtii GN=CHLREDRAFT_179926 PE=4 SV=1)	0	0.872287	0.886046	0.90074	0.851891	0.948202	1.02012	1.6183	2.10821	1.27803	0.0321948	0.0338789	0.047232	0.0383444	0.0568192	0.0508506	0.878975	0.859747	0.880196	0.900612	0.874115	0.867259	0.837273	0.924276	0.954765	0.845703	1.00745	0.963444	0.892953	0.894166	1.06175	0.817017	0.942994	1.03517	0.247741	0.292798	0.734779		S	2	___1	0.993208	0.0134778	104.06	47.009	95.815
A8HQ41	35.2	not assigned.unknown	(original description: Predicted protein (Fragment) OS=Chlamydomonas reinhardtii GN=CHLREDRAFT_189825 PE=4 SV=1)	0	0.950852	0.999765	0.964866	0.923753	1.00121	0.92013	0.196299	0.287956	0.033379	0.104761	0.100309	0.108318	0.108071	0.107683	0.0844459	0.943986	1.06529	0.842203	1.05888	1.04972	1.00503	0.849692	0.884288	1.04737	1.0467	1.02032	1.0174	0.843792	1.09806	0.877468	0.880764	0.885249	0.865527	0.299219	0.294829	0.460611		S	3	___1	0.960254	1.03727e-05	64.383	36.341	64.383
A8I0B9	35.2	not assigned.unknown	(original description: Predicted protein OS=Chlamydomonas reinhardtii GN=CHLREDRAFT_187678 PE=4 SV=1)	0	1.08634	0.958845	0.87034	0.972981	0.96479	0.859859	0.553714	2.12794	0.459844	0.0753038	0.0728475	0.0886281	0.106086	0.011297	0.0477593	1.13508	0.876419	0.948259	1.12433	0.985524	0.888839	0.999606	1.01459	0.773923	1.04486	0.952933	0.805085	0.851138	0.975429	0.892793	1.02295	0.966008	0.8817	0.641582	0.295797	0.77016		S	3	___1	0.957349	3.12507e-07	60.101	43.96	42.181
A8IMV0	35.2	not assigned.unknown	(original description: Predicted protein OS=Chlamydomonas reinhardtii GN=CHLREDRAFT_183139 PE=3 SV=1)	Cre06.g307200.t1.2	1.0637	1.15419	1.17304	1.15394	1.06889	0.904148	0.925566	0.338345	1.3106	0.179354	0.0523231	0.0380047	0.0283684	0.182605	0.0592515	1.13297	1.10434	1.18719	1.19809	1.14955	1.20193	0.860041	1.20868	1.12998	1.12677	0.858216	0.843647	1.15169	1.1817	0.962066	1.18337	1.16677	0.90673	0.105247	0.297571	0.895392		S	2	___1	1	3.95468e-05	126.09	63.784	92.151
A8JIB5	35.2	not assigned.unknown	(original description: Predicted protein OS=Chlamydomonas reinhardtii GN=CHLREDRAFT_195172 PE=4 SV=1)	Cre04.g231418.t1.1	0.874962	0.856423	0.907934	0.862222	0.914114	0.830145	0.341059	0.246885	2.12858	0.0207509	0.0103235	0.041163	0.0020453	0.0503677	0.0260432	0.878042	0.845484	0.940786	0.894001	0.85779	0.921255	0.852843	0.865994	0.86176	0.862392	0.971514	0.860122	0.860096	0.89353	0.81309	0.864176	0.877299	0.817222	0.840681	0.298691	0.715351		S	2	___1	0.808558	0.00684914	98	54.539	98
A8ISL9	35.2	not assigned.unknown	(original description: Predicted protein OS=Chlamydomonas reinhardtii GN=CHLREDRAFT_189375 PE=4 SV=1)	Cre16.g668350.t1.2	0.924223	1.05062	0.843299	1.04279	0.957108	1.19628	1.94222	0.105169	2.44208	0.0882898	0.145406	0.0119885	0.0243535	0.115854	0.0713339	0.911967	1.14807	0.832168	1.018	0.883485	0.855992	0.842701	1.1203	0.841738	1.06215	1.09033	1.1395	1.01545	0.901055	1.27635	1.05078	0.879942	1.17299	0.243471	0.299367	0.472434		S	2	___1	0.988351	1.22017e-06	132.86	89.092	108.72
A8J354	35.2	not assigned.unknown	no hits & (original description: Predicted protein OS=Chlamydomonas reinhardtii GN=CHLREDRAFT_192024 PE=4 SV=1)	0	1.18211	1.26537	1.1486	1.22051	1.24089	1.32308	1.06981	0.337002	1.07887	0.0789078	0.0371593	0.147231	0.0233019	0.0128342	0.0160123	1.24796	1.2653	1.17925	1.09465	1.22824	1.27809	1.20373	1.30256	0.988456	1.20433	1.25346	1.30524	1.24722	1.24141	1.33621	1.20998	1.2278	1.32779	0.581339	0.300276	0.416481		S	2	___1	1	0	364.64	318.49	161.31
A8IGD9	35.2	not assigned.unknown	(original description: Low-CO2-inducible protein OS=Chlamydomonas reinhardtii GN=LCI5 PE=4 SV=1)	0	1.06378	1.08187	1.28595	1.14718	1.31152	1.43786	2.62334	3.10861	0.435669	0.0543366	0.175489	0.0350989	0.0087567	0.0279148	0.091082	1.08116	0.881133	1.24683	1.00288	1.20621	1.29637	1.1073	1.15827	1.31466	1.13718	1.33295	1.36329	1.15092	1.32166	1.53937	1.15346	1.27995	1.41091	0.177372	0.300277	0.415613		S	3	___2	0.926435	1.26336e-141	259.27	190.23	82.859
A8HW56	31.2	cell.division	(chl4|523252 : 1486.0) no description available & (loc_os10g30580.1 : 1340.0) no description available & (at5g03340 : 1323.0) ATPase, AAA-type, CDC48 protein; FUNCTIONS IN: protein binding, ATPase activity; LOCATED IN: cell wall; EXPRESSED IN: 24 plant structures; EXPRESSED DURING: 13 growth stages; CONTAINS InterPro DOMAIN/s: ATPase, AAA+ type, core (InterPro:IPR003593), ATPase, AAA-type, core (…	Cre06.g269950.t1.2	0.90936	0.859859	0.926902	0.785102	0.877239	0.926007	0.715119	1.1441	1.0334	0.0277071	0.0397402	0.0194609	0.0760566	0.0723648	0.0674195	0.929333	0.867555	0.917261	0.921019	0.895189	0.949301	0.877729	0.816834	0.914143	0.849842	0.955183	0.984241	0.70134	0.864348	0.941632	0.804124	0.812186	0.852146	0.607519	0.301026	0.218227		S	2	___1	0.99191	6.56617e-06	133.98	111.06	133.98
A8J227	35.2	not assigned.unknown	(original description: Predicted protein OS=Chlamydomonas reinhardtii GN=CHLREDRAFT_191656 PE=4 SV=1)	0	0.944793	0.95451	1.00367	0.91002	0.968527	1.02079	0.0144311	1.02908	0.142746	0.0669236	0.0899447	0.0107411	0.0951274	0.0238258	0.0163935	1.01157	1.03189	1.01294	0.945091	0.975809	1.00616	0.87772	0.855827	0.991898	0.929372	0.97955	1.0033	0.993984	0.984845	1.02327	0.806705	0.941186	1.03581	0.102268	0.301401	0.817311		S	2	___1	1	4.88056e-06	119.31	85.365	107.57
A8J6Q5	35.2	not assigned.unknown	(original description: Predicted protein OS=Chlamydomonas reinhardtii GN=CHLREDRAFT_192516 PE=4 SV=1)	Cre17.g726650.t1.2	0.992405	1.15929	1.20074	1.16968	1.13687	1.23708	1.09082	1.73063	1.09509	0.163162	0.0139549	0.0253667	0.0203281	0.0406242	0.0268829	0.870217	1.17415	1.17787	0.929303	1.14647	1.22802	1.17769	1.15726	1.19633	1.16504	1.1167	1.20616	1.19193	1.18363	1.25494	1.15208	1.11028	1.25014	0.447156	0.30181	0.891185		S	2	___1	1	2.22015e-136	257.8	132.47	257.8
Q9ATK5	35.2	not assigned.unknown	(original description: Flagellar central pair-associated protein OS=Chlamydomonas reinhardtii GN=PF6 PE=4 SV=1)	Cre10.g434400.t1.2	0.993024	0.947276	0.970237	0.916595	0.96323	1.01322	0.0444528	0.11656	0.248067	0.113147	0.116417	0.026192	0.157974	0.0826304	0.00762507	1.08233	1.02678	0.982973	1.03096	1.00139	0.940112	0.865783	0.813651	0.987625	0.810862	1.02378	1.0115	1.09819	0.996817	1.02156	0.840733	0.869095	1.0066	0.334441	0.302083	0.831948		S	3	___1	1	0.000281125	76.152	52.426	76.152
A8JEZ5	35.2	not assigned.unknown	(original description: Predicted protein (Fragment) OS=Chlamydomonas reinhardtii GN=CHLREDRAFT_153823 PE=4 SV=1)	0	1.2021	1.0487	0.928113	0.932733	0.926238	0.907971	2.02337	1.2668	0.94947	0.0322508	0.128259	0.0783225	0.0251185	0.145114	0.0907532	1.2274	1.12339	0.929353	1.16579	0.900597	1.00581	1.21311	1.1221	0.849178	0.952378	1.08912	0.809768	0.941391	0.81072	0.988747	0.904431	0.878879	0.925397	0.295458	0.303794	0.223488		S	2	___1	0.998811	0.0130791	84.615	25.8	84.615
A8JGI9	29.2.1.2.1.7	protein.synthesis.ribosomal protein.eukaryotic.40S subunit.S7	(chl4|512819 : 351.0) no description available & (gnl|cdd|38530 : 259.0) no description available & (loc_os03g18580.1 : 248.0) no description available & (q9xet4|rs7_secce : 242.0) 40S ribosomal protein S7 - Secale cereale (Rye) & (gnl|cdd|85337 : 235.0) no description available & (at1g48830 : 234.0) Ribosomal protein S7e family protein; FUNCTIONS IN: structural constituent of ribosome; INVOLVED …	Cre12.g498900.t1.2	0.925984	0.857025	0.887412	0.927576	0.894405	0.922141	1.17807	1.78655	0.362506	0.0133533	0.0316626	0.0225512	0.0388445	0.00739696	0.027264	0.916099	0.822896	0.866418	0.920679	0.862734	0.91125	0.941175	0.885445	0.884567	0.883734	0.891834	0.947636	0.941292	0.902745	0.925388	0.957702	0.888637	0.893399	0.307379	0.303995	0.760003		S	2	___1	0.941981	5.13795e-05	157.68	125.24	104.17
A8J7T7	29.5.3	protein.degradation.cysteine protease	(chl4|526247 : 860.0) no description available & (at1g47128 : 396.0) cysteine proteinase precursor-like protein/ dehydration stress-responsive gene (RD21); responsive to dehydration 21 (RD21); FUNCTIONS IN: cysteine-type endopeptidase activity, cysteine-type peptidase activity; INVOLVED IN: response to water deprivation; LOCATED IN: apoplast, chloroplast, vacuole; EXPRESSED IN: 23 plant structure…	0	0.943691	0.98404	1.08242	0.914294	0.987169	1.06919	0.111123	1.23304	0.0189486	0.131013	0.108267	0.017194	0.113951	0.107536	0.0251167	0.88472	0.86083	1.09348	1.09383	1.02731	1.09117	0.852527	1.06398	1.06261	0.865423	1.05669	1.09582	0.832929	1.04151	1.06585	1.04453	0.863306	1.04592	0.592256	0.304516	0.931802		S	3	___1	0.992931	0.000183544	94.922	68.561	94.922
A8HUN2	27.1.1	RNA.processing.splicing	(chl4|514680 : 162.0) no description available & (at5g18810 : 94.7) encodes an SC35-like splicing factor of 28 kD localized to the nuclear specks.; SC35-like splicing factor 28 (SCL28); FUNCTIONS IN: RNA binding, nucleotide binding, nucleic acid binding; INVOLVED IN: nuclear mRNA splicing, via spliceosome; LOCATED IN: nuclear speck, nucleus; EXPRESSED IN: cultured cell; CONTAINS InterPro DOMAIN/s…	Cre13.g586916.t1.1	0.895139	0.942708	0.988104	0.844455	0.904664	0.890422	1.26886	0.780775	0.163889	0.0370914	0.0692165	0.0215167	0.0133926	0.113229	0.0564736	0.895944	0.863085	0.965047	0.931821	0.97652	1.00765	0.857651	0.98852	0.991616	0.856893	0.7883	0.950572	0.846195	1.01447	0.838535	0.830278	0.91122	0.882159	0.486185	0.30505	0.227327		S	2	___2	1	0.000163971	147.75	87.352	147.75
A8IGD9	35.2	not assigned.unknown	(original description: Low-CO2-inducible protein OS=Chlamydomonas reinhardtii GN=LCI5 PE=4 SV=1)	0	0.869468	0.966963	0.994248	0.967855	0.90431	0.967414	0.0326489	0.528037	0.855873	0.0139875	0.0203327	0.0140819	0.0208367	0.0829786	0.139479	0.878122	0.945611	0.981985	0.853331	0.969182	1.00963	0.876952	0.986095	0.991131	0.962893	0.99989	1.00938	0.949947	0.850703	0.81177	0.990725	0.862338	1.08109	0.173734	0.305189	0.735486		S	2	___1	0.960465	0.0015352	119.51	72.521	81.651
A8J2P4	35.2	not assigned.unknown	(chl4|520437 : 369.0) no description available & (gnl|cdd|38323 : 175.0) no description available & (gnl|cdd|68221 : 165.0) no description available & (at5g58020 : 123.0) unknown protein; CONTAINS InterPro DOMAIN/s: Protein of unknown function DUF602 (InterPro:IPR006735); Has 385 Blast hits to 385 proteins in 189 species: Archae - 0; Bacteria - 0; Metazoa - 153; Fungi - 117; Plants - 50; Viruses …	0	1.23434	1.13289	1.14354	1.18854	1.13978	1.21628	0.346262	2.40127	1.7246	0.0646639	0.0236143	0.010801	0.0145807	0.0156806	0.0180371	1.30699	1.15866	1.13729	1.18308	1.11228	1.13731	1.21296	1.12774	1.15601	1.17677	1.15751	1.19654	1.20485	1.12773	1.23191	1.18399	1.1341	1.22038	0.682145	0.305958	0.714248		S	2	___1	1	1.1015e-12	159.4	125.4	92.492
A8J3F8	27.4	RNA.RNA binding	(chl4|516496 : 554.0) no description available & (at5g04430 : 152.0) Gene model AT5G04430.1 produces active protein. (BTS1S). Binds to ToMV genomic RNA and prevents viral multiplication.; binding to TOMV RNA 1L (long form) (BTR1L); CONTAINS InterPro DOMAIN/s: K Homology, type 1, subgroup (InterPro:IPR018111), K Homology (InterPro:IPR004087), K Homology, type 1 (InterPro:IPR004088); BEST Arabidops…	Cre16.g672750.t1.2	0.967449	0.897756	0.914365	0.897043	0.927104	0.871975	0.459065	0.259769	0.435073	0.0818878	0.044861	0.0722373	0.0759061	0.0245026	0.0393965	1.05496	0.904177	0.943027	0.954704	0.85003	0.967873	0.892681	0.93906	0.832195	0.872952	0.951697	0.855438	0.836106	0.926922	0.843542	0.982071	0.902693	0.916944	0.24253	0.306926	0.308793		S	2	___1	0.999424	0.00150757	80.596	51.46	80.596
A8J864	35.2	not assigned.unknown	(original description: Predicted protein (Fragment) OS=Chlamydomonas reinhardtii GN=CHLREDRAFT_150908 PE=4 SV=1)	0	0.873829	1.04138	0.844669	0.839532	0.896585	0.84853	3.02213	4.94851	2.7143	0.00195331	0.0216346	0.00808596	0.00434206	0.0191475	0.0628715	0.871956	1.06188	0.852734	0.873675	1.04349	0.836562	0.875854	1.01877	0.84471	0.83758	0.888708	0.902037	0.844507	0.882632	0.779284	0.836508	0.918414	0.864267	0.490567	0.307113	0.532791		S	2	___1	0.885447	2.25137e-15	146.1	117.82	120.71
A8IRK4	1.3.9	PS.calvin cycle.seduheptulose bisphosphatase	(chl4|521183 : 734.0) no description available & (p46284|s17p_chlre : 719.0) Sedoheptulose-1,7-bisphosphatase, chloroplast precursor (EC 3.1.3.37) (Sedoheptulose-bisphosphatase) (SBPase) (SED(1,7)P2ase) - Chlamydomonas reinhardtii & (loc_os04g16680.1 : 479.0) no description available & (at3g55800 : 474.0) Encodes the chloroplast enzyme sedoheptulose-1,7-bisphosphatase (SBPase), involved in the ca…	0	1.30673	1.18726	1.19331	1.22289	1.22254	1.11342	0.423184	0.717153	0.287312	0.0150554	0.0203006	0.0540066	0.030262	0.081273	0.218727	1.31726	1.21054	1.21214	1.31344	1.17322	1.13241	1.28949	1.17803	1.23539	1.21831	1.30989	1.22407	1.19518	1.14915	0.861471	1.25518	1.20859	1.2547	0.933222	0.307636	0.891505		S	2	___1	0.999984	1.61274e-21	123.29	87.365	114.15
A8J3V2	35.2	not assigned.unknown	(original description: Predicted protein OS=Chlamydomonas reinhardtii GN=CHLREDRAFT_174609 PE=4 SV=1)	0	1.00979	1.02822	1.06572	1.02189	1.09675	1.15384	2.68956	3.17224	0.913248	0.0101621	0.042111	0.00840317	0.0180785	0.0178133	0.0545398	1.02009	0.980805	1.07542	0.999768	1.04261	1.06113	1.0095	1.06126	1.06062	1.03358	1.09869	1.09481	1.00107	1.11352	1.20237	1.03102	1.07805	1.16433	0.220122	0.308335	0.329101		S	2	___1	0.999038	1.38397e-42	190.18	157.25	158.89
A8IBM7	35.2	not assigned.unknown	(original description: Predicted protein OS=Chlamydomonas reinhardtii GN=CHLREDRAFT_93305 PE=4 SV=1)	0	1.00976	0.830329	1.04951	1.05306	0.896278	1.0223	0.287133	2.15505	0.196782	0.117602	0.00967691	0.0184954	0.00891014	0.144461	0.0996085	0.999956	0.835097	1.05801	0.897362	0.819194	1.02829	1.13195	0.836697	1.06222	1.06051	0.772418	1.06955	1.05547	1.05497	0.907857	1.04319	0.861446	1.08948	0.980094	0.309172	0.918931		T	3	___3	0.898624	0.00950446	42.712	22.472	42.712
A8HX70	4.2.4	glycolysis.plastid branch.phosphofructokinase (PFK)	(chl4|523099 : 1023.0) no description available & (gnl|cdd|82016 : 426.0) no description available & (loc_os09g24910.2 : 411.0) no description available & (at2g22480 : 405.0) phosphofructokinase 5 (PFK5); CONTAINS InterPro DOMAIN/s: Pyrophosphate-dependent phosphofructokinase TP0108 (InterPro:IPR012004), Phosphofructokinase (InterPro:IPR000023); BEST Arabidopsis thaliana protein match is: phospho…	Cre06.g262900.t1.2	1.17065	1.18968	1.19214	1.21848	1.20654	1.23966	0.334807	0.0309617	0.0187931	0.242301	0.0284233	0.0222254	0.0129485	0.0524355	0.0516322	1.36539	1.21932	1.17892	0.899309	1.16265	1.1797	1.24726	1.18708	1.2178	1.2224	1.26463	1.29587	1.20403	1.16271	1.19435	1.22902	1.19228	1.22877	0.920566	0.309736	0.975632		S	2	___1	1	5.44898e-32	197.05	167.28	146.28
A8JG48	35.2	not assigned.unknown	(original description: Predicted protein OS=Chlamydomonas reinhardtii GN=CHLREDRAFT_179812 PE=4 SV=1)	Cre05.g234350.t1.1	1.10372	0.928698	0.959596	0.996317	0.952143	0.911596	0.613364	1.41836	0.443137	0.0646243	0.0609374	0.0131842	0.155686	0.0296153	0.0394513	1.14995	0.950294	0.944454	1.02988	0.859903	0.965803	1.13135	0.975896	0.968532	1.04937	0.939684	0.881167	0.821039	0.930793	0.897452	1.11854	0.985953	0.95617	0.525042	0.310405	0.94819		S	2	___1	0.999913	5.21321e-40	192.11	165.74	192.11
A8IU73	1.1.40	PS.lightreaction.cyclic electron flow-chlororespiration	(chl4|524994 : 848.0) no description available & (at4g22260 : 235.0) Similar to mitochondrial alternative oxidase. im mutants have a variegated phenotype and fail to differentiate chloroplasts in the majority of their cells under high light intensity continuous illumination. The white tissues of immutans accumulate phytoene, a non-colored C40 carotenoid intermediate. This suggests that immutans c…	0	1.14309	0.898465	0.869034	1.11245	0.995098	0.984028	0.682961	2.20492	0.410184	0.0229058	0.10123	0.131811	0.0441152	0.113478	0.111298	1.16838	0.853425	1.02073	1.13718	0.827572	0.803877	1.12372	1.0144	0.78249	1.11693	0.866594	0.855913	1.06626	1.03716	1.03931	1.15415	1.08154	1.05686	0.616035	0.311654	0.302125		S	2	___1	1	7.55091e-07	155.08	118.55	155.08
A8IA11	35.2	not assigned.unknown	(original description: Predicted protein OS=Chlamydomonas reinhardtii GN=CHLREDRAFT_166135 PE=4 SV=1)	Cre02.g075550.t1.2	0.930582	0.96846	0.934843	0.975855	0.97792	1.03553	1.56081	0.331928	0.633323	0.0591865	0.0248473	0.0158789	0.0747342	0.0240009	0.0313637	0.98717	0.984556	0.92312	0.869101	0.939843	0.928495	0.935473	0.98098	0.952914	0.995876	1.00518	0.999315	0.89315	0.968619	1.05398	1.03854	0.959961	1.05329	0.170884	0.311692	0.128909		S	2	___1	0.999985	0.00780174	52.045	34.468	52.045
A8IT61	35.2	not assigned.unknown	(original description: Predicted protein OS=Chlamydomonas reinhardtii GN=CHLREDRAFT_189453 PE=4 SV=1)	0	1.17834	1.19801	1.22395	1.14777	1.22341	1.16968	0.157782	0.138826	0.0974557	0.0446663	0.0168411	0.0145706	0.00748765	0.0242179	0.250466	1.22085	1.21419	1.2362	1.13179	1.18058	1.20784	1.18238	1.19927	1.22781	1.14609	1.20398	1.23906	1.14127	1.25054	1.37815	1.15596	1.21571	0.891841	0.381802	0.31178	0.314679		S	2	___1	1	1.95633e-16	190.18	149.46	124.2
A8IYP4	1.3.12	PS.calvin cycle.PRK	(p19824|kppr_chlre : 771.0) Phosphoribulokinase, chloroplast precursor (EC 2.7.1.19) (Phosphopentokinase) (PRKase) (PRK) - Chlamydomonas reinhardtii & (chl4|514003 : 771.0) no description available & (loc_os02g47020.1 : 567.0) no description available & (at1g32060 : 551.0) phosphoribulokinase (PRK); FUNCTIONS IN: protein binding, phosphoribulokinase activity, ATP binding; INVOLVED IN: response to…	Cre12.g554800.t1.2	0.922975	0.930138	0.980991	0.843418	0.892319	0.97878	1.22392	2.38356	0.532037	0.0264631	0.0456911	0.0161055	0.0425039	0.0657748	0.0272856	0.951659	0.877952	0.973381	0.917755	0.949518	0.999491	0.899511	0.962945	0.9701	0.88776	0.924062	0.951084	0.803027	0.816693	1.00564	0.839468	0.936203	0.979622	0.716033	0.311806	0.613642		T	2	___1	1	0.0135612	86.67	52.582	86.67
A8HND6	35.2	not assigned.unknown	(original description: Uncharacterized protein OS=Chlamydomonas reinhardtii GN=CHLREDRAFT_195864 PE=4 SV=1)	0	1.10207	0.978597	0.851169	1.00108	0.945182	0.894572	0.377541	2.22551	0.519222	0.0579463	0.092937	0.0377694	0.118157	0.0811097	0.0392941	1.15822	1.01788	0.887911	1.04248	0.872469	0.81245	1.10551	1.04544	0.853148	1.09358	0.948686	0.851519	1.04169	1.02448	0.928502	0.867976	0.862377	0.903696	0.617805	0.313653	0.185344		S	3	___1	0.795925	1.63087e-05	111.24	81.663	102.29
A8IVV4	35.2	not assigned.unknown	(original description: Predicted protein OS=Chlamydomonas reinhardtii GN=CHLREDRAFT_190330 PE=4 SV=1)	0	1.15946	1.14777	1.15716	1.08465	1.11833	0.906917	3.53922	2.10394	2.25381	0.0635772	0.0394405	0.0322659	0.0388751	0.0503817	0.0644035	1.23259	1.15096	1.16173	1.11732	1.10684	1.1869	1.12846	1.18552	1.12285	1.0873	1.16607	0.875408	1.12214	1.12325	0.981008	1.04452	1.06567	0.864334	0.19975	0.313992	0.0827589		T	3	___1	1	8.24359e-06	149.36	105.36	52.453
A8HQY2	34.16	transport.ABC transporters and multidrug resistance systems	(chl4|511332 : 1130.0) no description available & (at3g54540 : 682.0) member of GCN subfamily; general control non-repressible 4 (GCN4); CONTAINS InterPro DOMAIN/s: ATPase, AAA+ type, core (InterPro:IPR003593), ABC transporter-like (InterPro:IPR003439), ABC transporter, conserved site (InterPro:IPR017871); BEST Arabidopsis thaliana protein match is: general control non-repressible 3 (TAIR:AT1G645…	0	0.929632	1.05556	1.09213	0.884677	1.06268	1.13273	0.00676276	2.00695	0.120975	0.0621303	0.146515	0.091875	0.11461	0.0530854	0.0946304	0.998254	1.18021	1.10828	0.913445	1.09231	0.993251	0.877198	0.894173	1.17486	0.814436	1.00172	1.24195	1.01693	1.09873	1.08116	0.822664	1.08759	1.0751	0.601414	0.314662	0.924617		S	3	___1	0.999947	1.35466e-06	84.674	58.174	58.812
A8J9E1	35.2	not assigned.unknown	(original description: Predicted protein OS=Chlamydomonas reinhardtii GN=CHLREDRAFT_206221 PE=4 SV=1)	0	0.896164	0.950841	0.900253	0.967284	0.930763	0.94583	1.04149	0.144699	0.877897	0.0164498	0.00703826	0.0631738	0.0242816	0.0176455	0.0554583	0.914053	0.943196	0.935518	0.881691	0.952275	0.827319	0.892747	0.957052	0.937921	0.940243	0.910779	0.941397	0.987223	0.937313	0.892722	0.974385	0.944197	1.00337	0.99345	0.315206	0.155389		S	2	___2	0.999837	1.56982e-05	156.17	71.658	109.1
A8JF45	35.2	not assigned.unknown	(original description: Predicted protein (Fragment) OS=Chlamydomonas reinhardtii GN=CHLREDRAFT_153710 PE=4 SV=1)	0	0.938358	0.988572	0.960964	0.820199	0.89995	0.983746	1.33289	1.32599	0.880507	0.0339103	0.0146173	0.0638718	0.0358812	0.0834841	0.0831479	0.929118	0.989283	0.985509	0.97593	0.973612	1.00892	0.910025	1.00282	0.88846	0.790703	0.994857	1.0122	0.809748	0.837864	1.04894	0.860145	0.867129	0.890108	0.656365	0.316568	0.165881		Y	2	___2	1	0.0251576	72.928	28.725	72.928
A8J7H0	27.4	RNA.RNA binding	(chl4|520602 : 1139.0) no description available & (gnl|cdd|35373 : 401.0) no description available & (at5g25060 : 396.0) RNA recognition motif (RRM)-containing protein; FUNCTIONS IN: RNA binding, nucleotide binding, nucleic acid binding; INVOLVED IN: RNA processing; EXPRESSED IN: 23 plant structures; EXPRESSED DURING: 13 growth stages; CONTAINS InterPro DOMAIN/s: RNA polymerase II, large subunit,…	0	0.928556	0.988191	0.947633	0.922311	0.894655	0.899466	0.850855	0.0564313	0.267604	0.051643	0.00997799	0.0676224	0.040892	0.0805868	0.104536	0.935999	0.98696	0.994527	0.976073	0.978886	0.978255	0.873595	0.998728	0.870116	0.896411	0.819558	0.996475	0.969452	0.979791	0.913167	0.901069	0.884615	0.788755	0.277463	0.318235	0.365517		S	2	___1	1	0.00136636	107.69	64.881	100.69
A8JHJ9	35.2	not assigned.unknown	(original description: Predicted protein OS=Chlamydomonas reinhardtii GN=CHLREDRAFT_180403 PE=4 SV=1)	0	1.01994	1.25443	1.25213	1.20551	1.23991	1.35477	1.00853	1.56774	0.511977	0.251571	0.0288002	0.00949174	0.00671185	0.0285313	0.0690343	1.30781	1.28675	1.24957	0.909725	1.23147	1.26264	0.842283	1.24509	1.24419	1.20112	1.27261	1.28046	1.21324	1.22008	1.41692	1.20218	1.22704	1.36693	0.38052	0.319731	0.341498		S	2	___1	0.999592	0.0012242	93.237	43.03	93.237
A8HY98	29.5.11.4.2	protein.degradation.ubiquitin.E3.RING	(chl4|522918 : 459.0) no description available & (at1g01350 : 238.0) Zinc finger (CCCH-type/C3HC4-type RING finger) family protein; FUNCTIONS IN: zinc ion binding, nucleic acid binding; CONTAINS InterPro DOMAIN/s: Zinc finger, CCCH-type (InterPro:IPR000571), Zinc finger, RING-type, conserved site (InterPro:IPR017907), Zinc finger, RING-type (InterPro:IPR001841); BEST Arabidopsis thaliana protein …	0	1.10409	1.20686	1.19919	1.14948	1.20449	1.31246	1.76526	3.37084	1.10433	0.0697578	0.0177216	0.024442	0.00797473	0.0127152	0.0599459	1.14864	1.22725	1.17103	1.0237	1.1952	1.21483	1.13993	1.19812	1.21172	1.14891	1.21581	1.24741	1.15772	1.20694	1.36548	1.1418	1.19073	1.32449	0.591151	0.320777	0.576469		S	3	___1	1	3.65471e-151	265.43	184.92	72.399
A8IIK4	27.3.99	RNA.regulation of transcription.unclassified	(chl4|510026 : 765.0) no description available & (loc_os07g11110.1 : 279.0) no description available & (at3g63140 : 275.0) Encodes a protein with ribonuclease activity that is involved in plastid rRNA maturation.; chloroplast stem-loop binding protein of 41 kDa (CSP41A); FUNCTIONS IN: mRNA binding, poly(U) RNA binding; INVOLVED IN: rRNA processing; LOCATED IN: in 6 components; EXPRESSED IN: 25 pl…	Cre10.g440050.t1.2	1.08012	1.14597	1.15433	1.0867	1.04982	1.23635	0.0237127	1.22843	0.733242	0.0453477	0.0220066	0.0256096	0.0209778	0.177085	0.0437855	1.13211	1.1641	1.12476	1.04872	1.12148	1.16937	1.05954	1.15232	1.16885	1.06355	0.849844	1.19244	1.0921	1.18677	1.28	1.10445	1.11286	1.2366	0.35548	0.321019	0.678128		S	2	___1	1	3.36849e-32	201.72	136.78	93.716
A8I6P0	35.2	not assigned.unknown	(original description: Predicted protein OS=Chlamydomonas reinhardtii GN=CHLREDRAFT_142741 PE=4 SV=1)	0	1.0089	1.06158	1.05349	1.00331	1.05127	1.13084	0.69778	2.69862	1.20944	0.0459622	0.0161588	0.0178718	0.0198741	0.0207518	0.0515217	1.05219	1.0632	1.03559	1.01385	1.04467	1.05356	0.960665	1.07687	1.07133	0.997687	1.02803	1.07409	1.02539	1.06795	1.17467	0.98685	1.05782	1.14375	0.510082	0.321689	0.676759		S	2	___1	1	2.25701e-08	144.73	106.35	61.127
A8I8A3	29.2.1.1.1.1.83	protein.synthesis.ribosomal protein.prokaryotic.chloroplast.30S subunit.PSRP3	(chl4|518629 : 426.0) no description available & (gnl|cdd|81027 : 118.0) no description available & (q9mun2|rrp3_mesvi : 115.0) Probable plastid-specific 30S ribosomal protein 3 (PSRP-3) - Mesostigma viride & (at5g15760 : 90.1) Ribosomal protein PSRP-3/Ycf65; FUNCTIONS IN: structural constituent of ribosome; INVOLVED IN: translation; LOCATED IN: ribosome, intracellular, chloroplast, plastid; EXPR…	Cre02.g083950.t1.1	0.894114	0.987678	1.06803	0.962195	1.09114	1.17276	1.9778	3.06052	0.0668277	0.0372922	0.110809	0.0247995	0.0879812	0.0247849	0.0484877	0.907005	0.859843	1.08555	0.923251	1.04688	1.07889	0.852087	1.05631	1.03965	0.860913	1.11892	1.11681	1.01971	1.0713	1.20258	1.00596	1.08321	1.19889	0.499658	0.32206	0.258866		S	2	___1	1	1.13745e-05	155.09	121.12	139.64
A8J225	35.2	not assigned.unknown	(original description: Low-CO2-inducible protein (Fragment) OS=Chlamydomonas reinhardtii GN=LCI23 PE=4 SV=1)	Cre06.g281600.t2.1	1.17105	1.15711	1.13755	1.10743	1.0939	1.10855	1.93544	0.14065	0.181026	0.0570903	0.0197709	0.0454746	0.014914	0.0226758	0.0421823	1.23655	1.1787	1.17853	1.13184	1.13988	1.08863	1.14476	1.15277	1.14549	1.10374	1.11733	1.10844	1.12384	1.09231	1.06643	1.09471	1.07206	1.15079	0.0110971	0.322649	0.150283		S	2	___1	1	9.87878e-69	216.75	216.75	109.5
A8IDG9	35.2	not assigned.unknown	(original description: Uncharacterized protein OS=Chlamydomonas reinhardtii GN=CHLREDRAFT_205593 PE=4 SV=1)	Cre03.g179941.t1.1	0.892671	1.02517	0.955963	0.96455	0.958673	0.909429	0.142456	0.473327	0.522251	0.0242412	0.0135909	0.099659	0.0654285	0.113633	0.0995947	0.877211	1.04081	0.845679	0.920609	1.01853	1.03956	0.880192	1.01618	0.982647	0.977016	1.02247	0.885959	0.893786	1.02607	0.823666	1.02285	0.827477	1.01866	0.605908	0.323921	0.967153		S	2	___1	1	6.34342e-05	107.45	59.495	78.098
A8JFW3	35.2	not assigned.unknown	(original description: Predicted protein (Fragment) OS=Chlamydomonas reinhardtii GN=CHLREDRAFT_153982 PE=4 SV=1)	0	0.903182	1.02198	0.932018	0.902753	0.960094	1.07314	0.401224	1.43954	1.34111	0.0165607	0.0141818	0.0834684	0.0376323	0.107118	0.061795	0.921566	1.03784	1.02457	0.898546	1.01756	0.862438	0.889433	1.01052	0.90905	0.872555	0.999857	1.00628	0.890791	1.04164	1.12816	0.944912	0.83878	1.08499	0.571254	0.324212	0.817138		T	2	___2	0.993306	0.00314214	105.9	70.245	91.592
A8IE32	29.3.3	protein.targeting.chloroplast	(chl4|520970 : 1514.0) no description available & (q43715|toc75_pea : 309.0) Protein TOC75, chloroplast precursor (75 kDa translocon at the outer-envelope-membrane of chloroplasts) (Import intermediate associated protein of 75 kDa) (75 kDa chloroplast outer envelope protein) - Pisum sativum (Garden pea) & (loc_os03g16440.1 : 302.0) no description available & (at3g46740 : 300.0) Component of the t…	Cre03.g175200.t1.2	1.15696	1.26926	1.26956	1.13371	1.26779	1.18822	0.279513	0.685333	0.0831215	0.0858559	0.0592983	0.0438133	0.0688955	0.0499535	0.242546	1.24891	1.33442	1.21905	1.14307	1.2549	1.29239	1.0789	1.21847	1.29724	1.16144	1.3239	1.34088	1.18441	1.22814	0.908546	1.05527	1.25134	1.31524	0.911081	0.324397	0.93266		S	2	___2	1	1.94747e-05	139.02	106.2	91.926
A8J0B1	35.2	not assigned.unknown	(original description: Low-CO2-inducible protein OS=Chlamydomonas reinhardtii GN=LCI9 PE=4 SV=1)	Cre09.g394473.t1.1	1.09022	0.977682	0.998519	1.08179	1.04152	0.969379	0.0809041	0.863874	0.208002	0.118548	0.0757803	0.120728	0.0491534	0.0236741	0.0752903	0.953368	0.891061	0.864057	1.15581	1.01026	1.09761	1.16147	1.03172	1.03389	1.05631	1.01429	1.02291	1.0506	1.05714	1.00194	1.13845	1.05315	0.883288	0.0119918	0.324558	0.588617		S	2	___1	0.999976	1.0278e-187	229.22	162.55	204.23
A8HX70	4.2.4	glycolysis.plastid branch.phosphofructokinase (PFK)	(chl4|523099 : 1023.0) no description available & (gnl|cdd|82016 : 426.0) no description available & (loc_os09g24910.2 : 411.0) no description available & (at2g22480 : 405.0) phosphofructokinase 5 (PFK5); CONTAINS InterPro DOMAIN/s: Pyrophosphate-dependent phosphofructokinase TP0108 (InterPro:IPR012004), Phosphofructokinase (InterPro:IPR000023); BEST Arabidopsis thaliana protein match is: phospho…	Cre06.g262900.t1.2	1.25316	1.15291	1.03518	1.2177	1.17962	1.1955	0.596939	0.979121	0.711738	0.116104	0.0418092	0.162156	0.0278933	0.070034	0.0243128	1.38709	1.19935	1.10896	1.18106	1.1411	0.849248	1.19133	1.11828	1.14732	1.24444	1.25334	1.21269	1.21987	1.11397	1.20612	1.18878	1.17157	1.16768	0.954553	0.325616	0.345909		S	2	___2	1	5.44898e-32	197.05	167.28	146.28
A8IE32	29.3.3	protein.targeting.chloroplast	(chl4|520970 : 1514.0) no description available & (q43715|toc75_pea : 309.0) Protein TOC75, chloroplast precursor (75 kDa translocon at the outer-envelope-membrane of chloroplasts) (Import intermediate associated protein of 75 kDa) (75 kDa chloroplast outer envelope protein) - Pisum sativum (Garden pea) & (loc_os03g16440.1 : 302.0) no description available & (at3g46740 : 300.0) Component of the t…	Cre03.g175200.t1.2	1.15696	1.26926	1.26956	1.13371	1.26779	1.17361	0.29811	0.587124	0.102205	0.0858559	0.0592983	0.0438133	0.0688955	0.0499535	0.267823	1.24891	1.33442	1.21905	1.14307	1.2549	1.29239	1.0789	1.21847	1.29724	1.16144	1.3239	1.34088	1.18441	1.22814	0.864709	1.05527	1.25134	1.31524	0.911081	0.325671	0.93266		T	2	___2	1	1.94747e-05	152.89	127.51	91.926
A8IA91	35.2	not assigned.unknown	(original description: Predicted protein OS=Chlamydomonas reinhardtii GN=CHLREDRAFT_141259 PE=4 SV=1)	0	1.01265	0.875022	0.989384	0.929216	0.983454	0.935976	0.0860878	0.164645	0.794086	0.115794	0.0896898	0.0369782	0.0996102	0.0888468	0.0648538	0.891149	0.975682	0.966941	1.02505	0.803597	1.03206	1.12174	0.845788	0.969147	0.980712	1.01164	1.01082	0.814399	0.883932	0.896491	0.992537	1.05479	0.900611	0.120553	0.325987	0.969242		T	2	___1	0.894538	1.73846e-44	214.89	161.65	81.713
A8ITH3	31.1.1.1.2	cell.organisation.cytoskeleton.actin.actin depolymerizing factors	(chl4|524749 : 461.0) no description available & (gnl|cdd|28897 : 131.0) no description available & (gnl|cdd|36946 : 128.0) no description available & (at1g01750 : 118.0) actin depolymerizing factor 11 (ADF11); FUNCTIONS IN: actin binding; INVOLVED IN: biological_process unknown; LOCATED IN: intracellular; EXPRESSED IN: 6 plant structures; EXPRESSED DURING: 4 anthesis, petal differentiation and e…	Cre07.g339050.t1.2	1.20128	1.12713	1.05679	0.951581	1.02124	1.02382	1.56796	0.0881129	0.59236	0.0607319	0.01923	0.05378	0.208714	0.141811	0.029232	1.26796	1.13833	1.07193	1.18676	1.10493	0.997057	1.14913	1.13814	1.10137	0.865586	1.07479	1.03	0.799604	1.12847	0.991993	1.18955	0.860449	1.04947	0.119695	0.326781	0.374123		S	2	___1	0.93944	4.87497e-39	195.09	165.48	195.09
A8J225	35.2	not assigned.unknown	(original description: Low-CO2-inducible protein (Fragment) OS=Chlamydomonas reinhardtii GN=LCI23 PE=4 SV=1)	Cre06.g281600.t2.1	0.960973	1.03038	0.9814	1.04827	1.01333	1.05024	1.07969	0.0725562	0.655661	0.0948436	0.0209748	0.0447522	0.0358008	0.00485723	0.0592751	1.07008	1.04598	0.934952	0.89821	1.03863	1.02424	0.914632	1.00654	0.985009	1.03751	1.01723	0.989135	1.01908	1.01488	1.1075	1.08821	1.00789	1.05408	0.959392	0.32683	0.0880772		S	2	___1	1	9.49036e-51	217.2	191.15	160.46
A8JIB8	35.2	not assigned.unknown	(original description: RNA binding protein OS=Chlamydomonas reinhardtii GN=CHLREDRAFT_22211 PE=4 SV=1)	Cre04.g231124.t1.1	0.992967	1.06681	1.1588	0.956258	1.04048	1.04331	0.819748	1.22633	0.218683	0.0424233	0.103513	0.0184906	0.0331596	0.125017	0.105604	0.945722	0.950388	1.15523	1.00538	1.10158	1.17882	1.0278	1.14846	1.14236	0.939383	0.899122	1.14443	0.93493	1.1365	0.933731	0.994461	1.08583	1.05178	0.835114	0.327934	0.260141		S	2	___1	1	1.6188e-09	159.44	112.55	154.46
A8HNR8	30.5	signalling.G-proteins	(chl4|515308 : 689.0) no description available & (loc_os05g32390.1 : 293.0) no description available & (at1g03160 : 291.0) A new plant-specific member of the dynamin superfamily; defines a new protein class within the dynamin superfamily of membrane remodeling GTPases that regulates organization of the thylakoid network in plants. Targeted to chloroplasts and associated with thylakoid and envelop…	0	1.06311	0.959076	1.12907	0.936854	1.13839	1.20485	0.431401	1.48728	1.27359	0.0842308	0.166177	0.0190434	0.130582	0.0708784	0.018177	1.16037	1.14896	1.13666	1.01515	0.888052	1.14315	1.01381	0.840214	1.1074	0.997475	1.21965	1.193	1.02611	1.10621	1.22578	0.78698	1.0893	1.19577	0.873352	0.329818	0.812197		S	2	___1	0.995029	6.27058e-99	246.63	198.06	191.01
A8IVW2	35.2	not assigned.unknown	(original description: Flagella associated protein OS=Chlamydomonas reinhardtii GN=FAP7 PE=4 SV=1)	Cre12.g531800.t1.1	0.972734	0.986871	0.96823	0.95102	1.00226	1.06101	1.51393	1.97988	2.24807	0.045122	0.0199421	0.0141023	0.0164532	0.00196192	0.0288084	1.02476	0.979608	0.963443	0.944212	0.971579	0.984102	0.949234	1.00943	0.957144	0.967874	1.0012	1.03484	0.950185	1.00106	1.09188	0.935	1.00453	1.0563	0.675009	0.329929	0.540348		T	2	___1	0.998412	0.000500226	118.77	44.233	117.25
A8I186	35.2	not assigned.unknown	(original description: Predicted protein (Fragment) OS=Chlamydomonas reinhardtii GN=CHLREDRAFT_143167 PE=4 SV=1)	0	0.986955	1.01026	1.04116	0.974419	0.957355	1.04239	0.572518	1.49642	0.317804	0.064223	0.0417907	0.0165478	0.0203474	0.0492511	0.0130128	0.912896	0.97122	1.02507	1.02066	1.00522	1.05813	1.02731	1.05434	1.0403	0.967909	0.900529	1.05661	0.997225	0.987708	1.03108	0.958124	0.983829	1.03948	0.928818	0.33077	0.137152		S	2	___1	1	3.92097e-13	151.85	115.73	139.69
A8J526	35.2	not assigned.unknown	(original description: Predicted protein (Fragment) OS=Chlamydomonas reinhardtii GN=CHLREDRAFT_150094 PE=4 SV=1)	0	1.01457	0.932091	1.07182	1.06777	1.08577	1.07461	0.773719	0.250693	0.351013	0.0915899	0.129024	0.060545	0.0375932	0.0326063	0.173786	0.914916	0.974613	1.00629	1.09507	0.787174	1.08349	1.03372	1.03449	1.12567	1.06131	1.04816	0.875169	1.03382	1.10607	1.19351	1.10817	1.10309	1.15516	0.675536	0.33085	0.173086		S	2	___2	0.999938	1.65093e-20	193.45	144.17	162.67
A8J2K0	35.2	not assigned.unknown	(original description: Predicted protein OS=Chlamydomonas reinhardtii GN=CHLREDRAFT_205703 PE=4 SV=1)	0	0.873693	0.936074	1.02316	0.975922	0.872802	1.17357	0.78558	2.27402	0.849178	0.0522555	0.137474	0.120616	0.0730792	0.0523894	0.0681563	0.819473	1.09465	1.09998	0.923733	0.863168	0.884145	0.877875	0.85041	1.08537	1.01907	0.873559	1.10269	1.01715	0.820038	1.23863	0.891545	0.924809	1.17938	0.958936	0.331497	0.632235		S	2	___1	0.989053	2.87814e-06	145.81	117.61	125.96
A8IX96	30.3	signalling.calcium	(chl4|521624 : 836.0) no description available & (gnl|cdd|29142 : 176.0) no description available & (gnl|cdd|35803 : 136.0) no description available & (at2g41860 : 103.0) member of Calcium Dependent Protein Kinase; calcium-dependent protein kinase 14 (CPK14); FUNCTIONS IN: in 6 functions; INVOLVED IN: protein amino acid phosphorylation; LOCATED IN: cytoplasm; EXPRESSED IN: 9 plant structures; EXP…	0	0.907996	0.970652	1.13225	0.84305	1.14006	0.965272	0.190024	2.03509	1.59808	0.0639342	0.120381	0.012887	0.0556819	0.0120399	0.175283	0.933363	0.885544	1.12004	0.955353	1.10839	1.14572	0.835271	0.918028	1.131	0.867032	1.15346	1.16137	0.779395	1.13015	0.910621	0.882721	1.13657	0.823825	0.538051	0.332228	0.921137		T	2	___1	0.990356	0.000158397	147.39	108.71	124.81
A8IFK0	34.1	transport.p- and v-ATPases	(chl4|520740 : 2108.0) no description available & (gnl|cdd|35426 : 536.0) no description available & (gnl|cdd|30822 : 453.0) no description available & (loc_os12g44150.1 : 432.0) no description available & (at3g47950 : 429.0) mutant has Slight reduction in root and shoot growth; Exaggerated defects in salt stress; Plasma Membrane H+ ATPase; H(+)-ATPase 4 (HA4); FUNCTIONS IN: ATPase activity, hydr…	Cre03.g164600.t1.2	1.11378	1.18741	1.20956	1.03196	1.21529	1.14357	0.387954	1.00797	0.223019	0.0429048	0.0110284	0.00858869	0.145163	0.007549	0.189351	1.15383	1.17719	1.20203	1.11901	1.18594	1.21892	1.0685	1.1991	1.20774	0.864922	1.21964	1.21723	1.10344	1.20657	0.928464	1.12753	1.21966	1.28503	0.551342	0.332315	0.460761		S	2	___2	1	0.00855746	92.952	60.698	92.952
A8JEM6	35.2	not assigned.unknown	(original description: Low-CO2-inducible protein OS=Chlamydomonas reinhardtii GN=LCI33 PE=4 SV=1)	0	1.02993	0.988011	1.04758	0.985237	1.07435	0.925458	0.393703	0.284506	1.29154	0.051317	0.104444	0.014418	0.0534012	0.00476186	0.0966237	1.07632	0.867411	1.05568	0.974805	1.04878	1.05613	1.03866	1.04784	1.03094	0.995054	1.07649	1.03703	0.927609	1.06889	0.869565	1.03305	1.07767	0.869779	0.63298	0.332379	0.511207		S	2	___1	0.998786	1.20937e-20	191.01	144.06	168.67
A8J526	35.2	not assigned.unknown	(original description: Predicted protein (Fragment) OS=Chlamydomonas reinhardtii GN=CHLREDRAFT_150094 PE=4 SV=1)	0	1.01151	0.953976	1.07182	1.06777	1.08577	1.14755	1.79737	1.06178	0.217026	0.0965989	0.0925714	0.060545	0.0375932	0.0326063	0.0502069	0.905738	0.974613	1.00629	1.09507	0.852828	1.08349	1.03372	1.03449	1.12567	1.06131	1.04816	1.09397	1.03382	1.10607	1.19351	1.10817	1.10309	1.15516	0.0318651	0.332552	0.173086		T	2	___2	1	1.37701e-19	171.15	144.61	115.04
A8IFI7	29.4	protein.postranslational modification	(chl4|520747 : 281.0) no description available & (at5g14720 : 104.0) Protein kinase superfamily protein; FUNCTIONS IN: protein serine/threonine kinase activity, protein kinase activity, kinase activity, ATP binding; INVOLVED IN: protein amino acid phosphorylation; LOCATED IN: plasma membrane; EXPRESSED IN: 24 plant structures; EXPRESSED DURING: 15 growth stages; CONTAINS InterPro DOMAIN/s: Protei…	0	1.00844	0.970112	0.947247	0.943971	0.90122	0.875377	0.70834	0.238375	0.000803971	0.124942	0.168175	0.0917302	0.105425	0.0592611	0.0194571	1.11412	0.778077	1.02222	0.870548	1.04114	0.844963	1.04067	1.09112	0.974558	0.942989	0.877108	0.894462	0.83904	0.857815	0.855568	1.04988	0.968736	0.876102	0.55002	0.332873	0.308339		S	3	___1	0.759802	0.000427625	51.811	41.841	51.811
A8J6C3	2.2.2.3	major CHO metabolism.degradation.starch.glucan water dikinase	(chl4|517507 : 907.0) no description available & (q2qtc2|pwd_orysa : 493.0) Phosphoglucan, water dikinase, chloroplast precursor (EC 2.7.9.5) - Oryza sativa (Rice) & (loc_os12g20150.1 : 493.0) no description available & (at5g26570 : 388.0) chloroplastidic phosphoglucan, water dikinase (PWD) which is required for normal degradation of leaf starch in Arabidopsis. NMR analysis of the mutants, sugges…	0	0.919395	0.881751	0.899729	0.85328	0.880984	0.896453	0.554127	0.0984309	0.428848	0.0380033	0.0475542	0.0516494	0.0215805	0.0100684	0.0674853	0.96325	0.842523	0.95311	0.896127	0.868089	0.89607	0.898809	0.934641	0.850006	0.833469	0.885595	0.966853	0.876276	0.887921	0.832319	0.850097	0.869436	0.890186	0.680017	0.333299	0.416057		S	2	___1	1	3.05745e-48	208.37	149.19	191.71
A8IFK0	34.1	transport.p- and v-ATPases	(chl4|520740 : 2108.0) no description available & (gnl|cdd|35426 : 536.0) no description available & (gnl|cdd|30822 : 453.0) no description available & (loc_os12g44150.1 : 432.0) no description available & (at3g47950 : 429.0) mutant has Slight reduction in root and shoot growth; Exaggerated defects in salt stress; Plasma Membrane H+ ATPase; H(+)-ATPase 4 (HA4); FUNCTIONS IN: ATPase activity, hydr…	Cre03.g164600.t1.2	1.11378	1.18741	1.20956	1.00904	1.21529	1.08666	0.475285	0.586808	0.214367	0.0429048	0.0110284	0.00858869	0.184763	0.007549	0.286872	1.15383	1.17719	1.20203	1.11901	1.18594	1.21892	1.0685	1.1991	1.20774	0.796146	1.21964	1.21723	1.10344	1.20657	0.757735	1.12753	1.21966	1.28503	0.518556	0.335098	0.460761		S	2	___2	1	7.80898e-06	140.77	80.574	92.952
A8IXU9	1.1.1.2	PS.lightreaction.photosystem II.PSII polypeptide subunits	(chl4|521475 : 373.0) no description available & (at1g77090 : 185.0) Mog1/PsbP/DUF1795-like photosystem II reaction center PsbP family protein; FUNCTIONS IN: calcium ion binding; INVOLVED IN: photosynthesis; LOCATED IN: thylakoid, thylakoid lumen, chloroplast thylakoid lumen, chloroplast stroma, chloroplast; EXPRESSED IN: 21 plant structures; EXPRESSED DURING: 13 growth stages; CONTAINS InterPro …	Cre03.g198950.t1.2	1.02397	0.882775	0.888885	0.952013	0.977633	0.93048	0.310267	0.882479	0.956824	0.0368468	0.0549835	0.082756	0.0908282	0.0232541	0.0672668	1.0096	0.877349	0.806151	1.06584	0.940271	0.971663	0.996481	0.830707	0.888842	1.00409	0.973212	0.856131	0.847135	0.956907	0.987122	1.00481	1.00278	0.948189	0.565255	0.335376	0.199011		S	2	___1	1	0.000161298	169.41	129.76	169.41
Q6SA05	1.3.13	PS.calvin cycle.rubisco interacting	(chl4|522260 : 818.0) no description available & (p23489|rca_chlre : 816.0) Ribulose bisphosphate carboxylase/oxygenase activase, chloroplast precursor (RuBisCO activase) (RA) - Chlamydomonas reinhardtii & (loc_os11g47970.1 : 511.0) no description available & (at2g39730 : 506.0) Rubisco activase, a nuclear-encoded chloroplast protein that consists of two isoforms arising from alternative splicing…	Cre04.g229300.t1.1	1.3679	1.34636	1.33906	1.14325	1.18599	1.46567	0.49201	0.505426	0.641908	0.0717165	0.0756505	0.0119241	0.286898	0.299509	0.0693502	1.45004	1.43336	1.33594	1.33597	1.29606	1.329	1.31769	1.30966	1.35223	1.28446	1.39608	1.39607	0.81312	0.84303	1.53477	1.33218	1.31884	1.46617	0.407699	0.337949	0.400663		S	3	___1	1	0	344.29	289.12	146.67
A8ITL0	35.2	not assigned.unknown	(original description: Mitochondrial F1F0 ATP synthase associated 60.6 kDa protein OS=Chlamydomonas reinhardtii GN=ASA1 PE=4 SV=1)	Cre07.g340350.t1.1	0.961515	0.885835	0.907447	0.884725	0.976648	0.852222	0.27216	0.816964	1.80898	0.0649706	0.0623792	0.0318074	0.039115	0.0241471	0.0347393	0.890427	0.900306	0.870869	0.976299	0.939707	0.928606	1.01782	0.817492	0.922867	0.862206	0.949645	0.817353	0.862079	0.984133	0.852483	0.929891	0.996167	0.88683	0.799532	0.33826	0.796057		S	2	___1	1	0.000258588	156	100.23	156
A8IKZ5	35.2	not assigned.unknown	(original description: Predicted protein OS=Chlamydomonas reinhardtii GN=CHLREDRAFT_169813 PE=4 SV=1)	0	1.21921	1.03861	1.07641	1.16556	1.04768	1.12555	0.0150792	1.85085	0.301375	0.067732	0.120917	0.00443951	0.010951	0.115433	0.0127422	1.28926	1.12067	1.07244	1.15407	0.899752	1.07559	1.21428	1.09541	1.08121	1.16709	0.916074	1.11092	1.15393	1.09521	1.13151	1.17567	1.13176	1.13423	0.393231	0.338518	0.723276		S	2	___1	0.998087	5.53187e-43	205	162.91	161.55
A8J5X0	27.3.8	RNA.regulation of transcription.C2C2(Zn) DOF zinc finger family	(chl4|513289 : 423.0) no description available & (gnl|cdd|66392 : 117.0) no description available & (loc_os01g15900.1 : 98.2) no description available & (at5g39660 : 96.7) Dof-type zinc finger domain-containing protein, identical to H-protein promoter binding factor-2a GI:3386546 from (Arabidopsis thaliana). Interacts with LKP2 and FKF1, but its overexpression does not change flowering time under…	Cre12.g521150.t1.2	1.05043	0.951471	1.04059	1.06692	1.01528	0.968663	0.0209843	0.380189	0.303869	0.144654	0.0834238	0.0446124	0.0239643	0.123379	0.109082	1.17547	1.00817	1.03292	1.08381	0.990568	1.00032	0.892003	0.855678	1.08855	1.04116	1.10046	1.01708	1.08854	0.87379	0.843753	1.07107	1.07158	1.04515	0.755061	0.339144	0.183017		S	3	___1	1	2.33834e-18	146	116.9	73.919
A8J526	35.2	not assigned.unknown	(original description: Predicted protein (Fragment) OS=Chlamydomonas reinhardtii GN=CHLREDRAFT_150094 PE=4 SV=1)	0	1.37884	1.27706	1.13018	1.34941	1.28494	1.27753	0.340497	1.02234	0.391966	0.0756112	0.0245247	0.268772	0.0331784	0.0228181	0.00745495	1.46549	1.29742	1.27883	1.32624	1.24983	0.819916	1.34478	1.28393	1.29179	1.36529	1.27337	1.27169	1.37167	1.27023	1.27498	1.31128	1.31122	1.28593	0.548627	0.341576	0.856655		S	2	___1	0.992358	9.72623e-11	181.58	131.87	147.51
Q66YD0	27.3.99	RNA.regulation of transcription.unclassified	(chl4|514611 : 347.0) no description available & (at1g65260 : 195.0) Encodes a protein required for thylakoid membrane formation.; plastid transcriptionally active 4 (PTAC4); INVOLVED IN: vesicle organization, thylakoid membrane organization; LOCATED IN: in 8 components; EXPRESSED IN: 23 plant structures; EXPRESSED DURING: 15 growth stages; CONTAINS InterPro DOMAIN/s: PspA/IM30 (InterPro:IPR00715…	Cre13.g583550.t1.2	1.03002	0.932345	0.912548	1.04425	0.968744	1.0449	2.07484	1.99955	1.19696	0.0673328	0.0345704	0.051173	0.0302793	0.0147268	0.0256891	0.955029	0.894307	0.855366	1.04973	0.940881	0.92824	1.0853	0.961848	0.954037	1.01251	0.955529	1.05522	1.04743	0.966083	1.06383	1.07282	0.98462	1.01566	0.0603829	0.341588	0.655061		T	2	___1	0.968176	7.65487e-05	138.31	89.008	79.875
A8I8N5	35.2	not assigned.unknown	(original description: Predicted protein OS=Chlamydomonas reinhardtii GN=CHLREDRAFT_186587 PE=4 SV=1)	Cre02.g086600.t1.2	1.01635	0.947906	1.07245	1.04181	1.05415	1.10915	1.15432	1.20497	0.326368	0.10454	0.0943797	0.0227241	0.00803111	0.00915586	0.0320118	1.13704	0.997149	1.05454	0.957904	1.00748	1.09801	0.954106	0.839089	1.06478	1.03881	1.04536	1.14423	1.05091	1.05346	1.10171	1.03571	1.06363	1.08152	0.81533	0.342673	0.180897		S	2	___2	0.999999	4.76406e-17	174.87	125.81	139.02
A8I8N5	35.2	not assigned.unknown	(original description: Predicted protein OS=Chlamydomonas reinhardtii GN=CHLREDRAFT_186587 PE=4 SV=1)	Cre02.g086600.t1.2	1.01635	0.94312	1.07245	1.04181	1.05415	1.10915	1.14153	1.17764	0.341566	0.10454	0.102657	0.0227241	0.00803111	0.00915586	0.0320118	1.13704	0.997149	1.05454	0.957904	1.00748	1.09801	0.954106	0.824732	1.06478	1.03881	1.04536	1.14423	1.05091	1.05346	1.10171	1.03571	1.06363	1.08152	0.81533	0.342673	0.186715		S	2	___2	1	5.42533e-69	220.1	175.29	139.02
A8IQS4	35.2	not assigned.unknown	(original description: Predicted protein OS=Chlamydomonas reinhardtii GN=CHLREDRAFT_145319 PE=4 SV=1)	0	0.885766	0.886904	0.851146	0.867015	0.838004	0.851018	0.663483	0.292435	0.276465	0.0593362	0.0415122	0.0207488	0.0392197	0.0273524	0.0125171	0.954176	0.922057	0.833616	0.848278	0.897549	0.874054	0.854843	0.841106	0.845767	0.856132	0.819751	0.857239	0.834386	0.869453	0.859205	0.910527	0.82481	0.836609	0.19689	0.343046	0.729108		S	2	___2	0.999917	6.81509e-10	137.86	114.94	136.02
A8I2K3	35.2	not assigned.unknown	(original description: FhlA domain-contained protein kinase (Fragment) OS=Chlamydomonas reinhardtii GN=CHLREDRAFT_166537 PE=4 SV=1)	0	0.886836	0.971817	0.956161	0.86115	0.995618	1.09413	0.706354	2.09161	0.792634	0.0382175	0.102314	0.120644	0.0168098	0.0431339	0.0330897	0.930835	1.04294	0.816853	0.867778	0.854559	1.02569	0.861895	1.01795	1.02595	0.863741	0.991622	1.05751	0.876513	1.04061	1.12188	0.843195	0.954621	1.10301	0.662396	0.345224	0.986539		S	2	___1	1	0.0030048	94.569	73.218	94.569
A8JBY2	35.2	not assigned.unknown	(original description: Flagellar associated protein OS=Chlamydomonas reinhardtii GN=FAP116 PE=1 SV=1)	Cre11.g467739.t1.1	1.23883	1.25226	1.25644	1.21939	1.26135	1.38141	1.03464	1.90459	1.45009	0.0734217	0.025316	0.00898553	0.0130069	0.0418072	0.0612796	1.32321	1.27897	1.26589	1.18955	1.22862	1.25542	1.20373	1.24917	1.248	1.21718	1.30889	1.31655	1.23336	1.23031	1.43834	1.20763	1.24487	1.38935	0.826831	0.346623	0.45903		S	2	___1	0.999991	1.59583e-07	141.37	111.44	122.52
A8HNB0	35.2	not assigned.unknown	(original description: Predicted protein (Fragment) OS=Chlamydomonas reinhardtii GN=CHLREDRAFT_146880 PE=4 SV=1)	0	0.931987	1.11465	1.1101	1.01993	1.09556	1.17201	1.21913	4.08157	0.861079	0.0859067	0.0283436	0.0144488	0.0464381	0.0151508	0.0340313	0.933855	1.13785	1.10975	1.01694	1.08306	1.09583	0.845162	1.12304	1.12472	1.03755	1.10926	1.13706	1.05498	1.09813	1.20504	0.96726	1.07929	1.17394	0.653003	0.347393	0.719844		S	2	___2	0.995654	0.0109587	65.565	8.7908	52.599
A8HNB0	35.2	not assigned.unknown	(original description: Predicted protein (Fragment) OS=Chlamydomonas reinhardtii GN=CHLREDRAFT_146880 PE=4 SV=1)	0	0.955781	1.11465	1.1101	1.01993	1.09556	1.17201	1.13934	4.36903	0.841028	0.0655841	0.0283436	0.0144488	0.0464381	0.0151508	0.0340313	0.96387	1.13785	1.10975	1.01694	1.08306	1.09583	0.886527	1.12304	1.12472	1.03755	1.10926	1.13706	1.05498	1.09813	1.20504	0.96726	1.07929	1.17394	0.714917	0.347393	0.786337		T	2	___2	0.970559	0.0109587	65.565	8.7908	52.599
A8IMC5	31.4	cell.vesicle transport	(chl4|524098 : 472.0) no description available & (ipr011989 : 244.895) Armadillo-like helical & (at1g31730 : 204.0) Adaptin family protein; FUNCTIONS IN: clathrin binding, binding; INVOLVED IN: intracellular protein transport, vesicle-mediated transport; LOCATED IN: membrane coat; EXPRESSED IN: 24 plant structures; EXPRESSED DURING: 13 growth stages; CONTAINS InterPro DOMAIN/s: Armadillo-like hel…	0	1.14906	1.06054	1.19549	1.1457	1.1987	1.27036	0.939959	0.879043	0.398501	0.0598783	0.189473	0.0120543	0.00465661	0.0067129	0.0769539	1.2164	0.842454	1.19451	1.10182	1.15444	1.208	1.12897	1.18472	1.18395	1.14201	1.2037	1.19129	1.14417	1.19107	1.345	1.15093	1.20132	1.27478	0.483703	0.349182	0.346056		S	2	___1	1	6.28132e-268	258.68	178.36	258.68
A8J6K9	29.5.11.20	protein.degradation.ubiquitin.proteasom	(chl4|517599 : 464.0) no description available & (gnl|cdd|35397 : 368.0) no description available & (gnl|cdd|48451 : 363.0) no description available & (q9m4t8|psa5_soybn : 357.0) Proteasome subunit alpha type 5 (EC 3.4.25.1) (20S proteasome alpha subunit E) (20S proteasome subunit alpha-5) - Glycine max (Soybean) & (at1g53850 : 356.0) Encodes alpha5 subunit of 20s proteosome involved in protein d…	Cre17.g724350.t1.2	0.912748	0.911113	0.849764	0.901161	0.974104	1.01257	1.29497	0.171621	0.864106	0.0745003	0.0300827	0.104869	0.103034	0.0259531	0.0215159	0.985195	0.929874	0.774175	0.916697	0.92705	0.805629	0.836352	0.876415	0.969487	0.820412	1.00277	0.989065	0.865868	0.952213	1.01734	1.0172	0.967325	1.0313	0.659101	0.349659	0.0646762		S	2	___1	0.921917	0.00619606	86.699	64.013	71.933
A8HNG8	35.2	not assigned.unknown	(original description: Uncharacterized lumenal polypeptide OS=Chlamydomonas reinhardtii GN=ULP1 PE=4 SV=1)	Cre01.g051500.t1.2	1.13293	1.10022	1.13349	1.07567	1.11967	1.13854	0.28553	0.55272	0.768515	0.040696	0.021335	0.0130897	0.0647615	0.0155904	0.0234286	1.14758	1.08212	1.13395	1.16427	1.12374	1.12018	1.08694	1.09479	1.14635	1.11983	1.10952	1.11606	1.10585	1.11186	1.13673	1.00133	1.13762	1.16282	0.778065	0.351597	0.877761		S	3	___1	1	0.000114898	108.68	83.847	105.2
A8JA64	35.2	not assigned.unknown	(original description: Predicted protein OS=Chlamydomonas reinhardtii GN=CHLREDRAFT_193345 PE=4 SV=1)	0	1.0066	1.12963	1.1276	1.16506	1.16021	1.16733	0.57976	0.161801	0.169054	0.257351	0.0704186	0.0955837	0.110306	0.115327	0.0900902	1.30374	1.09596	1.04195	0.854776	1.21057	1.11015	0.861279	1.08238	1.23071	1.03948	1.21718	1.25145	1.24628	1.23596	1.07227	1.20943	1.02748	1.17827	0.840774	0.351712	0.543827		S	3	___2	0.999999	2.70889e-14	89.445	75.782	66.419
A8JF01	35.2	not assigned.unknown	(original description: Predicted protein OS=Chlamydomonas reinhardtii GN=CHLREDRAFT_194492 PE=4 SV=1)	0	1.03391	1.07818	1.0215	1.02603	0.873862	0.859982	3.57814	1.45908	1.7953	0.106253	0.0210818	0.0382327	0.0396458	0.0267551	0.0256753	1.13713	1.09588	1.04228	0.924862	1.05486	0.977382	1.03973	1.08381	1.04486	1.06093	0.902594	0.84905	1.03425	0.849663	0.841583	0.982925	0.869328	0.889315	0.0899875	0.352104	0.0195003		S	2	___1	0.999787	0.000863464	84.66	58.585	84.66
A8J0E4	1.1.1.2	PS.lightreaction.photosystem II.PSII polypeptide subunits	(chl4|519678 : 481.0) no description available & (p12853|psbo_chlre : 478.0) Oxygen-evolving enhancer protein 1, chloroplast precursor (OEE1) - Chlamydomonas reinhardtii & (gnl|cdd|65505 : 354.0) no description available & (at5g66570 : 286.0) Encodes a protein which is an extrinsic subunit of photosystem II and which has been proposed to play a central role in stabilization of the catalytic manga…	Cre09.g396213.t1.1	0.998465	1.061	1.04791	1.03882	0.977444	1.06814	0.0544482	0.112858	0.238926	0.148609	0.0298525	0.0270028	0.175165	0.119951	0.0170959	0.920425	1.09371	1.03186	0.905134	1.05406	1.0328	1.16984	1.03523	1.07909	1.11915	1.05905	1.08261	0.837899	0.83972	1.04928	1.15942	1.03356	1.07253	0.252748	0.353046	0.914461		S	3	___1	0.978625	9.78557e-12	109.51	88.336	78.552
A8J1X8	29.1.12	protein.aa activation.aspartate-tRNA ligase	(chl4|523453 : 993.0) no description available & (gnl|cdd|35776 : 698.0) no description available & (loc_os02g46130.1 : 550.0) no description available & (at4g31180 : 521.0) Class II aminoacyl-tRNA and biotin synthetases superfamily protein; FUNCTIONS IN: aminoacyl-tRNA ligase activity, aspartate-tRNA ligase activity, nucleotide binding, ATP binding, nucleic acid binding; INVOLVED IN: response to…	Cre06.g279150.t1.2	1.1469	1.10577	1.10664	1.00088	1.11523	1.10088	0.658817	0.159068	0.692718	0.0760323	0.0340088	0.0239392	0.162196	0.0421485	0.02432	1.22386	1.09114	1.10633	1.14501	1.08153	1.13074	1.07183	1.14465	1.08286	1.09148	1.16161	1.0729	1.09753	1.07926	1.11273	0.813624	1.10481	1.11699	0.558711	0.353249	0.435869		S	3	___1	0.999976	1.57166e-29	165.03	139.05	72.913
A8IWK7	35.2	not assigned.unknown	(original description: Predicted protein OS=Chlamydomonas reinhardtii GN=CHLREDRAFT_147368 PE=4 SV=1)	Cre03.g194150.t1.1	0.860917	0.988634	1.08057	0.973665	0.964073	0.846886	0.74159	0.44023	2.33248	0.045366	0.120582	0.00927818	0.0815102	0.0863419	0.0274272	0.911374	0.851281	1.07088	0.847882	1.03754	1.08937	0.823496	1.07708	1.08147	0.883637	1.0108	0.823994	0.994908	0.864438	0.839378	1.04245	1.01698	0.877285	0.677208	0.353829	0.886683		S	2	___1	0.770096	1.25216e-57	223.68	152.86	178.47
A8IAC7	29.2.3	protein.synthesis.initiation	(chl4|518507 : 1165.0) no description available & (gnl|cdd|36359 : 658.0) no description available & (loc_os05g51500.1 : 658.0) no description available & (at1g76810 : 655.0) eukaryotic translation initiation factor 2 (eIF-2) family protein; FUNCTIONS IN: translation factor activity, nucleic acid binding, GTP binding, GTPase activity; LOCATED IN: plasma membrane; EXPRESSED IN: 25 plant structures…	0	1.13666	1.34906	1.36548	1.2245	1.37184	1.50919	2.00403	4.68017	0.612635	0.10304	0.0368817	0.00488062	0.0317347	0.046847	0.0743433	1.18181	1.38976	1.35996	1.01875	1.31785	1.36923	1.20942	1.33957	1.36725	1.2518	1.42353	1.43959	1.23202	1.35982	1.58751	1.18968	1.33218	1.50046	0.527589	0.354404	0.746666		S	2	___1	1	7.47846e-41	210.67	169.24	153.41
A8IDG9	35.2	not assigned.unknown	(original description: Uncharacterized protein OS=Chlamydomonas reinhardtii GN=CHLREDRAFT_205593 PE=4 SV=1)	Cre03.g179941.t1.1	1.03637	0.902372	0.875058	0.91142	0.934816	0.970296	0.00581939	0.185083	0.580061	0.13096	0.0916421	0.0276513	0.181722	0.12624	0.0461649	1.11631	0.836859	0.847458	1.10756	1.0071	0.874955	0.885231	0.86316	0.902761	0.846383	1.04114	0.930923	0.771167	0.968012	0.958862	1.11671	0.795295	1.0211	0.958557	0.355039	0.382896		S	2	___1	0.845679	2.31872e-160	251.28	218.53	96.435
A8IUC5	35.2	not assigned.unknown	(original description: Uncharacterized protein OS=Chlamydomonas reinhardtii GN=CHLREDRAFT_146167 PE=4 SV=1)	0	0.895502	0.976205	1.01637	0.88349	1.00723	1.06842	0.398682	2.7149	0.202057	0.0786188	0.0817204	0.0158381	0.0535443	0.0175909	0.0595981	0.982923	1.0128	1.02412	0.872981	0.882583	1.02684	0.830601	1.03324	0.998146	0.911711	1.02269	1.00389	0.917021	0.988093	1.1214	0.821739	1.01091	1.07996	0.496982	0.355075	0.873352		S	2	___1	0.992974	3.96315e-11	162.67	97.722	124.81
A8J925	35.2	not assigned.unknown	(original description: Predicted protein (Fragment) OS=Chlamydomonas reinhardtii GN=CHLREDRAFT_151343 PE=4 SV=1)	0	0.872027	0.881797	0.901261	0.857582	0.922622	0.867913	0.0392819	0.425576	0.449281	0.0731919	0.0242852	0.00531711	0.00475085	0.0292296	0.0706422	0.956269	0.885138	0.907351	0.835786	0.904239	0.898891	0.824026	0.856014	0.897541	0.852108	0.889447	0.843476	0.860009	0.944591	0.947529	0.86063	0.933827	0.812734	0.0972657	0.355424	0.822198		S	2	___1	0.946529	0.0100234	113.22	69.917	113.22
A8IZB2	35.2	not assigned.unknown	(original description: Predicted protein OS=Chlamydomonas reinhardtii GN=CHLREDRAFT_196913 PE=4 SV=1)	Cre08.g377700.t1.1	0.934138	0.879054	1.11404	0.899764	0.854364	0.959693	1.98701	3.67583	1.10591	0.0496242	0.040022	0.0379782	0.0903439	0.0260762	0.0212198	0.988882	0.924693	1.12651	0.892108	0.849943	1.14421	0.921423	0.862525	1.07139	0.927062	0.869386	0.98384	0.798919	0.824254	0.944015	0.973311	0.869452	0.951225	0.272321	0.356739	0.783927		Y	3	___1	0.992449	0.00444612	45.88	21.485	45.88
A8JAQ5	35.2	not assigned.unknown	(original description: Flagellar associated protein OS=Chlamydomonas reinhardtii GN=ANK17 PE=4 SV=1)	0	0.904164	1.04518	0.986346	0.905717	1.018	1.01221	0.000489026	0.722378	0.0336694	0.0662018	0.0565684	0.154241	0.062151	0.146081	0.157355	0.949057	1.07228	1.07056	0.9353	1.0831	1.08015	0.828134	0.98016	0.80833	0.958787	1.09669	1.09204	0.837344	1.10786	0.830944	0.92102	0.849441	1.11365	0.775957	0.357666	0.404516		S	2	___3	0.995975	2.83549e-12	171.33	152.05	135.36
A8J3N4	35.2	not assigned.unknown	(chl4|516587 : 382.0) no description available & (loc_os01g23680.1 : 248.0) no description available & (at2g43945 : 241.0) unknown protein; LOCATED IN: chloroplast; BEST Arabidopsis thaliana protein match is: unknown protein (TAIR:AT3G59870.1); Has 292 Blast hits to 292 proteins in 84 species: Archae - 0; Bacteria - 122; Metazoa - 0; Fungi - 0; Plants - 46; Viruses - 0; Other Eukaryotes - 124 (so…	0	1.07311	0.952917	0.958445	0.987188	0.984873	1.03313	0.0502501	0.216127	0.3838	0.13614	0.0952923	0.116407	0.105257	0.0955538	0.0634497	1.16345	1.04222	1.01521	1.13935	0.852591	0.824545	0.916524	0.963945	1.03558	1.04556	1.07249	1.04293	1.05033	0.999146	1.0911	0.865679	0.882985	0.965346	0.690077	0.357771	0.2194		S	3	___1	0.893797	1.51928e-23	181.94	159.54	50.945
A8I1H1	35.2	not assigned.unknown	(original description: Predicted protein (Fragment) OS=Chlamydomonas reinhardtii GN=CHLREDRAFT_143210 PE=4 SV=1)	0	0.935722	0.96552	0.959382	0.908023	0.888077	1.03092	0.141648	0.867833	0.760308	0.0789463	0.0220057	0.0804549	0.0840736	0.0554002	0.0462974	0.86809	0.969533	0.883459	0.916605	0.941785	0.950977	1.02247	0.985244	1.04371	1.00332	0.950818	1.06359	0.844344	0.845896	0.97794	0.876402	0.867517	1.05123	0.0947714	0.358958	0.241609		T	3	___1	0.99996	0.0020593	73.464	49.665	69.125
A8HNG7	35.2	not assigned.unknown	(original description: Predicted protein OS=Chlamydomonas reinhardtii GN=CHLREDRAFT_190150 PE=4 SV=1)	#N/A	0.890578	1.03578	1.13656	0.974496	1.15904	1.19744	1.13405	2.442	0.0684743	0.0982525	0.163988	0.0201209	0.132629	0.0101982	0.0372191	1.00017	1.1387	1.11348	0.810379	1.12198	1.15042	0.861183	0.846673	1.14576	1.03494	1.15895	1.16308	1.06614	1.14889	1.23698	0.822412	1.16928	1.19227	0.591389	0.361476	0.514753		S	2	___2	1	2.46549e-149	259.55	195.24	77.39
A8J225	35.2	not assigned.unknown	(original description: Low-CO2-inducible protein (Fragment) OS=Chlamydomonas reinhardtii GN=LCI23 PE=4 SV=1)	Cre06.g281600.t2.1	1.05849	1.02977	1.23319	1.02662	1.00451	1.09543	0.822952	1.48689	0.304291	0.058366	0.157746	0.0283956	0.0942597	0.0965116	0.0310023	1.10016	1.1329	1.20147	1.08353	1.10824	1.24182	0.991784	0.84818	1.25626	0.986115	1.07457	1.10413	1.13436	0.894428	1.12116	0.959382	1.04454	1.06101	0.124396	0.362609	0.936797		S	2	___2	0.99969	2.10871e-68	218.83	155.14	71.592
A8ID17	31.1	cell.organisation	(chl4|509594 : 1533.0) no description available & (gnl|cdd|30094 : 441.0) no description available & (gnl|cdd|39481 : 297.0) no description available & (at5g47820 : 246.0) encodes a kinesin-like protein with an N-terminal microtubule binding motor domain. Protein is localized to the periphery of the cytoplasm and mutants in the gene exhibit altered orientation of cellulose microfibrils and reduce…	0	1.15656	1.04704	1.04201	1.06208	1.06379	1.0374	0.481198	0.886245	0.611828	0.121537	0.0255359	0.0281278	0.0308177	0.0460057	0.021559	1.29383	1.05179	1.03359	1.11318	1.01946	1.07338	1.06266	1.06986	1.01905	1.09524	1.11232	1.05807	1.0567	1.02081	1.03908	1.03431	1.05824	1.01505	0.680429	0.363055	0.508262		S	2	___2	0.999999	6.15587e-15	133.98	103.98	124.4
A8ID17	31.1	cell.organisation	(chl4|509594 : 1533.0) no description available & (gnl|cdd|30094 : 441.0) no description available & (gnl|cdd|39481 : 297.0) no description available & (at5g47820 : 246.0) encodes a kinesin-like protein with an N-terminal microtubule binding motor domain. Protein is localized to the periphery of the cytoplasm and mutants in the gene exhibit altered orientation of cellulose microfibrils and reduce…	0	1.15656	1.04704	1.04201	1.06208	1.06379	1.0374	0.481198	0.886245	0.611828	0.121537	0.0255359	0.0281278	0.0308177	0.0460057	0.021559	1.29383	1.05179	1.03359	1.11318	1.01946	1.07338	1.06266	1.06986	1.01905	1.09524	1.11232	1.05807	1.0567	1.02081	1.03908	1.03431	1.05824	1.01505	0.680429	0.363055	0.508262		S	2	___2	0.99882	6.15587e-15	133.98	103.98	124.4
A8IT39	35.2	not assigned.unknown	(original description: Predicted protein OS=Chlamydomonas reinhardtii GN=CHLREDRAFT_171021 PE=4 SV=1)	0	0.927528	1.03392	1.09925	0.870791	0.977746	1.00805	1.18366	2.09381	0.0512057	0.0356082	0.0770795	0.0312748	0.00989697	0.117254	0.0916329	0.95229	0.949743	1.07901	0.943574	1.05096	1.13527	0.88672	1.10105	1.08348	0.87462	0.847732	1.10719	0.878202	1.07547	0.926464	0.859552	1.01003	0.990492	0.615109	0.363614	0.446059		S	2	___1	0.999925	0.000337322	149.6	128.35	109.1
A8IJ60	29.5.5	protein.degradation.serine protease	(chl4|512864 : 671.0) no description available & (gnl|cdd|80601 : 268.0) no description available & (gnl|cdd|36058 : 259.0) no description available & (at5g45390 : 229.0) One of several nuclear-encoded ClpPs (caseinolytic protease). Contains a highly conserved catalytic triad of Ser-type proteases (Ser-His-Asp). The name reflects nomenclature described in Adam et. al (2001).; CLP protease P4 (CLP…	Cre12.g500950.t1.2	0.919709	0.849007	0.896825	0.836645	0.922329	0.835282	0.370025	0.0671867	1.01953	0.0478613	0.0534065	0.0267788	0.0855538	0.0902172	0.0344651	0.888748	0.872013	0.91268	0.974835	0.887056	0.865907	0.895544	0.787953	0.911888	0.933742	0.822889	0.837756	0.803867	0.945163	0.799646	0.772327	0.998936	0.868443	0.512327	0.363645	0.855924		S	2	___1	0.999192	3.43267e-05	144.68	105.05	109.42
A8IC90	27.1	RNA.processing	(chl4|509720 : 707.0) no description available & (gnl|cdd|37785 : 512.0) no description available & (at1g60170 : 366.0) embryo defective 1220 (emb1220); CONTAINS InterPro DOMAIN/s: Pre-mRNA processing ribonucleoprotein, snoRNA-binding domain (InterPro:IPR002687), NOSIC (InterPro:IPR012976), Prp31 C-terminal (InterPro:IPR019175); BEST Arabidopsis thaliana protein match is: unknown protein (TAIR:AT…	Cre10.g424850.t1.2	1.0208	0.947849	0.880766	0.952806	0.950994	0.867896	0.401313	1.58674	0.222102	0.076697	0.0117497	0.0170617	0.111049	0.0626332	0.0301981	0.946083	0.935133	0.888762	1.01698	0.95011	0.892362	1.09933	0.958304	0.861175	0.992768	0.984582	0.849009	0.827307	0.989668	0.851954	1.03835	0.878731	0.902724	0.725142	0.363829	0.718055		S	2	___1	0.896842	2.67738e-05	137.73	92.611	78.508
A8IVW0	35.2	not assigned.unknown	(original description: Predicted protein OS=Chlamydomonas reinhardtii GN=CHLREDRAFT_190332 PE=4 SV=1)	0	0.906765	0.892743	0.859193	0.938677	0.895129	0.887139	0.511202	0.805179	0.0960165	0.0672489	0.0301815	0.0509412	0.00428923	0.0464012	0.00791742	0.981598	0.901478	0.863759	0.887308	0.917594	0.907697	0.85139	0.859157	0.806122	0.93637	0.842158	0.886856	0.936034	0.928586	0.895195	0.943626	0.914643	0.879367	0.571674	0.364577	0.0415014		S	2	___1	0.956368	0.000857421	111.66	68.114	111.66
A8J5U1	29.1	protein.aa activation	(chl4|513313 : 818.0) no description available & (gnl|cdd|37356 : 613.0) no description available & (loc_os12g35570.1 : 585.0) no description available & (at3g04600 : 577.0) Nucleotidylyl transferase superfamily protein; FUNCTIONS IN: nucleotide binding, tryptophan-tRNA ligase activity, aminoacyl-tRNA ligase activity, ATP binding; INVOLVED IN: tRNA aminoacylation for protein translation, tryptoph…	Cre12.g522350.t1.2	0.930356	1.13315	1.15603	0.97924	1.01263	1.21832	0.0211865	1.99345	0.520071	0.13461	0.0210287	0.0102913	0.125066	0.180335	0.0605635	1.0848	1.15709	1.16604	0.837956	1.11768	1.14548	0.868314	1.12467	1.15658	1.02594	1.12665	1.15705	1.07423	1.10652	1.27815	0.837543	0.804725	1.21974	0.5261	0.365047	0.584675		Y	2	___1	1	0.0271064	66.056	26.271	66.056
A8IQS4	35.2	not assigned.unknown	(original description: Predicted protein OS=Chlamydomonas reinhardtii GN=CHLREDRAFT_145319 PE=4 SV=1)	0	0.882323	0.841657	0.866033	0.850627	0.880144	0.842165	0.121651	0.0686517	0.596009	0.0431884	0.0448712	0.00648015	0.0257951	0.045248	0.0447214	0.923645	0.792869	0.860901	0.88584	0.850944	0.873315	0.837484	0.881158	0.863884	0.822272	0.836757	0.845511	0.856907	0.876627	0.795865	0.872702	0.927047	0.88512	0.561017	0.365286	0.175904		S	2	___2	0.999998	0.00819959	89.344	80.385	89.344
A8I7D9	35.2	not assigned.unknown	(original description: Predicted protein OS=Chlamydomonas reinhardtii GN=CHLREDRAFT_187548 PE=4 SV=1)	0	1.11402	0.999914	0.921902	1.08419	0.833064	0.939057	1.53346	4.15378	1.62824	0.0127758	0.0303145	0.0809273	0.0521367	0.0347839	0.0650856	1.10082	0.966221	0.991548	1.11491	1.02498	0.941034	1.12632	1.00854	0.833122	1.03636	0.798231	0.898853	1.07645	0.833162	0.90417	1.13977	0.867798	1.01415	0.249069	0.368647	0.88466		S	3	___1	0.998217	1.26795e-06	74.13	56.336	74.13
A8IZW5	30.5	signalling.G-proteins	(chl4|525971 : 237.0) no description available & (loc_os03g18180.1 : 140.0) no description available & (at5g58590 : 136.0) Encodes a Ran-binding protein 1 homolog (RanBP1).; RAN binding protein 1 (RANBP1); FUNCTIONS IN: protein binding; INVOLVED IN: protein import into nucleus, translocation; LOCATED IN: cellular_component unknown; EXPRESSED IN: 23 plant structures; EXPRESSED DURING: 14 growth st…	0	0.96216	0.99865	0.991805	0.933967	0.991628	1.10137	0.819791	2.91611	2.01672	0.0446001	0.0321583	0.0286792	0.037856	0.00455446	0.0420271	1.01349	1.03405	0.96558	0.932891	0.971243	1.02243	0.940098	0.990657	0.987405	0.90946	0.991466	1.05463	0.977568	0.987158	1.13603	0.914873	0.996262	1.11347	0.702005	0.369569	0.585544		S	2	___1	1	1.00313e-20	192.4	144.69	177.21
A8HNG7	35.2	not assigned.unknown	(original description: Predicted protein OS=Chlamydomonas reinhardtii GN=CHLREDRAFT_190150 PE=4 SV=1)	#N/A	0.905024	1.04294	1.13656	0.972113	1.15904	1.19744	1.14172	2.6862	0.0766315	0.0490085	0.15161	0.0201209	0.13673	0.0101982	0.0372191	0.961217	1.1387	1.11348	0.882724	1.12198	1.15042	0.871131	0.868143	1.14576	1.03494	1.15895	1.16308	1.06614	1.14889	1.23698	0.815262	1.16928	1.19227	0.529362	0.370494	0.559147		S	2	___2	1	2.48497e-26	193.72	148.91	77.39
A8JAU1	35.2	not assigned.unknown	(original description: Predicted protein OS=Chlamydomonas reinhardtii GN=CHLREDRAFT_177662 PE=4 SV=1)	0	0.910688	0.899898	0.876682	0.876601	0.89817	0.896223	0.0827259	0.0390291	0.173986	0.0456074	0.0366459	0.0672348	0.0738998	0.0280036	0.0406557	0.959247	0.857968	0.799282	0.904058	0.925797	0.910143	0.868758	0.915928	0.920621	0.944145	0.876389	0.857651	0.797668	0.929758	0.892335	0.887989	0.888363	0.938683	0.720771	0.371293	0.897422		S	2	___1	0.823672	0.0010569	87.554	35.381	87.554
A8J0M0	35.2	not assigned.unknown	(original description: Predicted protein (Fragment) OS=Chlamydomonas reinhardtii GN=CHLREDRAFT_191474 PE=4 SV=1)	0	1.01085	0.951093	0.970254	1.02615	0.995214	1.1214	0.928241	0.414453	0.395453	0.0138439	0.116986	0.128326	0.0191651	0.119568	0.04341	0.994931	1.08612	1.02997	1.02003	0.880195	0.822952	1.0176	0.886964	1.05784	1.01158	1.07931	1.0846	1.019	0.858337	1.16927	1.04786	1.048	1.11031	0.577285	0.371351	0.217775		S	2	___2	0.988633	9.37419e-05	137.27	73.305	99.238
A8ICF4	19.21	tetrapyrrole synthesis.heme oxygenase	(chl4|509690 : 309.0) no description available & (at1g69720 : 149.0) Encodes a member (HO3) of the heme oxygenase family.; heme oxygenase 3 (HO3); FUNCTIONS IN: heme oxygenase (decyclizing) activity, heme binding; INVOLVED IN: oxidation reduction, heme oxidation; LOCATED IN: chloroplast; EXPRESSED IN: 20 plant structures; EXPRESSED DURING: 11 growth stages; CONTAINS InterPro DOMAIN/s: Haem oxygen…	0	1.04465	1.08162	1.02951	1.12295	0.921099	1.09475	0.0369117	0.337438	0.76494	0.157823	0.011862	0.173228	0.03203	0.152017	0.0084851	0.86374	1.06969	1.13343	1.15411	1.08176	1.12556	1.11611	1.09341	0.82953	1.08606	0.822843	1.1045	1.14368	0.844257	1.08898	1.1391	1.0962	1.09078	0.890992	0.372048	0.362819		S	2	___2	0.999965	0.0091697	72.152	15.721	68.536
A8JBY2	35.2	not assigned.unknown	(original description: Flagellar associated protein OS=Chlamydomonas reinhardtii GN=FAP116 PE=1 SV=1)	Cre11.g467739.t1.1	0.951229	0.993964	0.969174	1.05699	1.01066	1.03672	1.6125	0.000795058	0.438052	0.112236	0.0108748	0.026585	0.0243975	0.0227998	0.0426897	0.917963	1.0062	0.945813	1.07634	0.985414	0.963608	0.859386	0.990274	0.998101	1.02981	1.03622	1.00415	1.06419	1.00336	1.08505	1.07698	0.992406	1.02097	0.0744867	0.373112	0.190715		S	2	___2	0.997138	1.59583e-07	127.5	94.231	127.5
A8JBY2	35.2	not assigned.unknown	(original description: Flagellar associated protein OS=Chlamydomonas reinhardtii GN=FAP116 PE=1 SV=1)	Cre11.g467739.t1.1	0.928599	0.993964	0.969174	1.05699	1.01066	1.03672	1.628	0.0249304	0.544569	0.128143	0.0108748	0.026585	0.0243975	0.0227998	0.0426897	0.861841	1.0062	0.945813	1.07634	0.985414	0.963608	0.847618	0.990274	0.998101	1.02981	1.03622	1.00415	1.06419	1.00336	1.08505	1.07698	0.992406	1.02097	0.117784	0.373112	0.197078		S	2	___2	0.999991	1.59583e-07	141.37	111.44	122.52
A8JAQ5	35.2	not assigned.unknown	(original description: Flagellar associated protein OS=Chlamydomonas reinhardtii GN=ANK17 PE=4 SV=1)	0	0.910752	1.04274	1.04786	0.90936	1.02436	1.10479	0.313947	4.91699	0.669496	0.0129532	0.0302029	0.00468288	0.0618098	0.0322378	0.0450113	0.925306	1.07756	1.04309	0.900489	1.02703	1.04804	0.906461	1.02364	1.05245	0.89174	0.988475	1.06205	0.978067	1.05087	1.15177	0.858273	1.03373	1.10053	0.635601	0.373154	0.970623		T	2	___2	1	2.46446e-09	143.72	122.77	111.57
A8HQ22	35.2	not assigned.unknown	(chl4|511113 : 1964.0) no description available & (at5g16280 : 307.0) Tetratricopeptide repeat (TPR)-like superfamily protein; INVOLVED IN: biological_process unknown; LOCATED IN: endomembrane system; EXPRESSED IN: 22 plant structures; EXPRESSED DURING: 13 growth stages. & (loc_os03g57300.1 : 278.0) no description available & (gnl|cdd|37149 : 194.0) no description available (original description:…	0	1.06043	0.884299	1.09782	1.07798	1.07008	0.87571	0.0335219	0.322251	1.12581	0.215659	0.0698031	0.0347215	0.226696	0.105328	0.0395535	0.949169	0.948415	1.06577	0.92312	0.894542	1.09298	1.309	0.80994	1.13471	1.18374	1.14694	0.84988	0.817731	0.950025	0.921245	1.23247	1.11329	0.856005	0.555404	0.373556	0.929497		T	3	___2	0.999968	0.00304542	54.559	36.458	54.559
A8IXN3	35.2	not assigned.unknown	(original description: DnaJ-like zinc-finger protein OS=Chlamydomonas reinhardtii GN=ZNJ2 PE=4 SV=1)	0	0.967952	1.08692	1.14435	1.15466	1.10826	1.03129	0.304507	0.0984803	1.25055	0.171097	0.0437774	0.0334921	0.016698	0.0497811	0.140837	0.893945	1.04015	1.16862	0.846316	1.09368	1.15828	1.16359	1.12692	1.10614	1.14333	1.05174	1.12863	1.14681	1.14562	1.09543	1.17383	1.1274	0.869794	0.431427	0.374062	0.477345		S	2	___1	0.99972	6.34888e-29	203.05	161.81	151.11
A8HRL0	35.2	not assigned.unknown	(original description: Predicted protein OS=Chlamydomonas reinhardtii GN=CHLREDRAFT_168414 PE=4 SV=1)	0	0.983845	1.05746	1.05995	0.935228	1.05197	1.14819	0.155421	2.33652	0.741509	0.0768184	0.012447	0.0176234	0.105949	0.0146436	0.0671289	1.058	1.07118	1.04718	0.988913	1.04689	1.0526	0.904619	1.05432	1.08005	0.978244	1.06491	1.07647	1.0129	1.05493	1.20951	0.814536	1.03607	1.15861	0.583619	0.375018	0.935142		S	2	___2	0.998885	4.97178e-31	207.08	178.31	160.03
A8HWS8	29.2.1.1.1.2.28	protein.synthesis.ribosomal protein.prokaryotic.chloroplast.50S subunit.L28	(chl4|523163 : 350.0) no description available & (at2g33450 : 85.9) Ribosomal L28 family; FUNCTIONS IN: structural constituent of ribosome; INVOLVED IN: translation; LOCATED IN: ribosome, chloroplast, membrane; EXPRESSED IN: 22 plant structures; EXPRESSED DURING: 13 growth stages; CONTAINS InterPro DOMAIN/s: Ribosomal protein L28 (InterPro:IPR001383); Has 3594 Blast hits to 3594 proteins in 1265 …	Cre06.g265800.t1.2	0.953312	0.945927	0.966892	1.0118	0.976812	0.981021	0.592849	0.0776415	0.0856442	0.113283	0.0829405	0.0305446	0.0152223	0.0314942	0.0255968	1.05871	0.872419	0.99334	0.967701	0.929517	0.973876	0.833522	1.03585	0.93346	0.999503	1.00216	0.951465	1.00707	0.941553	0.995874	1.02883	0.986727	0.995725	0.875035	0.375023	0.309833		S	2	___1	0.999517	0.000480559	120.99	86.607	120.99
A8JDQ7	29.2.2	protein.synthesis.ribosome biogenesis	(chl4|512700 : 1401.0) no description available & (gnl|cdd|35834 : 378.0) no description available & (gnl|cdd|47550 : 247.0) no description available & (at3g08730 : 191.0) Encodes a protein-serine kinase that phosphorylates ribosomal protein in vitro. Activation of AtS6k is regulated by 1-naphthylacetic acid and kinetin, at least in part, via a lipid kinase-dependent pathway. Involved in translat…	Cre12.g493250.t1.2	1.24046	1.10579	1.08628	1.1568	1.11262	0.935275	2.20037	4.03877	1.31943	0.0355061	0.0322419	0.0335845	0.0235581	0.0378165	0.0941309	1.27619	1.10163	1.12347	1.20519	1.07582	1.07722	1.24001	1.13991	1.05816	1.1826	1.14478	1.0355	1.13643	1.07096	0.921595	1.15137	1.12212	0.848733	0.548172	0.375445	0.391867		T	2	___1	0.999999	0.000667127	109.28	83.369	109.28
A8J265	35.1.8	not assigned.no ontology.BSD domain-containing protein	(chl4|523555 : 437.0) no description available & (gnl|cdd|37901 : 97.8) no description available & (at1g03350 : 82.8) BSD domain-containing protein; FUNCTIONS IN: molecular_function unknown; INVOLVED IN: biological_process unknown; LOCATED IN: cellular_component unknown; EXPRESSED IN: 24 plant structures; EXPRESSED DURING: 15 growth stages; CONTAINS InterPro DOMAIN/s: BSD (InterPro:IPR005607); BE…	0	1.23795	1.30105	1.32272	1.3538	1.36321	1.44313	1.07009	0.366988	0.0535214	0.258445	0.0283363	0.0290377	0.0274393	0.0354602	0.0735451	0.943085	1.2882	1.29188	1.34561	1.28142	1.34953	1.42517	1.33354	1.32676	1.34355	1.3936	1.37158	1.33296	1.32425	1.51852	1.38488	1.37178	1.4393	0.169329	0.378416	0.385889		S	3	___1	0.996684	1.07968e-25	152.03	123.88	92.38
A8HNG8	35.2	not assigned.unknown	(original description: Uncharacterized lumenal polypeptide OS=Chlamydomonas reinhardtii GN=ULP1 PE=4 SV=1)	Cre01.g051500.t1.2	1.01917	0.879718	0.992079	1.02619	0.926974	0.849758	0.353011	1.33975	0.884111	0.0669071	0.0806978	0.019383	0.0641037	0.117602	0.0880027	0.945214	0.867869	1.00927	1.0755	0.965685	0.971071	1.03678	0.805599	0.995899	1.09671	0.798607	0.884599	1.01042	0.952794	0.915005	0.971448	1.02952	0.749669	0.89173	0.379297	0.80559		S	3	___1	0.967588	0.00117273	78.272	59.553	74.561
A8J7L0	35.2	not assigned.unknown	(original description: Predicted protein OS=Chlamydomonas reinhardtii GN=CHLREDRAFT_192356 PE=4 SV=1)	0	0.934728	0.920215	0.869371	0.873744	0.868332	0.940885	0.283342	0.0479799	1.38396	0.0680202	0.0277592	0.00839835	0.0540766	0.0496483	0.0294391	1.0096	0.923877	0.878576	0.917834	0.890806	0.86741	0.876746	0.945961	0.862127	0.844732	0.910259	0.974877	0.936135	0.881229	0.924119	0.840364	0.813508	0.923658	0.637024	0.380227	0.44289		S	3	___1	0.883774	1.26694e-05	119.65	91.799	101.39
A8IUX7	35.2	not assigned.unknown	(original description: Flagellar associated protein (Fragment) OS=Chlamydomonas reinhardtii GN=FAP98 PE=4 SV=1)	Cre14.g629200.t1.2	1.0733	0.916808	0.909045	0.964983	0.930446	0.892129	0.465249	1.25659	0.381968	0.0906952	0.00998212	0.014518	0.144267	0.0672831	0.0662034	1.17523	0.906283	0.919059	1.04317	0.92614	0.892395	1.00151	0.918002	0.915681	0.799674	0.94618	0.8557	1.06546	0.988468	0.968547	1.02982	0.856691	0.852141	0.243995	0.380406	0.646209		S	2	___1	0.999998	0.000221426	111.7	68.142	94.325
A8HWF0	29.4	protein.postranslational modification	(chl4|523213 : 939.0) no description available & (gnl|cdd|35809 : 291.0) no description available & (gnl|cdd|29142 : 285.0) no description available & (loc_os12g41180.1 : 209.0) no description available & (at1g54510 : 201.0) Encodes AtNEK1, a member of the NIMA-related serine/threonine kinases (Neks) that have been linked to cell-cycle regulation in fungi and mammals. Plant Neks might be involved…	0	0.88364	1.03613	1.04548	0.889131	1.03135	0.992748	0.299471	3.13934	0.213945	0.0239259	0.0303583	0.018052	0.0540112	0.0394863	0.103108	0.891517	1.04496	1.02716	0.902634	1.06109	1.06325	0.856769	1.00233	1.04602	0.946268	1.06474	1.10456	0.882215	0.987765	0.972258	0.838912	1.04153	0.901425	0.49708	0.380542	0.645921		S	2	___2	0.999996	0.000152803	116.96	94.929	84.195
A8J6W6	34.18	transport.unspecified anions	(chl4|517709 : 1579.0) no description available & (gnl|cdd|35695 : 410.0) no description available & (ipr014743 : 257.79422) Chloride channel, core & (at5g26240 : 250.0) member of Anion channel protein family; chloride channel D (CLC-D); CONTAINS InterPro DOMAIN/s: Chloride channel, core (InterPro:IPR014743), Chloride channel, voltage gated (InterPro:IPR001807), Chloride channel ClC-plant (InterP…	0	1.25561	1.13561	1.12259	1.19727	1.19031	1.13898	0.0805738	2.27034	1.02996	0.0839925	0.00782781	0.00949757	0.012378	0.0368106	0.0388823	1.34797	1.14434	1.11174	1.1838	1.13325	1.12941	1.23504	1.12922	1.12662	1.21155	1.16416	1.09707	1.1906	1.17437	1.14599	1.18966	1.23241	1.17388	0.617853	0.380673	0.428183		S	2	___1	1	1.06646e-08	142.1	81.93	120.55
A8J7I0	35.2	not assigned.unknown	(original description: Predicted protein (Fragment) OS=Chlamydomonas reinhardtii GN=CHLREDRAFT_150353 PE=4 SV=1)	0	1.0115	0.839772	0.8347	1.01489	0.825738	0.884492	0.239854	4.24365	0.289713	0.103406	0.0108733	0.022865	0.0115329	0.0168051	0.0461959	1.06631	0.83032	0.844885	0.892232	0.83734	0.850702	1.07597	0.851655	0.808512	1.00437	0.843925	0.841005	1.02722	0.810785	0.932989	1.01308	0.822505	0.879482	0.861391	0.38208	0.947543		S	2	___1	0.866579	0.00207329	76.262	59.222	51.939
A8IKI6	35.2	not assigned.unknown	(original description: Predicted protein OS=Chlamydomonas reinhardtii GN=CHLREDRAFT_188658 PE=4 SV=1)	Cre12.g509700.t1.1	0.965739	0.84534	0.933641	0.928942	0.964829	0.922171	0.606661	0.603885	1.83922	0.0380673	0.0771936	0.00866482	0.0322225	0.0318798	0.0274584	0.988688	0.8035	0.94284	0.986731	0.798099	0.93245	0.921797	0.934421	0.925634	0.915868	0.947224	0.89271	0.965647	1.00163	0.926752	0.905311	0.945634	0.947051	0.910539	0.382363	0.723681		S	2	___1	0.902264	0.00336768	88.637	56.308	88.637
Q65Z16	35.2	not assigned.unknown	(original description: NSG17 protein OS=Chlamydomonas reinhardtii GN=NSG17 PE=2 SV=1)	Cre14.g620850.t1.2	0.952121	1.01799	1.00653	0.996863	0.996174	1.0697	0.605658	0.881918	0.472487	0.0937593	0.0141615	0.0247919	0.0468712	0.010283	0.0562934	0.84581	1.01258	0.978552	0.987546	1.00732	1.02577	1.02301	1.03405	1.01527	0.942758	0.987944	1.00629	1.02508	0.992878	1.1138	1.02275	1.0077	1.089	0.572075	0.382643	0.572118		S	2	___1	0.993452	3.23735e-13	180.41	128.57	92.474
A8IGL4	35.2	not assigned.unknown	#N/A	Cre10.g435350.t2.1	1.14248	1.02635	1.03954	1.13039	1.03882	1.10062	0.888025	4.13203	1.03323	0.0422693	0.0190203	0.00777785	0.00842747	0.0312199	0.0319225	1.16033	1.03503	1.03667	1.09421	1.00454	1.04835	1.17289	1.03948	1.03361	1.12397	1.07389	1.07532	1.13993	1.01407	1.13649	1.12728	1.0285	1.09006	0.773976	0.383001	0.99935		S	2	___1	1	4.12776e-09	180.06	135.81	162.48
A8JI72	35.2	not assigned.unknown	(original description: Predicted protein OS=Chlamydomonas reinhardtii GN=CHLREDRAFT_180508 PE=4 SV=1)	0	0.982351	1.09953	1.06475	0.961252	0.923169	0.876339	2.19246	0.196782	0.717776	0.0732783	0.0268508	0.0421265	0.126245	0.0945684	0.0918769	1.06259	1.13046	1.09332	0.965497	1.08594	1.01637	0.918967	1.0822	1.08457	0.89307	0.884873	0.982378	1.10693	0.853756	0.826184	0.883757	1.03088	0.820456	0.0089393	0.3842	0.231845		T	3	___2	0.991881	0.00930565	48.255	27.032	48.255
A8IFK0	34.1	transport.p- and v-ATPases	(chl4|520740 : 2108.0) no description available & (gnl|cdd|35426 : 536.0) no description available & (gnl|cdd|30822 : 453.0) no description available & (loc_os12g44150.1 : 432.0) no description available & (at3g47950 : 429.0) mutant has Slight reduction in root and shoot growth; Exaggerated defects in salt stress; Plasma Membrane H+ ATPase; H(+)-ATPase 4 (HA4); FUNCTIONS IN: ATPase activity, hydr…	Cre03.g164600.t1.2	0.945756	1.04994	1.05498	0.992357	1.11099	1.13588	2.18601	3.54271	0.11477	0.0264157	0.025346	0.0369972	0.0150383	0.0175385	0.0814868	0.930336	1.0242	1.05309	0.930673	1.05073	1.09288	0.976257	1.07488	1.01896	1.00155	1.10868	1.04368	1.00052	1.09472	1.19823	0.975002	1.12957	1.16575	0.370832	0.384985	0.363148		S	2	___1	1	0.0134689	89.9	59.331	81.017
A8ID17	31.1	cell.organisation	(chl4|509594 : 1533.0) no description available & (gnl|cdd|30094 : 441.0) no description available & (gnl|cdd|39481 : 297.0) no description available & (at5g47820 : 246.0) encodes a kinesin-like protein with an N-terminal microtubule binding motor domain. Protein is localized to the periphery of the cytoplasm and mutants in the gene exhibit altered orientation of cellulose microfibrils and reduce…	0	1.05778	0.965206	0.966609	1.00209	0.999557	0.881638	1.48434	3.54077	1.80014	0.0318685	0.024745	0.0174538	0.032967	0.0383011	0.0366239	1.09407	0.955392	0.954865	1.03435	0.946874	0.986665	1.04492	0.993353	0.958295	1.03774	1.04287	0.923724	0.995809	0.970147	0.857004	0.97271	0.985656	0.864187	0.999971	0.384988	0.275871		S	2	___1	0.999999	6.15587e-15	133.98	103.98	124.4
A8JHG9	35.2	not assigned.unknown	(chl4|520303 : 193.0) no description available & (at1g78915 : 87.4) Tetratricopeptide repeat (TPR)-like superfamily protein; FUNCTIONS IN: binding; INVOLVED IN: biological_process unknown; LOCATED IN: chloroplast thylakoid membrane; CONTAINS InterPro DOMAIN/s: Tetratricopeptide-like helical (InterPro:IPR011990), Tetratricopeptide repeat-containing (InterPro:IPR013026), Tetratricopeptide repeat (I…	0	0.993105	1.16469	1.24518	0.99169	1.19096	1.11378	0.240094	1.3452	0.256672	0.0714996	0.0589203	0.0142669	0.0980618	0.0869803	0.276979	0.931676	1.09706	1.23453	0.976048	1.1921	1.26139	1.07159	1.20491	1.23962	1.04362	1.09555	1.28369	0.878584	1.26585	0.794167	1.05286	1.21146	1.26349	0.664882	0.387046	0.96414		S	2	___1	1	0	376.22	339.88	235.79
A8HYX0	35.2	not assigned.unknown	(original description: Predicted protein (Fragment) OS=Chlamydomonas reinhardtii GN=CHLREDRAFT_187330 PE=4 SV=1)	0	0.879113	0.923425	0.9917	0.858529	0.90633	0.92712	0.499746	0.930028	0.0936809	0.112143	0.0323619	0.0203025	0.0272273	0.038725	0.111471	0.99612	0.945111	0.970186	0.86865	0.938938	1.01052	0.772569	0.886227	0.994391	0.874186	0.899776	1.05283	0.82709	0.947913	0.888224	0.874312	0.8713	0.840307	0.650442	0.391552	0.747336		S	2	___1	0.999159	0.00444097	99.539	56.736	98.182
A8JDG6	27.1.1	RNA.processing.splicing	(chl4|517334 : 129.0) no description available & (loc_os02g54770.2 : 93.6) no description available & (at1g23860 : 89.7) Encodes a 9G8-like serine-arginine rich (SR) protein that interacts in vivo with U1-70K, a U1 small nuclear ribonucleoprotein 70-kDa protein that is involved in nuclear precursor mRNA processing.; RS-containing zinc finger protein 21 (RSZP21); CONTAINS InterPro DOMAIN/s: RNA re…	Cre17.g712000.t1.1	1.21256	1.40196	1.41216	1.3766	1.40675	1.50639	1.10865	1.46626	0.411664	0.22672	0.0198375	0.0114479	0.00678221	0.0275418	0.0558668	0.950794	1.40339	1.42387	1.34007	1.38145	1.41163	1.34681	1.42104	1.40099	1.38003	1.42998	1.44745	1.38098	1.37632	1.55858	1.36879	1.41394	1.51313	0.36276	0.39161	0.427994		S	2	___1	1	0.000198449	161.19	84.263	125.72
A8IS98	35.2	not assigned.unknown	(original description: PRLI-interacting factor L OS=Chlamydomonas reinhardtii GN=LCI15 PE=4 SV=1)	Cre16.g685050.t1.1	0.949818	1.07631	1.0583	1.04097	1.05841	1.0183	0.124712	0.584075	0.55271	0.0692058	0.0211456	0.0513782	0.0335241	0.0316305	0.145939	0.919588	1.0965	1.01384	1.029	1.0781	1.04651	0.900869	1.05432	1.11455	1.02985	1.06717	1.09896	1.07864	1.02332	0.84983	1.01442	1.08474	1.1061	0.370159	0.393437	0.550482		S	2	___2	0.999114	1.11013e-06	111.44	85.089	84.127
A8J3V2	35.2	not assigned.unknown	(original description: Predicted protein OS=Chlamydomonas reinhardtii GN=CHLREDRAFT_174609 PE=4 SV=1)	0	0.945208	1.10223	1.11464	0.93935	1.11984	1.20899	0.574054	3.72955	0.399204	0.0440173	0.0253196	0.0128163	0.129259	0.0230928	0.0700499	0.933619	1.1314	1.10023	0.908145	1.08931	1.12477	0.993861	1.08597	1.11891	0.790095	1.14313	1.14146	1.01455	1.11946	1.28132	1.0134	1.09694	1.2042	0.830929	0.39477	0.593843		S	2	___2	1	1.38397e-42	190.18	157.25	146.67
A8J3V2	35.2	not assigned.unknown	(original description: Predicted protein OS=Chlamydomonas reinhardtii GN=CHLREDRAFT_174609 PE=4 SV=1)	0	0.950001	1.10223	1.11464	0.982895	1.11984	1.20899	1.47076	4.92386	0.529852	0.0428061	0.0253196	0.0128163	0.053839	0.0230928	0.0700499	0.947809	1.1314	1.10023	0.908333	1.08931	1.12477	0.993861	1.08597	1.11891	0.92073	1.14313	1.14146	1.01455	1.11946	1.28132	1.0134	1.09694	1.2042	0.930644	0.394876	0.593843		S	2	___2	0.999038	1.38397e-42	190.18	157.25	158.89
A8JHX9	29.2.4	protein.synthesis.elongation	(chl4|513191 : 1719.0) no description available & (loc_os02g32030.1 : 1386.0) no description available & (at1g56070 : 1374.0) encodes a translation elongation factor 2-like protein that is involved in cold-induced translation. Mutations in this gene specifically blocks low temperature-induced transcription of cold-responsive genes but induces the expression of CBF genes and mutants carrying the r…	Cre12.g516200.t1.2	1.11809	0.989358	1.0541	1.01078	1.08779	1.07574	0.0333598	0.0646016	0.680622	0.0116503	0.148256	0.0384049	0.0320374	0.0617766	0.160886	1.12792	1.12649	1.09816	1.12113	0.832047	1.0277	1.10523	1.00954	1.03644	1.02599	1.13757	0.962859	1.03239	1.01865	1.25996	0.973975	1.10714	1.00439	0.220659	0.395264	0.680102		T	3	___1	0.988774	6.00867e-06	114.87	93.515	55.428
A8I0F0	35.2	not assigned.unknown	(original description: Ring3 protein OS=Chlamydomonas reinhardtii GN=CHLREDRAFT_182576 PE=4 SV=1)	Cre10.g455500.t1.2	0.91841	0.893818	0.925882	0.84753	0.917928	0.902681	0.689299	0.460145	0.904089	0.0468148	0.0378886	0.0270215	0.0388549	0.0430876	0.0208475	0.924695	0.861649	0.903304	0.961765	0.935582	0.918522	0.868771	0.884225	0.955821	0.836732	0.871878	0.878845	0.815217	0.957265	0.917515	0.890642	0.924641	0.911684	0.206842	0.395653	0.842734		S	3	___3	1	0.000473398	96.247	75.419	66.673
A8J4I2	27.1.1	RNA.processing.splicing	(chl4|526257 : 162.0) no description available & (loc_os02g54770.2 : 87.4) no description available & (at2g24590 : 85.9) RNA recognition motif and CCHC-type zinc finger domains containing protein; FUNCTIONS IN: zinc ion binding, nucleotide binding, nucleic acid binding; INVOLVED IN: RNA splicing; LOCATED IN: nucleolus; EXPRESSED IN: 25 plant structures; EXPRESSED DURING: 13 growth stages; CONTAIN…	Cre09.g408200.t1.2	0.933912	1.06498	1.11325	0.909706	0.893458	1.02983	1.50666	1.63415	0.496684	0.0185396	0.024817	0.0167442	0.080427	0.111969	0.137873	0.93363	1.03904	1.09625	0.95259	1.0674	1.11376	0.915514	1.0885	1.12973	0.961241	1.00929	1.11593	0.950846	0.785805	1.10276	0.817031	0.885276	0.870815	0.933678	0.396011	0.0532569		S	2	___2	0.99793	0.00762279	115.33	49.7	111.52
A8ISI1	29.5.11.4.3.2	protein.degradation.ubiquitin.E3.SCF.FBOX	(chl4|516389 : 862.0) no description available & (gnl|cdd|37713 : 162.0) no description available & (gnl|cdd|85281 : 155.0) no description available & (ipr000007 : 113.82092) Tubby, C-terminal & (loc_os03g22800.1 : 110.0) no description available & (at3g06380 : 101.0) Member of TLP family; tubby-like protein 9 (TLP9); CONTAINS InterPro DOMAIN/s: F-box domain, cyclin-like (InterPro:IPR001810), F-b…	Cre16.g667450.t1.2	0.875683	0.856423	0.867246	0.969986	0.91416	0.826072	1.29184	1.94386	1.72463	0.0378688	0.0105645	0.0317864	0.0485591	0.0225338	0.0493022	0.881728	0.86259	0.903359	0.910165	0.862454	0.85487	0.835155	0.844224	0.843509	0.951044	0.896358	0.770169	0.933753	0.906627	0.863341	1.02516	0.939496	0.844707	0.863695	0.397242	0.141311		S	2	___1	0.762297	0.00045344	108.23	67.859	108.23
A8I807	35.2	not assigned.unknown	(original description: Predicted protein OS=Chlamydomonas reinhardtii GN=CHLREDRAFT_186524 PE=4 SV=1)	0	1.12762	1.09615	1.11713	1.08111	0.920246	1.1502	1.40427	2.15154	1.57258	0.00362937	0.0337816	0.0278295	0.0242698	0.131101	0.0208638	1.12585	1.07113	1.10103	1.13179	1.08274	1.14927	1.12521	1.13458	1.1011	1.05339	1.07109	1.12748	1.09143	0.833773	1.15463	1.09852	0.855875	1.16849	0.604873	0.398019	0.451716		S	2	___1	0.805479	0.00423201	87.363	27.613	87.363
A8IS98	35.2	not assigned.unknown	(original description: PRLI-interacting factor L OS=Chlamydomonas reinhardtii GN=LCI15 PE=4 SV=1)	Cre16.g685050.t1.1	0.932021	1.07631	1.0583	1.04097	0.99389	1.02547	0.0192063	0.343999	0.841683	0.0915054	0.0211456	0.0513782	0.0335241	0.0916092	0.133521	0.919867	1.0965	1.01384	1.029	1.0781	1.04651	0.847199	1.05432	1.11455	1.02985	1.06717	1.09896	1.07864	1.02332	0.871346	1.01442	0.891182	1.1061	0.370281	0.39827	0.989312		S	3	___2	0.999672	1.11013e-06	111.44	85.089	89.366
A8JGV1	35.2	not assigned.unknown	(original description: Predicted protein OS=Chlamydomonas reinhardtii GN=CHLREDRAFT_194954 PE=4 SV=1)	0	0.950623	0.986901	1.00373	0.976334	0.973997	0.939295	0.338259	0.0812386	0.528156	0.0911693	0.0175492	0.0174407	0.0514909	0.0384265	0.0245508	0.939451	1.00664	1.01441	1.04686	0.973052	1.01318	0.865555	0.981014	0.983602	0.998801	1	0.959844	1.01277	0.992133	0.945933	0.917427	0.929859	0.912108	0.982948	0.399107	0.580454		S	2	___1	0.881896	3.76878e-14	178.68	146.25	130.72
A8HYP5	35.2	not assigned.unknown	(original description: Intraflagellar transport protein 43 OS=Chlamydomonas reinhardtii GN=IFT43 PE=2 SV=1)	0	0.912937	0.861544	0.96648	0.910759	0.97795	0.91576	0.464739	0.27395	1.66322	0.0394844	0.0285207	0.0183401	0.0655314	0.0702826	0.0216741	0.955077	0.851895	0.950591	0.90694	0.8391	0.986549	0.876794	0.893638	0.962298	0.96903	1.02528	0.898891	0.92343	1.01137	0.940205	0.839817	0.897193	0.908183	0.41445	0.399748	0.434933		S	2	___1	1	0.00456196	123.11	37.821	123.11
A8HQ72	27.1.1	RNA.processing.splicing	(chl4|511153 : 303.0) no description available & (gnl|cdd|35328 : 142.0) no description available & (loc_os07g47630.2 : 116.0) no description available & (at4g02430 : 105.0) RNA-binding (RRM/RBD/RNP motifs) family protein; FUNCTIONS IN: RNA binding, nucleotide binding, nucleic acid binding; INVOLVED IN: biological_process unknown; LOCATED IN: cellular_component unknown; EXPRESSED IN: 23 plant str…	Cre01.g026450.t1.2	0.913199	1.01103	1.03065	0.857193	0.908335	0.903495	1.15038	0.469455	0.0806686	0.017848	0.113446	0.135238	0.00719928	0.143202	0.101506	0.898743	0.890046	1.10221	0.933148	1.02801	1.11508	0.907705	1.11502	0.874668	0.865063	0.835519	1.00133	0.855575	1.07331	0.910474	0.85094	0.816173	0.79868	0.5047	0.399781	0.13421		S	3	___1	0.967272	0.00239325	76.015	58.271	64.761
A8IV13	35.2	not assigned.unknown	(chl4|515553 : 687.0) no description available & (gnl|cdd|37244 : 166.0) no description available & (at5g16300 : 141.0) Vps51/Vps67 family (components of vesicular transport) protein; FUNCTIONS IN: molecular_function unknown; INVOLVED IN: biological_process unknown; LOCATED IN: cellular_component unknown; EXPRESSED IN: 23 plant structures; EXPRESSED DURING: 13 growth stages; CONTAINS InterPro DOM…	0	1.10286	1.06946	1.06067	1.10905	1.07611	1.09167	0.568448	0.992135	0.176564	0.0225103	0.0215113	0.017285	0.00870603	0.0223176	0.0497117	1.11698	1.06348	1.07131	1.11471	1.05157	1.04072	1.0769	1.09333	1.06997	1.11259	1.08607	1.09275	1.11542	1.05055	1.14084	1.09913	1.09172	1.04143	0.514237	0.400787	0.898348		S	2	___1	1	7.80935e-31	180.13	146.69	115.58
A8ISN0	35.2	not assigned.unknown	(original description: RWP-RK transcription factor OS=Chlamydomonas reinhardtii GN=RWP8 PE=4 SV=1)	0	1.03251	0.974546	1.05839	1.04509	1.00596	0.930958	0.313073	0.264486	0.641522	0.019217	0.116835	0.0144174	0.0189054	0.0703243	0.144716	1.04068	0.839851	1.07039	1.04629	1.03531	1.0424	1.01056	1.04847	1.06238	1.03905	0.926713	0.881451	1.02995	1.06092	0.817492	1.06628	1.03025	1.09393	0.709019	0.401028	0.39321		S	2	___1	0.999995	1.75799e-53	219.97	195.45	219.97
A8J431	35.2	not assigned.unknown	(original description: Chlorophyll a-b binding protein, chloroplastic OS=Chlamydomonas reinhardtii GN=LHCSR3 PE=3 SV=1)	#N/A	1.28735	1.18353	1.06881	1.17885	1.22748	1.10696	0.0442398	0.609256	0.206925	0.0770539	0.0089163	0.217777	0.0429937	0.0771679	0.272445	1.34262	1.18036	1.18482	1.19933	1.1936	0.817585	1.32011	1.17663	1.20402	1.16522	1.31632	1.27171	1.14432	1.17713	1.25668	1.227	1.18899	0.792485	0.838533	0.401341	0.323146		T	3	___1	0.887315	1.54288e-63	213.57	170.19	44.878
A8IAC7	29.2.3	protein.synthesis.initiation	(chl4|518507 : 1165.0) no description available & (gnl|cdd|36359 : 658.0) no description available & (loc_os05g51500.1 : 658.0) no description available & (at1g76810 : 655.0) eukaryotic translation initiation factor 2 (eIF-2) family protein; FUNCTIONS IN: translation factor activity, nucleic acid binding, GTP binding, GTPase activity; LOCATED IN: plasma membrane; EXPRESSED IN: 25 plant structures…	0	1.29292	1.28766	1.33411	1.28549	1.27273	1.18235	0.443584	0.0392068	0.244989	0.0259185	0.0320645	0.0160125	0.04747	0.0216187	0.309491	1.28246	1.28213	1.33639	1.32243	1.25872	1.34886	1.27387	1.32213	1.31708	1.25395	1.25243	1.35218	1.34008	1.29547	0.825119	1.26243	1.2703	1.36974	0.725998	0.40159	0.929913		S	3	___1	1	2.88571e-30	133.53	118.24	126.16
A8JCM3	27.1.2	RNA.processing.RNA helicase	(chl4|524648 : 1182.0) no description available & (gnl|cdd|35562 : 759.0) no description available & (at5g51280 : 675.0) DEAD-box protein abstrakt, putative; FUNCTIONS IN: helicase activity, zinc ion binding, ATP-dependent helicase activity, nucleic acid binding, ATP binding; LOCATED IN: cellular_component unknown; EXPRESSED IN: 22 plant structures; EXPRESSED DURING: 13 growth stages; CONTAINS In…	0	0.950601	1.02752	1.00161	0.930766	0.945126	1.03092	0.50806	1.24304	0.744395	0.00509391	0.0312084	0.0103635	0.0761423	0.0795276	0.0314602	0.945993	1.03479	0.996776	0.95607	0.993316	0.994544	0.949739	1.05445	1.01351	0.981623	0.979862	0.995026	0.967448	1.00138	1.0537	0.843226	0.85414	1.04404	0.801838	0.403693	0.269801		S	2	___1	1	1.30192e-05	142.19	103.61	96.247
A8IKR5	35.2	not assigned.unknown	(original description: Predicted protein OS=Chlamydomonas reinhardtii GN=CHLREDRAFT_144655 PE=4 SV=1)	0	1.12478	1.03416	1.00641	1.08526	1.03367	1.09446	0.400336	1.70263	1.39992	0.0569248	0.0329283	0.0294854	0.0557247	0.0245004	0.0105517	1.19051	1.07022	0.995793	1.09176	1.0057	0.9837	1.09208	1.02654	1.03973	1.02327	1.05066	1.0976	1.10132	1.00559	1.10309	1.1312	1.04477	1.0827	0.665163	0.404209	0.355467		S	2	___1	1	2.45567e-32	197.51	169.86	153.92
A8JH61	35.2	not assigned.unknown	(original description: Predicted protein (Fragment) OS=Chlamydomonas reinhardtii GN=CHLREDRAFT_154334 PE=4 SV=1)	0	0.905509	0.96849	0.88934	0.862083	0.928219	0.874363	0.863951	1.45545	0.0814549	0.0226763	0.0174372	0.0596313	0.0464252	0.059681	0.0373653	0.929719	0.986792	0.870701	0.902042	0.966608	0.956065	0.884765	0.95207	0.841255	0.914069	0.85944	0.849715	0.82476	0.95887	0.917355	0.847421	0.966346	0.856019	0.23408	0.405499	0.958549		S	2	___1	0.999994	0.000141792	114.56	62.622	114.56
A8JFK8	35.2	not assigned.unknown	(original description: Hypothetical zinc finger protein OS=Chlamydomonas reinhardtii GN=CHLREDRAFT_194555 PE=4 SV=1)	0	0.965719	0.939577	0.904918	0.996738	0.923685	0.946679	0.271461	0.547154	0.149829	0.051154	0.00395361	0.0627119	0.0601773	0.107215	0.0462838	0.951094	0.943273	0.848646	0.923471	0.935408	0.893585	1.02259	0.940051	0.972524	0.981632	0.799911	0.991002	0.945553	0.9878	0.898656	1.06303	0.983344	0.950379	0.89551	0.406239	0.644155		S	2	___1	0.97151	3.24343e-06	125.45	92.411	125.45
A8J3W1	35.2	not assigned.unknown	(original description: Predicted protein OS=Chlamydomonas reinhardtii GN=CHLREDRAFT_184434 PE=4 SV=1)	Cre16.g680700.t1.2	1.00292	1.13447	1.17968	1.07767	1.20092	1.34593	2.21422	3.55132	0.428765	0.101524	0.0237113	0.00351699	0.0621081	0.0703272	0.0777076	1.029	1.14631	1.17985	0.890897	1.14993	1.18311	1.08885	1.10717	1.17608	1.1432	1.27094	1.26072	1.07014	1.13029	1.41287	1.01967	1.20152	1.36422	0.157682	0.40741	0.527943		S	2	___1	1	1.69675e-09	160.56	121.75	128.36
A8IZM6	26.7	misc.oxidases - copper, flavone etc	(chl4|525858 : 853.0) no description available & (gnl|cdd|35252 : 200.0) no description available & (gnl|cdd|85554 : 163.0) no description available & (ipr002937 : 92.26592) Amine oxidase & (loc_os08g04780.1 : 89.7) no description available & (at1g62830 : 87.8) Encodes a homolog of human Lysine-Specific Demethylase1. Involved in H3K4 methylation of target genes including the flowering time loci F…	0	1.24143	1.14091	1.09306	1.01028	1.07032	1.04409	1.67179	0.239197	0.647657	0.0333441	0.0827745	0.0458653	0.0444403	0.100158	0.174887	1.27333	1.20766	1.07649	1.20681	1.04829	1.14491	1.24415	1.16677	1.05778	0.99978	1.18382	1.12815	1.05903	0.994335	1.16107	0.972035	1.03279	0.843043	0.360985	0.407838	0.0563813		T	2	___1	1	0.00220426	104.07	44.051	104.07
A8J1B8	29.4	protein.postranslational modification	(chl4|525803 : 527.0) no description available & (at2g37550 : 222.0) A member of ARF GAP domain (AGD), A thaliana has 15 members, grouped into four classes.; ARF-GAP domain 7 (AGD7); FUNCTIONS IN: ARF GTPase activator activity, DNA binding, zinc ion binding; INVOLVED IN: regulation of ARF GTPase activity; LOCATED IN: cytosol, nucleus; EXPRESSED IN: 25 plant structures; EXPRESSED DURING: 15 growth…	Cre09.g386550.t1.2	1.02361	1.0521	0.893687	0.808518	0.850861	1.06215	0.742243	0.159756	1.49781	0.112516	0.00779656	0.187272	0.0444769	0.0414387	0.19978	0.896792	1.06097	0.78876	1.06259	1.04902	1.1099	1.11146	1.04632	0.782401	0.840959	0.881431	1.10742	0.757817	0.803697	1.23541	0.826777	0.867454	0.843619	0.820509	0.407988	0.256097		S	2	___1	0.954798	0.00129358	125.23	71.874	107.09
A8I9T2	31.1	cell.organisation	(chl4|518407 : 1280.0) no description available & (p46870|klp1_chlre : 1278.0) Kinesin-like protein KLP1 - Chlamydomonas reinhardtii & (gnl|cdd|30097 : 494.0) no description available & (gnl|cdd|39481 : 319.0) no description available & (ipr001752 : 252.4959) Kinesin, motor domain & (at1g59540 : 210.0) Encodes a kinesin-like protein.; ZCF125; FUNCTIONS IN: microtubule motor activity, ATP binding;…	Cre02.g073750.t1.2	1.05872	1.0086	0.981063	1.05694	1.00173	1.03669	0.663807	2.20504	0.9928	0.0359979	0.0207675	0.00920624	0.0231047	0.0207589	0.0334533	1.08688	1.03257	0.974401	1.07113	0.996202	0.977219	1.01816	0.997021	0.991568	1.03244	1.02153	0.999507	1.07834	1.00354	1.06435	1.06004	0.980128	1.0462	0.711563	0.408344	0.364353		S	2	___1	0.999998	4.10874e-06	159.41	127.64	150.12
Q65Z16	35.2	not assigned.unknown	(original description: NSG17 protein OS=Chlamydomonas reinhardtii GN=NSG17 PE=2 SV=1)	Cre14.g620850.t1.2	0.86426	0.99191	0.995161	0.941657	0.989508	1.0232	1.31701	3.56971	0.819345	0.0570873	0.00367922	0.0151544	0.0284298	0.0235941	0.041435	0.869429	0.987791	0.97798	0.918587	0.994873	1.00088	0.804764	0.993065	1.00663	0.935255	0.969316	0.993163	0.972742	0.983765	1.07047	0.916974	1.01544	1.00596	0.641708	0.408483	0.570389		S	2	___2	0.993452	3.23735e-13	180.41	128.57	92.474
Q9FED4	35.2	not assigned.unknown	(original description: CCM1-A OS=Chlamydomonas reinhardtii GN=CCM1 PE=2 SV=1)	Cre02.g096300.t1.1	1.0992	1.12335	1.13115	1.10585	1.09936	1.1803	0.244818	1.14334	0.536501	0.0441581	0.0296491	0.00473875	0.0253836	0.04336	0.0589791	1.13976	1.14772	1.13186	1.10568	1.09034	1.13549	1.05216	1.13199	1.12609	1.07665	1.14411	1.12049	1.12268	1.09641	1.23841	1.11822	1.05754	1.18201	0.268755	0.409074	0.737956		S	2	___1	0.99995	2.06275e-26	191.36	165.35	190.24
Q65Z16	35.2	not assigned.unknown	(original description: NSG17 protein OS=Chlamydomonas reinhardtii GN=NSG17 PE=2 SV=1)	Cre14.g620850.t1.2	0.894715	0.88221	0.935133	0.841275	0.917211	0.886611	0.455005	0.492563	0.601602	0.0602495	0.0416897	0.0646978	0.0341193	0.0493445	0.0334036	0.958636	0.869082	0.900225	0.886536	0.928883	0.895388	0.838972	0.848665	1.00979	0.802716	0.919047	0.855956	0.853551	0.866975	0.922212	0.867557	0.965613	0.881665	0.305538	0.409454	0.931354		S	2	___3	0.996466	1.0429e-18	183.18	138.25	92.474
A8J431	35.2	not assigned.unknown	(original description: Chlorophyll a-b binding protein, chloroplastic OS=Chlamydomonas reinhardtii GN=LHCSR3 PE=3 SV=1)	#N/A	1.28735	1.18353	1.08972	1.17885	1.22748	1.12836	0.0502881	0.579548	0.271664	0.0770539	0.0089163	0.181606	0.0429937	0.0771679	0.235396	1.34262	1.18036	1.18482	1.19933	1.1936	0.880309	1.32011	1.17663	1.20402	1.16522	1.31632	1.27171	1.14432	1.17713	1.25668	1.227	1.18899	0.856684	0.838533	0.409956	0.319259		T	3	___1	0.988201	1.54288e-63	213.57	170.19	63.979
A8IBM7	35.2	not assigned.unknown	(original description: Predicted protein OS=Chlamydomonas reinhardtii GN=CHLREDRAFT_93305 PE=4 SV=1)	0	0.963724	0.839967	1.04951	1.05306	0.905962	1.01108	0.39867	1.54852	0.316957	0.146538	0.0195834	0.0184954	0.00891014	0.131331	0.118964	0.863864	0.862532	1.05801	0.895357	0.829966	1.02829	1.13195	0.827404	1.06222	1.06051	0.807064	1.06955	1.05547	1.05497	0.87419	1.04319	0.855851	1.08948	0.661336	0.410842	0.929242		S	3	___3	0.886085	0.00950446	42.712	22.472	42.712
A2T2X4	35.2	not assigned.unknown	(original description: Intraflagellar transport protein 46 OS=Chlamydomonas reinhardtii GN=IFT46 PE=1 SV=1)	0	1.13353	1.08593	1.10216	1.11604	1.09955	1.17823	0.61471	0.761387	0.74042	0.0635954	0.0200005	0.0317766	0.00870252	0.0417088	0.0556141	1.20477	1.10797	1.11825	1.11333	1.06893	1.12268	1.08248	1.0809	1.06556	1.11747	1.14742	1.12789	1.12394	1.08016	1.23793	1.10671	1.07106	1.16887	0.710329	0.411268	0.248653		S	2	___1	0.999953	2.94237e-08	140.78	94.074	140.78
A8JA64	35.2	not assigned.unknown	(original description: Predicted protein OS=Chlamydomonas reinhardtii GN=CHLREDRAFT_193345 PE=4 SV=1)	0	0.996288	1.03535	0.953318	0.971209	0.936774	0.906347	0.566333	0.230351	0.0833405	0.20989	0.0361883	0.0614426	0.0648458	0.08409	0.0728069	1.2338	1.06582	1.01153	0.91932	0.995349	0.959342	0.835747	1.04486	0.889085	1.01806	0.840039	0.86745	0.897199	0.992407	0.86125	0.998371	0.977878	0.990341	0.08782	0.411994	0.356443		S	3	___1	1	1.13444e-11	74.146	48.328	66.419
A8HYU5	13.1.3.4	amino acid metabolism.synthesis.aspartate family.methionine	(chl4|522823 : 768.0) no description available & (gnl|cdd|36719 : 654.0) no description available & (q96553|metm_catro : 641.0) S-adenosylmethionine synthetase 3 (EC 2.5.1.6) (Methionine adenosyltransferase 3) (AdoMet synthetase 3) - Catharanthus roseus (Rosy periwinkle) (Madagascar periwinkle) & (at2g36880 : 639.0) methionine adenosyltransferase 3 (MAT3); FUNCTIONS IN: methionine adenosyltransfe…	0	1.4039	1.29258	1.18601	1.32428	1.18745	0.982025	1.95031	3.13851	0.313604	0.030016	0.04578	0.00856926	0.0541149	0.071099	0.198885	1.37153	1.34241	1.1871	1.40933	1.25237	1.19398	1.43082	1.28298	1.17695	1.30561	1.26831	1.19712	1.38525	1.13471	0.944174	1.28197	1.15934	0.804786	0.54438	0.413015	0.252637		T	3	___1	1	3.57266e-147	256.66	213.06	114.75
A8HQM6	35.2	not assigned.unknown	(chl4|511272 : 364.0) no description available & (gnl|cdd|38023 : 141.0) no description available & (gnl|cdd|69563 : 138.0) no description available & (at4g02720 : 118.0) unknown protein; FUNCTIONS IN: molecular_function unknown; INVOLVED IN: biological_process unknown; EXPRESSED IN: 25 plant structures; EXPRESSED DURING: 14 growth stages; CONTAINS InterPro DOMAIN/s: Protein of unknown function D…	0	0.98094	0.931656	0.954653	0.939868	0.897867	0.936777	0.758654	0.608956	0.0440798	0.0463725	0.0483361	0.0279519	0.048926	0.0465417	0.0504413	0.934128	0.896687	0.964172	0.981831	0.911466	0.976602	1.02686	0.986813	0.923185	0.885139	0.851313	0.992691	0.979369	0.897893	0.894695	0.955096	0.944396	0.922944	0.664028	0.413114	0.294339		S	3	___1	1	3.73023e-43	206.92	181.91	70.094
A8ISX0	35.2	not assigned.unknown	(original description: Predicted protein OS=Chlamydomonas reinhardtii GN=CHLREDRAFT_183397 PE=4 SV=1)	Cre04.g221850.t1.2	1.09921	1.00146	1.07998	1.00435	1.12453	0.939304	0.301912	0.153839	0.842145	0.0836058	0.126866	0.0138107	0.165608	0.0426691	0.159857	1.12837	1.05968	1.08505	1.00493	1.08877	1.06435	1.16432	0.855938	1.09054	0.83673	1.10643	1.12388	1.00844	1.0939	0.845112	1.16787	1.17327	0.848922	0.510036	0.414128	0.861371		T	3	___1	0.999978	1.33638e-07	112.44	90.395	112.44
A8ITL3	35.2	not assigned.unknown	(original description: Fibrocystin-like protein (Fragment) OS=Chlamydomonas reinhardtii GN=CHLREDRAFT_171165 PE=4 SV=1)	0	1.29687	1.17427	1.12023	1.23323	1.18214	0.956635	1.27671	3.26848	0.792436	0.057367	0.0209858	0.00564858	0.03466	0.0233466	0.160609	1.35482	1.1984	1.12228	1.24011	1.16026	1.12457	1.29568	1.16415	1.11384	1.24446	1.19903	1.12449	1.19435	1.1555	0.940989	1.26088	1.19189	0.804422	0.665283	0.414871	0.525989		S	2	___1	1	6.3919e-09	161.25	119.43	135.02
A8IKJ4	35.2	not assigned.unknown	(original description: Multi-eye protein OS=Chlamydomonas reinhardtii GN=MLT1 PE=4 SV=1)	0	0.8858	1.05224	1.09315	1.05889	1.0706	1.12049	4.51559	5.78128	3.80219	0.0116544	0.0340838	0.0237774	0.00622607	0.0275649	0.0276591	0.875209	1.01472	1.10337	0.898286	1.06068	1.11011	0.883904	1.08131	1.06597	1.0517	1.05644	1.09069	1.06254	1.05298	1.14534	1.06242	1.10236	1.12546	0.36774	0.415087	0.260986		S	2	___1	1	0.00455488	119.22	43.002	101.97
A8IP17	29.2.3	protein.synthesis.initiation	(chl4|523861 : 836.0) no description available & (q40465|if411_tobac : 712.0) Eukaryotic initiation factor 4A-11 (EC 3.6.1.-) (ATP-dependent RNA helicase eIF4A-11) (eIF-4A-11) - Nicotiana tabacum (Common tobacco) & (loc_os02g05330.1 : 710.0) no description available & (at3g13920 : 701.0) eukaryotic translation initiation factor 4A-1; eukaryotic translation initiation factor 4A1 (EIF4A1); CONTAINS…	0	0.912719	0.983782	1.06887	0.828165	0.970632	0.956399	0.853518	1.25577	0.186335	0.0711485	0.107748	0.0219916	0.0969137	0.130187	0.0979427	0.834106	0.86269	1.08628	0.972691	1.01959	1.07617	0.93136	1.06907	1.04415	0.895441	0.968716	1.06267	0.871973	1.10177	0.869765	0.717083	0.841414	0.936759	0.634482	0.415239	0.074667		T	2	___1	0.975795	1.03075e-05	127.17	79.872	96.745
A8IUV6	35.2	not assigned.unknown	(original description: Predicted protein OS=Chlamydomonas reinhardtii GN=CHLREDRAFT_173001 PE=4 SV=1)	0	0.918157	1.15844	1.19722	0.856251	1.2336	0.987111	0.580545	2.64546	0.806371	0.124142	0.0474389	0.0476271	0.0430583	0.094553	0.231212	1.06101	1.20525	1.14596	0.857063	1.15968	1.20562	0.836401	1.1104	1.2401	0.90565	1.31947	1.25402	0.836427	1.13227	0.859023	0.826675	1.24904	0.84829	0.876844	0.415277	0.65482		Y	2	___2	0.999973	0.0228749	46.746	19.717	46.746
A8J6S7	29.5.11.20	protein.degradation.ubiquitin.proteasom	(chl4|517679 : 1466.0) no description available & (gnl|cdd|37273 : 1033.0) no description available & (loc_os08g12820.1 : 821.0) no description available & (at1g04810 : 805.0) 26S proteasome regulatory complex, non-ATPase subcomplex, Rpn2/Psmd1 subunit; FUNCTIONS IN: enzyme regulator activity, binding; INVOLVED IN: protein catabolic process, ubiquitin-dependent protein catabolic process; LOCATED …	0	0.898424	0.991519	0.901229	0.876115	1.09303	1.08663	0.963185	1.12359	0.547784	0.0573166	0.118749	0.149309	0.0505706	0.0322816	0.163483	0.948921	0.854877	1.07296	0.910227	1.04994	0.828596	0.836125	1.06974	0.802134	0.934157	1.12943	0.899915	0.84155	1.08177	1.20408	0.852639	1.06788	1.15589	0.776899	0.416068	0.37542		S	2	___1	0.989264	2.45567e-32	197.51	167.89	197.51
Q39576	35.2	not assigned.unknown	(original description: Histone H1 OS=Chlamydomonas reinhardtii GN=ch1 PE=3 SV=1)	Cre06.g275900.t1.2	1.14913	1.16311	1.22177	1.14697	1.20007	1.35602	1.94871	3.85368	1.49093	0.0250162	0.0183154	0.0269738	0.0147486	0.0281147	0.0829961	1.17763	1.1836	1.19369	1.13083	1.14833	1.22412	1.13892	1.1574	1.24749	1.16355	1.23248	1.26708	1.14206	1.18562	1.43141	1.13531	1.18213	1.36957	0.306475	0.417962	0.578473		S	2	___1	1	4.54965e-05	150.59	118.38	73.168
A8JI54	35.2	not assigned.unknown	(original description: Predicted protein (Fragment) OS=Chlamydomonas reinhardtii GN=CHLREDRAFT_195187 PE=4 SV=1)	0	1.07372	1.06568	0.931171	1.14685	1.02511	1.19116	0.898249	0.181686	0.806944	0.113356	0.182545	0.179724	0.03651	0.122566	0.0182911	0.944204	1.15903	1.13633	1.15486	0.855336	0.855695	1.1221	1.18267	0.801494	1.11657	1.09904	1.18711	1.18739	0.883634	1.17522	1.13658	1.09267	1.21113	0.499119	0.418676	0.417169		T	2	___2	1	0.0131717	68.657	17.371	68.657
A8J8B4	35.2	not assigned.unknown	(original description: Predicted protein OS=Chlamydomonas reinhardtii GN=CHLREDRAFT_192759 PE=4 SV=1)	0	1.03342	0.945364	0.960808	0.973456	0.946702	1.00001	0.126335	1.02149	0.80132	0.0577664	0.0746117	0.000755207	0.0380816	0.00729872	0.00495858	1.10001	1.00218	0.961145	1.00339	0.860869	0.959943	0.996848	0.973042	0.961336	0.93074	0.954627	0.995059	1.00385	0.945222	1	0.985776	0.940256	1.00498	0.249246	0.41883	0.997552		S	2	___1	0.822308	0.000824859	109.48	82.724	109.48
A8JGN2	35.2	not assigned.unknown	(original description: Thioredoxin-like protein OS=Chlamydomonas reinhardtii GN=CHLREDRAFT_194687 PE=4 SV=1)	Cre12.g496700.t1.2	1.26833	1.05302	1.19098	1.22153	1.21834	1.28879	1.05623	1.16066	0.937854	0.0656269	0.183109	0.0338782	0.00456368	0.0266211	0.0308944	1.34383	1.16544	1.16065	1.23621	1.15189	1.22754	1.22495	0.841724	1.18475	1.22675	1.24885	1.25791	1.21951	1.19982	1.3197	1.21832	1.20635	1.28876	0.745675	0.419639	0.283045		T	2	___1	1	6.26104e-120	205.98	151.51	140.68
A8IYS5	35.2	not assigned.unknown	(original description: Septin-like protein OS=Chlamydomonas reinhardtii GN=SEP1 PE=1 SV=1)	Cre12.g556250.t1.2	0.972978	0.967716	1.19831	1.20562	1.21919	1.25719	2.46104	1.14888	0.585038	0.189594	0.163503	0.0150959	0.0371705	0.0380905	0.0378975	0.861341	0.869686	1.21102	1.19189	1.15647	1.18162	0.865704	0.876997	1.20228	1.24532	1.24231	1.23426	1.17164	1.17522	1.30093	1.19989	1.24003	1.23638	0.0870957	0.420581	0.0932555		S	2	___1	0.993311	0.000125498	122.66	73.473	92.856
A8IBF4	35.1.5	not assigned.no ontology.pentatricopeptide (PPR) repeat-containing protein	(chl4|509833 : 196.0) no description available & (gnl|cdd|39435 : 85.9) no description available & (at1g62390 : 83.2) Octicosapeptide/Phox/Bem1p (PB1) domain-containing protein / tetratricopeptide repeat (TPR)-containing protein; FUNCTIONS IN: binding; EXPRESSED IN: 25 plant structures; EXPRESSED DURING: 14 growth stages; CONTAINS InterPro DOMAIN/s: Octicosapeptide/Phox/Bem1p (InterPro:IPR000270)…	0	1.26044	1.16928	1.08478	1.23076	1.14866	1.03599	0.241749	1.20349	0.00918919	0.0298599	0.0308261	0.189516	0.032841	0.0178585	0.220516	1.29222	1.16337	0.865944	1.23297	1.14184	1.19501	1.25613	1.20263	1.19337	1.25588	1.12805	1.17067	1.24281	1.15846	0.781504	1.1936	1.15947	1.15579	0.586966	0.421691	0.106101		S	3	___1	0.99378	1.79977e-13	156.08	122.41	156.08
A8J6D1	1.1.1.1	PS.lightreaction.photosystem II.LHC-II	(chl4|517514 : 491.0) no description available & (q93wd2|cb29_chlre : 489.0) Chlorophyll a-b binding protein CP29 - Chlamydomonas reinhardtii & (at2g40100 : 247.0) Lhcb4:3 protein (Lhcb4.3, light harvesting complex of photosystem II; light harvesting complex photosystem II (LHCB4.3); CONTAINS InterPro DOMAIN/s: Chlorophyll A-B binding protein (InterPro:IPR001344); BEST Arabidopsis thaliana protei…	Cre17.g720250.t1.2	0.89642	0.956186	0.97714	0.855484	1.06726	1.07172	1.05607	2.6106	0.95474	0.0356323	0.0976713	0.0120621	0.0451919	0.0549815	0.0869652	0.937163	1.02424	0.965057	0.871085	0.844273	0.977181	0.881011	1.00005	0.989181	0.866034	1.12734	1.02083	0.80595	1.01946	1.17214	0.894467	1.05498	1.02219	0.733451	0.421697	0.614509		T	2	___2	0.999985	2.97405e-31	200.73	163.48	126.5
A8J6D1	1.1.1.1	PS.lightreaction.photosystem II.LHC-II	(chl4|517514 : 491.0) no description available & (q93wd2|cb29_chlre : 489.0) Chlorophyll a-b binding protein CP29 - Chlamydomonas reinhardtii & (at2g40100 : 247.0) Lhcb4:3 protein (Lhcb4.3, light harvesting complex of photosystem II; light harvesting complex photosystem II (LHCB4.3); CONTAINS InterPro DOMAIN/s: Chlorophyll A-B binding protein (InterPro:IPR001344); BEST Arabidopsis thaliana protei…	Cre17.g720250.t1.2	0.88857	0.956186	0.97714	0.855484	0.970107	1.07172	0.309981	1.87018	0.444609	0.0222503	0.0976713	0.0120621	0.0451919	0.117593	0.0869652	0.913615	1.02424	0.965057	0.871085	0.844273	0.977181	0.881011	1.00005	0.989181	0.866034	0.83588	1.02083	0.80595	1.01946	1.17214	0.894467	1.05498	1.02219	0.411744	0.421697	0.614509		T	2	___2	0.999967	0.00177851	111.81	77.602	83.877
A8JAQ5	35.2	not assigned.unknown	(original description: Flagellar associated protein OS=Chlamydomonas reinhardtii GN=ANK17 PE=4 SV=1)	0	0.966271	1.07261	1.07297	0.993683	1.07317	1.13277	0.870449	3.43793	0.357014	0.0759817	0.00471101	0.00450671	0.0423229	0.0168515	0.0331085	0.972208	1.07756	1.07297	1.03911	1.06818	1.07747	0.887496	1.07208	1.06846	0.996696	1.05749	1.0992	1.03442	1.09099	1.1654	0.949935	1.07103	1.1337	0.833243	0.422998	0.63134		S	2	___2	0.999979	1.72508e-23	186.98	165.04	146.67
A8J8D7	35.2	not assigned.unknown	(original description: Predicted protein (Fragment) OS=Chlamydomonas reinhardtii GN=CHLREDRAFT_192775 PE=4 SV=1)	0	0.901325	1.01245	0.964899	0.977096	0.945861	0.957949	0.00662133	0.152969	0.459506	0.0272439	0.019335	0.0958185	0.0868909	0.116016	0.0919178	0.931865	1.03354	0.856981	0.892589	1.00826	0.997727	0.879521	0.99556	1.03999	1.04415	0.81209	1.01867	0.878933	1.00653	0.852199	1.0082	1.01896	1.00298	0.854498	0.423691	0.469575		Y	3	___3	0.987131	0.0245458	42.647	26.633	42.647
Q84X77	35.2	not assigned.unknown	(original description: CR027 protein OS=Chlamydomonas reinhardtii GN=CHLREDRAFT_135133 PE=4 SV=1)	Cre03.g170800.t1.2	0.914074	0.926779	1.02922	0.876288	0.926815	0.910933	0.98464	0.801787	0.5451	0.042587	0.0459794	0.0343659	0.0390047	0.106325	0.0748776	0.93693	0.881216	1.05567	0.940354	0.925956	1.04161	0.864939	0.973164	0.990374	0.888204	0.813371	0.997366	0.832715	1.02419	0.865793	0.907944	0.942883	0.86964	0.47583	0.423902	0.464731		S	2	___1	0.999392	0.0105407	76.151	41.876	76.151
A8I2H9	18	Co-factor and vitamine metabolism	(chl4|518874 : 391.0) no description available & (loc_os03g02450.2 : 133.0) no description available & (gnl|cdd|34736 : 123.0) no description available & (at2g46580 : 120.0) Pyridoxamine 5-phosphate oxidase family protein; FUNCTIONS IN: FMN binding, pyridoxamine-phosphate oxidase activity; INVOLVED IN: oxidation reduction, pyridoxine biosynthetic process; LOCATED IN: cellular_component unknown; E…	0	1.01766	0.855745	0.847021	0.957244	0.907005	0.912482	0.26581	1.73435	0.673615	0.050817	0.0325541	0.0359043	0.130552	0.0315198	0.0346558	1.05932	0.845705	0.887603	0.961044	0.829394	0.819386	1.03263	0.892137	0.834073	0.806865	0.943399	0.939484	1.0233	0.889071	0.873404	1.04156	0.888543	0.924559	0.687612	0.423925	0.691669		S	2	___1	0.992872	0.000289264	112.67	86.008	75.463
A8HQV0	35.2	not assigned.unknown	(original description: Predicted protein (Fragment) OS=Chlamydomonas reinhardtii GN=CHLREDRAFT_146601 PE=4 SV=1)	0	0.933901	0.833566	0.85113	0.855756	1.07971	0.843495	3.05348	4.44191	6.45085	0.0213763	0.00424094	0.053726	0.01026	0.0139234	0.018621	0.958527	0.830787	0.909509	0.92304	0.838447	0.840116	0.920136	0.831464	0.803764	0.843926	1.0679	0.836524	0.861118	1.09506	0.864595	0.862224	1.07617	0.829365	0.854706	0.424812	0.451551		S	2	___1	0.925283	3.188e-06	171.15	141.17	138.98
A8HQH5	29.5.11.5	protein.degradation.ubiquitin.ubiquitin protease	(chl4|511236 : 1802.0) no description available & (gnl|cdd|73074 : 279.0) no description available & (at3g49600 : 243.0) Encodes a ubiquitin-specific protease which catalyzes deubiquitination of histone H2B and is required for heterochromatin silencing.Loss of function mutations display autonomous endosperm development and embryo arrest. Loss of function also results in an increase in expression …	0	0.951625	0.996246	0.971364	0.927341	0.920755	1.02833	0.248311	0.8107	0.927175	0.0708681	0.0139263	0.0282371	0.0672648	0.0707596	0.0107407	0.996269	1.00048	0.941032	0.988695	0.980693	0.976169	0.86991	1.00756	0.99689	0.937486	0.94898	1.01743	0.988956	0.973047	1.02866	0.855579	0.840239	1.03891	0.737698	0.424855	0.581149		T	2	___1	0.81885	0.00127187	104.2	45.949	104.2
A8HRL3	29.4	protein.postranslational modification	(chl4|514224 : 1210.0) no description available & (gnl|cdd|35413 : 161.0) no description available & (gnl|cdd|29142 : 142.0) no description available & (at1g62400 : 111.0) high leaf temperature 1 (HT1); CONTAINS InterPro DOMAIN/s: Protein kinase, catalytic domain (InterPro:IPR000719), Serine/threonine-protein kinase domain (InterPro:IPR002290), Tyrosine-protein kinase, catalytic domain (InterPro:…	0	0.894351	0.904335	0.955269	0.894353	0.989807	1.00282	1.0524	1.39761	0.426683	0.018511	0.0609284	0.00257907	0.086514	0.0361822	0.0510607	0.896238	0.932316	0.957912	0.911846	0.946246	0.955136	0.874968	0.834442	0.952759	0.961587	1.00546	0.944235	0.924722	0.948434	1.03785	0.796749	1.01553	1.02638	0.178547	0.426832	0.515011		S	2	___2	1	3.39534e-06	154.23	126.41	140.33
A8HX54	35.2	not assigned.unknown	no hits & (original description: Predicted protein OS=Chlamydomonas reinhardtii GN=CHLREDRAFT_167270 PE=4 SV=1)	0	0.98228	1.08566	1.07572	0.968051	1.08167	1.17989	0.589555	3.16005	0.898918	0.0829885	0.0224147	0.0265614	0.034409	0.00759333	0.0795786	1.06672	1.11124	1.04657	0.979288	1.06947	1.08205	0.900829	1.07626	1.09855	0.955506	1.09007	1.10334	1.00697	1.07968	1.26218	0.941676	1.07528	1.17416	0.646695	0.428232	0.696859		S	2	___1	1	1.81074e-10	174.47	130.17	118.16
A8IQS4	35.2	not assigned.unknown	(original description: Predicted protein OS=Chlamydomonas reinhardtii GN=CHLREDRAFT_145319 PE=4 SV=1)	0	0.979881	0.868138	0.973134	0.999504	0.934207	0.994432	0.794168	1.74949	0.170934	0.0567088	0.0865809	0.0111181	0.0267128	0.0550572	0.0278486	0.914937	0.830259	0.978589	1.01961	0.806952	0.98047	1.0051	0.967203	0.960342	0.990012	0.873985	0.967258	0.978833	0.981962	1.02291	1.02967	0.946673	0.993129	0.555342	0.428238	0.681169		S	2	___1	1	0.000258642	130.47	94.025	89.344
P06007	1.1.1.2	PS.lightreaction.photosystem II.PSII polypeptide subunits	(gnl|cdd|79223 : 662.0) no description available & (p06007|psbd_chlre : 657.0) Photosystem II D2 protein (Photosystem Q(A) protein) (PSII D2 protein) - Chlamydomonas reinhardtii & (atcg00270 : 613.0) PSII D2 protein; photosystem II reaction center protein D (PSBD); FUNCTIONS IN: electron transporter, transferring electrons within the noncyclic electron transport pathway of photosynthesis activity…	0	1.15133	1.07826	1.14509	1.07853	1.15678	1.07323	0.289645	0.00988428	0.864656	0.0555979	0.0542722	0.101155	0.0248796	0.0938189	0.0568176	1.21344	1.04461	1.21539	1.13432	1.0493	1.19073	1.10622	1.14087	1.02916	1.07293	1.22357	1.02716	1.05692	1.04952	1.13671	1.10573	1.19726	1.05581	0.575507	0.428459	0.63082		T	2	___1	1	1.8036e-22	196.16	170.15	146.5
A8HQ72	27.1.1	RNA.processing.splicing	(chl4|511153 : 303.0) no description available & (gnl|cdd|35328 : 142.0) no description available & (loc_os07g47630.2 : 116.0) no description available & (at4g02430 : 105.0) RNA-binding (RRM/RBD/RNP motifs) family protein; FUNCTIONS IN: RNA binding, nucleotide binding, nucleic acid binding; INVOLVED IN: biological_process unknown; LOCATED IN: cellular_component unknown; EXPRESSED IN: 23 plant str…	Cre01.g026450.t1.2	0.883701	1.00938	1.00096	0.82639	0.975188	0.916666	1.41152	2.66763	0.138938	0.0588996	0.0316141	0.012035	0.0657533	0.063999	0.0647445	0.946765	1.04499	0.993083	0.874223	0.998494	1.01481	0.830115	0.984639	0.994982	0.896826	1.00211	0.990972	0.766625	1.02132	0.872387	0.815717	0.902125	0.886639	0.51016	0.42919	0.31485		S	2	___1	0.994659	0.0103729	81.327	62.702	81.327
A8IQS4	35.2	not assigned.unknown	(original description: Predicted protein OS=Chlamydomonas reinhardtii GN=CHLREDRAFT_145319 PE=4 SV=1)	0	1.04907	0.99601	0.98754	1.0468	1.06281	1.11192	1.43096	0.0996356	0.703031	0.00203604	0.0286047	0.107883	0.0329809	0.0176453	0.0749411	1.04783	0.965763	1.0415	1.04795	0.999643	1.05779	1.05141	1.02263	0.863323	1.04836	1.05222	1.03057	1.01306	1.05303	1.17814	1.07897	1.08318	1.12707	0.403969	0.43077	0.124486		S	2	___1	0.999917	6.81509e-10	137.86	114.94	136.02
A8J829	34.12	transport.metal	(gnl|cdd|35428 : 705.0) no description available & (gnl|cdd|32399 : 614.0) no description available & (chl4|526219 : 592.0) no description available & (at5g44790 : 417.0) ATP dependent copper transporter vital for ethylene response pathway; RESPONSIVE-TO-ANTAGONIST 1 (RAN1); CONTAINS InterPro DOMAIN/s: Heavy metal transport/detoxification protein (InterPro:IPR006121), ATPase, P type, cation/coppe…	0	0.926408	1.04468	1.07662	0.974117	1.07266	1.11953	3.36039	7.82736	0.216286	0.00667957	0.0137791	0.014782	0.0106755	0.0154378	0.0320794	0.920693	1.05912	1.08543	0.924781	1.04323	1.05955	0.933751	1.03168	1.08487	0.986191	1.06741	1.08875	0.965927	1.09004	1.15276	0.970234	1.06053	1.11708	0.689909	0.433342	0.62522		S	2	___1	1	3.5461e-08	147.64	115.88	147.64
A8J2L0	35.2	not assigned.unknown	(original description: Predicted protein OS=Chlamydomonas reinhardtii GN=CHLREDRAFT_149734 PE=4 SV=1)	Cre03.g152150.t1.2	0.998461	1.0472	1.04564	0.930109	1.0196	1.12024	0.0874772	1.62437	0.743673	0.0286904	0.00621562	0.0187451	0.138853	0.0366616	0.052841	1.03026	1.05372	1.0242	0.990606	1.04134	1.05895	0.974517	1.04656	1.05377	0.989892	1.0527	1.06958	1.02906	1.0259	1.17502	0.771378	0.980193	1.11612	0.961431	0.433359	0.540811		S	2	___1	1	2.19959e-33	171.63	140.51	63.906
A8HN74	35.2	not assigned.unknown	(original description: Predicted protein OS=Chlamydomonas reinhardtii GN=CHLREDRAFT_172110 PE=4 SV=1)	0	0.993659	0.9279	0.966991	0.974428	0.893205	0.933174	0.241105	0.289236	0.00426095	0.15679	0.13973	0.038754	0.145978	0.0362935	0.0301015	1.17435	1.01263	0.951573	0.913166	0.766623	0.938319	0.893464	1.00445	1.01108	1.05588	0.895956	0.967797	1.06151	0.855615	0.913205	0.805898	0.928046	0.918522	0.418412	0.433898	0.193143		S	3	___1	0.844506	9.32562e-05	101.54	82.245	94.01
A8JG05	35.2	not assigned.unknown	(original description: Predicted protein OS=Chlamydomonas reinhardtii GN=CHLREDRAFT_160070 PE=4 SV=1)	Cre01.g004400.t1.2	1.16143	1.31354	1.30506	1.1704	1.26122	1.41688	0.235208	2.19966	0.550081	0.170817	0.0449313	0.0158974	0.0934941	0.0194856	0.0577282	1.32234	1.35512	1.28709	1.17976	1.26588	1.3108	0.982187	1.31961	1.31729	1.17592	1.2807	1.35273	1.26101	1.24172	1.46464	1.07427	1.26124	1.43327	0.399865	0.434425	0.760192		S	2	___1	1	2.2356e-86	234.51	222.97	111.09
A8ISG3	35.2	not assigned.unknown	(original description: Predicted protein (Fragment) OS=Chlamydomonas reinhardtii GN=CHLREDRAFT_145636 PE=4 SV=1)	0	1.08819	0.929659	0.868903	1.03911	0.898086	0.867216	0.427533	3.36405	0.0925739	0.023812	0.0262549	0.0626715	0.0433968	0.119747	0.0490876	1.10575	0.903658	0.934794	1.06109	0.929158	0.810045	1.09773	0.956161	0.861868	1.01718	0.77613	0.827976	1.0891	1.01549	0.922259	1.01107	0.902635	0.851412	0.327166	0.434852	0.578468		S	3	___1	1	1.86331e-09	133.51	115.14	133.51
A8JGT1	27.1.2	RNA.processing.RNA helicase	(chl4|519378 : 1105.0) no description available & (loc_os09g34910.1 : 446.0) no description available & (q41382|rh7_spiol : 425.0) DEAD-box ATP-dependent RNA helicase 7 (EC 3.6.1.-) - Spinacia oleracea (Spinach) & (at5g62190 : 414.0) DEAD/DEAH box RNA helicase PRH75; PRH75; FUNCTIONS IN: DEAD/H-box RNA helicase binding, ATP-dependent helicase activity; INVOLVED IN: RNA metabolic process; LOCATED …	Cre02.g118300.t1.2	0.877457	0.988732	0.999437	0.877729	0.930356	0.980384	0.889782	3.62265	0.474019	0.0402357	0.0297325	0.0308563	0.0391049	0.0360278	0.0208188	0.909076	1.01407	0.968503	0.891129	0.996124	0.999595	0.832168	0.956001	1.03021	0.890783	0.968125	1.00416	0.908638	0.896367	0.971553	0.833767	0.926577	0.965437	0.843348	0.436148	0.680906		S	2	___2	1	0.000797513	122.75	81.125	108.06
A8JGR7	35.2	not assigned.unknown	(original description: Predicted protein (Fragment) OS=Chlamydomonas reinhardtii GN=CHLREDRAFT_154268 PE=4 SV=1)	0	1.07008	1.05843	1.09133	1.1381	0.903315	0.845834	1.45193	1.17699	1.32362	0.195452	0.0152464	0.00960496	0.0158952	0.13501	0.0448369	1.20881	1.05194	1.10052	1.15487	1.0475	1.09211	0.846546	1.07585	1.08135	1.14737	0.797756	0.887978	1.14719	1.05545	0.850806	1.11975	0.856744	0.798719	0.199244	0.436242	0.576519		S	3	___1	1	6.68016e-06	135.69	89.898	73.296
A8IGD9	35.2	not assigned.unknown	(original description: Low-CO2-inducible protein OS=Chlamydomonas reinhardtii GN=LCI5 PE=4 SV=1)	0	1.08542	1.06673	0.91585	1.05255	1.14625	1.14448	1.69114	0.631535	1.5462	0.0585505	0.0578365	0.112908	0.0744145	0.0531904	0.0630421	1.02014	1	1.04576	1.10282	1.09768	0.86039	1.13329	1.1025	0.841397	1.07394	1.08776	1.09197	0.969782	1.15927	1.2144	1.11393	1.19172	1.12708	0.0119531	0.436299	0.283124		T	3	___3	0.759277	0.00632148	65.33	44.734	65.33
A8J0M0	35.2	not assigned.unknown	(original description: Predicted protein (Fragment) OS=Chlamydomonas reinhardtii GN=CHLREDRAFT_191474 PE=4 SV=1)	0	1.07907	0.897479	0.879226	1.07195	0.821003	0.861334	0.690639	4.75524	0.300235	0.0219627	0.0667666	0.0452672	0.0827856	0.0317807	0.0475227	1.08666	0.92434	0.925456	1.09623	0.946632	0.877235	1.05432	0.821465	0.834987	1.10906	0.796088	0.807027	0.977104	0.856794	0.895304	1.12969	0.810128	0.881672	0.553909	0.43669	0.778672		S	3	___1	0.877819	3.15306e-05	54.308	29.957	54.308
A8I3X1	35.2	not assigned.unknown	no hits & (original description: Predicted protein OS=Chlamydomonas reinhardtii GN=CHLREDRAFT_155527 PE=4 SV=1)	0	1.04184	0.981722	0.92513	1.00618	1.10034	1.05915	1.67104	0.438374	1.31253	0.0251138	0.0243105	0.125358	0.0452838	0.0166268	0.0301231	1.04371	0.999085	0.950042	1.01584	0.992143	1.03616	1.06597	0.953939	0.789187	0.987824	1.11664	1.034	0.972951	1.0834	1.09254	1.05776	1.10099	1.05092	0.354379	0.437035	0.178348		S	2	___1	1	8.23081e-21	196.37	142.8	98.572
A8JF70	35.2	not assigned.unknown	(original description: Outer dynein arm protein 1 OS=Chlamydomonas reinhardtii GN=ODA1 PE=1 SV=1)	0	1.12333	1.00175	1.12197	1.04782	0.992974	0.981069	0.586082	0.270563	0.152618	0.015868	0.167035	0.00904779	0.125417	0.206282	0.148382	1.1073	1.09844	1.11152	1.13903	1.09793	1.12733	1.12367	0.808872	1.12705	1.11221	0.756585	1.15149	1.12796	1.13652	0.880506	0.903285	1.08582	0.911214	0.474889	0.437443	0.683863		S	2	___1	0.999979	7.41208e-05	128.91	47.38	118.61
A8JBQ8	35.2	not assigned.unknown	(original description: Predicted protein OS=Chlamydomonas reinhardtii GN=CHLREDRAFT_177786 PE=4 SV=1)	0	0.981509	0.936967	0.928712	0.97165	0.9417	1.04955	1.2824	0.995435	1.65793	0.0253538	0.0189623	0.0646319	0.00519689	0.0239534	0.0535703	1.01054	0.956323	0.962106	0.970251	0.918424	0.969816	0.963733	0.936155	0.854214	0.969806	0.96925	0.999322	0.967626	0.930049	1.10593	0.977517	0.925801	1.04339	0.882129	0.437749	0.246399		S	2	___1	0.862546	0.00786653	91.549	48.951	76.332
A8IS98	35.2	not assigned.unknown	(original description: PRLI-interacting factor L OS=Chlamydomonas reinhardtii GN=LCI15 PE=4 SV=1)	Cre16.g685050.t1.1	0.914146	0.951864	0.980304	0.976315	0.95744	1.02014	2.07906	2.37242	0.779812	0.00649048	0.011027	0.00483689	0.0159226	0.0253434	0.0491003	0.909875	0.939131	0.975139	0.921615	0.958239	0.984727	0.910947	0.958222	0.981046	0.974537	0.939718	0.96643	0.961356	0.946134	1.06272	0.993052	0.986469	1.03128	0.432302	0.437951	0.0982456		S	2	___1	0.999988	0.00264687	103.43	64.68	94.122
A8IZM8	35.2	not assigned.unknown	(original description: Predicted protein (Fragment) OS=Chlamydomonas reinhardtii GN=CHLREDRAFT_94998 PE=4 SV=1)	0	0.85561	0.92066	0.948908	0.880003	0.934952	1.10798	0.898675	1.68586	0.529957	0.0534686	0.120355	0.110716	0.0785652	0.0648713	0.0589162	0.91614	0.984728	1.02141	0.835877	0.995428	0.821466	0.814812	0.781824	1.00385	0.966265	0.860125	1.04615	0.812548	0.975362	1.16347	0.861195	0.969369	1.11432	0.802642	0.438142	0.318343		S	2	___3	0.999801	2.83313e-19	185.59	133.98	111.66
A8IFI7	29.4	protein.postranslational modification	(chl4|520747 : 281.0) no description available & (at5g14720 : 104.0) Protein kinase superfamily protein; FUNCTIONS IN: protein serine/threonine kinase activity, protein kinase activity, kinase activity, ATP binding; INVOLVED IN: protein amino acid phosphorylation; LOCATED IN: plasma membrane; EXPRESSED IN: 24 plant structures; EXPRESSED DURING: 15 growth stages; CONTAINS InterPro DOMAIN/s: Protei…	0	1.06634	1.07831	1.06398	1.08515	1.04368	1.1738	0.991027	1.29254	1.73496	0.0449673	0.0318116	0.0189768	0.0393559	0.0103728	0.0583629	1.01968	1.11505	1.05911	1.06993	1.05959	1.04792	1.1094	1.06031	1.08492	1.08553	1.03681	1.12498	1.0456	1.05561	1.23844	1.12431	1.03861	1.15796	0.660357	0.439137	0.594653		S	2	___1	1	4.50485e-10	153.17	121.25	135.95
A8JAQ5	35.2	not assigned.unknown	(original description: Flagellar associated protein OS=Chlamydomonas reinhardtii GN=ANK17 PE=4 SV=1)	0	1.00435	1.008	1.04091	1.04211	1.04994	1.04622	0.252827	0.0285286	0.0260829	0.161507	0.133098	0.0257453	0.121898	0.0172632	0.0174962	1.12815	0.85567	1.05286	1.06324	1.06649	1.01136	0.821661	1.10184	1.05851	1.06945	1.03805	1.05569	1.14801	1.06974	1.02603	0.908862	1.04202	1.05695	0.633153	0.439322	0.934887		S	2	___1	0.999979	1.72508e-23	186.98	165.04	146.67
A8J3S6	35.2	not assigned.unknown	(original description: Predicted protein (Fragment) OS=Chlamydomonas reinhardtii GN=CHLREDRAFT_149227 PE=4 SV=1)	Cre16.g678650.t1.2	0.852696	1.02757	1.09517	1.00177	1.03829	1.18059	2.25347	4.29033	0.973016	0.0833803	0.0380795	0.0303039	0.032656	0.00962834	0.0735557	0.937585	0.9862	1.06398	0.849593	1.03535	1.09702	0.770911	1.06116	1.12451	0.990132	1.02793	1.09643	0.976519	1.04697	1.23259	1.03865	1.03996	1.21274	0.430246	0.439656	0.416478		S	2	___1	0.948917	3.86511e-10	149.74	117.35	138.28
A8J929	35.2	not assigned.unknown	(original description: Predicted protein OS=Chlamydomonas reinhardtii GN=MOT38 PE=4 SV=1)	0	0.916707	0.898991	0.935788	0.919277	0.922357	0.965853	0.862569	1.44258	0.208078	0.0163651	0.00641425	0.0131156	0.0259419	0.025697	0.0435301	0.933133	0.892432	0.935765	0.900404	0.899292	0.948915	0.916584	0.90525	0.922684	0.934805	0.923543	0.925507	0.889329	0.94744	1.01199	0.933697	0.896087	0.960065	0.630763	0.440481	0.476441		S	2	___1	1	7.04251e-10	167.71	126.02	130.1
A8J7F9	17.5.3	hormone metabolism.ethylene.induced-regulated-responsive-activated	(chl4|520613 : 838.0) no description available & (gnl|cdd|35552 : 396.0) no description available & (gnl|cdd|30859 : 379.0) no description available & (at1g55150 : 302.0) DEA(D/H)-box RNA helicase family protein; FUNCTIONS IN: helicase activity, ATP-dependent helicase activity, ATP binding, nucleic acid binding; LOCATED IN: cellular_component unknown; EXPRESSED IN: 22 plant structures; EXPRESSED …	0	1.289	1.25326	1.26979	1.25257	1.27464	1.35862	0.609951	0.889937	1.12253	0.0630634	0.0214087	0.0227857	0.0388297	0.0344799	0.0574199	1.35801	1.2681	1.29493	1.23435	1.22872	1.26393	1.27465	1.26297	1.25051	1.26626	1.31294	1.2958	1.20875	1.26492	1.40839	1.2827	1.24606	1.37166	0.635179	0.440613	0.379679		S	2	___1	0.999852	5.05149e-25	196.67	149.44	191.33
A8IL24	20.2.1	stress.abiotic.heat	(chl4|512545 : 365.0) no description available & (at2g26890 : 116.0) GRV2 has sequence similarity to the C. elegans protein RME-8 which is involved in endocytosis. grv2 mutants result in a reduction in gravitropic response in hypocotyls and shoots but do not affect root gravitropism. The mutants are defective in amyloplast sedimentation.; GRAVITROPISM DEFECTIVE 2 (GRV2); FUNCTIONS IN: binding, he…	0	0.986829	0.937434	0.912924	0.940964	0.910505	0.905367	1.60005	2.51464	0.444179	0.0315307	0.00869052	0.01767	0.0226128	0.0255034	0.0204335	0.954175	0.943887	0.912027	1.0171	0.927552	0.931026	0.989211	0.940863	0.89572	0.928637	0.929779	0.891293	0.967062	0.881586	0.928804	0.927193	0.920152	0.896003	0.324014	0.441076	0.390988		S	2	___1	0.999634	0.00118717	99.011	73.072	99.011
A8HT43	35.2	not assigned.unknown	(original description: Predicted protein (Fragment) OS=Chlamydomonas reinhardtii GN=CHLREDRAFT_187970 PE=4 SV=1)	0	0.878572	1.00433	0.996202	0.874337	0.99367	1.04511	0.267927	4.28015	0.440573	0.0443179	0.0266584	0.0236619	0.0591298	0.0256068	0.036289	0.927785	1.03458	0.974022	0.866116	0.994134	0.993474	0.841815	0.984274	1.02111	0.892731	1.00311	1.00559	0.922083	1.01322	1.07694	0.808196	0.964683	1.05279	0.82153	0.441375	0.940289		S	2	___2	0.999996	0.000571725	112.12	79.505	94.339
A8IXH3	35.2	not assigned.unknown	(original description: Predicted protein (Fragment) OS=Chlamydomonas reinhardtii GN=CHLREDRAFT_147546 PE=4 SV=1)	0	0.945819	1.05368	1.06939	0.886126	0.955948	1.07613	0.996208	2.60716	0.463053	0.0282971	0.0239077	0.0106923	0.0680905	0.114006	0.0494763	0.971763	1.08111	1.07614	0.95005	1.03721	1.05706	0.915645	1.04274	1.07496	0.962753	1.02769	1.02415	0.832562	0.824488	1.12265	0.863063	1.01567	1.0816	0.409215	0.441816	0.778676		T	2	___3	1	0.00593135	79.337	17.928	79.337
A8I0F0	35.2	not assigned.unknown	(original description: Ring3 protein OS=Chlamydomonas reinhardtii GN=CHLREDRAFT_182576 PE=4 SV=1)	Cre10.g455500.t1.2	1.06315	0.882196	0.98559	1.10264	1.06901	0.86048	0.37176	1.65151	1.54795	0.162586	0.0623492	0.032514	0.0494801	0.0332208	0.100442	1.21363	0.840766	0.987625	1.08513	0.851921	0.952107	0.890692	0.953902	1.01704	1.07719	1.09035	0.82505	1.07107	1.03074	0.973836	1.15967	1.08595	0.782555	0.911104	0.443575	0.670268		S	2	___2	1	2.69354e-07	133.15	80.324	133.15
A8HM85	29.4	protein.postranslational modification	(chl4|511378 : 914.0) no description available & (gnl|cdd|47550 : 256.0) no description available & (gnl|cdd|35255 : 210.0) no description available & (ipr017442 : 136.39725) no description available & (at5g39440 : 126.0) SNF1-related protein kinase 1.3 (SnRK1.3); FUNCTIONS IN: protein serine/threonine kinase activity, protein kinase activity, kinase activity, ATP binding; INVOLVED IN: protein am…	0	1.02754	1.06265	1.18166	1.11594	1.18087	1.28748	1.19173	1.21094	0.0124011	0.182842	0.178625	0.00942306	0.00837414	0.00568527	0.0709409	1.16658	0.856407	1.19032	1.09562	1.16359	1.18303	0.820427	1.16795	1.17163	1.12545	1.17838	1.21018	1.10966	1.17685	1.34961	1.11271	1.18737	1.30265	0.415151	0.44426	0.316107		S	2	___1	0.999896	2.69302e-36	200.71	94.536	200.71
A8JG05	35.2	not assigned.unknown	(original description: Predicted protein OS=Chlamydomonas reinhardtii GN=CHLREDRAFT_160070 PE=4 SV=1)	Cre01.g004400.t1.2	1.19816	1.22955	1.20991	1.13863	1.20324	1.3011	0.0264468	1.47386	1.26735	0.101512	0.0345802	0.0220182	0.0419742	0.0146316	0.0324891	1.31442	1.24243	1.18507	1.15303	1.19038	1.22702	1.12704	1.25584	1.21764	1.14517	1.21966	1.26367	1.17696	1.1985	1.32203	1.09378	1.19157	1.3176	0.499298	0.444575	0.991922		S	2	___1	1	2.2356e-86	234.51	222.97	111.09
A8JGJ7	31.2	cell.division	(chl4|512809 : 844.0) no description available & (gnl|cdd|34783 : 208.0) no description available & (ipr009091 : 185.1231) Regulator of chromosome condensation/beta-lactamase-inhibitor protein II & (loc_os02g34860.1 : 101.0) no description available & (at5g60870 : 97.1) Regulator of chromosome condensation (RCC1) family protein; FUNCTIONS IN: Ran GTPase binding; INVOLVED IN: biological_process un…	Cre12.g498450.t1.2	0.913812	1.11275	1.2845	0.814692	1.05359	1.00503	1.10306	1.58422	0.324417	0.0205537	0.223033	0.0263952	0.0282656	0.254213	0.198927	0.937253	0.861416	1.26904	0.905308	1.18974	1.31497	0.898874	1.28708	1.26948	0.788456	0.7605	1.22992	0.844623	1.21421	0.933109	0.810998	1.18606	0.852072	0.650501	0.444945	0.308979		S	4	___1	1	9.8557e-12	76.106	61.47	63.925
A8IA91	35.2	not assigned.unknown	(original description: Predicted protein OS=Chlamydomonas reinhardtii GN=CHLREDRAFT_141259 PE=4 SV=1)	0	1.12187	1.07568	0.997792	0.983773	1.08539	1.11161	0.0426653	0.0836527	1.13348	0.0513743	0.0252128	0.126724	0.141077	0.0272079	0.064277	1.06865	1.05265	0.858091	1.12577	1.07176	1.10535	1.17118	1.10262	1.02994	1.0528	1.10925	1.04048	0.821475	1.05576	1.16553	1.07705	1.09117	1.12882	0.353413	0.445978	0.96161		S	2	___1	0.974869	1.01801e-121	254.72	201.93	254.72
A8ISX0	35.2	not assigned.unknown	(original description: Predicted protein OS=Chlamydomonas reinhardtii GN=CHLREDRAFT_183397 PE=4 SV=1)	Cre04.g221850.t1.2	0.896609	0.942622	1.04111	0.887352	1.01581	0.932435	0.173814	1.10537	0.866805	0.00644743	0.0858355	0.0317717	0.0496007	0.0239932	0.141637	0.899487	0.843814	1.00628	0.889224	0.985277	1.0685	0.901116	0.998774	1.04855	0.907438	1.02203	0.832768	0.830859	1.03607	0.869969	0.92376	0.989312	1.09457	0.956579	0.446642	0.77969		S	2	___1	0.94278	0.000674106	125.73	74.936	125.73
A8J493	29.2.1.2.1.15	protein.synthesis.ribosomal protein.eukaryotic.40S subunit.S15	(chl4|525240 : 242.0) no description available & (gnl|cdd|36116 : 240.0) no description available & (p31674|rs15_orysa : 200.0) 40S ribosomal protein S15 - Oryza sativa (Rice) & (loc_os07g08660.1 : 200.0) no description available & (at5g09510 : 194.0) Ribosomal protein S19 family protein; FUNCTIONS IN: structural constituent of ribosome; INVOLVED IN: translation; LOCATED IN: cytosolic small ribos…	Cre08.g360900.t1.2	1.43208	1.40389	1.43083	1.41289	1.42321	1.48063	0.807541	1.68533	1.14171	0.0143086	0.0464148	0.0133618	0.0150362	0.0174001	0.0139259	1.43691	1.35836	1.44264	1.41598	1.40217	1.43354	1.44335	1.45114	1.41633	1.41934	1.42064	1.49223	1.42363	1.40723	1.48448	1.39571	1.44175	1.46519	0.435621	0.447067	0.911348		S	3	___1	1	3.12002e-06	157.37	107.34	71.03
A8J2Q6	31.1	cell.organisation	(chl4|520419 : 1888.0) no description available & (at2g35630 : 422.0) Member of the MAP215 family of microtubule-associated proteins required to establish interphase arrays of cortical microtubules.Mutants have defects in cytokinesis during pollen development. Vegetative phenotypes observed in temperature sensitive mutants include left-handed organ twisting, isotropic cell expansion and impairmen…	0	0.877321	0.91401	0.954254	0.946933	0.867351	0.87736	0.211771	0.0869248	0.634183	0.00436466	0.0699069	0.029882	0.113016	0.0781329	0.0888406	0.878317	0.841253	0.936405	0.8811	0.92011	0.988752	0.872544	0.980667	0.937605	0.817297	0.945477	0.979672	0.99877	0.789211	0.819732	1.02473	0.867367	0.832675	0.637674	0.449467	0.758711		S	2	___1	0.999999	0.00169186	123.11	74.828	123.11
A8I0F0	35.2	not assigned.unknown	(original description: Ring3 protein OS=Chlamydomonas reinhardtii GN=CHLREDRAFT_182576 PE=4 SV=1)	Cre10.g455500.t1.2	0.981547	0.93316	0.869974	0.973456	0.925741	0.972031	0.550346	0.713938	0.76466	0.0183446	0.0267552	0.0895718	0.0328755	0.0841669	0.0209547	0.971025	0.948742	0.807472	0.970886	0.948472	0.972592	1.00273	0.902266	0.829858	0.949077	0.94864	0.994442	0.960445	0.996088	0.968725	1.01085	0.832494	0.952925	0.361568	0.450186	0.791965		T	2	___1	0.776382	0.00257411	121.32	89.891	121.32
A8HMA7	35.2	not assigned.unknown	(chl4|511391 : 326.0) no description available & (at2g18990 : 202.0) thioredoxin domain-containing protein 9 homolog (TXND9); INVOLVED IN: cell redox homeostasis; LOCATED IN: cellular_component unknown; EXPRESSED IN: 23 plant structures; EXPRESSED DURING: 15 growth stages; CONTAINS InterPro DOMAIN/s: Thioredoxin fold (InterPro:IPR012335), Thioredoxin-like fold (InterPro:IPR012336), Thioredoxin do…	Cre01.g037800.t1.2	0.902356	1.00198	1.07322	0.941912	1.03916	1.17809	2.07148	5.1462	0.520287	0.0151907	0.0312767	0.0299735	0.0687253	0.0074439	0.0559347	0.898138	1.02017	1.04336	0.88972	1.01991	1.07299	0.91921	0.965868	1.10331	1	1.03602	1.12556	0.959693	1.0338	1.2369	0.866044	1.04766	1.1718	0.318244	0.451682	0.77235		S	2	___1	1	1.51875e-05	166.62	147.52	158.86
A8HMH3	35.2	not assigned.unknown	(original description: Predicted protein (Fragment) OS=Chlamydomonas reinhardtii GN=CHLREDRAFT_171955 PE=4 SV=1)	0	0.912702	0.972255	0.992848	0.867599	0.980477	0.885262	1.07711	1.2846	0.656038	0.0221382	0.0749644	0.0224526	0.0377089	0.0531673	0.0821031	0.932739	0.885798	0.966981	0.916431	1.01181	1.00427	0.888936	1.01915	1.00729	0.855383	0.933899	0.965973	0.837512	1.0384	0.887977	0.909901	0.969129	0.801835	0.815157	0.452828	0.290535		T	2	___2	0.999092	0.000707523	110.77	78.969	110.77
A8J1D7	35.2	not assigned.unknown	(original description: Predicted protein OS=Chlamydomonas reinhardtii GN=CHLREDRAFT_149525 PE=4 SV=1)	0	0.916563	0.832654	0.899952	0.893356	0.874026	0.886324	0.0236914	0.740347	0.33324	0.0279151	0.045115	0.0533661	0.0787422	0.0330329	0.0200138	0.948406	0.830376	0.842452	0.896309	0.788721	0.909513	0.904975	0.878864	0.947892	0.830431	0.840284	0.908297	0.981657	0.875495	0.869138	0.867978	0.906301	0.881537	0.768993	0.452871	0.33372		S	3	___2	0.866442	8.64664e-06	86.856	49.752	64.028
A8I3H9	35.2	not assigned.unknown	(original description: Predicted protein (Fragment) OS=Chlamydomonas reinhardtii GN=CHLREDRAFT_141735 PE=4 SV=1)	0	1.08258	0.987307	0.92431	1.06624	0.934216	0.961899	0.201233	3.23403	0.585396	0.035026	0.0182301	0.0484058	0.0841453	0.0289593	0.0238151	1.0597	1.00402	0.87519	1.06514	0.967866	0.925771	1.1229	0.990036	0.971968	1.04945	0.921701	0.982109	0.991754	0.913618	0.935644	1.15751	0.967328	0.967945	0.945647	0.45391	0.97513		S	2	___1	1	1.13727e-06	173.06	141.4	95.428
A8I0H0	11.8	lipid metabolism.exotics'(steroids, squalene etc)'	(chl4|510362 : 402.0) no description available & (gnl|cdd|38345 : 244.0) no description available & (at5g58800 : 216.0) Quinone reductase family protein; FUNCTIONS IN: oxidoreductase activity, FMN binding; INVOLVED IN: negative regulation of transcription; LOCATED IN: plasma membrane; EXPRESSED IN: 22 plant structures; EXPRESSED DURING: 13 growth stages; CONTAINS InterPro DOMAIN/s: Flavoprotein W…	Cre10.g456000.t1.2	0.984257	0.864504	0.959352	0.836209	0.860919	0.976411	0.603747	0.967442	0.73903	0.0989581	0.00451478	0.153712	0.0128007	0.0290378	0.0507026	0.940478	0.869644	1.13666	1.09755	0.861177	0.877609	0.91474	0.862693	0.863783	0.82962	0.87576	1.03495	0.850962	0.82746	0.947875	0.828045	0.879536	0.946408	0.533908	0.454639	0.916895		S	3	___1	0.869528	0.00133279	53.481	25.843	53.481
A8J202	35.2	not assigned.unknown	(original description: Predicted protein OS=Chlamydomonas reinhardtii GN=CHLREDRAFT_191640 PE=4 SV=1)	0	0.956765	1.00375	1.01435	0.964059	1.02187	1.09504	0.993151	2.10845	0.516361	0.0725711	0.00847003	0.0202913	0.0313287	0.0329692	0.0541073	0.993959	1.01268	1.03773	1.0032	0.995837	1.00135	0.873137	1.00273	1.00396	0.999991	1.01041	1.03684	0.942461	1.05905	1.14381	0.949727	0.996169	1.10449	0.9572	0.454648	0.418781		S	2	___1	0.939204	0.000363737	105.95	76.802	105.95
A8I0F0	35.2	not assigned.unknown	(original description: Ring3 protein OS=Chlamydomonas reinhardtii GN=CHLREDRAFT_182576 PE=4 SV=1)	Cre10.g455500.t1.2	1.07473	0.885041	0.98559	1.10264	1.06901	0.90041	0.591902	1.84487	1.54557	0.144377	0.0613768	0.032514	0.0494801	0.0332208	0.0679484	1.21363	0.836094	0.987625	1.08513	0.865128	0.952107	0.925436	0.953902	1.01704	1.07719	1.09035	0.887643	1.07107	1.03074	0.973836	1.15967	1.08595	0.83975	0.965116	0.455133	0.56454		S	2	___2	0.999931	1.57215e-07	144.74	106.8	133.15
A8J7L3	35.2	not assigned.unknown	(original description: Predicted protein OS=Chlamydomonas reinhardtii GN=CHLREDRAFT_150388 PE=4 SV=1)	0	0.89755	0.88687	0.965168	1.02077	0.935907	0.849304	0.230418	0.391208	1.42588	0.0308457	0.073463	0.0775623	0.0214708	0.128859	0.0375583	0.887283	0.871445	0.922086	0.93222	0.822345	0.918709	0.873147	0.966821	1.05471	1.03762	0.787147	0.892492	0.996597	1.01303	0.831141	1.0281	1.00755	0.824281	0.877779	0.455307	0.896183		S	3	___2	0.999897	0.0142454	54.049	37.248	49.793
A8HPY8	35.2	not assigned.unknown	(original description: Flagellar associated protein (Fragment) OS=Chlamydomonas reinhardtii GN=FAP159 PE=4 SV=1)	0	0.912201	0.864929	0.858048	0.924126	0.934758	0.899799	1.11988	0.454991	0.257194	0.0547767	0.0473468	0.0474288	0.0209599	0.0202024	0.0615231	0.974313	0.851809	0.845721	0.891494	0.917452	0.910423	0.870797	0.825526	0.817999	0.942176	0.95446	0.870293	0.901138	0.91409	0.858587	0.929065	0.935726	0.970518	0.556287	0.457183	0.00689577		S	2	___1	0.999305	0.000190697	110.31	47.76	110.31
A8J9A8	35.2	not assigned.unknown	(original description: Predicted protein OS=Chlamydomonas reinhardtii GN=CHLREDRAFT_193126 PE=4 SV=1)	0	0.897223	0.911317	0.886375	0.805711	0.88913	1.00048	0.00185351	1.46972	1.77913	0.0576495	0.0194256	0.0819401	0.00881602	0.0698518	0.0372728	0.889422	0.893587	0.910539	0.958376	0.932081	0.953516	0.843871	0.908283	0.79507	0.812043	0.838907	0.957442	0.795642	0.859585	1.0219	0.809448	0.9689	1.0221	0.563516	0.45827	0.305017		S	2	___1	0.998109	0.00587974	87.216	60.245	87.216
A8J087	35.2	not assigned.unknown	(original description: Vasa intronic gene OS=Chlamydomonas reinhardtii GN=VIG1 PE=4 SV=1)	Cre09.g393358.t1.1	0.876594	0.962111	0.963486	0.867685	0.931028	0.999588	0.0222161	2.57244	0.3823	0.0401445	0.0258885	0.0260186	0.0444334	0.0723176	0.0310061	0.922404	0.978921	0.949466	0.84755	0.932299	0.993508	0.859829	0.975114	0.947484	0.823833	0.849809	0.971201	0.912678	0.988442	0.994888	0.866545	0.954834	1.03268	0.227957	0.458396	0.70757		T	2	___1	0.79358	2.78319e-09	159.66	129.04	159.66
A8I754	35.2	not assigned.unknown	(original description: Predicted protein (Fragment) OS=Chlamydomonas reinhardtii GN=CHLREDRAFT_187531 PE=4 SV=1)	0	1.08515	1.02349	1.06611	0.95233	1.05822	1.05438	0.645527	0.286929	1.06486	0.0513026	0.032772	0.00539661	0.135034	0.0150754	0.00610605	1.13601	0.985942	1.06091	1.03342	1.03821	1.06574	1.08602	1.04632	1.07169	1.10696	1.04142	1.06131	0.857678	1.06266	1.05204	0.892348	1.07057	1.04979	0.859736	0.460217	0.329196		S	3	___2	0.817354	0.00892193	66.282	49.307	54.465
A8HSJ3	30.3	signalling.calcium	(chl4|514363 : 916.0) no description available & (loc_os03g57450.1 : 382.0) no description available & (at5g23580 : 355.0) unique family of enzymes containing a single polypeptide chain with a kinase domain at the amino terminus and a putative calcium-binding EF hands structure at the carboxyl terminus; recombinant protein is fully active and induced by Ca2+; calmodulin-like domain protein kinase…	Cre13.g571700.t1.1	1.07718	1.04591	1.01231	1.03846	0.982903	0.970505	1.30175	1.09886	0.0520301	0.0549037	0.0258352	0.00520161	0.0301596	0.0616912	0.0677051	1.13538	1.07319	1.01437	1.06982	1.02182	1.0064	1.02632	1.04273	1.01617	1.0049	1.0292	1.04142	1.0633	1.00664	0.906546	1.04718	0.912868	0.963549	0.249966	0.460233	0.248448		S	3	___1	1	1.49329e-08	157.02	119.47	96.777
A8IB42	28.1	DNA.synthesis/chromatin structure	(chl4|509874 : 1838.0) no description available & (gnl|cdd|35635 : 288.0) no description available & (at3g57060 : 145.0) binding; FUNCTIONS IN: binding; INVOLVED IN: mitosis, chromosome condensation; LOCATED IN: nucleus, condensin complex; EXPRESSED IN: 15 plant structures; EXPRESSED DURING: 6 growth stages; CONTAINS InterPro DOMAIN/s: Non-SMC condensin subunit, XCAP-D2/Cnd1 (InterPro:IPR007673),…	0	1.22173	1.01874	1.0743	1.17555	0.996505	0.923634	0.729586	1.86129	0.237565	0.0729955	0.0892512	0.0244472	0.0201628	0.164598	0.178634	1.30575	0.91681	1.10124	1.17393	1.0565	1.06814	1.18551	1.0829	1.05352	1.15561	0.806477	0.860998	1.19593	1.09458	1.12515	1.17511	1.08846	0.784753	0.345283	0.461075	0.50583		S	2	___1	0.995297	5.31034e-63	213.93	151.97	213.93
A8I8Q8	35.2	not assigned.unknown	(original description: Predicted protein (Fragment) OS=Chlamydomonas reinhardtii GN=CHLREDRAFT_166376 PE=4 SV=1)	0	0.903091	0.97397	0.998202	0.842294	0.990296	0.913593	0.579317	1.12428	0.283656	0.0192876	0.0854078	0.03584	0.114711	0.0193732	0.117577	0.887759	1.03662	1.02596	0.924746	0.876685	0.957741	0.896766	1.00861	1.0109	0.97465	0.995664	0.995879	0.780588	1.00642	0.77893	0.771644	0.968805	0.965971	0.918407	0.461357	0.405742		S	2	___1	0.978508	3.70279e-09	121.47	103.64	107.56
A8HPQ7	35.2	not assigned.unknown	(original description: Predicted protein (Fragment) OS=Chlamydomonas reinhardtii GN=CHLREDRAFT_146312 PE=4 SV=1)	0	1.0314	1.0046	1.01427	1.00185	0.962378	0.829159	1.15485	0.639592	0.525982	0.124968	0.137995	0.0269867	0.0472728	0.106407	0.0331994	1.14729	1.14193	1.00692	0.898996	1.00591	0.991718	1.04793	0.865952	1.04417	0.956907	0.997356	0.858127	1.05115	0.842885	0.79293	0.997497	1.04689	0.836419	0.0594592	0.461476	0.78301		S	2	___1	0.999998	0.0110459	57.836	19.609	57.836
A8IZ20	35.2	not assigned.unknown	(original description: Predicted protein OS=Chlamydomonas reinhardtii GN=CHLREDRAFT_14724 PE=4 SV=1)	0	0.922622	1.02007	1.04162	0.977557	0.981264	1.1348	0.669513	2.28925	0.747545	0.0171863	0.0173422	0.026028	0.0724401	0.118627	0.0150012	0.942427	1.031	1.0142	0.913802	1.02914	1.06599	0.911636	1.00008	1.04468	1.04445	1.06382	1.11814	0.987607	1.03465	1.14723	0.900617	0.845324	1.13903	0.0852646	0.462339	0.820405		S	2	___1	1	2.5194e-33	205.33	160.51	98.676
A8IU61	35.2	not assigned.unknown	(original description: Flagellar associated protein OS=Chlamydomonas reinhardtii GN=FAP217 PE=4 SV=1)	Cre07.g350350.t1.2	1.02534	0.909367	0.888432	1.00111	0.963926	0.881667	0.159051	3.22371	0.585074	0.0208829	0.0604554	0.037138	0.028688	0.0311916	0.0541986	1.04787	0.849697	0.852195	1.00664	0.970579	0.886691	1.02152	0.907825	0.92641	0.98667	0.933639	0.865707	1.03415	0.995949	0.942054	0.982506	0.96219	0.837241	0.878838	0.46253	0.690572		S	2	___1	1	0.0128237	102.62	59.18	102.62
Q6SA05	1.3.13	PS.calvin cycle.rubisco interacting	(chl4|522260 : 818.0) no description available & (p23489|rca_chlre : 816.0) Ribulose bisphosphate carboxylase/oxygenase activase, chloroplast precursor (RuBisCO activase) (RA) - Chlamydomonas reinhardtii & (loc_os11g47970.1 : 511.0) no description available & (at2g39730 : 506.0) Rubisco activase, a nuclear-encoded chloroplast protein that consists of two isoforms arising from alternative splicing…	Cre04.g229300.t1.1	1.08275	0.969576	0.991426	1.03597	0.986937	0.962409	0.14046	0.41146	0.0542563	0.152515	0.0877736	0.0274884	0.173348	0.117419	0.0513202	0.914902	0.869127	0.998336	1.21284	1.03149	0.961142	1.12049	1.00811	1.0148	0.837153	1.06622	1.00776	1.15549	0.852044	0.906698	1.11525	1.04254	0.972775	0.613331	0.463046	0.941651		S	2	___1	0.885372	4.46061e-23	119.2	96.008	48.025
A8J590	35.2	not assigned.unknown	(original description: Predicted protein OS=Chlamydomonas reinhardtii GN=CHLREDRAFT_192560 PE=4 SV=1)	0	1.21807	1.21073	1.23624	1.0981	1.21818	1.28349	0.196496	0.658736	0.499	0.0119139	0.0135447	0.0234918	0.227862	0.0239782	0.0292997	1.22412	1.2164	1.26114	1.20435	1.19527	1.23311	1.22575	1.22052	1.21447	0.835232	1.22013	1.25179	1.21966	1.19329	1.30958	1.2394	1.24113	1.28909	0.383889	0.463915	0.0941531		S	2	___1	0.999999	1.39552e-09	169.09	103.81	169.09
A8HV78	35.1	not assigned.no ontology	(chl4|523389 : 193.0) no description available & (gnl|cdd|35504 : 115.0) no description available & (loc_os12g07874.1 : 94.4) no description available & (at5g24320 : 85.1) Transducin/WD40 repeat-like superfamily protein; CONTAINS InterPro DOMAIN/s: WD40 repeat 2 (InterPro:IPR019782), WD40 repeat, conserved site (InterPro:IPR019775), WD40 repeat (InterPro:IPR001680), G-protein beta WD-40 repeat, r…	0	0.927472	1.03692	1.04285	0.942429	1.04776	1.12248	1.43644	4.99501	0.82084	0.0148699	0.0113621	0.00480576	0.0188259	0.0392429	0.061343	0.944606	1.03669	1.0401	0.91986	1.02567	1.04005	0.917949	1.04839	1.0484	0.951968	1.03066	1.05578	0.920743	1.09265	1.17647	0.954577	1.01997	1.1352	0.904168	0.46437	0.667426		S	2	___1	1	3.77719e-32	191.71	144.87	191.71
A8J696	35.2	not assigned.unknown	(original description: Uncharacterized protein OS=Chlamydomonas reinhardtii GN=CHLREDRAFT_205573 PE=4 SV=1)	0	1.01691	1.11691	1.10183	1.01327	1.08846	1.17703	0.340594	3.33862	0.998172	0.0718051	0.025354	0.00916675	0.0239251	0.0188906	0.0509894	1.09567	1.13921	1.11202	1	1.08934	1.09425	0.955075	1.12218	1.09923	1.02931	1.10511	1.13086	1.02474	1.09234	1.23176	0.985773	1.06793	1.16846	0.456239	0.464647	0.847706		S	2	___1	0.998064	2.46357e-18	190.8	152.66	161.2
A8J265	35.1.8	not assigned.no ontology.BSD domain-containing protein	(chl4|523555 : 437.0) no description available & (gnl|cdd|37901 : 97.8) no description available & (at1g03350 : 82.8) BSD domain-containing protein; FUNCTIONS IN: molecular_function unknown; INVOLVED IN: biological_process unknown; LOCATED IN: cellular_component unknown; EXPRESSED IN: 24 plant structures; EXPRESSED DURING: 15 growth stages; CONTAINS InterPro DOMAIN/s: BSD (InterPro:IPR005607); BE…	0	1.11384	1.04851	1.02758	1.1755	1.0369	1.07005	0.156301	0.297434	0.0345541	0.191465	0.137278	0.187403	0.0482201	0.178857	0.193232	1.22668	1.09785	0.812622	1.22205	0.893387	1.15663	0.892767	1.15431	1.11349	1.12963	0.830381	0.849775	1.17112	1.1384	1.21096	1.22577	1.14191	1.14942	0.522598	0.464925	0.237069		T	2	___1	0.79176	1.07968e-25	152.03	123.88	127.3
A8IV26	35.2	not assigned.unknown	(original description: Predicted protein OS=Chlamydomonas reinhardtii GN=CHLREDRAFT_173050 PE=4 SV=1)	0	0.976715	0.944742	0.968121	0.842712	1.05463	1.02588	0.0912063	0.639173	0.945696	0.0268002	0.109271	0.0873611	0.0888216	0.044978	0.162324	1.00579	0.822197	1.03231	0.953003	0.979988	1.00342	0.971351	1.03204	0.868634	0.82422	1.09419	1.10392	0.939323	1.00571	1.13445	0.764591	1.06399	0.839275	0.657567	0.464956	0.540512		S	2	___1	0.999954	1.09947e-08	144.1	94.069	142.19
A8J6D1	1.1.1.1	PS.lightreaction.photosystem II.LHC-II	(chl4|517514 : 491.0) no description available & (q93wd2|cb29_chlre : 489.0) Chlorophyll a-b binding protein CP29 - Chlamydomonas reinhardtii & (at2g40100 : 247.0) Lhcb4:3 protein (Lhcb4.3, light harvesting complex of photosystem II; light harvesting complex photosystem II (LHCB4.3); CONTAINS InterPro DOMAIN/s: Chlorophyll A-B binding protein (InterPro:IPR001344); BEST Arabidopsis thaliana protei…	Cre17.g720250.t1.2	1.1801	1.21115	1.22515	1.0202	1.2837	1.32264	0.0185395	1.03367	0.643114	0.251567	0.0118368	0.0276424	0.186173	0.0570228	0.0766858	1.4145	1.21182	1.23774	0.914316	1.19899	1.24424	1.21149	1.22263	1.19345	0.815583	1.34554	1.24923	1.06543	1.23319	1.40223	1.1796	1.27236	1.31648	0.436192	0.464999	0.318253		T	2	___1	0.993871	0.000363179	129.74	88.86	126.5
A8I8N5	35.2	not assigned.unknown	(original description: Predicted protein OS=Chlamydomonas reinhardtii GN=CHLREDRAFT_186587 PE=4 SV=1)	Cre02.g086600.t1.2	1.14612	0.961677	1.07363	1.13098	1.07889	1.04181	0.214855	0.889185	0.443514	0.0608566	0.127185	0.0153064	0.0151421	0.028606	0.180947	1.21538	0.815474	1.06715	1.1218	1.02276	1.09112	1.10119	1.0468	1.06264	1.11585	1.10888	0.833024	1.14613	1.05191	1.13936	1.13096	1.07588	1.15306	0.932727	0.466336	0.15089		S	2	___1	1	5.42533e-69	220.1	175.29	139.02
A8JE94	35.1	not assigned.no ontology	(chl4|517976 : 608.0) no description available & (at1g56290 : 190.0) CwfJ-like family protein; CONTAINS InterPro DOMAIN/s: Cwf19-like, C-terminal domain-1 (InterPro:IPR006768), Cwf19-like protein, C-terminal domain-2 (InterPro:IPR006767); BEST Arabidopsis thaliana protein match is: CwfJ-like family protein / zinc finger (CCCH-type) family protein (TAIR:AT5G56900.2); Has 2474 Blast hits to 2009 pr…	0	0.909415	0.918061	0.882146	0.857913	0.903739	1.03116	0.451284	0.812394	1.48033	0.0399693	0.0535889	0.0902118	0.0531606	0.0707914	0.0432222	0.953217	0.876283	0.850613	0.874922	0.978481	0.811934	0.900105	0.899419	0.983892	0.83208	0.98541	0.982899	0.919053	0.865872	1.0663	0.822605	0.859935	1.04429	0.536277	0.466849	0.81148		S	2	___2	0.999999	0.000805804	108.66	82.533	69.431
A8JDV2	29.2.4	protein.synthesis.elongation	(gnl|cdd|37450 : 175.0) no description available & (chl4|515712 : 162.0) no description available & (loc_os01g71230.1 : 156.0) no description available & (at3g49470 : 145.0) nascent polypeptide-associated complex subunit alpha-like protein 2 (NACA2); CONTAINS InterPro DOMAIN/s: Ubiquitin-associated/translation elongation factor EF1B, N-terminal (InterPro:IPR000449), Nascent polypeptide-associated…	0	0.937846	0.883794	0.949907	0.962588	0.930868	0.961335	0.505911	0.529101	0.0670971	0.0891071	0.0890363	0.0463152	0.00941283	0.0186044	0.0144838	1.02224	0.924603	0.957633	0.946631	0.945111	0.900215	0.844672	0.781668	0.991874	0.963307	0.939824	0.965521	0.97162	0.909479	0.973266	0.952836	0.943301	0.94522	0.709366	0.467406	0.298814		S	2	___1	0.993869	0.000825977	109.55	77.956	70.26
Q84QI2	35.2	not assigned.unknown	(original description: Predicted protein OS=Chlamydomonas reinhardtii GN=REX1 PE=4 SV=1)	Cre16.g683483.t1.1	1.02305	1.04743	1.02439	0.852432	0.979938	1.08741	1.02551	1.49097	1.44041	0.0457347	0.0452926	0.0440873	0.0539784	0.127205	0.0517667	1.07537	1.09023	1.05529	1.0031	1	1.04399	0.990677	1.05205	0.973904	0.87195	1.08349	1.05921	0.79141	0.837947	1.14716	0.893937	1.01838	1.05587	0.366665	0.467777	0.781366		S	2	___1	1	0.0144155	63.283	32.671	60.398
A8J7H2	35.2	not assigned.unknown	(chl4|520600 : 1288.0) no description available & (gnl|cdd|36593 : 181.0) no description available & (at2g30170 : 140.0) Protein phosphatase 2C family protein; FUNCTIONS IN: phosphoprotein phosphatase activity, catalytic activity; INVOLVED IN: biological_process unknown; LOCATED IN: chloroplast; EXPRESSED IN: 21 plant structures; EXPRESSED DURING: 15 growth stages; CONTAINS InterPro DOMAIN/s: Pro…	0	1.18513	1.05483	1.04924	1.13753	1.06893	0.94764	2.42754	6.12771	2.03198	0.019768	0.0221241	0.00965935	0.0160979	0.04724	0.0281474	1.20393	1.0316	1.04131	1.16451	1.07565	1.04641	1.18695	1.05723	1.06	1.11944	1.04893	0.945173	1.15029	1.03497	0.920807	1.14284	1.12288	0.97694	0.510314	0.468276	0.776633		S	2	___1	0.999982	2.15788e-47	195.13	154.73	171.9
A8I6R6	35.2	not assigned.unknown	(original description: Heat shock protein 22A OS=Chlamydomonas reinhardtii GN=HSP22A PE=3 SV=1)	Cre07.g318800.t1.2	1.00364	0.87347	0.855558	1.0261	0.837349	0.899375	0.32513	6.00415	1.08615	0.0465893	0.0206542	0.0371597	0.0124215	0.0286886	0.00361335	1.02887	0.897088	0.830247	0.949882	0.864528	0.838207	1.03218	0.858793	0.898219	1.01703	0.809462	0.895566	1.02101	0.866778	0.902755	1.04026	0.835808	0.899804	0.898572	0.46876	0.958399		S	2	___1	0.995665	0.00125625	112.17	76.631	112.17
A8J429	27.3.52	RNA.regulation of transcription.Global transcription factor group	(chl4|525374 : 595.0) no description available & (gnl|cdd|36687 : 108.0) no description available & (at1g73150 : 105.0) Bromodomain and extra terminal domain family protein. Binds to acetyl-histone H3. Binding is reduced when GTE3 is SUMOylated by SIZ1.; global transcription factor group E3 (GTE3); FUNCTIONS IN: histone binding, DNA binding; LOCATED IN: chloroplast; EXPRESSED IN: 21 plant structu…	0	0.896024	1.01328	1.02716	0.865705	1.04688	1.1201	0.888416	5.01689	1.13268	0.0397628	0.00544924	0.0154949	0.0602999	0.0193031	0.0678935	0.922466	1.00747	1.01592	0.850296	1.01828	1.04483	0.91531	1.01409	1.02072	0.867929	1.06913	1.05162	0.924862	1.0347	1.18739	0.804324	1.03679	1.12129	0.850328	0.469275	0.969517		S	2	___1	0.997993	0.000452544	119.62	97.038	119.62
A8IN02	35.2	not assigned.unknown	(original description: Predicted protein OS=Chlamydomonas reinhardtii GN=CHLREDRAFT_144901 PE=4 SV=1)	0	1.31457	1.27357	1.0973	1.24215	1.21999	1.35277	0.398273	0.16512	1.48928	0.00866047	0.0665697	0.230839	0.027235	0.0828495	0.023468	1.32454	1.32729	1.20869	1.31026	1.19909	0.831885	1.30891	1.29433	1.25131	1.26031	1.30808	1.36525	1.21083	1.14363	1.36735	1.2553	1.20826	1.3257	0.648076	0.469662	0.599845		Y	3	___2	0.999465	0.019429	41.482	23.184	41.482
A8J513	28.1	DNA.synthesis/chromatin structure	(chl4|526426 : 460.0) no description available & (gnl|cdd|36720 : 244.0) no description available & (gnl|cdd|85149 : 234.0) no description available & (loc_os05g46230.2 : 205.0) no description available & (at4g26110 : 201.0) Encodes a member of a small gene family of proteins with similarity to nucleosome assembly proteins.May function in nucleotide excision repair. Loss of function mutations hav…	Cre09.g416350.t1.2	0.90623	0.983323	0.996112	0.891889	0.928321	1.05024	0.0676352	1.99412	0.53186	0.0325778	0.0387452	0.0194681	0.0708857	0.0898399	0.0641207	0.919818	1.02606	1.01608	0.869058	0.950488	0.995075	0.929815	0.973424	0.977184	0.810962	1.019	0.983914	0.942975	0.926611	1.1119	0.921732	0.839349	1.0549	0.534296	0.470002	0.756234		S	2	___1	0.999996	2.10926e-07	140.82	86.801	116.63
A8HT27	3.6	minor CHO metabolism.callose	(chl4|514430 : 6032.0) no description available & (ipr003440 : 1500.0) Glycosyl transferase, family 48 & (gnl|cdd|36134 : 607.0) no description available & (gnl|cdd|66084 : 479.0) no description available & (at1g06490 : 461.0) encodes a gene similar to callose synthase; glucan synthase-like 7 (GSL07); FUNCTIONS IN: transferase activity, transferring glycosyl groups, 1,3-beta-glucan synthase activ…	0	1.04594	0.958947	1.02261	0.977188	0.976707	0.894413	0.573863	0.170941	0.280831	0.133515	0.127681	0.0529381	0.148367	0.0814292	0.073685	1.12051	0.814096	1.06363	1.12551	1.05516	0.962848	0.891794	1.00759	1.04135	0.806585	0.995623	0.843132	1.04894	1.04701	0.861257	1.07604	0.887484	0.978852	0.347011	0.47078	0.994203		S	2	___1	0.979129	4.72526e-37	201.75	163.55	120.24
A8IGD9	35.2	not assigned.unknown	(original description: Low-CO2-inducible protein OS=Chlamydomonas reinhardtii GN=LCI5 PE=4 SV=1)	0	1.19413	1.21618	1.4427	1.33046	1.23896	1.31923	0.0350456	0.249837	0.166439	0.221651	0.28929	0.00705357	0.0234102	0.349681	0.360678	0.938195	0.882506	1.43546	1.3239	1.36937	1.44955	1.32028	1.39666	1.4431	1.31564	1.43108	1.48665	1.31828	1.45046	1.56577	1.35744	0.835339	0.905267	0.149427	0.471167	0.102097		S	3	___2	0.853974	4.22329e-05	108.47	74.311	91.64
A8IWV0	27.3.26	RNA.regulation of transcription.MYB-related transcription factor family	(chl4|521436 : 1150.0) no description available & (at1g09770 : 510.0) Member of MYB3R- and R2R3- type MYB- encoding genes. Essential for plant innate immunity. Interacts with MOS4 and PRL1.; cell division cycle 5 (CDC5); FUNCTIONS IN: DNA binding, sequence-specific DNA binding transcription factor activity; INVOLVED IN: defense response signaling pathway, resistance gene-independent, defense resp…	0	1.1213	1.01029	0.930784	1.07349	0.900899	0.908624	0.687805	1.78624	0.142098	0.055127	0.106533	0.111895	0.0482251	0.142635	0.0648901	1.17977	1.05996	1.0526	1.11387	0.887994	0.832577	1.07027	1.08292	0.907177	1.12097	0.791568	0.837169	1.02455	1.06224	0.96388	1.07493	0.848889	0.924821	0.178487	0.471176	0.463962		T	2	___1	1	7.59832e-83	227.09	206.44	176.61
Q66T67	20.2.1	stress.abiotic.heat	(ipr001404 : 1500.0) Heat shock protein Hsp90 & (chl4|513163 : 1226.0) no description available & (gnl|cdd|81471 : 681.0) no description available & (gnl|cdd|35243 : 660.0) no description available & (at2g04030 : 624.0) Encodes a chloroplast-targeted 90-kDa heat shock protein located in the stroma involved in red-light mediated deetiolation response. Mutants are resistant to chlorate, have elonga…	Cre12.g514850.t1.2	1.25101	1.13966	1.02367	1.18212	1.0394	1.06081	0.305946	0.992015	0.185763	0.0465264	0.0247716	0.167772	0.0107237	0.18781	0.197322	1.29896	1.15539	1.1195	1.20605	1.11111	1.12156	1.24803	1.15249	0.829948	1.16986	0.822785	0.834009	1.18979	1.13873	1.19308	1.18669	1.15669	1.15535	0.120062	0.472035	0.519871		S	3	___1	0.950659	4.49764e-16	111.81	68.151	51.539
A8IFI7	29.4	protein.postranslational modification	(chl4|520747 : 281.0) no description available & (at5g14720 : 104.0) Protein kinase superfamily protein; FUNCTIONS IN: protein serine/threonine kinase activity, protein kinase activity, kinase activity, ATP binding; INVOLVED IN: protein amino acid phosphorylation; LOCATED IN: plasma membrane; EXPRESSED IN: 24 plant structures; EXPRESSED DURING: 15 growth stages; CONTAINS InterPro DOMAIN/s: Protei…	0	1.26505	1.33165	1.3266	1.17144	1.31421	1.4458	0.0315037	2.62685	1.38752	0.0859331	0.0347004	0.00981738	0.0979548	0.041925	0.0690486	1.36349	1.3661	1.33245	1.20501	1.2967	1.31526	1.22666	1.33214	1.33207	1.05897	1.36193	1.37156	1.23808	1.28332	1.5081	1.21726	1.29737	1.45776	0.433024	0.476046	0.748067		S	2	___1	1	7.44276e-09	176.56	132.19	125.73
A8J7F9	17.5.3	hormone metabolism.ethylene.induced-regulated-responsive-activated	(chl4|520613 : 838.0) no description available & (gnl|cdd|35552 : 396.0) no description available & (gnl|cdd|30859 : 379.0) no description available & (at1g55150 : 302.0) DEA(D/H)-box RNA helicase family protein; FUNCTIONS IN: helicase activity, ATP-dependent helicase activity, ATP binding, nucleic acid binding; LOCATED IN: cellular_component unknown; EXPRESSED IN: 22 plant structures; EXPRESSED …	0	1.08458	0.955282	0.943824	1.07406	0.954216	1.01931	0.477111	2.98127	0.636793	0.0547104	0.0267569	0.0415426	0.0280741	0.0661256	0.0381927	1.14466	0.971879	0.938595	1.03762	0.924415	0.905144	1.07146	0.969553	0.987734	1.04411	1.02998	1.0466	1.07829	0.908116	1.03567	1.09977	0.924552	0.975665	0.750244	0.476105	0.882266		S	2	___1	0.99998	7.78773e-14	183.89	134.41	160.46
A6Q0K5	35.2	not assigned.unknown	(original description: Calvin cycle protein CP12, chloroplastic OS=Chlamydomonas reinhardtii GN=CP12 PE=1 SV=2)	0	1.27101	1.14686	1.22364	1.18844	1.28228	1.20297	0.203521	0.103183	2.41478	0.0750785	0.0320125	0.0365253	0.058398	0.0259166	0.0180313	1.35017	1.12773	1.25511	1.20082	1.12903	1.18359	1.26204	1.18382	1.23221	1.17718	1.30226	1.20449	1.13649	1.25299	1.22019	1.25164	1.29158	1.18422	0.837562	0.476522	0.692851		T	3	___1	0.99999	2.29822e-14	133.94	108.61	126.09
A8J0H0	35.2	not assigned.unknown	(original description: DNA dependent protein kinase catalytic subunit OS=Chlamydomonas reinhardtii GN=PRKDC PE=3 SV=1)	0	0.940619	0.980483	1.13834	0.952097	1.01658	0.923209	0.443725	0.28858	0.702518	0.112406	0.105401	0.0598222	0.109552	0.183184	0.141724	0.882164	0.991953	1.14142	0.869484	1.07968	1.19656	1.07021	0.869817	1.07703	1.01641	0.823838	1.08359	1.01428	1.03749	0.814856	0.825603	1.18841	0.871176	0.791551	0.477864	0.757277		T	3	___1	1	2.66607e-08	90.912	61.566	77.693
A6Q0K5	35.2	not assigned.unknown	(original description: Calvin cycle protein CP12, chloroplastic OS=Chlamydomonas reinhardtii GN=CP12 PE=1 SV=2)	0	0.926314	0.898317	0.954804	0.947051	1.04745	0.917623	0.731207	0.246178	1.07201	0.093162	0.0185437	0.0619794	0.0961284	0.030909	0.061124	1.03313	0.919228	0.998227	0.883954	0.883874	0.883825	0.861858	0.891847	0.982361	0.929071	1.06352	0.987969	0.861183	1.01181	0.887425	1.0509	1.067	0.877475	0.855539	0.478758	0.288357		S	3	___2	0.868488	1.10325e-06	112.34	94.834	112.34
A8JEQ4	35.2	not assigned.unknown	(original description: Flagellar associated protein OS=Chlamydomonas reinhardtii GN=FAP57 PE=4 SV=1)	0	1.00738	1.02457	1.03023	0.966449	0.943094	0.905054	0.886937	0.0240045	0.097995	0.110122	0.0673499	0.0409888	0.147952	0.11051	0.130537	1.11285	1.0786	1.06748	0.893129	1.04601	0.98632	1.01615	0.949114	1.03688	1.05403	0.980013	0.802416	1.04969	0.818851	0.860775	0.795627	1.03042	1.05197	0.137116	0.478777	0.656511		Y	3	___2	0.868047	0.0246425	44.052	28.252	44.052
A8JGT1	27.1.2	RNA.processing.RNA helicase	(chl4|519378 : 1105.0) no description available & (loc_os09g34910.1 : 446.0) no description available & (q41382|rh7_spiol : 425.0) DEAD-box ATP-dependent RNA helicase 7 (EC 3.6.1.-) - Spinacia oleracea (Spinach) & (at5g62190 : 414.0) DEAD/DEAH box RNA helicase PRH75; PRH75; FUNCTIONS IN: DEAD/H-box RNA helicase binding, ATP-dependent helicase activity; INVOLVED IN: RNA metabolic process; LOCATED …	Cre02.g118300.t1.2	0.891737	0.988732	0.999437	0.880189	0.927983	0.980384	1.31098	3.78229	0.479851	0.0127584	0.0297325	0.0308563	0.0349716	0.0394579	0.0208188	0.906037	1.01407	0.968503	0.881517	0.996124	0.999595	0.887658	0.956001	1.03021	0.890783	0.968125	1.00416	0.908638	0.889247	0.971553	0.841145	0.926577	0.965437	0.861621	0.478955	0.443011		S	2	___2	1	0.000797513	122.75	81.125	82.942
A8I3E9	35.2	not assigned.unknown	(original description: Predicted protein (Fragment) OS=Chlamydomonas reinhardtii GN=CHLREDRAFT_166690 PE=4 SV=1)	0	0.875776	0.879612	0.930111	0.829111	0.882684	0.929287	0.283916	1.34995	0.212904	0.0763618	0.0411072	0.0362959	0.055472	0.016247	0.0360586	0.963811	0.834636	0.917102	0.827451	0.888961	0.971119	0.836066	0.91524	0.902112	0.812852	0.901433	0.915547	0.783585	0.873893	0.902118	0.890895	0.872728	0.970196	0.595349	0.480379	0.52645		S	2	___1	0.999717	8.46407e-05	96.489	75.094	96.489
A8HQG5	35.2	not assigned.unknown	(chl4|511229 : 732.0) no description available & (gnl|cdd|37756 : 154.0) no description available & (at2g40550 : 87.0) Encodes a nuclear localized target of E2Fa-DPa, transcription factors controlling cell cycle progression. Required for sister chromatid cohesion and DNA repair.; E2F target gene 1 (ETG1); FUNCTIONS IN: molecular_function unknown; INVOLVED IN: sister chromatid cohesion, postreplic…	0	0.94786	0.936803	0.969954	0.916199	0.963054	1.06905	1.0213	2.48582	1.53475	0.0207106	0.0334568	0.0275021	0.0136432	0.0214206	0.0712634	0.925221	0.916734	0.938235	0.965853	0.91825	0.987157	0.952506	0.975426	0.984469	0.900507	0.979096	0.990839	0.92283	0.971337	1.1303	0.925258	0.938728	1.08602	0.358713	0.481536	0.822564		S	2	___1	0.999944	0.000463104	107.74	67.012	101.93
A8I1C1	35.2	not assigned.unknown	(original description: Predicted protein OS=Chlamydomonas reinhardtii GN=CHLREDRAFT_168262 PE=4 SV=1)	0	1.09196	1.015	0.92313	1.09063	0.96229	0.848685	0.525263	2.39776	0.128262	0.0625153	0.109843	0.0852671	0.051661	0.118511	0.044194	1.0366	1.09818	1.01883	1.0795	0.890488	0.895304	1.15976	1.05634	0.855251	1.07127	0.826701	0.845304	1.14917	1.0461	0.894472	1.05144	1.01407	0.806278	0.171453	0.482106	0.60157		S	3	___1	0.799237	0.000634854	78.513	60.098	78.513
A8ISN0	35.2	not assigned.unknown	(original description: RWP-RK transcription factor OS=Chlamydomonas reinhardtii GN=RWP8 PE=4 SV=1)	0	1.11755	1.00175	0.928096	0.926156	0.873867	0.853796	4.23479	2.92625	0.885981	0.0291326	0.0400187	0.0353128	0.0837678	0.0380662	0.0237429	1.11589	0.985162	0.960386	1.08928	0.972691	0.890387	1.14748	1.04739	0.933514	0.919513	0.830092	0.842181	1.01305	0.892314	0.88111	0.845908	0.899195	0.838096	0.0484886	0.482511	0.0484238		S	2	___1	0.981787	2.48693e-06	154.88	127.62	154.88
A8J7W0	35.2	not assigned.unknown	(original description: Predicted protein OS=Chlamydomonas reinhardtii GN=CHLREDRAFT_176488 PE=4 SV=1)	0	1.04477	0.970958	1.02986	1.09146	0.961442	1.00344	0.0349202	0.951618	0.15717	0.125261	0.0839247	0.0230207	0.0270368	0.0923615	0.0531302	0.904699	0.876582	1.02285	1.08359	0.999088	1.01117	1.14603	1.0372	1.05558	1.10309	1.0265	1.02261	1.11074	0.855727	0.943384	1.06056	1.00209	1.04432	0.0891049	0.482551	0.310519		S	2	___1	0.999967	0.000338945	111.33	73.725	78.441
A8JG05	35.2	not assigned.unknown	(original description: Predicted protein OS=Chlamydomonas reinhardtii GN=CHLREDRAFT_160070 PE=4 SV=1)	Cre01.g004400.t1.2	1.2821	1.34403	1.32296	1.229	1.32104	1.42807	0.12805	1.77442	0.996944	0.117867	0.0342037	0.0288335	0.0555965	0.0309311	0.0526747	1.41679	1.37372	1.28993	1.23174	1.30663	1.3431	1.19779	1.35174	1.33586	1.2419	1.35447	1.37387	1.27701	1.29344	1.47907	1.16808	1.3152	1.43128	0.544207	0.483464	0.919609		S	2	___2	1	2.2356e-86	234.51	222.97	111.09
A8JG05	35.2	not assigned.unknown	(original description: Predicted protein OS=Chlamydomonas reinhardtii GN=CHLREDRAFT_160070 PE=4 SV=1)	Cre01.g004400.t1.2	1.2821	1.34403	1.32296	1.229	1.32104	1.42807	0.12805	1.77442	0.996944	0.117867	0.0342037	0.0288335	0.0555965	0.0309311	0.0526747	1.41679	1.37372	1.28993	1.23174	1.30663	1.3431	1.19779	1.35174	1.33586	1.2419	1.35447	1.37387	1.27701	1.29344	1.47907	1.16808	1.3152	1.43128	0.544207	0.483464	0.919609		S	2	___2	1	2.2356e-86	234.51	222.97	111.09
A8J0B7	35.2	not assigned.unknown	(original description: Predicted protein OS=Chlamydomonas reinhardtii GN=CHLREDRAFT_148925 PE=4 SV=1)	0	0.904909	0.984583	0.960818	0.893038	0.901772	1.04475	0.0538619	1.87685	1.35264	0.0225438	0.0190841	0.0531968	0.0799829	0.0573347	0.0452583	0.930693	1.00446	0.899401	0.89512	0.982884	0.990587	0.888915	0.966405	0.992466	0.929469	0.843416	0.998083	0.948319	0.958027	1.08845	0.801325	0.903872	1.04772	0.717232	0.483829	0.70568		S	2	___2	0.978133	0.00145438	110.6	77.672	84.403
A8J8E7	35.2	not assigned.unknown	(original description: Predicted protein OS=Chlamydomonas reinhardtii GN=CHLREDRAFT_151002 PE=4 SV=1)	0	0.940911	0.933054	0.970323	0.894434	0.957634	0.957835	0.196196	0.511196	0.308229	0.041641	0.0280108	0.013537	0.0591357	0.0247015	0.0909899	0.985066	0.940727	0.974701	0.935316	0.956428	0.955139	0.90235	0.902006	0.981129	0.826182	0.930853	0.981201	0.926746	0.979524	0.85744	0.930374	0.962525	1.03486	0.319127	0.484239	0.307497		S	2	___1	1	0.00928038	97.472	42.49	82.494
A8IVW0	35.2	not assigned.unknown	(original description: Predicted protein OS=Chlamydomonas reinhardtii GN=CHLREDRAFT_190332 PE=4 SV=1)	0	1.07332	0.958084	0.895182	1.01229	0.943501	0.893796	0.336932	1.9335	0.122567	0.112522	0.00908336	0.0214984	0.122851	0.0455424	0.0141479	1.1309	0.948638	0.878931	0.943664	0.958858	0.887057	1.14541	0.966755	0.919559	1.07702	0.900326	0.877473	1.08924	0.939087	0.902526	0.870608	0.99109	0.90139	0.742399	0.484286	0.313308		S	2	___2	1	2.14596e-13	173.49	140.78	146.18
A8I8M2	35.2	not assigned.unknown	(original description: Predicted protein OS=Chlamydomonas reinhardtii GN=CHLREDRAFT_186581 PE=4 SV=1)	0	1.04968	0.938304	0.907445	1.00155	0.914588	0.918234	0.513555	3.12658	0.327863	0.0324759	0.00561902	0.0305336	0.0615322	0.0402418	0.0487631	1.03721	0.943862	0.891619	1.02528	0.932625	0.888073	1.08654	0.938426	0.942643	0.989417	0.869758	0.951446	0.946992	0.926413	0.862251	1.06825	0.947592	0.941005	0.727351	0.484558	0.957911		S	2	___1	0.999998	9.4151e-06	168.89	152.31	168.89
A8IHY4	35.2	not assigned.unknown	(original description: Predicted protein (Fragment) OS=Chlamydomonas reinhardtii GN=SSA17 PE=4 SV=1)	0	0.968531	0.854241	0.860245	0.997849	0.983048	0.849824	2.27357	4.36358	2.2354	0.0539678	0.0077461	0.0319957	0.0268208	0.0292272	0.0105437	1.0053	0.845864	0.8965	0.993724	0.861144	0.848277	0.906574	0.855715	0.835959	0.996192	0.978189	0.860127	1.02546	1.0144	0.839055	0.971895	0.956555	0.850289	0.672168	0.484832	0.240083		S	2	___1	0.999953	9.14175e-05	122.52	78.972	113.35
A8JAQ5	35.2	not assigned.unknown	(original description: Flagellar associated protein OS=Chlamydomonas reinhardtii GN=ANK17 PE=4 SV=1)	0	0.882565	0.873487	0.902463	0.928992	0.909393	0.921284	0.404112	0.0433799	0.0192199	0.034214	0.0367898	0.107641	0.0971681	0.0981562	0.0783879	0.916721	0.907034	0.872161	0.848293	0.879284	1.02201	0.88268	0.834143	0.813221	0.965688	0.835726	1.01134	1.00247	1.02082	0.884104	0.81882	0.871631	0.868404	0.51302	0.485569	0.737693		S	2	___1	0.993763	6.65276e-05	129.2	99.278	97.214
A8IS72	29.3.4.99	protein.targeting.secretory pathway.unspecified	(chl4|516748 : 1031.0) no description available & (gnl|cdd|36000 : 465.0) no description available & (loc_os08g37444.3 : 364.0) no description available & (at4g30600 : 337.0) signal recognition particle receptor alpha subunit family protein; FUNCTIONS IN: nucleoside-triphosphatase activity, signal recognition particle binding, GTP binding, GTPase activity, nucleotide binding; INVOLVED IN: intrace…	Cre16.g683950.t1.2	0.887932	1.04139	1.02952	0.94043	0.958154	1.08382	0.193628	4.32498	2.15665	0.021211	0.011765	0.0135943	0.0440738	0.0559929	0.0373877	0.90918	1.04993	1.01505	0.887859	1.02797	1.03147	0.866758	1.04627	1.04203	0.956601	0.89773	1.04071	0.974134	1.00829	1.10741	0.890555	0.968443	1.10333	0.679331	0.485707	0.97882		S	3	___1	1	4.04219e-07	153.04	102.86	96.777
A8J181	35.2	not assigned.unknown	(original description: Predicted protein (Fragment) OS=Chlamydomonas reinhardtii GN=CHLREDRAFT_148820 PE=4 SV=1)	0	1.1302	1.01472	1.01592	0.94202	0.993911	0.986107	0.637845	0.0542637	0.304918	0.0664565	0.159946	0.148395	0.168756	0.113027	0.117511	1.16389	1.10545	0.847354	1.05365	0.830043	1.07357	1.17307	1.10868	1.12684	0.858251	1.01703	1.07686	0.831537	0.871111	1.02809	1.13627	1.09359	0.853369	0.663864	0.485957	0.295137		T	3	___1	0.857199	0.00282814	45.137	29.337	43.865
A8I9T2	31.1	cell.organisation	(chl4|518407 : 1280.0) no description available & (p46870|klp1_chlre : 1278.0) Kinesin-like protein KLP1 - Chlamydomonas reinhardtii & (gnl|cdd|30097 : 494.0) no description available & (gnl|cdd|39481 : 319.0) no description available & (ipr001752 : 252.4959) Kinesin, motor domain & (at1g59540 : 210.0) Encodes a kinesin-like protein.; ZCF125; FUNCTIONS IN: microtubule motor activity, ATP binding;…	Cre02.g073750.t1.2	0.987916	1.18548	1.0833	1.06713	1.19144	1.28306	0.706219	0.848347	0.272427	0.198516	0.0115229	0.200197	0.221459	0.0144777	0.0382809	0.893192	1.18724	0.852828	1.21605	1.17318	1.21406	0.854504	1.19602	1.18301	1.17331	1.2034	1.23906	1.21552	1.17534	1.30876	0.812578	1.19557	1.30136	0.100838	0.48633	0.898177		S	2	___1	0.999461	2.13776e-117	241.11	211.53	186.36
A8J5N1	35.2	not assigned.unknown	(original description: Predicted protein OS=Chlamydomonas reinhardtii GN=CHLREDRAFT_192620 PE=4 SV=1)	0	0.858123	1.00304	1.06767	0.882862	1.02326	1.16764	1.34178	5.51357	0.555867	0.0458756	0.0388816	0.0412448	0.0633775	0.021451	0.0535065	0.910726	1.0043	1.02022	0.826413	0.963547	1.08789	0.83723	1.04128	1.09491	0.815694	0.999585	1.1235	0.891285	1.0414	1.22715	0.941607	1.02879	1.15226	0.990773	0.487465	0.643292		S	3	___1	1	0.00160159	69.612	21.323	50.226
A8JBF5	35.2	not assigned.unknown	(original description: Predicted protein OS=Chlamydomonas reinhardtii GN=CHLREDRAFT_193702 PE=4 SV=1)	0	1.01731	1.08894	1.10961	0.982296	1.11644	1.20745	0.971467	4.5938	1.56438	0.0530471	0.0126431	0.00519219	0.00819684	0.0304387	0.0637166	1.07854	1.09763	1.11388	0.985147	1.07443	1.11112	0.988246	1.09474	1.10383	0.975572	1.1359	1.14028	0.97989	1.13206	1.26704	0.991427	1.08137	1.21503	0.828277	0.487936	0.675967		S	2	___1	1	4.1901e-27	191.51	158.32	132.15
A8J4M0	35.2	not assigned.unknown	(original description: Predicted protein OS=Chlamydomonas reinhardtii GN=CHLREDRAFT_192075 PE=4 SV=1)	Cre09.g409850.t1.2	0.982914	0.842026	0.980744	0.831518	1.0157	1.08172	0.393352	0.935238	1.40719	0.137078	0.0296955	0.120814	0.0465217	0.156432	0.00847214	0.974583	0.873343	0.841554	1.12397	0.838461	1.04223	0.850191	0.814274	1.05844	0.826832	1.10599	1.07604	0.787517	0.835069	1.09146	0.880206	1.10604	1.07765	0.334701	0.487946	0.33625		T	2	___1	0.950071	3.15445e-06	166.6	138.93	166.6
A8JGJ1	35.2	not assigned.unknown	(original description: Predicted protein OS=Chlamydomonas reinhardtii GN=CHLREDRAFT_154039 PE=4 SV=1)	0	1.11388	1.09392	1.13052	1.09535	1.03747	1.16502	0.150554	0.6935	0.235001	0.0126694	0.0223904	0.00864767	0.0323633	0.16819	0.055649	1.10383	1.06809	1.14022	1.10969	1.10774	1.12772	1.12811	1.10593	1.12362	1.10314	1.12089	1.10122	1.05981	0.843875	1.20356	1.12311	1.14764	1.19028	0.85052	0.491046	0.172282		S	2	___1	0.999918	0.000314179	139.98	93.589	139.98
A8JHD0	35.1	not assigned.no ontology	(chl4|513162 : 394.0) no description available & (loc_os03g12810.1 : 166.0) no description available & (at5g42770 : 155.0) Maf-like protein; FUNCTIONS IN: molecular_function unknown; INVOLVED IN: biological_process unknown; LOCATED IN: cytoplasm; CONTAINS InterPro DOMAIN/s: Maf-like protein (InterPro:IPR003697); BEST Arabidopsis thaliana protein match is: Maf-like protein (TAIR:AT5G66550.1). & (g…	0	1.04416	0.855394	0.912628	0.943073	0.920321	0.891979	0.314063	1.87949	1.14846	0.0476579	0.0535538	0.00903596	0.106701	0.0257418	0.0373823	1.09784	0.917161	0.922521	1.00683	0.827089	0.90481	1.02781	0.821932	0.910551	0.980956	0.891302	0.850758	1.02566	0.929256	0.923683	0.822599	0.940405	0.901497	0.369227	0.491787	0.667425		S	2	___1	0.99575	1.75145e-05	125.31	51.815	88.338
A8J9T0	29.2.1.2.1.12	protein.synthesis.ribosomal protein.eukaryotic.40S subunit.S12	(gnl|cdd|38616 : 167.0) no description available & (q9xhs0|rs12_horvu : 166.0) 40S ribosomal protein S12 - Hordeum vulgare (Barley) & (loc_os07g05580.1 : 166.0) no description available & (at2g32060 : 152.0) Ribosomal protein L7Ae/L30e/S12e/Gadd45 family protein; FUNCTIONS IN: structural constituent of ribosome; INVOLVED IN: translation; LOCATED IN: cytosolic small ribosomal subunit, cytosolic ri…	#N/A	1.4336	1.37566	1.32292	1.40663	1.3496	1.46071	1.62975	2.43755	4.30372	0.00547789	0.0242362	0.0234264	0.0314446	0.0296243	0.0130156	1.43981	1.40363	1.32566	1.42945	1.36111	1.29824	1.43154	1.36222	1.34485	1.37503	1.3737	1.44617	1.43792	1.31653	1.47128	1.40695	1.35857	1.46466	0.845297	0.4918	0.493149		S	3	___1	1	8.06281e-09	78.428	64.787	74.861
A8J3J8	35.2	not assigned.unknown	(original description: Predicted protein OS=Chlamydomonas reinhardtii GN=CHLREDRAFT_149151 PE=4 SV=1)	0	0.894786	0.991796	0.994519	0.916304	1.00357	1.07054	0.770242	2.42657	0.265051	0.0356537	0.0112249	0.0215491	0.0733634	0.0657101	0.0723643	0.929528	0.984513	1.01727	0.896542	1.00472	0.974414	0.858286	0.986153	0.991874	0.94546	1.02864	0.994461	0.970607	0.929014	1.1385	0.832845	1.05305	1.07867	0.741975	0.492048	0.657411		T	2	___1	0.963381	0.00462762	87.667	48.645	87.667
A8J6D1	1.1.1.1	PS.lightreaction.photosystem II.LHC-II	(chl4|517514 : 491.0) no description available & (q93wd2|cb29_chlre : 489.0) Chlorophyll a-b binding protein CP29 - Chlamydomonas reinhardtii & (at2g40100 : 247.0) Lhcb4:3 protein (Lhcb4.3, light harvesting complex of photosystem II; light harvesting complex photosystem II (LHCB4.3); CONTAINS InterPro DOMAIN/s: Chlorophyll A-B binding protein (InterPro:IPR001344); BEST Arabidopsis thaliana protei…	Cre17.g720250.t1.2	1.2892	1.06771	1.07011	1.18155	1.14958	0.960774	1.55822	5.8328	2.92821	0.0301688	0.0209725	0.0523754	0.0633954	0.0107376	0.0223441	1.29185	1.04502	1.12743	1.25779	1.08639	1.05814	1.31795	1.07173	1.02475	1.22729	1.14034	0.986555	1.10918	1.14705	0.948777	1.20819	1.16136	0.946992	0.734889	0.492136	0.801354		T	3	___1	1	1.84198e-09	180.3	129.51	43.501
A8INH1	35.2	not assigned.unknown	(chl4|523946 : 496.0) no description available & (at4g32630 : 112.0) ArfGap/RecO-like zinc finger domain-containing protein; FUNCTIONS IN: ARF GTPase activator activity, zinc ion binding; INVOLVED IN: regulation of ARF GTPase activity; LOCATED IN: cellular_component unknown; EXPRESSED IN: 18 plant structures; EXPRESSED DURING: 10 growth stages; CONTAINS InterPro DOMAIN/s: Arf GTPase activating pr…	0	1.296	1.07555	1.06636	1.24191	1.06946	0.979632	0.2691	1.27308	0.039602	0.0740589	0.182665	0.203204	0.0313961	0.188627	0.210886	1.37987	0.866268	1.19451	1.23963	1.15742	1.1725	1.26849	1.20295	0.832064	1.25305	0.852841	0.838701	1.26622	1.15813	0.878118	1.20647	1.19742	1.22208	0.459973	0.493821	0.473739		S	3	___1	0.958226	3.47029e-15	99.319	75.043	80.554
A8J3V2	35.2	not assigned.unknown	(original description: Predicted protein OS=Chlamydomonas reinhardtii GN=CHLREDRAFT_174609 PE=4 SV=1)	0	0.941357	0.963391	0.850936	0.974035	0.915951	0.9127	0.232977	0.965539	0.535619	0.0817704	0.0150823	0.0705094	0.0243406	0.0789942	0.048015	0.990123	0.951554	0.932352	0.986993	0.958246	0.810648	0.846954	0.980373	0.809808	1.00162	0.824885	0.896498	0.955581	0.956978	0.96672	0.964903	0.96599	0.874881	0.404466	0.49419	0.40146		S	2	___1	0.812677	0.000137172	70.316	49.07	70.316
A8J6K7	27.3.99	RNA.regulation of transcription.unclassified	(chl4|517596 : 541.0) no description available & (at4g32720 : 111.0) Encodes AtLa1, a member of the highly abundant phosphoprotein La proteins. Predominantly localized to the nucleoplasm and was also detected in the nucleolar cavity. Has RNA binding activity. Required for normal ribosome biogenesis and embryogenesis.; La protein 1 (La1); FUNCTIONS IN: RNA binding; INVOLVED IN: embryo development,…	0	1.0736	0.957696	1.03625	1.06693	1.01073	0.957797	0.122628	0.933548	0.510847	0.0529818	0.0915059	0.0244949	0.0253837	0.0509338	0.122476	1.13462	1.02245	1.01007	1.03928	0.997628	1.05862	1.0469	0.853011	1.04005	1.0844	1.0592	1.06733	1.07859	1.01535	0.825555	1.03782	0.957649	0.980508	0.735557	0.494405	0.868148		S	3	___2	0.904433	0.000419855	47.195	25.577	46.117
A8J2S3	35.1.14	not assigned.no ontology.S RNA-binding domain-containing protein	(chl4|520401 : 581.0) no description available & (gnl|cdd|30885 : 145.0) no description available & (at3g23700 : 141.0) Nucleic acid-binding proteins superfamily; FUNCTIONS IN: RNA binding; INVOLVED IN: response to cold; LOCATED IN: chloroplast stroma, nucleus, chloroplast; EXPRESSED IN: 23 plant structures; EXPRESSED DURING: 13 growth stages; CONTAINS InterPro DOMAIN/s: Nucleic acid-binding, OB-…	Cre03.g148950.t1.2	1.17463	0.922646	1.0837	1.12628	1.05005	1.15793	0.68434	2.00583	0.699288	0.0360721	0.0997946	0.0124528	0.0157076	0.151982	0.0694684	1.20193	0.863333	1.09022	1.18821	1.03786	1.06935	1.13373	0.866742	1.09155	1.12116	1.19342	1.10507	1.14391	1.06602	1.23661	1.11377	0.890716	1.13211	0.441806	0.495672	0.902185		S	3	___1	0.99836	7.7731e-15	103.12	76.949	103.12
Q695H0	29.2.2	protein.synthesis.ribosome biogenesis	(chl4|518479 : 1962.0) no description available & (gnl|cdd|35834 : 363.0) no description available & (gnl|cdd|47550 : 275.0) no description available & (at3g08720 : 238.0) Encodes a ribosomal-protein S6 kinase. Gene expression is induced by cold and salt (NaCl). Activation of AtS6k is regulated by 1-naphthylacetic acid and kinetin, at least in part, via a lipid kinase-dependent pathway. Phosphory…	Cre02.g076900.t1.1	0.891175	0.956846	0.977973	0.871543	0.931237	0.943573	1.07746	2.83354	0.040028	0.0459302	0.0127332	0.0242256	0.0256429	0.0423579	0.00606838	0.874446	0.966016	1.00579	0.943125	0.942308	0.961471	0.855954	0.962214	0.966664	0.872737	0.884127	0.948261	0.896568	0.966181	0.936719	0.845324	0.943402	0.945741	0.35902	0.495715	0.749293		S	2	___1	0.999411	0.00279826	77.668	39.784	77.668
A8IEJ2	35.2	not assigned.unknown	(original description: Predicted protein (Fragment) OS=Chlamydomonas reinhardtii GN=CHLREDRAFT_143939 PE=4 SV=1)	0	1.03804	0.875755	0.857207	1.00662	0.896992	0.866204	0.0064816	4.12183	0.243627	0.0388984	0.0158392	0.0266466	0.0644356	0.00568057	0.0704341	0.996573	0.863656	0.849735	1.04382	0.869926	0.886792	1.07372	0.893682	0.835094	1.00716	0.900311	0.851859	0.941921	0.900231	0.804048	1.07079	0.890432	0.942707	0.814111	0.496116	0.725031		S	2	___1	1	0.000448934	124.81	124.81	70.808
A8I023	29.3.3	protein.targeting.chloroplast	(chl4|510291 : 1135.0) no description available & (loc_os10g35010.1 : 157.0) no description available & (at1g06950 : 155.0) Encodes a protein thought to be a part of the translocon at the chloroplast inner envelope. Involved in protein import into the chloroplast and chloroplast biogenesis.; translocon at the inner envelope membrane of chloroplasts 110 (TIC110); INVOLVED IN: protein import into c…	0	1.12553	1.00822	0.993913	1.03165	1.01273	0.964607	0.541939	0.976679	0.272202	0.0752575	0.0360891	0.0159059	0.026865	0.0462471	0.154807	1.21145	1.03799	1.00889	1.0713	0.968081	0.977217	1.09384	1.01858	0.99563	1.05089	1.06543	1.00676	1.04311	0.993856	0.793088	1.00096	0.978913	1.09397	0.529969	0.496758	0.816723		S	3	___1	0.997076	1.28057e-10	104.5	84.744	60.255
A6Q0K5	35.2	not assigned.unknown	(original description: Calvin cycle protein CP12, chloroplastic OS=Chlamydomonas reinhardtii GN=CP12 PE=1 SV=2)	0	1.10866	1.06785	1.07546	1.07358	1.10916	1.15428	0.873302	0.365909	1.22782	0.0420401	0.0328759	0.0271573	0.0556885	0.0323223	0.0257854	1.15124	1.10355	1.0725	1.06719	1.06119	1.0499	1.10755	1.03881	1.10398	1.05796	1.13146	1.14631	1.02737	1.07209	1.18311	1.13541	1.12393	1.13342	0.940878	0.49689	0.103814		T	2	___1	1	7.57777e-67	225.86	186.44	201.08
A8J072	35.2	not assigned.unknown	(original description: Predicted protein (Fragment) OS=Chlamydomonas reinhardtii GN=CHLREDRAFT_95135 PE=4 SV=1)	0	0.937397	0.900936	0.954694	0.872143	0.904178	0.881588	1.00325	0.0639861	0.373679	0.0340854	0.0640824	0.014668	0.0531043	0.074677	0.057247	0.973256	0.910401	0.946197	0.905417	0.95976	0.971631	0.93352	0.832648	0.946253	0.931756	0.865076	0.92479	0.829896	0.990287	0.903317	0.854775	0.857172	0.816658	0.2658	0.497203	0.184495		S	2	___2	1	3.28443e-08	129.75	105.16	129.75
A8J9Q2	35.2	not assigned.unknown	(original description: Predicted protein OS=Chlamydomonas reinhardtii GN=CHLREDRAFT_193234 PE=4 SV=1)	0	0.900483	0.992437	0.991616	0.857926	0.937371	0.958886	0.926872	1.70768	0.0270511	0.0770534	0.0143527	0.00664973	0.0647635	0.0770694	0.0411268	0.958361	0.998969	0.986819	0.930066	1.00236	0.988823	0.813022	0.97598	0.999207	0.893707	0.849021	0.978491	0.783167	0.990787	0.986542	0.896906	0.972305	0.911625	0.135499	0.49816	0.970731		T	2	___2	0.968973	6.07555e-06	109.37	78.83	73.459
A8I395	35.2	not assigned.unknown	(original description: Predicted protein OS=Chlamydomonas reinhardtii GN=CHLREDRAFT_141710 PE=4 SV=1)	0	1.13846	1.04156	0.993825	1.01596	1.01073	0.898353	3.29915	3.6997	0.873586	0.0113587	0.0519343	0.0196222	0.0258795	0.0321834	0.0586535	1.13364	1.07113	1.01337	1.15144	0.981589	0.974131	1.13031	1.07195	0.993969	1.00819	1.03829	0.966057	1.04484	1.01855	0.862967	0.994861	0.975359	0.866035	0.166325	0.498558	0.0999572		Y	2	___1	0.897008	0.0199634	55.806	14.792	55.806
A8I8Y3	35.2	not assigned.unknown	(original description: Predicted protein (Fragment) OS=Chlamydomonas reinhardtii GN=CHLREDRAFT_141476 PE=4 SV=1)	0	0.974725	0.905227	0.938115	0.932552	0.868016	0.877967	1.68684	1.61047	0.0683619	0.0196315	0.0130054	0.0592725	0.0260872	0.0403195	0.0429476	0.97558	0.894282	0.885906	0.95468	0.901795	1.00255	0.993915	0.919605	0.925894	0.937049	0.854678	0.832671	0.956099	0.913314	0.918099	0.904509	0.836055	0.883131	0.363511	0.498854	0.082665		S	2	___1	0.999969	0.000551628	115.12	75.493	115.12
Q65Z16	35.2	not assigned.unknown	(original description: NSG17 protein OS=Chlamydomonas reinhardtii GN=NSG17 PE=2 SV=1)	Cre14.g620850.t1.2	0.868482	0.982499	0.993821	0.928455	0.985734	1.003	0.961235	3.82204	0.638238	0.0190087	0.0157034	0.0174388	0.00999929	0.0287763	0.058443	0.888081	0.987791	0.97396	0.850124	0.994873	1.00088	0.86724	0.964833	1.00663	0.935255	0.957992	0.970567	0.933136	0.983765	1.07047	0.916974	1.01544	0.967969	0.894053	0.499098	0.702773		S	2	___2	0.987799	3.73717e-05	149.42	108.73	56.553
A8ISZ1	29.2.2.1	protein.synthesis.ribosome biogenesis.export from nucleus	(chl4|522118 : 1831.0) no description available & (gnl|cdd|35285 : 526.0) no description available & (gnl|cdd|30834 : 312.0) no description available & (loc_os08g45010.1 : 176.0) no description available & (at5g60790 : 175.0) member of GCN subfamily; GENERAL CONTROL NON-REPRESSIBLE 1 (GCN1); FUNCTIONS IN: transporter activity; LOCATED IN: plasma membrane; EXPRESSED IN: 24 plant structures; EXPRES…	Cre04.g222700.t1.2	0.992621	1.17446	1.19013	1.00758	1.06425	1.2349	0.157422	2.30933	0.502422	0.0344868	0.041083	0.0104033	0.143055	0.153953	0.02344	1.03063	1.20505	1.18137	0.96334	1.12776	1.20163	0.983889	1.19056	1.18739	1.0713	1.17822	1.20858	1.1077	1.12541	1.24259	0.843737	0.889114	1.25353	0.851798	0.499125	0.441421		T	2	___1	1	0	329.46	295.41	156.29
A8JAQ5	35.2	not assigned.unknown	(original description: Flagellar associated protein OS=Chlamydomonas reinhardtii GN=ANK17 PE=4 SV=1)	0	0.875509	1.04518	0.993013	0.897261	1.10488	1.14008	1.11569	2.52143	0.360487	0.0255451	0.0565684	0.1591	0.0908519	0.0071832	0.0653839	0.904418	1.07228	0.80938	0.85598	1.0831	1.08015	0.866128	0.98016	1.08951	0.958787	1.09669	1.09204	0.940085	1.10786	1.21454	0.792911	1.1101	1.11365	0.248019	0.50092	0.839007		S	2	___3	0.999979	1.72508e-23	186.98	165.04	146.67
A8HMH3	35.2	not assigned.unknown	(original description: Predicted protein (Fragment) OS=Chlamydomonas reinhardtii GN=CHLREDRAFT_171955 PE=4 SV=1)	0	0.919037	0.933432	1.00801	0.809785	0.968979	0.934655	1.07304	1.87791	0.994794	0.0294985	0.0675099	0.0067315	0.00667921	0.0988355	0.0553234	0.945763	0.85594	1.00323	0.923961	0.964839	1.01571	0.887386	0.979516	1.0051	0.814278	0.857507	0.930468	0.812966	1.0459	0.881543	0.80211	1.00353	0.991952	0.283995	0.500988	0.755717		Y	3	___2	0.834318	0.00810463	68.088	51.595	68.088
A8HNY3	35.2	not assigned.unknown	(original description: Predicted protein OS=Chlamydomonas reinhardtii GN=CHLREDRAFT_147008 PE=4 SV=1)	0	1.08602	1.11757	0.989556	0.955456	1.03122	0.860237	1.10121	0.785958	0.0252187	0.155009	0.02323	0.129693	0.190489	0.137831	0.0328947	0.907886	1.09301	1.09667	1.19025	1.12051	0.84536	1.15991	1.13919	1.02664	0.892609	1.08392	0.844347	0.80433	1.13493	0.898061	1.16943	0.874815	0.838305	0.391558	0.501738	0.260116		T	3	___1	0.813011	1.57147e-46	151.02	130.27	116.83
A8ISH7	35.2	not assigned.unknown	(original description: Voltage-gated Ca2+ channel, alpha subunit (Fragment) OS=Chlamydomonas reinhardtii GN=CAV6 PE=4 SV=1)	0	1.044	0.950189	0.977805	0.98211	0.947139	0.960378	0.367172	0.504264	0.118151	0.055372	0.0612464	0.00874648	0.0255825	0.0990088	0.114338	1.10371	1.00815	0.967859	1.03394	0.956301	0.984295	0.994339	0.886116	0.981262	0.981865	1.00878	1.02964	1.00781	0.999701	0.828406	0.956651	0.832934	1.02309	0.66602	0.502347	0.814728		S	3	___1	0.930064	0.00055953	76.068	55.254	50.945
A8J072	35.2	not assigned.unknown	(original description: Predicted protein (Fragment) OS=Chlamydomonas reinhardtii GN=CHLREDRAFT_95135 PE=4 SV=1)	0	0.890263	0.893633	0.954694	0.872749	0.90539	0.879709	0.501789	0.266064	0.396372	0.0318836	0.0759133	0.014668	0.0551221	0.0737489	0.0480346	0.926444	0.910401	0.946197	0.878068	0.95976	0.971631	0.866277	0.810737	0.946253	0.931756	0.868712	0.92479	0.863913	0.990287	0.829184	0.82258	0.857172	0.885153	0.439852	0.502606	0.676461		S	2	___2	1	4.01632e-09	135.31	111.43	129.75
A8I6H0	35.2	not assigned.unknown	(original description: Predicted protein OS=Chlamydomonas reinhardtii GN=CHLREDRAFT_167787 PE=4 SV=1)	0	1.1431	1.00298	0.919189	1.12066	1.00164	1.03332	0.657627	3.51342	1.14951	0.028894	0.0345494	0.0955287	0.0390987	0.00265971	0.0439529	1.17482	1.0389	0.812339	1.13619	1.00007	0.948886	1.11828	0.969984	0.996343	1.09097	1.00471	0.996647	1.16496	1.00006	1.08204	1.10605	1.00014	1.02127	0.850575	0.50303	0.811174		S	2	___1	1	0.0152274	82.671	50.736	82.671
A8IW73	35.2	not assigned.unknown	(original description: Predicted protein OS=Chlamydomonas reinhardtii GN=CHLREDRAFT_190393 PE=4 SV=1)	0	1.00953	1.08473	1.08168	1.00975	1.07291	1.03944	0.333023	1.06694	0.120002	0.0114868	0.0173348	0.0197167	0.0287813	0.0256228	0.113735	1.01515	1.07657	1.10441	1.01713	1.07299	1.07145	0.996319	1.10464	1.06919	1.0272	1.07336	1.07469	1.02551	1.0983	0.912253	0.976529	1.04706	1.13138	0.831461	0.504805	0.931067		S	2	___1	0.999832	4.68474e-05	134.38	60.217	105.36
A8I186	35.2	not assigned.unknown	(original description: Predicted protein (Fragment) OS=Chlamydomonas reinhardtii GN=CHLREDRAFT_143167 PE=4 SV=1)	0	0.85922	0.890142	0.961797	0.905967	0.94209	1.0049	1.54823	2.51667	0.00793981	0.0580048	0.0194191	0.0139991	0.0095394	0.0211891	0.0723301	0.88634	0.87169	0.949751	0.898698	0.910402	0.958486	0.792623	0.888333	0.977155	0.897343	0.946173	0.922784	0.904342	0.919157	1.05915	0.916214	0.960941	1.03277	0.521517	0.506319	0.254711		S	2	___1	1	1.48151e-05	150.35	133.12	102.07
A8IFI7	29.4	protein.postranslational modification	(chl4|520747 : 281.0) no description available & (at5g14720 : 104.0) Protein kinase superfamily protein; FUNCTIONS IN: protein serine/threonine kinase activity, protein kinase activity, kinase activity, ATP binding; INVOLVED IN: protein amino acid phosphorylation; LOCATED IN: plasma membrane; EXPRESSED IN: 24 plant structures; EXPRESSED DURING: 15 growth stages; CONTAINS InterPro DOMAIN/s: Protei…	0	0.918114	0.93529	0.993351	0.86177	0.946617	0.943106	0.711168	1.31652	0.35473	0.0350553	0.05112	0.0317122	0.00923998	0.0488614	0.0842186	0.957936	0.876493	0.979476	0.891916	0.969214	1.02964	0.904489	0.960162	0.970941	0.851721	0.974543	0.974645	0.863688	0.890198	1.007	0.8699	0.975111	0.84767	0.937109	0.506363	0.343439		S	2	___1	0.993011	0.000194063	69.876	50.583	66.977
A8IGD9	35.2	not assigned.unknown	(original description: Low-CO2-inducible protein OS=Chlamydomonas reinhardtii GN=LCI5 PE=4 SV=1)	0	1.0322	1.42358	1.11375	1.08588	1.20376	1.80644	0.422933	0.580182	0.746951	0.191313	0.461401	0.53339	0.249075	0.559621	0.285868	0.983459	0.891392	0.859225	0.86997	1.66796	0.755307	1.24317	1.71139	1.72673	1.23666	1.84388	1.82895	1.22259	0.9602	2.08039	0.798385	0.807186	1.50998	0.023479	0.506496	0.140158		S	2	___1	0.975965	1.26336e-141	259.27	190.23	86.258
A8JI54	35.2	not assigned.unknown	(original description: Predicted protein (Fragment) OS=Chlamydomonas reinhardtii GN=CHLREDRAFT_195187 PE=4 SV=1)	0	1.06396	1.07938	0.910465	1.14685	1.00655	1.19116	0.829639	0.165114	0.957056	0.130113	0.158875	0.195764	0.03651	0.154708	0.0182911	0.914912	1.15903	1.13633	1.15486	0.896432	0.789554	1.1221	1.18267	0.805515	1.11657	1.09904	1.18711	1.18739	0.827949	1.17522	1.13658	1.09267	1.21113	0.479681	0.506976	0.417907		T	2	___2	1	0.0131717	68.657	17.371	68.657
A8HW15	35.2	not assigned.unknown	(original description: Predicted protein OS=Chlamydomonas reinhardtii GN=CHLREDRAFT_161093 PE=4 SV=1)	0	1.06912	1.01577	0.952593	1.03543	0.981228	0.896614	0.993949	2.56531	0.0420606	0.0356543	0.0243088	0.0535546	0.031639	0.0325013	0.0889817	1.05522	1.01239	0.909845	1.04251	0.993326	0.935269	1.10963	1.04159	1.01267	1.04759	0.943699	0.998006	0.999514	1.00015	0.83151	1.05918	0.99983	0.860328	0.943726	0.507114	0.281688		S	2	___1	1	1.52076e-71	183.88	147.84	113.23
A8HX54	35.2	not assigned.unknown	no hits & (original description: Predicted protein OS=Chlamydomonas reinhardtii GN=CHLREDRAFT_167270 PE=4 SV=1)	0	1.18702	1.12176	1.09338	1.14673	1.10686	1.00983	0.706142	1.29951	0.148069	0.0342361	0.0304497	0.0146607	0.0163465	0.0351181	0.164595	1.22635	1.15455	1.09301	1.17075	1.09438	1.0789	1.16394	1.11636	1.10822	1.16558	1.09715	1.11853	1.13632	1.14581	0.820459	1.1383	1.07762	1.09049	0.517012	0.507157	0.341059		S	2	___1	1	3.60205e-247	286.07	223.61	247.58
A8IHY4	35.2	not assigned.unknown	(original description: Predicted protein (Fragment) OS=Chlamydomonas reinhardtii GN=SSA17 PE=4 SV=1)	0	1.1615	1.04123	1.04258	1.13006	1.03646	1.1018	0.250824	4.21506	1.4321	0.0492	0.0228713	0.0215147	0.00538373	0.013481	0.0287788	1.21831	1.06606	1.05182	1.13356	1.02103	1.01799	1.13264	1.03659	1.05794	1.12717	1.05202	1.06858	1.13627	1.02861	1.11783	1.12674	1.02874	1.119	0.637825	0.507595	0.731585		S	2	___1	1	4.76776e-08	141.71	98.292	109.39
A8IE32	29.3.3	protein.targeting.chloroplast	(chl4|520970 : 1514.0) no description available & (q43715|toc75_pea : 309.0) Protein TOC75, chloroplast precursor (75 kDa translocon at the outer-envelope-membrane of chloroplasts) (Import intermediate associated protein of 75 kDa) (75 kDa chloroplast outer envelope protein) - Pisum sativum (Garden pea) & (loc_os03g16440.1 : 302.0) no description available & (at3g46740 : 300.0) Component of the t…	Cre03.g175200.t1.2	0.9268	0.92773	1.01394	0.858775	0.882911	1.0587	0.380632	2.80388	0.625358	0.0752387	0.0450706	0.0615527	0.0203509	0.055654	0.0679999	0.989667	0.962388	0.944689	0.843437	0.944024	1.06242	0.947296	0.876778	1.03471	0.851989	0.879469	1.13167	0.842684	0.829058	0.997102	0.881652	0.940206	1.04732	0.906879	0.508034	0.961021		S	2	___2	0.987989	1.03494e-05	156.73	105.14	136.36
A8J433	35.2	not assigned.unknown	(original description: Flagellar associated protein OS=Chlamydomonas reinhardtii GN=FAP291 PE=4 SV=1)	0	1.2183	0.997456	0.839542	0.839103	0.850256	0.863159	3.88971	2.79839	3.24696	0.0747033	0.100498	0.0307324	0.0419724	0.062347	0.0498411	1.14631	1.00951	0.872443	1.21315	0.891473	0.834606	1.29545	1.09138	0.811576	0.819316	0.813793	0.908682	0.887311	0.922246	0.870891	0.810681	0.81473	0.809904	0.12851	0.508059	0.143957		T	3	___1	0.999991	0.00208853	78.505	54.779	72.771
A8J8T6	35.2	not assigned.unknown	(original description: Predicted protein OS=Chlamydomonas reinhardtii GN=CHLREDRAFT_151557 PE=4 SV=1)	Cre16.g663150.t1.2	1.2129	0.996982	0.892515	1.21774	1.11263	0.966414	0.764236	3.10452	0.218294	0.103335	0.0878966	0.130091	0.0880589	0.0479681	0.0915006	1.09887	0.895609	0.844352	1.2395	1.04337	1.03982	1.30034	1.05197	0.793373	1.19975	1.08569	1.04792	1.14007	1.08418	0.867437	1.31341	1.16801	0.983888	0.141389	0.508334	0.57485		S	2	___1	0.99999	7.93206e-40	198.48	162.86	165.9
A8I462	35.2	not assigned.unknown	(original description: Predicted protein OS=Chlamydomonas reinhardtii GN=CHLREDRAFT_141821 PE=4 SV=1)	0	0.993826	0.930832	0.968798	0.96256	0.903023	0.907925	0.340715	0.199598	0.0176614	0.165372	0.105123	0.0413396	0.0935231	0.110394	0.108661	1.14895	0.973667	0.924206	1.0127	0.811055	0.976342	0.819827	1.00778	1.00585	0.857168	1.02458	0.898374	0.99486	0.809004	0.804355	1.03565	0.875487	1.02105	0.353465	0.508691	0.70402		S	2	___1	1	1.07549e-05	74.222	52.873	72.676
A8I297	29.2.3	protein.synthesis.initiation	(chl4|518927 : 303.0) no description available & (p56336|if5a4_soltu : 186.0) Eukaryotic translation initiation factor 5A-4 (eIF-5A-4) (eIF-4D) - Solanum tuberosum (Potato) & (loc_os07g40580.1 : 186.0) no description available & (at1g13950 : 177.0) Encodes eukaryotic translation initiation factor 5A (EIF-5A).In mammalian cells it functions as a shuttle protein that translocates mRNA from the nucl…	Cre02.g097400.t1.2	1.3221	1.20583	1.20355	1.30974	1.17147	1.27226	0.132507	2.87247	0.800672	0.0438	0.0423653	0.0425289	0.0238037	0.0423145	0.0663847	1.36447	1.25265	1.16469	1.277	1.17014	1.19698	1.32482	1.1947	1.24898	1.28268	1.21787	1.26254	1.32742	1.135	1.34297	1.31913	1.16154	1.21127	0.923318	0.508796	0.691972		S	3	___1	0.999999	1.04871e-29	165.03	143.04	96.793
A8IGD9	35.2	not assigned.unknown	(original description: Low-CO2-inducible protein OS=Chlamydomonas reinhardtii GN=LCI5 PE=4 SV=1)	0	1.44481	1.02288	1.44569	1.40449	1.48283	1.63189	1.81372	1.67262	1.35433	0.0405557	0.339419	0.0489586	0.0496129	0.0279392	0.12495	1.49072	0.772918	1.39026	1.41386	1.40929	1.4638	1.42984	0.886435	1.48302	1.43059	1.5085	1.50446	1.34727	1.45307	1.75421	1.4356	1.48692	1.637	0.308558	0.508951	0.273818		S	2	___2	0.999823	2.94043e-20	141.06	83.494	106.76
A8HYR6	35.2	not assigned.unknown	(original description: C1, subunit of the circadian RNA-binding protein CHLAMY 1 OS=Chlamydomonas reinhardtii GN=CRB1 PE=4 SV=1)	0	0.920089	0.907141	0.985412	0.954122	0.949434	1.08972	1.64743	2.43595	0.375063	0.0545848	0.0557789	0.0394064	0.0199822	0.0158545	0.0774655	0.908037	0.942867	0.941052	0.979692	0.935689	0.998819	0.872537	0.842867	1.01637	0.939895	0.949986	1.00291	0.945503	0.965006	1.1518	0.976967	0.933311	1.11444	0.210885	0.510142	0.270761		S	2	___1	0.997701	7.51695e-05	132.81	92.893	132.81
Q0Z9B8	35.2	not assigned.unknown	(original description: LciD OS=Chlamydomonas reinhardtii GN=LCID PE=2 SV=1)	Cre04.g222800.t1.2	1.29702	1.24215	1.15923	1.25222	1.14609	0.874824	5.80178	7.14771	3.81929	0.0156384	0.0303324	0.0168125	0.0293591	0.05186	0.0465898	1.27903	1.23872	1.17614	1.30733	1.21368	1.14252	1.30471	1.27405	1.15903	1.22362	1.14254	0.857217	1.28228	1.19963	0.927651	1.25077	1.09609	0.839603	0.244591	0.510323	0.223928		S	3	___1	1	1.29026e-05	94.152	65.415	87.748
A8J5W8	28.1	DNA.synthesis/chromatin structure	(chl4|513290 : 1300.0) no description available & (loc_os11g36390.1 : 414.0) no description available & (at5g22010 : 323.0) replication factor C1 (RFC1); FUNCTIONS IN: DNA clamp loader activity, nucleoside-triphosphatase activity, DNA binding, nucleotide binding, ATP binding; INVOLVED IN: DNA replication; LOCATED IN: DNA replication factor C complex, intracellular; CONTAINS InterPro DOMAIN/s: DNA…	0	0.904732	1.08888	1.08007	0.90708	1.07068	1.20404	1.11475	6.1533	1.7357	0.018604	0.0329796	0.0122121	0.0457484	0.0557254	0.0507478	0.925561	1.12576	1.0822	0.898872	1.06222	1.06693	0.889764	1.07866	1.09108	0.932631	1.12488	1.15088	0.934345	1.07362	1.25197	0.854264	1.01354	1.20928	0.799244	0.510911	0.963869		S	2	___1	0.999103	0.0101913	95.483	44.038	79.07
A8I186	35.2	not assigned.unknown	(original description: Predicted protein (Fragment) OS=Chlamydomonas reinhardtii GN=CHLREDRAFT_143167 PE=4 SV=1)	0	1.05781	0.869243	0.848543	1.01435	0.865519	0.873412	0.110966	3.86023	0.251909	0.0257345	0.00967056	0.041443	0.044478	0.0794769	0.081467	1.08144	0.872064	0.866523	1.03039	0.858475	0.877959	1.06161	0.877189	0.801146	1.00239	0.783125	0.826336	0.977075	0.941716	0.967482	1.06359	0.871718	0.826419	0.515817	0.511818	0.948741		S	2	___1	0.999734	2.69551e-06	102.98	86.054	84.107
A8HQ72	27.1.1	RNA.processing.splicing	(chl4|511153 : 303.0) no description available & (gnl|cdd|35328 : 142.0) no description available & (loc_os07g47630.2 : 116.0) no description available & (at4g02430 : 105.0) RNA-binding (RRM/RBD/RNP motifs) family protein; FUNCTIONS IN: RNA binding, nucleotide binding, nucleic acid binding; INVOLVED IN: biological_process unknown; LOCATED IN: cellular_component unknown; EXPRESSED IN: 23 plant str…	Cre01.g026450.t1.2	0.976505	1.01413	1.3401	1.15263	1.15111	1.26801	0.331453	0.775955	0.216989	0.149637	0.276283	0.037491	0.083267	0.278466	0.350764	1.1147	0.851379	1.29716	0.997231	1.33313	1.36633	0.817585	0.857873	1.35681	1.22391	0.83402	0.863606	1.17288	1.35585	1.48971	1.06111	1.26346	1.45071	0.561519	0.512618	0.296993		S	2	___2	1	0.00323442	116.9	92.392	102.63
A8HQ72	27.1.1	RNA.processing.splicing	(chl4|511153 : 303.0) no description available & (gnl|cdd|35328 : 142.0) no description available & (loc_os07g47630.2 : 116.0) no description available & (at4g02430 : 105.0) RNA-binding (RRM/RBD/RNP motifs) family protein; FUNCTIONS IN: RNA binding, nucleotide binding, nucleic acid binding; INVOLVED IN: biological_process unknown; LOCATED IN: cellular_component unknown; EXPRESSED IN: 23 plant str…	Cre01.g026450.t1.2	1.01543	1.01136	1.3401	1.15263	1.14416	1.25982	0.244578	0.69229	0.184703	0.0915398	0.285307	0.037491	0.083267	0.290345	0.364926	1.1147	0.789262	1.29716	0.997231	1.33313	1.36633	0.934352	0.911678	1.35681	1.22391	0.813169	0.83904	1.17288	1.35585	1.48971	1.06111	1.26346	1.45071	0.615539	0.512618	0.356713		S	2	___2	1	0.00323442	116.9	92.392	102.63
A8IU86	35.2	not assigned.unknown	(original description: Prolyl-tRNA synthetase OS=Chlamydomonas reinhardtii GN=CHLREDRAFT_206159 PE=4 SV=1)	0	1.02074	1.12602	1.1417	1.06262	1.09144	1.12996	0.0226252	1.81852	0.398987	0.0719302	0.0574211	0.0496011	0.0166454	0.03268	0.0410568	0.944627	1.09376	1.09758	1.08759	1.09198	1.19539	1.03001	1.19231	1.13213	1.04844	1.06777	1.15327	1.08095	1.12873	1.08256	1.05847	1.07783	1.15406	0.497944	0.513985	0.720524		S	3	___1	1	7.83356e-09	95.153	78.817	60.171
A8IRD5	13.1.2.2.1	amino acid metabolism.synthesis.glutamate family.proline.delta 1-pyrroline-5-carboxylate synthetase	(chl4|517197 : 570.0) no description available & (gnl|cdd|81584 : 320.0) no description available & (gnl|cdd|36369 : 211.0) no description available & (loc_os01g62900.1 : 117.0) no description available & (o04226|p5cs_orysa : 115.0) Delta 1-pyrroline-5-carboxylate synthetase (P5CS) [Includes: Glutamate 5-kinase (EC 2.7.2.11) (Gamma-glutamyl kinase) (GK); Gamma-glutamyl phosphate reductase (GPR) (…	0	1.06067	0.967762	1.02784	0.972408	0.922451	1.03485	1.36834	2.23992	0.809871	0.0350485	0.0267382	0.0378784	0.0388469	0.0618573	0.0255524	1.09183	0.940939	0.995225	1.02272	0.967931	1.01892	1.06744	0.994415	1.06939	1.00572	0.986289	1.00756	0.929737	0.918278	1.05821	0.981765	0.862786	1.03877	0.842312	0.514361	0.223444		T	2	___1	0.861106	0.00122367	111.78	79.742	107.63
A8HZ49	35.2	not assigned.unknown	(original description: Predicted protein (Fragment) OS=Chlamydomonas reinhardtii GN=CHLREDRAFT_93782 PE=4 SV=1)	0	1.07458	1.11149	1.02477	0.963943	1.01803	1.04005	0.610366	0.11695	0.242685	0.0700802	0.0405747	0.125812	0.090626	0.0950334	0.178944	1.14719	1.13957	0.882691	1.00734	1.06497	1.06956	1.06921	1.12992	1.12206	1.04441	1.09036	0.834789	0.865771	0.910398	1.16321	0.981647	1.05333	1.12215	0.60017	0.515576	0.289403		S	3	___1	0.965808	1.73532e-06	73.574	34.067	42.321
A8JCA2	35.2	not assigned.unknown	(original description: Predicted protein OS=Chlamydomonas reinhardtii GN=CHLREDRAFT_185446 PE=4 SV=1)	0	0.893938	0.864819	0.888616	0.901003	0.889039	0.903644	0.299606	0.149633	0.0213978	0.0768142	0.0285873	0.0207237	0.0442821	0.0308851	0.0578377	0.956168	0.872219	0.890825	0.91756	0.888979	0.908147	0.808088	0.83326	0.866876	0.907411	0.883156	0.852247	0.853866	0.922442	0.892412	0.941731	0.861518	0.966274	0.44442	0.516441	0.0724073		S	2	___1	0.999968	0.0056454	96.756	65.278	95.417
[truncated: 676 more rows]
[truncated: 23 more columns]

## Sheet: PCA Loadings
Unique ID	BINCODE	NAME	DESCRIPTION	N: C0	N: C24	N: C48	N: R0	N: R24	N: R48	N: -Log Two-way ANOVA p value treatment	N: -Log Two-way ANOVA p value time	N: -Log Two-way ANOVA p value Interaction	N: stddev C0	N: stddev C24	N: stddev C48	N: stddev R0	N: stddev R24	N: stddev R48		Component 2	Component 3	Component 4	Component 5	Component 6	Component 7	Component 8	Component 9	Component 10	Component 11	Component 12	Component 13	Component 14	Component 15	Component 16	Component 17	C: Amino acid	C: Charge	C: Multiplicity	N: Localization prob	N: PEP	N: Score	N: Delta score	N: Score for localization	N: Mass error [ppm]	N: Intensity	N: Position	N: Score diff	N: Position in peptide	T: Proteins
[truncated: 1,311 more rows]
[truncated: 8 more columns]
